# Supplementary material for: Comparative Proteomic Analysis of Paulownia fortunei Response to Phytoplasma Infection with Dimethyl Sulfate Treatment
Source: Int J Genomics. 2017 Sep 5;2017:6542075. doi: 10.1155/2017/6542075 (PMC5605944; doi:10.1155/2017/6542075)
Supplement: Supplementary file 7 [file 6542075.f7.xlsx]

## Sheet: Sheet1
Supplementary Table 1: All proteins identified by iTRAQ in P. fortunei.
Hits	Accession	Desription	Mass	Seq	Score	Cov	SameSets	Spectrum	Unique Spectrum	Peptide	Unique Peptide	set1@Ratio@PF_113-VS-PFI_116	set2@Ratio@PF_113-VS-PFI_116	set1@QuantNumber@PF_113-VS-PFI_116	set2@QuantNumber@PF_113-VS-PFI_116	set1@Sig@PF_113-VS-PFI_116	set2@Sig@PF_113-VS-PFI_116	set1@Ratio@PFI-15_119-VS-PFI-75_121	set2@Ratio@PFI-15_119-VS-PFI-75_121	set1@QuantNumber@PFI-15_119-VS-PFI-75_121	set2@QuantNumber@PFI-15_119-VS-PFI-75_121	set1@Sig@PFI-15_119-VS-PFI-75_121	set2@Sig@PFI-15_119-VS-PFI-75_121	set1@Ratio@PFI_116-VS-PFI-15_119	set2@Ratio@PFI_116-VS-PFI-15_119	set1@QuantNumber@PFI_116-VS-PFI-15_119	set2@QuantNumber@PFI_116-VS-PFI-15_119	set1@Sig@PFI_116-VS-PFI-15_119	set2@Sig@PFI_116-VS-PFI-15_119	set1@Ratio@PF_113-VS-PFI-75_121	set2@Ratio@PF_113-VS-PFI-75_121	set1@QuantNumber@PF_113-VS-PFI-75_121	set2@QuantNumber@PF_113-VS-PFI-75_121	set1@Sig@PF_113-VS-PFI-75_121	set2@Sig@PF_113-VS-PFI-75_121	Accession	NCBInr Identity	NCBInr E_Value	NCBInr Accession	NCBInr Description	Uniprot_Swissprot Identity	Uniprot_Swissprot E_Value	Uniprot_Swissprot Accession	Uniprot_Swissprot Description	Uniprot_Tremble Identity	Uniprot_Tremble E_Value	Uniprot_Tremble Accession	Uniprot_Tremble Description	Protein_or_Domain
1	gi|357144267|ref|XP_003573231.1|	PREDICTED: histone-lysine N-methyltransferase SUVR2-like [Brachypodium distachyon]	96997	MGSNNERFKKAFEAMKPLGISKKQMKPILRHLYNLFDKNWEPIEEENYRILADAILDAQNERPMPAAPNDETNGEPTPHSSTQLRPDDQRPSASASCYYTDVNDNETPLIKRSRRSRMSSADFVHEQPTQPIAIEGMSSQPASLQPNEPIRALAVVRQADDHGDPSSIVACKRDKGLLLESPEDVLFLNGPEPEIDLPAAPVAKHLNTSSSGGKNMLIKHSKTREVLGSGADEVGYPVQNTPQTPSVELDLASSTMGEVKMSLKCKFDPSKVRISLDKVLKMVEDKCLRSYKILPPDFSIGKLMNEVCQYVAESGAVHSEAQSKGGSLQKEAVESDAPSVKPIACKHAVDGNSNAAVGFTVSESSEPTFQNCIVSCQPELPLSKQRPLHDVADISKGEE…	-|16	-|1.7	-|-	-|1	-|1	-|1	-|1	-	---	-	-	-	-	-	---	-	-	-	-	-	---	-	-	-	-	-	---	-	-	-	-	gi|357144267|ref|XP_003573231.1|	100	0	gi|357144267|ref|XP_003573231.1|	PREDICTED: histone-lysine N-methyltransferase SUVR2-like [Brachypodium distachyon]	57.79	8e-120	sp|Q8W595|SUVR4_ARATH	Histone-lysine N-methyltransferase SUVR4 OS=Arabidopsis thaliana GN=SUVR4 PE=2 SV=2	100	7e-113	I1I063	I1I063_BRADI Uncharacterized protein OS=Brachypodium distachyon GN=BRADI3G12790 PE=4 SV=1	SPBC428.08c
2	gi|34996397|emb|CAE47438.1|	putative 1-deoxy-D-xylulose 5-phosphate reductoisomerase [Hordeum vulgare subsp. vulgare]	61819	MALKASFSGELAGAPSLLDSGSVSSRGGAAFRHRQRQRCKVDFTFQRRDKRAVYLTRTCCSMQQGPPPAWPGRAVVEPGRRSWEGPKPISIVGSTGSIGTQTLDIVAENPDKFRVVALAAGSNVTLLADQVKTFKPKLVALRDESLLNELKEALAGCEEMPEIIPGEQGVIEVARHPDAVTVVTGIVGCAGLKPTVAAIEAGKDIALANKETLIAGGPFVLPLAHKHNVKILPADSEHSAIFQCIQGLSEGSLRRVILTASGGAFRDWPVEKLKDVKVADALKHPNWSMGKKITVDSATLFNKGLEVIEAHYLFGAEYDDIDIVIHPQSIIHSMIETQDSSVLAQLGWPDMRLPILYTLSWPDRVYCSEVTWPRLDLCKLGSLTFKAPDNVKYPSVDLA…	-|161	-|12.6	-|8	-|8	-|5	-|4	-|2	-	1.051	-	4	-	-	-	0.731	-	4	-	-	-	1.372	-	4	-	*	-	0.989	-	4	-	-	gi|34996397|emb|CAE47438.1|	100	0	gi|34996397|emb|CAE47438.1|	putative 1-deoxy-D-xylulose 5-phosphate reductoisomerase [Hordeum vulgare subsp. vulgare]	87.37	0	sp|Q8W250|DXR_ORYSJ	1-deoxy-D-xylulose 5-phosphate reductoisomerase, chloroplastic OS=Oryza sativa subsp. japonica GN=DXR PE=2 SV=2	100	0	Q70EZ8	Q70EZ8_HORVU Putative 1-deoxy-D-xylulose 5-phosphate reductoisomerase (Precursor) OS=Hordeum vulgare GN=dxr PE=2 SV=1	alr4351
3	gi|7208771|emb|CAB76908.1|	putative Ruv DNA-helicase [Cicer arietinum]	61885	MEKMKIEEVQSTTKKQRVATHTHIKGLGLEVSGKALPFASGFVGQAEAREACGLVVDMIRQKKMAGKALLLAGPPGTGKTALALGICQELGTKVPFCPMVGSEVYSTEVKKTEVLMENFRRAIGLRIKENKEVYEGEVTELSPEETESLTGGYGKSISHVIIGLKTVKGTKQLKLDPTIYDALIKEKVAVGDVIYIEANSGAVKRVGRSDAFATEFDLEAEEYVPLPKGEVHKKKEIVQDVTLHDLDAANARPQGGQDILSLMGQMMKPRKTEITDKLRQEINKVVNRYIDEGVAELVPGVLFIDEVHMLDMECFSYLNRALESSLSPIVIFATNRGICTVRGTDMTSPHGIPVDLLDRLVIIRTQTYGPAEIIQILAIRAQVEELVVDEESLAFLGEI…	-|26	-|2.6	-|13	-|1	-|1	-|1	-|1	-	---	-	-	-	-	-	---	-	-	-	-	-	---	-	-	-	-	-	---	-	-	-	-	gi|7208771|emb|CAB76908.1|	100	0	gi|7208771|emb|CAB76908.1|	putative Ruv DNA-helicase [Cicer arietinum]	75.38	0	sp|Q9DE26|RUVB1_XENLA	RuvB-like 1 OS=Xenopus laevis GN=ruvbl1 PE=2 SV=1	100	0	Q9M3Z6	Q9M3Z6_CICAR Putative Ruv DNA-helicase OS=Cicer arietinum PE=2 SV=1	SPAPB8E5.09
4	gi|21535793|emb|CAC85725.1|	putative carbamoyl phosphate synthase small subunit [Nicotiana tabacum]	55665	MDCSIRIQNPLSTTTITSALFSNKKSANFRVFTVGCSSKILSSDGAPSGLVERPWKVADARLVLEDGSIWKAKSFGASGTQVGEVVFNTSLTGYQEILTDPSYAGQFVLMTNPHIGNTGVNFGDEESMQCFLAGLVIRSLSISTSNWRCKETLDEYLAKRNIMGIYDVDTRAITRRLRQDGSLIGVLSTENSKTDEELLEMSRTWDIVGVDLISGVSCKSPYEWVDRTASDWDFNDNGRNKETFNVVAYDFGIKHNILRRLASYGCKITVVPSTWPASETLKMKPDGVLFSNGPGDPSAVPYAVEAVKELIGKIPVFGICMGHQLLGQALGGKTFKMKFGHHGGNHPVRNLRNGCVEISAQNHNYAVDPESLPEGVEVTHVNLNDGSCAGLASFKMKLM…	28|26	3.5|3.5	14|14	1|1	1|1	1|1	1|1	---	---	-	-	-	-	---	---	-	-	-	-	---	---	-	-	-	-	---	---	-	-	-	-	gi|21535793|emb|CAC85725.1|	100	0	gi|21535793|emb|CAC85725.1|	putative carbamoyl phosphate synthase small subunit [Nicotiana tabacum]	52.15	7e-106	sp|C5BQ30|CARA_TERTT	Carbamoyl-phosphate synthase small chain OS=Teredinibacter turnerae (strain ATCC 39867 / T7901) GN=carA PE=3 SV=1	100	0	Q8L6J8	Q8L6J8_TOBAC Putative carbamoyl phosphate synthase small subunit OS=Nicotiana tabacum PE=2 SV=1	alr1155
5	gi|169540|gb|AAA63452.1|	pyrophosphate-fructose 6-phosphate 1-phosphotransferase beta-subunit [Solanum tuberosum]	68278	MALLHLPPVTQRRLQSFFLPYTDNHVSLVPDDSGDVAMNQILKIGVVLSGGQAPGGHNVISGIFDYLQTHCKGSTMYGFRGGPAGVMKGKYVVLTPEFIYPYRNQGGFDMICSGRDKIETPEQFKQAEETAKKLDLDGLVVIGGDDSNTNACLLAENFRSKNLKTRVIGCPKTIDGDLKSKEVPTSFGFDTACKIYAEMIGNVMIDARSTGKYYHFVRLMGRAASHITLECALQTHPNVTLIGEEVFAKKLTLKNVTDYIADVVCKRAESGYNYGVILIPEGLIDFIPEVQQLIAELNEILAHDVVDEAGVWKKKLTPQCLELFELLPLAIQEQLLLERDPHGNVQVAKIETEKMLIQMVETELDQRKQKGAYNAQFKGQFHFFGYEGRCGLPSNFDST…	48|17	2.1|2.1	21|21	2|1	2|1	1|1	1|1	0.51	---	2	-	-	-	0.751	---	2	-	-	-	1.005	---	2	-	-	-	0.346	---	2	-	-	-	gi|169540|gb|AAA63452.1|	100	0	gi|169540|gb|AAA63452.1|	pyrophosphate-fructose 6-phosphate 1-phosphotransferase beta-subunit [Solanum tuberosum]	99.39	0	sp|P21343|PFPB_SOLTU	Pyrophosphate--fructose 6-phosphate 1-phosphotransferase subunit beta OS=Solanum tuberosum PE=1 SV=2	100	3e-168	A7XV37	A7XV37_TOBAC Pyrophosphate-fructose 6-phosphate 1-phosphotrasferase beta subunit (Fragment) OS=Nicotiana tabacum GN=PFP PE=2 SV=1	TP0542
6	gi|224132938|ref|XP_002327916.1|	predicted protein [Populus trichocarpa] >gi|222837325|gb|EEE75704.1| predicted protein [Populus trichocarpa]	105567	MAEEPGSQSVPSQSQPPQSSSAAPLGSSVIPIVNKLQDIFAQLGSQSTIELPQVAVVGSQSSGKSSVLEALVGRDFLPRGNEICTRRPLVLQLLQTKRKGDGCGEEEWGEFLHLPGKRFYDFSEIRSEIQAETAKEAGGNKGVSDKQIRLKIFSPNVLDITLVDLPGITKVPVGDQPSDIEARIRTMIMSYIKKPSCLILAVTAANSDLANSDALQIAGNADPDGYRTIGVITKLDIMDRGTDARNLLLGKVIPLRLGYVGVVNRSQEDIMLNRSIKDALAAEEKFFRSRPVYNGLADRCGVPQLAKKLNQILVQHIKTILPGLKSRISSALVSVAKEHASYGEITESKAGQGTLILNILSKYSEAFSSMVEGRNEEMSRSELSGGARIHYIFQSIFVK…	24|-	1.7|-	2|-	1|-	1|-	1|-	1|-	---	-	-	-	-	-	---	-	-	-	-	-	---	-	-	-	-	-	---	-	-	-	-	-	gi|224132938|ref|XP_002327916.1|	100	0	gi|224132938|ref|XP_002327916.1|	predicted protein [Populus trichocarpa] >gi|222837325|gb|EEE75704.1| predicted protein [Populus trichocarpa]	74.04	0	sp|Q8S944|DRP3A_ARATH	Dynamin-related protein 3A OS=Arabidopsis thaliana GN=DRP3A PE=1 SV=2	100	0	B9MXU0	B9MXU0_POPTR Predicted protein OS=Populus trichocarpa GN=POPTRDRAFT_920707 PE=3 SV=1	YLL001w
7	gi|40748267|gb|AAR89618.1|	60S ribosomal protein L13a [Capsicum annuum]	32160	MVSGSGISARRIVVDARHHMLGRLSSILAKELLNGQRVVVVRCEEICLSGGLVRQKMKYLRFLRKRMNTKPSHGPIHFRAPSKILWRTIRGMIPHKTKRGAAALARLKVYEGVPPPYDKIKRMVIPDALKVLRLQAGHKYCLLGKLSSEVGWNHYDTIKELEDKRKERAQVTYERRKQLAKLRVKAERLPRRSSVLNLQLSNQSVLECNRNLSLVKFAGY	44|31	5.0|5.0	5|5	1|1	1|1	1|1	1|1	---	---	-	-	-	-	---	---	-	-	-	-	---	---	-	-	-	-	---	---	-	-	-	-	gi|40748267|gb|AAR89618.1|	100	2e-115	gi|40748267|gb|AAR89618.1|	60S ribosomal protein L13a [Capsicum annuum]	89.42	2e-97	sp|Q9FKC0|R13A4_ARATH	60S ribosomal protein L13a-4 OS=Arabidopsis thaliana GN=RPL13AD PE=2 SV=1	100	2e-114	Q6RH10	Q6RH10_CAPAN 60S ribosomal protein L13a OS=Capsicum annuum GN=RpL13a PE=2 SV=1	YNL069c
8	gi|118484853|gb|ABK94293.1|	unknown [Populus trichocarpa]	39151	MARGLKKHLKRLNAPKHWMLDKLGGAFAPKPSSGPHKSRECLPLILILRNRLKYALTGREVLAILMQRHVLVDGKVRTDKTYPSGFMDVVSIPKTNESFRLLYDTKGRFRLHSLRDDEAKFKLCKVRSVQFGQKGIPYLNTYDGRTIRYPDPLIKANDTIKLDLENNKIVDFIKFDVGNVVMVTGGRNRGRVGVIKNREKHKGTFETIHVQDATGHEFATRLGNVFTIGKGTKPWISLPKGKGIKLSIIEEAKKRLAASQAAA	132|-	10.3|-	18|-	5|-	1|-	2|-	1|-	---	-	-	-	-	-	---	-	-	-	-	-	---	-	-	-	-	-	---	-	-	-	-	-	gi|118484853|gb|ABK94293.1|	100	1e-131	gi|224122992|ref|XP_002318967.1|	predicted protein [Populus trichocarpa] >gi|222857343|gb|EEE94890.1| predicted protein [Populus trichocarpa]	93.23	7e-124	sp|P46299|RS4_GOSHI	40S ribosomal protein S4 OS=Gossypium hirsutum GN=RPS4 PE=2 SV=1	100	1e-131	A9PD40	A9PD40_POPTR Putative uncharacterized protein OS=Populus trichocarpa PE=2 SV=1	SPBC21B10.10
9	gi|470114540|ref|XP_004293472.1|	PREDICTED: cytochrome b6-f complex iron-sulfur subunit, chloroplastic-like [Fragaria vesca subsp. vesca]	28162	MAASTLSSATTSQLCSSKSAMFSSAQALSVMPRRTQLMGKGKGMRITCQAAIPADNVPDMGKRKLMNLLLLGAISLPSGFMLVPYATFFAPPGSGSGSGGQTAKDALGNDVIASEWLKTHGPGDKTLTQGLKGDPTYLVVEKDRTLATYGINAVCTHLGCVVPFNSAENKFICPCHGSQYNDQGRVVRGPAPLSLALAHADIDEGKVIFVPWVETDFRTGDAPWWS	-|107	-|11.5	-|-	-|10	-|8	-|2	-|1	-	0.701	-	5	-	-	-	0.363	-	6	-	*	-	2.851	-	5	-	*	-	0.663	-	6	-	*	gi|470114540|ref|XP_004293472.1|	100	3e-115	gi|470114540|ref|XP_004293472.1|	PREDICTED: cytochrome b6-f complex iron-sulfur subunit, chloroplastic-like [Fragaria vesca subsp. vesca]	83.06	2e-84	sp|Q69S39|UCRIA_ORYSJ	Cytochrome b6-f complex iron-sulfur subunit, chloroplastic OS=Oryza sativa subsp. japonica GN=petC PE=1 SV=1	87.84	1e-34	C6K8E8	C6K8E8_LEMMI Putative cytochrome b6f Rieske iron-sulfur subunit (Fragment) OS=Lemna minor PE=2 SV=1	sll1316
10	gi|460369945|ref|XP_004230817.1|	PREDICTED: presequence protease 1, chloroplastic/mitochondrial-like [Solanum lycopersicum]	142629	MERAVLLRSLSSTSTLAFSRIFSRSSHRFASYSARRHRLLQNLQRRRSLVRSNVRGISSSINLKRQFYPLSVRAIATSSPQSSQEFLGADDEVAEKFGFEKVSEQFIDECKSKAVLYKHKKTGAEVMSVSNDDENKVFGVVFRTPPKDSTGIPHILEHSVLCGSRKYPLKEPFVELLKGSLNTFLNAFTYPDRTCYPVASTNTKDFYNLVDVYLDAVFFPKCVEDFQTFQQEGWHYELNDPSDEITFKGVVFNEMKGVYSQPDNLLGRTSQQALFPDNTYGVDSGGDPRVIPSLSFEDFKEFHRKFYHPSNARIWFYGDDDPNERLRILSEYLNMFDASSAPHESRVEPQRLFSEPVRIVEKYPVGEDGDLKKKHMVCVNWLLSDKPLDLETELALGFL…	74|77	1.2|4.3	-|-	2|5	2|1	1|4	1|1	---	---	1	1	-	-	---	---	-	-	-	-	---	---	1	1	-	-	---	---	-	-	-	-	gi|460369945|ref|XP_004230817.1|	100	0	gi|460369945|ref|XP_004230817.1|	PREDICTED: presequence protease 1, chloroplastic/mitochondrial-like [Solanum lycopersicum]	77.56	0	sp|Q9LJL3|PREP1_ARATH	Presequence protease 1, chloroplastic/mitochondrial OS=Arabidopsis thaliana GN=PREP1 PE=1 SV=2	83	0	F2D4A2	F2D4A2_HORVD Predicted protein OS=Hordeum vulgare var. distichum PE=2 SV=1	CAC3006
11	gi|288816155|gb|ADC54901.1|	oxygen-evolving enhancer protein [Ignatius tetrasporus]	18977	QIKGSGIANTCPVIEGGSSNPKSDLKSGTYKFDNFCMEPTSFQVKEESQFKGGNEEFVNTKLMTRLTYTLDAMSGEIRINGGNVQFIEEDGIDYAPVTVQLPGGERVPFLFTVKQLDARGTVDAFSGXFLVPSYRGSSFLDPKGR	-|50	-|20.0	-|-	-|6	-|3	-|3	-|2	-	---	-	-	-	-	-	---	-	-	-	-	-	---	-	-	-	-	-	---	-	-	-	-	gi|288816155|gb|ADC54901.1|	100	5e-79	gi|288816155|gb|ADC54901.1|	oxygen-evolving enhancer protein [Ignatius tetrasporus]	71.23	6e-57	sp|P12853|PSBO_CHLRE	Oxygen-evolving enhancer protein 1, chloroplastic OS=Chlamydomonas reinhardtii GN=PSBO PE=2 SV=1	100	6e-78	E3SC34	E3SC34_9CHLO Oxygen-evolving enhancer protein (Fragment) OS=Ignatius tetrasporus GN=OEE1 PE=2 SV=1	-
12	gi|413968550|gb|AFW90612.1|	Fk506-binding protein [Solanum tuberosum]	21031	MEFGRAFNATSIFIVFLLVTLVSAKKSGDVTELQIGVKFKPTSCELKAHKGDRVSVHYSGKLTDGTVFDSSYERNDPIEFELGSGQVIKGWDQGLLGMCVGEKRKLKIPAKLGYSESGSPPKIPGGATLVFDTELVAVNGKKTTTDSEL	34|67	18.8|10.1	1|1	2|1	2|1	2|1	2|1	---	---	-	1	-	-	---	---	-	1	-	-	---	---	-	1	-	-	---	---	-	1	-	-	gi|413968550|gb|AFW90612.1|	100	9e-82	gi|413968550|gb|AFW90612.1|	Fk506-binding protein [Solanum tuberosum]	76.87	7e-56	sp|Q41649|FKB15_VICFA	FK506-binding protein 2 OS=Vicia faba GN=FKBP15 PE=1 SV=1	83.61	1e-54	I1QQ67	I1QQ67_ORYGL Uncharacterized protein OS=Oryza glaberrima PE=4 SV=1	YDR519w
13	gi|356527573|ref|XP_003532383.1|	PREDICTED: chaperone protein ClpC, chloroplastic-like [Glycine max]	121746	MARVLAQSTGMPGLLSGRRHGPHKGSGKTKRSVKMMSTLRIPALRMSSFSGLRTLNPLDSVSRPRHTFPLTTTSRRERAKRCVPKAMFERFTEKAIKVIMLAQEEARRLGHNFVGTEQILLGLIGEGTGIAAKVLKSMGINLKDARVEVEKIIGRGSGFVAVEIPFTSRAKRVLELSLEEARQLGHNYIGSEHLLLGLLREGEGVAARVLENLAADPNNIRAQVIRMVGEGADSVGATVGPGSSNNNKMPTLEEYGTNLTKLAEEGKLDPVMGRQPQIERVTQILGRRTKNNPCLIGEPGVGKTAIAEGLAQRIANGDVPETIEGKKVITLDMGLLVAGTKYRGEFEERLKKLMEEIKQSDEIILFIDEVHTLIGAGAAEGAIDAANILKPALARGELQ…	-|411	-|12.4	-|-	-|18	-|1	-|9	-|1	-	---	-	-	-	-	-	---	-	-	-	-	-	---	-	-	-	-	-	---	-	-	-	-	gi|356527573|ref|XP_003532383.1|	100	0	gi|356527573|ref|XP_003532383.1|	PREDICTED: chaperone protein ClpC, chloroplastic-like [Glycine max]	90.77	0	sp|P35100|CLPC_PEA	Chaperone protein ClpC, chloroplastic OS=Pisum sativum PE=2 SV=1	100	0	I1KP32	I1KP32_SOYBN Uncharacterized protein OS=Glycine max GN=Gma.42314 PE=4 SV=1	alr2999
14	gi|255567721|ref|XP_002524839.1|	carboxymethylenebutenolidase, putative [Ricinus communis] >gi|223535899|gb|EEF37559.1| carboxymethylenebutenolidase, putative [Ricinus communis]	36613	MLAAAIRSLSPSSTSSIFNKSALPPLLRSLSPSLSNSRFQIRSMADSASSPFKKVQIHRDNTTFDAYVIGKDDAPGIVVVQEWWGVDFEIKNHAEKISQLEPGFKALIPDLYRGKVGLDVAEAQHLMDGLDWQGAVKDIGASVNWLKANGSKKAGVTGFCMGGALAIASSVLVPEVDAVVAFYGVPPSELADATQAKAPIQAHFGELDNFVGFADITAAKALEEKLKASGVPSEVHIYPGNAHAFMNRSAEGVKRRKSMGMPDEDEAAVELAWSRFRSWMNQYLSA	52|112	4.2|11.9	-|-	1|2	1|2	1|2	1|2	---	---	1	1	-	-	---	---	1	1	-	-	---	---	1	1	-	-	---	---	1	1	-	-	gi|255567721|ref|XP_002524839.1|	100	6e-141	gi|255567721|ref|XP_002524839.1|	carboxymethylenebutenolidase, putative [Ricinus communis] >gi|223535899|gb|EEF37559.1| carboxymethylenebutenolidase, putative [Ricinus communis]	33.14	2e-08	sp|P0A115|CLCD_PSESB	Carboxymethylenebutenolidase OS=Pseudomonas sp. (strain B13) GN=clcD PE=1 SV=1	100	7e-140	B9SFS0	B9SFS0_RICCO Carboxymethylenebutenolidase, putative OS=Ricinus communis GN=RCOM_1226380 PE=4 SV=1	RSp1339
15	gi|225468340|ref|XP_002272246.1|	PREDICTED: probable small nuclear ribonucleoprotein F [Vitis vinifera] >gi|296083390|emb|CBI23345.3| unnamed protein product [Vitis vinifera]	11870	MATVPLNPKPFLNNLTGKPVIVKLKWGMEYKGYLVSVDSYMNLQLANSEEYIDGQFTGNLGEILIRCNNVLYLRGVPEDEEIEEADRD	41|-	15.9|-	-|-	1|-	1|-	1|-	1|-	---	-	-	-	-	-	---	-	-	-	-	-	---	-	-	-	-	-	---	-	-	-	-	-	gi|225468340|ref|XP_002272246.1|	100	5e-45	gi|225468340|ref|XP_002272246.1|	PREDICTED: probable small nuclear ribonucleoprotein F [Vitis vinifera] >gi|296083390|emb|CBI23345.3| unnamed protein product [Vitis vinifera]	86.36	2e-40	sp|Q9SUM2|RUXF_ARATH	Probable small nuclear ribonucleoprotein F OS=Arabidopsis thaliana GN=At4g30220 PE=2 SV=1	100	7e-44	D7SYP2	D7SYP2_VITVI Putative uncharacterized protein OS=Vitis vinifera GN=VIT_00s0220g00030 PE=4 SV=1	SPAC2F3.17c
16	gi|414888259|tpg|DAA64273.1|	TPA: phospholipase D family protein [Zea mays]	112049	MASPAGGESPAKPVLLHGDLDLWILEARLLPNMDMFSEHVRRCFAACRPPSSCGTKHPPPAAAGRRHHHHHRNIITSDPYVTLSVSGAVVARTAVIPNSQDPVWEERFAVPLAHRAADLEFQVKDNDTFGAQLIGTVAVPADRVVSGDEVEDWFPVIGTNGKPYKPDTALRLRFKFQPIADNPAYRHGIAGDPDHRGIQDSYFPLRHGGQLTLYQDAHVREGDLPEIELDNGKTFQHNACWEDICHAILEAHHMIYIVGWSVYDKVRLVREPSPSRPLPEGGDLTLGDLLKFKSQEGVRVCLLVWDDKTSHDKFFIKTGGVMATHDEETRKFFKHSSVICVLSPRYASNKLSIFKQQVVGTLFTHHQKCVLVDTQARGNKRKITAFIGGLDLCDGRYDT…	22|-	1.5|-	-|-	1|-	1|-	1|-	1|-	---	-	-	-	-	-	---	-	-	-	-	-	---	-	-	-	-	-	---	-	-	-	-	-	gi|414888259|tpg|DAA64273.1|	100	0	gi|414888259|tpg|DAA64273.1|	TPA: phospholipase D family protein [Zea mays]	63.48	0	sp|Q9C5Y0|PLDD1_ARATH	Phospholipase D delta OS=Arabidopsis thaliana GN=PLDDELTA PE=1 SV=2	94.88	0	C5X6Y6	C5X6Y6_SORBI Phospholipase D OS=Sorghum bicolor GN=Sb02g031540 PE=3 SV=1	ECU11g1180
17	gi|15224821|ref|NP_179558.1|	F-type H+-transporting ATPase subunit g [Arabidopsis thaliana] >gi|145329180|ref|NP_001077919.1| F-type H+-transporting ATPase subunit g [Arabidopsis thaliana] >gi|13899095|gb|AAK48969.1|AF370542_1 copia-like retroelement pol polyprotein [Arabidopsi	18021	MASKLVQLQSKACQASKFVAKHGNSYYKQLLEQNKQYIQEPATIEKCSELSKQLLYTRLASIPGRYETFRKEVDYAKNLLKNRANLKVEDAGIAALFGLECFAWFCAGEIVGRGFTFTGYYP	35|-	7.4|-	9|-	1|-	1|-	1|-	1|-	---	-	-	-	-	-	---	-	-	-	-	-	---	-	-	-	-	-	---	-	-	-	-	-	gi|15224821|ref|NP_179558.1|	100	1e-66	gi|15224821|ref|NP_179558.1|	F-type H+-transporting ATPase subunit g [Arabidopsis thaliana] >gi|145329180|ref|NP_001077919.1| F-type H+-transporting ATPase subunit g [Arabidopsis thaliana] >gi|13899095|gb|AAK48969.1|AF370542_1 copia-like retroelement pol polyprotein [Arabidopsis thaliana] >gi|3687249|gb|AAC62147.1| copia-like retroelement pol polyprotein [Arabidopsis thaliana] >gi|18377532|gb|AAL66932.1| copia-like retroelem…	-	-	-	-	100	1e-65	O82209	O82209_ARATH Copia-like retroelement pol polyprotein OS=Arabidopsis thaliana GN=At2g19680/F6F22.29 PE=2 SV=1	-
18	gi|255637428|gb|ACU19042.1|	unknown [Glycine max]	32542	MTVTMAAAFTSTSATLRLSNVGESRGLQLRKCNPNPNKLKVMGGFGGCSGVAVGVRERKGIGRVRVRVRASSSSDEAVSAQSKVTQKVFFDVSIGNPVGKLVGRIVIGLYGDDVPQTAENFRALCTGEKGFGYKGSTFHRVIKNFMIQGGDFDKGNGTGGKSIYGRTFKDENFNLSHTGPGVVSMANAGPNTNGSQFFICTVKTPWLDQRHVVFGQVLEGMDIVRLIESQETDRGDRPTKKVTISDCGELPNA	-|860	-|17.4	-|-	-|23	-|1	-|3	-|1	-	---	-	-	-	-	-	---	-	-	-	-	-	---	-	-	-	-	-	---	-	-	-	-	gi|255637428|gb|ACU19042.1|	100	9e-99	gi|255637428|gb|ACU19042.1|	unknown [Glycine max]	84.62	2e-76	sp|Q9ASS6|CP20B_ARATH	Peptidyl-prolyl cis-trans isomerase CYP20-2, chloroplastic OS=Arabidopsis thaliana GN=CYP20-2 PE=1 SV=1	100	9e-98	C6TB40	C6TB40_SOYBN Peptidyl-prolyl cis-trans isomerase OS=Glycine max PE=2 SV=1	SPBC28F2.03
19	gi|46399269|gb|AAS92255.1|	putative pyridoxine biosynthesis protein isoform A [Nicotiana tabacum] >gi|46399271|gb|AAS92256.1| putative pyridoxine biosynthesis protein isoform B [Nicotiana tabacum]	37612	MAGSGVVTLYGNGALTETTKQSPFSVKVGLAQMLRGGVIMDVVNAEQARIAEEAGACAVMALERVPADIRAQGGVARMSDPQLIKEIKQAVTIPVMAKARIGHFVEAQILEAIGIDYVDESEVLTLADDENHINKHNFRIPFVCGCRNLGEALRRIREGAAMIRTKGEAGTGNIIEAVRHVRSVMGDIRVLRNMDDDEVFTFAKKLQAPYDLVMQTKQLGRLPVVHFAAGGVATPADAALMMQLGCDGVFVGSGIFKSGDPAKRGRAIVQAVTHYSDPGLLAEISCGLGEAMVGINLDDKVERYANRSE	164|-	11.3|-	-|-	6|-	1|-	3|-	1|-	---	-	-	-	-	-	---	-	-	-	-	-	---	-	-	-	-	-	---	-	-	-	-	-	gi|46399269|gb|AAS92255.1|	100	8e-171	gi|46399269|gb|AAS92255.1|	putative pyridoxine biosynthesis protein isoform A [Nicotiana tabacum] >gi|46399271|gb|AAS92256.1| putative pyridoxine biosynthesis protein isoform B [Nicotiana tabacum]	92.88	2e-155	sp|Q9FT25|PDX1_PHAVU	Pyridoxal biosynthesis protein PDX1 OS=Phaseolus vulgaris GN=PDX1 PE=2 SV=1	100	8e-170	Q6QND3	Q6QND3_TOBAC Putative pyridoxine biosynthesis protein isoform A OS=Nicotiana tabacum GN=Pdx1-B PE=3 SV=1	SPAC29B12.04
20	gi|3202034|gb|AAC19398.1|	root catalase [Mesembryanthemum crystallinum]	64585	MDPYKYRPSSSYNTSFMTTKTGQPVWNDDSSLTVGARGPILLEDYHLLEKIASWDRERIPERVVHARGASAKGFFEVTNDITHLTCADFLRAPGVQTPVIVRFSTVIHERGSPETMRDPRGFALKFYTREGNFDLVGNNFPVFFNRDAMKFPDVVRAFKPNPKSHIQEMWRILDFCSHLPESLHTFAWFFDDVGIPINYRHMEGFGVHTFTMLNRAGKETYVKFHWKPTCGVKSIVTEEEAIQVGGANHSHATQDLYDSIAAGNYPEWRLFIQTMDPADEDKFDFDPLDITKTWPEDILPLQPVGRLVLNKNIDNFFTENEMLAFNPASIVPGIHFSHDKMLQARTFAYADTQRHRLGVNFLLLPVNAPKCAHHNDHHDGFMNFMHRDEEVNYFPSRSN…	351|410	10.5|10.5	-|-	31|25	1|2	4|4	1|1	---	---	-	-	-	-	---	---	-	-	-	-	---	---	-	-	-	-	---	---	-	-	-	-	gi|3202034|gb|AAC19398.1|	100	0	gi|3202034|gb|AAC19398.1|	root catalase [Mesembryanthemum crystallinum]	77.28	0	sp|P49317|CATA3_NICPL	Catalase isozyme 3 OS=Nicotiana plumbaginifolia GN=CAT3 PE=2 SV=1	100	0	O81337	O81337_MESCR Root catalase OS=Mesembryanthemum crystallinum PE=2 SV=1	RSp1581
21	gi|2492504|sp|Q96372.1|CDC48_CAPAN	RecName: Full=Cell division cycle protein 48 homolog >gi|1669660|emb|CAA70565.1| protein of AAA family [Capsicum annuum]	106444	MTDQAESSDSKNAKKDFSTAILERKKAANRLVVDEAVNDDNSVVALHPATMEKLQLFRGDTILIKGKKRKDTVVIALADETCDEPKIRMNKVVRSNLRVRLGDVVSVHQCPDVKYGKRVHILPIDDTIEGLTGDLFDAFLKPYFLEAYRPLRKGDNFLVRGGMRSVEFKVIETDPGEYCVVAPDTEIFCEGEPVKREDEERLDEVGYDDVGGVRKQMAQIRELVELPLRHPQLFKSIGVKPPKGILLYGPPGSGKTLIARAVANETGAFFFCINGPEIMSKLAGESESNLRKAFEEAEKNAPSIIFIDEIDSIAPKREKTHGEVERRIVSQLLTLMDGLKSRAHVIVMGATNRPNSIDPALRRFGRFDREIDIGVPDEVGRLEVLGIHTKNMKLAEEVD…	214|-	8.1|-	10|-	15|-	1|-	6|-	1|-	---	-	-	-	-	-	---	-	-	-	-	-	---	-	-	-	-	-	---	-	-	-	-	-	gi|2492504|sp|Q96372.1|CDC48_CAPAN	100	0	gi|2492504|sp|Q96372.1|CDC48_CAPAN	RecName: Full=Cell division cycle protein 48 homolog >gi|1669660|emb|CAA70565.1| protein of AAA family [Capsicum annuum]	100	0	sp|Q96372|CDC48_CAPAN	Cell division cycle protein 48 homolog OS=Capsicum annuum GN=CAFP PE=2 SV=1	95.66	0	C5MQG8	C5MQG8_NICGU Cell division control protein OS=Nicotiana glutinosa GN=CDC48 PE=2 SV=1	YDL126c
22	gi|225456471|ref|XP_002284518.1|	PREDICTED: ATP-dependent Clp protease ATP-binding subunit clpA homolog CD4A, chloroplastic-like [Vitis vinifera]	121068	MARALVQSTNIFASVADGKHGKFQGSERTKKSVKMMCNVQAPGLRIRGFSGLRGANALDNLVRSGHDFHSRVAAAISVRGGKASRCVARAMFERFTEKAIKVIMLAQEEARRLGHNFVGTEQILLGLIGEGTGIAAKVLKSMGINLKDARVEVEKIIGRGSGFVAVEIPFTPRAKRVLELSLEEARQLGHNYIGSEHLLLGLLREGEGVAARVLENLGADPSNIRTQVIRMVGESTEAVGAGVGGGTTGNKMPTLEEYGTNLTKLAEEGKLDPVVGRQQQIERVTQILGRRTKNNPCLIGEPGVGKTAIAEGLAQRIANGDVPETIEGKKVITLDMGLLVAGTKYRGEFEERLKKLMEEIKQSDEIILFIDEVHTLIGAGAAEGAIDAANILKPALARG…	-|495	-|15.3	-|1	-|23	-|1	-|11	-|1	-	---	-	-	-	-	-	---	-	-	-	-	-	---	-	-	-	-	-	---	-	-	-	-	gi|225456471|ref|XP_002284518.1|	100	0	gi|225456471|ref|XP_002284518.1|	PREDICTED: ATP-dependent Clp protease ATP-binding subunit clpA homolog CD4A, chloroplastic-like [Vitis vinifera]	91.66	0	sp|P31542|CLPAB_SOLLC	ATP-dependent Clp protease ATP-binding subunit clpA homolog CD4B, chloroplastic OS=Solanum lycopersicum GN=CD4B PE=3 SV=1	100	0	F6GT40	F6GT40_VITVI Putative uncharacterized protein OS=Vitis vinifera GN=VIT_17s0000g00340 PE=3 SV=1	alr2999
23	gi|302833641|ref|XP_002948384.1|	hypothetical protein VOLCADRAFT_80163 [Volvox carteri f. nagariensis] >gi|300266604|gb|EFJ50791.1| hypothetical protein VOLCADRAFT_80163 [Volvox carteri f. nagariensis]	10363	MCPPSGPFYRVAGMSYVRYANLCADYLRAVMKEPFKSKALQRETVYFRSSPIADGKQGASNVVDAKGMPKPTSS	-|25	-|13.5	-|-	-|2	-|2	-|1	-|1	-	---	-	-	-	-	-	---	-	-	-	-	-	---	-	-	-	-	-	---	-	-	-	-	gi|302833641|ref|XP_002948384.1|	100	9e-37	gi|302833641|ref|XP_002948384.1|	hypothetical protein VOLCADRAFT_80163 [Volvox carteri f. nagariensis] >gi|300266604|gb|EFJ50791.1| hypothetical protein VOLCADRAFT_80163 [Volvox carteri f. nagariensis]	54.9	4e-11	sp|Q41898|ATP5E_MAIZE	ATP synthase subunit epsilon, mitochondrial OS=Zea mays PE=3 SV=1	100	1e-35	D8TPM8	D8TPM8_VOLCA Putative uncharacterized protein OS=Volvox carteri GN=VOLCADRAFT_80163 PE=4 SV=1	-
24	gi|350534760|ref|NP_001234158.1|	glucan endo-1,3-beta-D-glucosidase precursor [Solanum lycopersicum] >gi|498926|emb|CAA52872.1| glucan endo-1,3-beta-D-glucosidase [Solanum lycopersicum]	42573	MACTKLHFPITATTLLVILILATLDFTGAQTGVCYGRNGNGLPSPADVVALCNRNNIRRMRIYDPHQPTLQALRGSNIELILGVQILTFRISASSQANANRWVKHVRNYGNVKFRYIAVGNEVSPLNGNAQYVPFVINAMRNIQNAISGAGLGNQIKVSTAIETELTTDTYPPSRGKFKDNVRGYVDPIIRFLVANRSPLLVNIYPYFAIANNQAIKLDYALFTSPGVVVNDNGREYRNLFDALLDATYSALEKAGGSSLDIVVSESGWPSAGAGQLTSIDNARTYNNNLIRHVKRGSPKRPSKPIEAYIFALFNENLKSPEIEKHFGLFTPNRQPKYPISFN	38|37	3.8|3.8	1|1	1|1	1|1	1|1	1|1	---	---	-	-	-	-	---	---	-	-	-	-	---	---	-	-	-	-	---	---	-	-	-	-	gi|350534760|ref|NP_001234158.1|	100	0	gi|350534760|ref|NP_001234158.1|	glucan endo-1,3-beta-D-glucosidase precursor [Solanum lycopersicum] >gi|498926|emb|CAA52872.1| glucan endo-1,3-beta-D-glucosidase [Solanum lycopersicum]	80.62	3e-148	sp|P36401|E13H_TOBAC	Glucan endo-1,3-beta-glucosidase, acidic isoform PR-Q' OS=Nicotiana tabacum PE=1 SV=1	100	0	Q42890	Q42890_SOLLC Glucan endo-1,3-beta-D-glucosidase (Precursor) OS=Solanum lycopersicum GN=tomQ`b PE=2 SV=1	-
25	gi|6730738|gb|AAF27128.1|AC018849_16	unknown protein; 52184-57536 [Arabidopsis thaliana]	138556	MSSLSRELVFLILQFLDEEKFKETVHKLEQESGFFFNMKYFEDEVHNGNWDEVEKYLSGFTKVDDNRYSMKIFFEIRKQKYLEALDRHDRPKAVDILVKDLKVFSTFNEELFKEITQLLTLENFRENEQLSKYGDTKSARAIMLVELKKLIEANPLFRDKLQFPTLRTSRLRTLINQSLNWQHQLCKNPRPNPDIKTLFVDHSCRLPNDARAPSPVNNPLLGSLPKAEGFPPLGAHGPFQPTPSPVPTPLAGWMSSPSSVPHPAVSGGPIALGAPSIQAALKHPRTPPSNSAVDYPSGDSDHVSKRTRPMGISDEAALVKEPVVSVNRVIWSPDGSLFGVAYSRHIVQLYSYHGGEDMRQHLEIDAHVGGVNDIAFSTPNKQLCVTTCGDDKTIKVWDA…	-|43	-|0.7	-|29	-|1	-|1	-|1	-|1	-	---	-	1	-	-	-	---	-	-	-	-	-	---	-	1	-	-	-	---	-	-	-	-	gi|6730738|gb|AAF27128.1|AC018849_16	100	0	gi|6730738|gb|AAF27128.1|AC018849_16	unknown protein; 52184-57536 [Arabidopsis thaliana]	99.37	3e-169	sp|Q0WV90|TPR1_ARATH	Topless-related protein 1 OS=Arabidopsis thaliana GN=TPR1 PE=1 SV=3	97.48	1e-165	D7KX52	D7KX52_ARALL Putative uncharacterized protein OS=Arabidopsis lyrata subsp. lyrata GN=ARALYDRAFT_895943 PE=4 SV=1	all0478
26	gi|14717982|gb|AAK72733.1|	ATP synthase beta subunit [Callicarpa dichotoma]	33801	VLGEPVDNLGPVDTRTTFPIHRSAPAFIQLDTKLSIFETGIKVVDLLAPYRRGGKIGLFGGAGVGKTVLIMELINNIAKAHGGVSVFGGVGERTREGNDLYMEMKESGVINEENIAESKVALVYGQMNEPPGARMRVGLTALTMAEYFRDVNEQDVLLFIDNIFRFVQAGSEVSALLGRMPSAVGYQPTLSTEMGSLQERITSTKEGSITSIQAVYVPADDLTDPAPATTFAHLDATTVLSRGLAAKGIYPAVDPLDSTSTMLQPRIVGEEHYETAQRVKQTL	-|3468	-|78.8	-|1	-|149	-|2	-|15	-|1	-	1.273	-	2	-	-	-	---	-	1	-	-	-	0.605	-	2	-	*	-	---	-	1	-	-	gi|14717982|gb|AAK72733.1|	100	8e-163	gi|335059299|gb|AEH26924.1|	ATP synthase beta subunit [Chelone glabra] >gi|335060136|gb|AEH27363.1| ATP synthase beta subunit [Peltanthera floribunda]	99.65	2e-162	sp|Q3BAN5|ATPB_PHAAO	ATP synthase subunit beta, chloroplastic OS=Phalaenopsis aphrodite subsp. formosana GN=atpB PE=3 SV=1	100	1e-161	Q9SC20	Q9SC20_SESIN ATP synthase subunit beta (Fragment) OS=Sesamum indicum GN=atpB PE=3 SV=1	all5039
27	gi|460388438|ref|XP_004239874.1|	PREDICTED: chaperonin CPN60, mitochondrial-like [Solanum lycopersicum]	76641	MYRFAAKLASKSRVARSSTQQVGSRLNWSRNYAAKDIKFGVEARGIMLQGVEQLADAVKVTMGPKGRNVVIEQSWGAPKVTKDGVTVAKSIEFKDKIKNVGASLVKQVANATNDAAGDGTTCATVLTRAIFAEGCKSVAAGMNAMDLRRGITMAVDAVVTNLKSRARMISTSEEIAQVGTISANGEREIGEIIARAMEQVGKEGVITIQDGKTLLNDLQVVEGMKLDRGYISPYFITNEKNQKCELDDPLILIHEKKISSINAIVKVLELALKRQRPLLIVSEDVESEALATLILNKLRAGIKVCAIKAPGFGENRKANLQDLAALTGGQVITEELGMNIENVELEMLGKCKKVTISKDDTVVLDGAGEKKAIEERCEQIRSAIELSTSDYDKEKLQER…	181|209	12.6|12.6	-|-	11|13	3|8	6|6	2|2	0.955	---	2	1	-	-	---	---	1	1	-	-	0.805	---	2	1	-	-	---	---	1	1	-	-	gi|460388438|ref|XP_004239874.1|	100	0	gi|460388438|ref|XP_004239874.1|	PREDICTED: chaperonin CPN60, mitochondrial-like [Solanum lycopersicum]	90.54	0	sp|P29197|CH60A_ARATH	Chaperonin CPN60, mitochondrial OS=Arabidopsis thaliana GN=CPN60 PE=1 SV=2	90.71	0	D7L4A9	D7L4A9_ARALL Putative uncharacterized protein OS=Arabidopsis lyrata subsp. lyrata GN=ARALYDRAFT_898985 PE=3 SV=1	SMb21566
28	gi|51511877|gb|AAU05135.1|	ribulose-1,5-bisphosphate carboxylase/oxygenase large subunit [Anisopogon avenaceus]	56346	VGFQAGVKDYKLTYYTPEYETKDTDILAAFRVTPQPGVPPEEAGAAVAAESSTGTWTTVWTDGLTSLDRYKGRCYHIEPVPGEEDQFIAYVAYPLDLFEEGSVTNMFTSIVGNVFGFKALRALRLEDLRIPPTYSKTFQGPPHGIQVERDKLNKYGRPLLGCTIKPKLGLSAKNYGRACYECLRGGLDFTKDDENVNSQPFMRWRDRFVFCAEAIYKAQAETGEIKGHYLNATAGTVDEMIKRAVFARELGVPIVMHDYLTGGFTANTTLAHYCRDNGLLLHIHRAMHAVIDRQKNHGMHFRVLAKALRMSGGDHVHAGTVVGKLEGEREMTLGFVDLLRDDFIEKDRARGVFFTQDWVSMPGVIPVASGGIHVWHMPALTEIFGDDSVLQFGGGTLGH…	649|-	30.4|-	-|-	67|-	1|-	10|-	1|-	---	-	1	-	-	-	---	-	1	-	-	-	---	-	1	-	-	-	---	-	1	-	-	-	gi|51511877|gb|AAU05135.1|	100	0	gi|51511877|gb|AAU05135.1|	ribulose-1,5-bisphosphate carboxylase/oxygenase large subunit [Anisopogon avenaceus]	97.09	0	sp|P05698|RBL_HORVU	Ribulose bisphosphate carboxylase large chain OS=Hordeum vulgare GN=rbcL PE=3 SV=2	100	0	Q537Z5	Q537Z5_9POAL Ribulose-1,5-bisphosphate carboxylase/oxygenase large subunit (Fragment) OS=Anisopogon avenaceus PE=3 SV=1	alr1524
29	gi|21105262|gb|AAM34577.1|	ribulose-1,5-bisphosphate carboxylase/oxygenase large subunit [Isoetes humilior]	34510	GFKAGVKDYRLTYYTPDYKTKDTDILAAFRMTPQPGVPPEEAGAAVAAESSTGTWTTVWTDGLTSLDRYKGRCYDIEPVAGEENQYIAYVAYPLDLFEEGSVTNMFTSIVGNVFGFKALRALRLEDLRIPPAYSKTFQGPPHGIQVERDKLNKYGRPLLGCTIKPKLGLSAKNYGRAVYECLRGGLDFTKDDENVNSQPFMRWRDRFLFVAEAINKSQAETGEIKGHYLNATAGTCEEMMKRVVFARELGVPIVMHDYLT	577|-	20.8|-	1|-	56|-	1|-	5|-	1|-	---	-	-	-	-	-	---	-	-	-	-	-	---	-	-	-	-	-	---	-	-	-	-	-	gi|21105262|gb|AAM34577.1|	100	2e-132	gi|21105262|gb|AAM34577.1|	ribulose-1,5-bisphosphate carboxylase/oxygenase large subunit [Isoetes humilior]	98.08	3e-130	sp|Q31795|RBL_ANTFO	Ribulose bisphosphate carboxylase large chain OS=Anthoceros formosae GN=rbcL PE=2 SV=2	100	2e-131	Q8MGJ3	Q8MGJ3_9TRAC Ribulose bisphosphate carboxylase large chain (Fragment) OS=Isoetes humilior GN=rbcL PE=3 SV=1	alr1524
30	gi|356504189|ref|XP_003520881.1|	PREDICTED: LOW QUALITY PROTEIN: CBL-interacting serine/threonine-protein kinase 9-like [Glycine max]	64960	MSSMKVAKGRILVGKYELGKTIGEGSFAKVKFARNVQNGNYVAIKILDRKHVLRLNMMEQLMKEISTMKLINHPNVVRILEVLASKTKIYIVLEFVDGGELFDKIAANGRLKEDEARNYFQQLINAVDYCHSRGVYHRDLKPENLLDSNGVLKVSDFGLSTYSQKVRXFQPCWIEDELLHTACGTPNYVAPEVLNDRGYVGSTSDIWSCGVILFVLMAGYLPFDEPTHMALYKKIGRAEFSCPSWFSPQAKKLLKHILDPNPLTRIKIPELLEDEWFKKGYKPTSFTEEEDLNVDDVVVAFNESNENLVTERKEKPVSMNAFELICRSQSFNLDSLFEKQTGQVKQETSFTSQCPANEIMFKIEEAAKPLGFNVYKRNYKMKLQGDKSGRKGHLSVATE…	-|21	-|2.4	-|1	-|1	-|1	-|1	-|1	-	---	-	-	-	-	-	---	-	-	-	-	-	---	-	-	-	-	-	---	-	-	-	-	gi|356504189|ref|XP_003520881.1|	100	0	gi|356504189|ref|XP_003520881.1|	PREDICTED: LOW QUALITY PROTEIN: CBL-interacting serine/threonine-protein kinase 9-like [Glycine max]	73.15	0	sp|Q9MAM1|CIPK9_ARATH	CBL-interacting serine/threonine-protein kinase 9 OS=Arabidopsis thaliana GN=CIPK9 PE=1 SV=2	98	0	I1JS31	I1JS31_SOYBN Uncharacterized protein OS=Glycine max PE=4 SV=1	ECU01g0630
31	gi|18418410|ref|NP_568356.1|	molecular chaperone GrpE [Arabidopsis thaliana] >gi|332005075|gb|AED92458.1| molecular chaperone GrpE [Arabidopsis thaliana]	41005	MAGLLKTPSLHLTPTLLHAPSVPFKPFCVSFAGGRNVSVSLSRRASLRSVSSGYPLRLLNLVPFASGEAETTETEVESNEPEETDGAVDVENENASAEEGEAEEEEAAVITALLKSYKEALADNNEGKIAEIEASLKSIEDEKFLLADKVASLSNELSVERDRLIRISADFDNFRKRTERERLNLVSNAQGEVVENLLAVLDNFERAKSQIKVETEGEEKVTNSYQSIYKQFVEILGSLGVIHVETVGKQFDPMLHEAIMREDSAEYEEGIVLEEYRKGFLLGERLLRPSMVKVSAGPGPEKPLEAEGEEATAQGSAEEESSSS	42|40	2.8|2.8	18|18	3|4	3|4	1|1	1|1	---	---	1	-	-	-	---	---	1	-	-	-	---	---	1	-	-	-	---	---	1	-	-	-	gi|18418410|ref|NP_568356.1|	100	2e-124	gi|18418410|ref|NP_568356.1|	molecular chaperone GrpE [Arabidopsis thaliana] >gi|332005075|gb|AED92458.1| molecular chaperone GrpE [Arabidopsis thaliana]	49.32	2e-36	sp|Q8DJB3|GRPE_THEEB	Protein GrpE OS=Thermosynechococcus elongatus (strain BP-1) GN=grpE PE=3 SV=1	100	2e-123	Q94K56	Q94K56_ARATH GrpE protein homolog OS=Arabidopsis thaliana GN=EMB1241 PE=2 SV=1	alr2445
32	gi|15222481|ref|NP_177142.1|	Hypersensitive-induced response protein 2 [Arabidopsis thaliana] >gi|30697929|ref|NP_849870.1| Hypersensitive-induced response protein 2 [Arabidopsis thaliana] >gi|42572051|ref|NP_974116.1| Hypersensitive-induced response protein 2 [Arabidopsis thal	37147	MGQALGCIQVDQSNVAIKETFGKFDEVLEPGCHCLPWCLGSQVAGHLSLRVQQLDVRCETKTKDNVFVTVVASIQYRALAESAQDAFYKLSNTRNQIQAYVFDVIRASVPKLDLDSTFEQKNDIAKTVETELEKAMSHYGYEIVQTLIVDIEPDVHVKRAMNEINAASRMREAASEKAEAEKILQIKRAEGEAESKYLSGMGIARQRQAIVDGLRNSVLAFSESVPGTSSKDVMDMVLVTQYFDTLKEIGASSKSNSVFIPHGPGAVRDIASQIRDGLLQGNSAAE	-|53	-|3.5	-|7	-|2	-|2	-|1	-|1	-	---	-	-	-	-	-	---	-	-	-	-	-	---	-	-	-	-	-	---	-	-	-	-	gi|15222481|ref|NP_177142.1|	100	3e-156	gi|15222481|ref|NP_177142.1|	Hypersensitive-induced response protein 2 [Arabidopsis thaliana] >gi|30697929|ref|NP_849870.1| Hypersensitive-induced response protein 2 [Arabidopsis thaliana] >gi|42572051|ref|NP_974116.1| Hypersensitive-induced response protein 2 [Arabidopsis thaliana] >gi|42572053|ref|NP_974117.1| Hypersensitive-induced response protein 2 [Arabidopsis thaliana] >gi|145327201|ref|NP_001077802.1| Hypersensitive-…	100	1e-156	sp|Q9CAR7|HIR2_ARATH	Hypersensitive-induced response protein 2 OS=Arabidopsis thaliana GN=HIR2 PE=1 SV=1	99.3	3e-154	D7KXK6	D7KXK6_ARALL Band 7 family protein OS=Arabidopsis lyrata subsp. lyrata GN=ARALYDRAFT_315987 PE=4 SV=1	SP2156
33	gi|379035767|gb|AFC81173.1|	ribulose-1,5-bisphosphate carboxylase/oxygenase large subunit, partial (chloroplast) [Epilobium palustre]	22926	SVGFKAGVKDYKXNYYTPEYETKDTDILAAFRVTPQPGVPPEEAGAAVAAESSTGTWTTVWTDGLTSLDRYKGRCYHIEPVAGEENQYICYVAYPLDLFEEGSVTNMFTSIVGNVFGFKALRALRLEDLRIPVAYVKTFQGPPHGIQVERDKLNKYGRPLLGCTIKPKLGLSA	270|-	41.0|-	-|-	29|-	2|-	5|-	2|-	---	-	-	-	-	-	---	-	-	-	-	-	---	-	-	-	-	-	---	-	-	-	-	-	gi|379035767|gb|AFC81173.1|	100	2e-86	gi|379035767|gb|AFC81173.1|	ribulose-1,5-bisphosphate carboxylase/oxygenase large subunit, partial (chloroplast) [Epilobium palustre]	98.27	4e-86	sp|B0Z5B1|RBL_OENPA	Ribulose bisphosphate carboxylase large chain OS=Oenothera parviflora GN=rbcL PE=3 SV=1	100	2e-85	H9ALT7	H9ALT7_9MYRT Ribulose-1,5-bisphosphate carboxylase/oxygenase large subunit (Fragment) OS=Epilobium palustre GN=rbcL PE=4 SV=1	alr1524
34	gi|3334286|sp|O23924.1|PALY_DIGLA	RecName: Full=Phenylalanine ammonia-lyase >gi|2631995|emb|CAA05251.1| phenylalanine ammonia lyase [Digitalis lanata]	90422	MAAVVENGHHGNNGFCVKQNDPLNWVAAAEELKGSHLDEVKRMVEEFRKTVVKLGGETLTISQVAAIAARDNEVAVQLAESSRAGVKASSDWVMESMNKGTDSYGVTTGFGATSHRRTKQGGALQKELIRFLNAGIFGNGTESTHTLPHSATRAAMLVRINTLLQGYSGIRFEILETITKFLNHNITPCLPLRGTITASGDLVPLSYIAGLLTGRPNSKAVGPNGESLNAEQAFKLAGANSGLFFELQPKEGLALVNGTAVGSGLASIALYEANILSLLAEVMSAVFAEVMNGKPEFTDHLTHKLKHHPGQIEAAAIMEHILDGSSYVKAAQKMHEMDPLQKPKQDRYALRTSPQWLGPQIEVIRTATKMIEREINSVNDNPLIDVSRNKALHGGNFQG…	-|27	-|1.3	-|2	-|1	-|1	-|1	-|1	-	---	-	-	-	-	-	---	-	-	-	-	-	---	-	-	-	-	-	---	-	-	-	-	gi|3334286|sp|O23924.1|PALY_DIGLA	100	0	gi|3334286|sp|O23924.1|PALY_DIGLA	RecName: Full=Phenylalanine ammonia-lyase >gi|2631995|emb|CAA05251.1| phenylalanine ammonia lyase [Digitalis lanata]	100	0	sp|O23924|PALY_DIGLA	Phenylalanine ammonia-lyase OS=Digitalis lanata PE=2 SV=1	92.54	0	H6WP40	H6WP40_PERFR Phenylalanine ammonia-lyase OS=Perilla frutescens GN=PAL PE=2 SV=1	RSp0365
35	gi|134035512|gb|ABO47744.1|	polygalacturonase-inhibiting protein [Gossypium hirsutum]	44927	MGIFSFNAIALAFLLAIISGAVNACPSSDREALLALSSSLKEPYLGIFDSWKGTDCCSNWYGISCDPTTHRVTDVSLRGESEDPILQKTGHSSSGYMTGTINPSICQLDRVTTLIIADWKGIAGEIPSCLASLPNLRVLDLIGNSLSGKIPDQIGNLQKLTVLNLADNKINGEIPSSIVQLSSLKHLDLSNNLLTGEVPANFGNLKMLSRALLSGNQLTGTIPISISNMYRLADLDLSRNKIQGQIPAQLGKMKVLATLDLGSNMLTGEIPPAVLGSTGLGILNLSRNSLEGNIPDVFGPKSYFMALDLSFNNLKGAVPGSLSSAKFVGHLDLSHNHLCGTIPVGTPFDHLEASSFDSNDCLCGNPLKTC	38|37	3.8|6.8	-|-	1|2	1|2	1|2	1|2	---	---	-	-	-	-	---	---	-	-	-	-	---	---	-	-	-	-	---	---	-	-	-	-	gi|134035512|gb|ABO47744.1|	100	0	gi|134035512|gb|ABO47744.1|	polygalacturonase-inhibiting protein [Gossypium hirsutum]	62.14	2e-119	sp|Q00874|DR100_ARATH	DNA-damage-repair/toleration protein DRT100 OS=Arabidopsis thaliana GN=DRT100 PE=2 SV=2	100	0	A9PL23	A9PL23_GOSHI Polygalacturonase-inhibiting protein OS=Gossypium hirsutum GN=PGIPL PE=2 SV=1	alr0124_1
36	gi|268527763|gb|ACZ06067.1|	beta-hydroxyacyl-ACP dehydratase [Arachis hypogaea]	27476	MAASALSNAILSPVSPPSQSVSSKPKTSLVKFPNPRSKPFIALCSSDSDAAPNHDATPIELRYPAFPTVMDINQIREILPHRFPFLLVDRVIEYNPGKSAVAIKNVTINDNFFPGHFPERPIMPGVLMVEAMAQVGGLVMLQPDVGGSRENFFFAGIDKVRFRKPVIAGDTLVMRMTLIKLQKRFGIAKMEGKAYVGGEVVCEGEFLMATGSGGSE	-|205	-|16.7	-|3	-|11	-|11	-|3	-|3	-	0.967	-	4	-	-	-	2.063	-	3	-	-	-	0.915	-	4	-	-	-	1.721	-	3	-	-	gi|268527763|gb|ACZ06067.1|	100	1e-110	gi|268527763|gb|ACZ06067.1|	beta-hydroxyacyl-ACP dehydratase [Arachis hypogaea]	58.62	1e-39	sp|Q2JTA0|FABZ_SYNJA	3-hydroxyacyl-[acyl-carrier-protein] dehydratase FabZ OS=Synechococcus sp. (strain JA-3-3Ab) GN=fabZ PE=3 SV=1	100	1e-109	E6Y9A5	E6Y9A5_ARAHY Beta-hydroxyacyl-ACP dehydratase OS=Arachis hypogaea GN=HD PE=2 SV=1	alr2271
37	gi|2058282|emb|CAA66045.1|	atranbp1a [Arabidopsis thaliana]	35692	MATNEPEHEHRDEEEAGANEDEDTGAQVAPIVRLEEVAVTTGEEDEDAVLDLKSKLYRFDKDANQWKERGAGTVKFLKHKNTGKIRLVMRQSKTLKICANHFVKSGMSVQEHVGNEKSCVWHARDFADGELKDELFCIRFASIENCKTFMQKFKEVAESEEEKEESKDAADTAGLLEKLTVEETKTEEKTEAKLVETAKTEVKAEEKKESEAEKSGEAKKTEESGSLNIRSVII	-|37	-|4.7	-|2	-|1	-|1	-|1	-|1	-	---	-	-	-	-	-	---	-	-	-	-	-	---	-	-	-	-	-	---	-	-	-	-	gi|2058282|emb|CAA66045.1|	100	6e-73	gi|15222310|ref|NP_172194.1|	Ran-binding protein 1-a [Arabidopsis thaliana] >gi|75264036|sp|Q9LMK7.1|RBP1A_ARATH RecName: Full=Ran-binding protein 1 homolog a; AltName: Full=Ran-binding protein siRanBP >gi|8954032|gb|AAF82206.1|AC067971_14 Identical to atranbp1a from Arabidopsis thaliana gb|X97377. It contains a RanBP1 domain PF|00638. ESTs gb|H76544, gb|H76880, gb|AA389814, gb|AA712542, gb|T88156, gb|N65434 and gb|AA712288 …	100	2e-73	sp|Q9LMK7|RBP1A_ARATH	Ran-binding protein 1 homolog a OS=Arabidopsis thaliana GN=RANBP1A PE=1 SV=1	99.21	2e-69	D7KGZ3	D7KGZ3_ARALL Putative uncharacterized protein OS=Arabidopsis lyrata subsp. lyrata GN=ARALYDRAFT_334013 PE=4 SV=1	YDR002w
38	gi|118488685|gb|ABK96153.1|	unknown [Populus trichocarpa]	85090	MYASKFGVDESKMMERLWGENFFDPATKKWTTKNTGSATCKRGFVQFCYEPIKQIIKTCMNDQKDKLWPMLQKLGVVMKSDEKDLMGKPLMKRVMQTWLPASTALLEMMIFHLPSPATAQRYRVENLYEGPLDDAYANAIRNCDPNGPLMLYVSKMIPASDKGRFFAFGRVFAGKVTTGLKVRIMGPNYVPGEKKDLYVKSVQRTVIWMGKRQETVEDVPCGNTVALVGLDQFITKNATLTNEKEVDAHPIRAMKFSVSPVVRVAVQCKVASDLPKLVEGLKRLAKSDPMVVCSIEESGEHIIAGAGELHLEICLKDLQDDFMGGAEIIKSDPVVSFRETVIDKSCRVVMSKSPNKHNRLYMEARPMEEGLAEAIDDGRIGPRDDPKIRGKILSEEFGW…	234|402	11.7|14.3	2|2	13|19	4|3	6|7	2|1	---	0.44	1	2	-	-	---	0.621	1	2	-	-	---	0.998	1	2	-	-	---	0.259	1	2	-	*	gi|118488685|gb|ABK96153.1|	100	0	gi|224094244|ref|XP_002310106.1|	predicted protein [Populus trichocarpa] >gi|222853009|gb|EEE90556.1| predicted protein [Populus trichocarpa]	91.23	0	sp|O23755|EF2_BETVU	Elongation factor 2 OS=Beta vulgaris PE=2 SV=1	100	0	A9PIF0	A9PIF0_POPTR Putative uncharacterized protein OS=Populus trichocarpa PE=2 SV=1	SPCP31B10.07
39	gi|2276346|emb|CAA03940.1|	Glucose-6-phosphate dehydrogenase [Spinacia oleracea]	42472	IDHYLGKELVENLSVLHFSNLVFEPLWSRNYIRNVQLIFSEDFGTEGRGGYFDNYGIIRDIMQNHLLQILALFAMETPVSLDAEDIRNEKVKVLRSMKPLKLQDVVVGQYKGHSKGNKSYSGYTDDPTVPNNSVTPAFAAAALFIDNARWDGVPFLMKAGKALHTKRAEIRVQFRHVPGNLYKKTFGTDLEKATNELVLRVQPDEAIYLKINNKVPGLGMRLDRTDLNLCYSTRYRGEIPDAYERLLLDAIEGERRLFIRSDELDAAWSLFTPLLKELEEKKVAPELYPYGSRGPVGAHYLAAKHNVRWGDLSGEDS	39|19	3.2|3.2	55|55	1|1	1|1	1|1	1|1	---	---	-	-	-	-	---	---	-	-	-	-	---	---	-	-	-	-	---	---	-	-	-	-	gi|2276346|emb|CAA03940.1|	100	0	gi|2276346|emb|CAA03940.1|	Glucose-6-phosphate dehydrogenase [Spinacia oleracea]	98.74	0	sp|O24357|G6PDC_SPIOL	Glucose-6-phosphate 1-dehydrogenase, chloroplastic OS=Spinacia oleracea GN=G6PD PE=2 SV=1	100	0	O24358	O24358_SPIOL Glucose-6-phosphate 1-dehydrogenase (Fragment) OS=Spinacia oleracea GN=G6PD PE=2 SV=1	YNL241c
40	gi|449434628|ref|XP_004135098.1|	PREDICTED: putative DNA repair protein RAD23-3-like [Cucumis sativus]	47191	MKIFVKTLKGSHFEIEVQPADTVADVKKNIETVQGADVYPAAQQMLIHQGKVLKDSSTLEENKVAENSFIVIMLTKNKSSSGGTSSTTHAAPVAKAPQSTAPAPAATPVSTTEVPLPTSAPPASVTASSPPAPSPTPVPVPAPAPAPTPTPTPTPAAAPAPSLATTVLPDADVYSQAASNLVAGSNLEETVQQILDMGEGVWDRDTVVRALRAAYNNPERAVDYLYSGIPEQVEAPPARVPSTVQASNPSAQPAQPAQPASAPSSTGPNANPLDLFPQGLPNLGSGAVGSGSLDFLRNSPQFQALRAMVRANPQILQPMLQELGKQNPQLIRLIQDHQPDFLRLINEPLEGEGNILGQLAEAMPQAITVTPEEREAIQRVSLPSLLLDNQNCFRENSIY…	33|74	4.7|4.7	1|1	1|4	1|4	1|1	1|1	---	---	-	1	-	-	---	---	-	1	-	-	---	---	-	1	-	-	---	---	-	1	-	-	gi|449434628|ref|XP_004135098.1|	100	9e-123	gi|449434628|ref|XP_004135098.1|	PREDICTED: putative DNA repair protein RAD23-3-like [Cucumis sativus]	83.33	2e-32	sp|Q84L31|RD23C_ARATH	Putative DNA repair protein RAD23-3 OS=Arabidopsis thaliana GN=RAD23-3 PE=2 SV=2	87.84	2e-30	Q1KUV7	Q1KUV7_9ROSI Putative uncharacterized protein OS=Cleome spinosa PE=4 SV=1	SPBC2D10.12
41	gi|461465|sp|Q05214.1|ACT1_TOBAC	RecName: Full=Actin >gi|22609|emb|CAA45149.1| actin [Nicotiana tabacum]	48633	MADGEDIQPLVCDNGTGMVKAGFAGDDAPRAVFPSIVGRPRHTGVMVGMGQKDAYVGDEAQSKRGILTLKYPIEHGIVSNWDDMEKIWHHTFYNELRVAPEEHPVLLTEAPLNPKANREKMTQIMFETFNTPAMYVAIQAVLSLYASGRTTGIVLDSGDGVSHTVPIYEGYALPHAILRLDLAGRDLTDHLMKILTERGYSFTTTAEREIVRDVKEKLSYIALDFEQEMETSKTSSSVEKSYELPDGQVITIGAERFRCPEVLFQPSMIGMEAAGIHETTYNSIMKCDVDIRKDLYGKIVLSGGSTMFPGIADRMSKEITALAPSSMKIKVVAPPERKYSVWIGGSILASLSTFQQMWIAKAEYDESGPSIVHRKCF	-|302	-|26.0	-|-	-|16	-|1	-|7	-|1	-	---	-	-	-	-	-	---	-	-	-	-	-	---	-	-	-	-	-	---	-	-	-	-	gi|461465|sp|Q05214.1|ACT1_TOBAC	100	0	gi|461465|sp|Q05214.1|ACT1_TOBAC	RecName: Full=Actin >gi|22609|emb|CAA45149.1| actin [Nicotiana tabacum]	100	0	sp|Q05214|ACT1_TOBAC	Actin OS=Nicotiana tabacum PE=3 SV=1	99.47	0	B5M4V6	B5M4V6_TOBAC Actin OS=Nicotiana tabacum PE=3 SV=1	SPBC32H8.12c
42	gi|449433764|ref|XP_004134667.1|	PREDICTED: uncharacterized protein LOC101216458 [Cucumis sativus] >gi|449479238|ref|XP_004155545.1| PREDICTED: uncharacterized protein LOC101228620 [Cucumis sativus]	23864	MTSSILLNLQFLSITDSRFRSYSLSNHLSSSPHLICSLTRPRISRLIKVTAVSSMEVEQGGESAPVDSTVPPMKLLFVEMGVGYDQHGQDVTAAAMRACRDAISSNSIPAFRRGSIPGVSFGEMKLQIKLGVPHSLQQSLDLEKVKSVFPYGKILNVEVVDGGLICSSGVHVEEMGDKNDDCYIVNAAVYVGY	-|63	-|12.4	-|-	-|2	-|2	-|2	-|2	-	---	-	1	-	-	-	---	-	1	-	-	-	---	-	1	-	-	-	---	-	1	-	-	gi|449433764|ref|XP_004134667.1|	100	2e-99	gi|449433764|ref|XP_004134667.1|	PREDICTED: uncharacterized protein LOC101216458 [Cucumis sativus] >gi|449479238|ref|XP_004155545.1| PREDICTED: uncharacterized protein LOC101228620 [Cucumis sativus]	-	-	-	-	92.68	7e-61	C6T3H4	C6T3H4_SOYBN Uncharacterized protein OS=Glycine max GN=Gma.24911 PE=2 SV=1	-
43	gi|470110683|ref|XP_004291601.1|	PREDICTED: ferredoxin-3, chloroplastic-like isoform 1 [Fragaria vesca subsp. vesca] >gi|470110685|ref|XP_004291602.1| PREDICTED: ferredoxin-3, chloroplastic-like isoform 2 [Fragaria vesca subsp. vesca]	20071	MSTMTTVNVPSRCMLRNAPKTRFTSSIIKFSSPLGSVKTLSKSFGLKASASSRTSMAAYKVKLIGPDGEENEFDAPDDSYILDSAENAGVELPYSCRAGACSTCAGKMVAGSVDQSDGSFLDDNQMKEGYLLTCVSYPSSDCVIHTHKESELY	35|66	13.1|13.1	-|-	2|1	2|1	1|1	1|1	---	---	-	1	-	-	---	---	-	1	-	-	---	---	-	1	-	-	---	---	-	1	-	-	gi|470110683|ref|XP_004291601.1|	100	2e-85	gi|470110683|ref|XP_004291601.1|	PREDICTED: ferredoxin-3, chloroplastic-like isoform 1 [Fragaria vesca subsp. vesca] >gi|470110685|ref|XP_004291602.1| PREDICTED: ferredoxin-3, chloroplastic-like isoform 2 [Fragaria vesca subsp. vesca]	76.29	4e-41	sp|P14936|FER1_RAPSA	Ferredoxin, root R-B1 OS=Raphanus sativus PE=1 SV=1	84.69	2e-43	A5C2H2	A5C2H2_VITVI Putative uncharacterized protein OS=Vitis vinifera GN=VITISV_002047 PE=4 SV=1	ssl0020
44	gi|449445906|ref|XP_004140713.1|	PREDICTED: d-3-phosphoglycerate dehydrogenase, chloroplastic-like [Cucumis sativus] >gi|449501685|ref|XP_004161437.1| PREDICTED: d-3-phosphoglycerate dehydrogenase, chloroplastic-like [Cucumis sativus]	74604	MAASASPTLRTPSLRNSLFSSLSSKLPLPSAFSVNLRPRSVAAPRFVVLVSASLNAKPTVLVAEKLGEAGLDLLKEFANVDCSYNLSPEELCTKISLCDALIVRSGTKVSREVFESSGGRLKVVGRAGVGIDNVDLAAATEHGCLVVNAPTANTVAAAEHGIALLTAMARNVAQADASVKAGKWQRNKYVGVSLVGKTLAVMGFGKVGSEVARRAKGLGMHVIAHDPYAPADRARAIGVELVGFEEAIATADFISLHMPLTPATSKILNDENFAKMKKGVRIVNVARGGVIDEEALVRALDAGIVAQAALDVFTVEPPPKDSKLIQHENVTVTPHLGASTMEAQEGVAVEIAEAVVGALKGELAATAVNAPMVPAEVLTELKPFVELAEKLGRLAVQLV…	-|71	-|8.3	-|-	-|4	-|3	-|4	-|3	-	---	-	1	-	-	-	---	-	1	-	-	-	---	-	1	-	-	-	---	-	1	-	-	gi|449445906|ref|XP_004140713.1|	100	0	gi|449445906|ref|XP_004140713.1|	PREDICTED: d-3-phosphoglycerate dehydrogenase, chloroplastic-like [Cucumis sativus] >gi|449501685|ref|XP_004161437.1| PREDICTED: d-3-phosphoglycerate dehydrogenase, chloroplastic-like [Cucumis sativus]	78.64	0	sp|O04130|SERA_ARATH	D-3-phosphoglycerate dehydrogenase, chloroplastic OS=Arabidopsis thaliana GN=At1g17745 PE=1 SV=2	93.69	0	B9RYA3	B9RYA3_RICCO D-3-phosphoglycerate dehydrogenase, putative OS=Ricinus communis GN=RCOM_0811570 PE=3 SV=1	MJ1018
45	gi|350536711|ref|NP_001234005.1|	glyoxisomal malate dehydrogenase [Solanum lycopersicum] >gi|52139820|gb|AAU29200.1| glyoxisomal malate dehydrogenase [Solanum lycopersicum]	44699	MQPSGAEVHQRIARISAHLYPSNPQMGDGSILERTNCRAKGGAAGFKVAILGAAGGIGQPLAMLMKMNPLVSVLHLYDVVNAPGVTADISHMDTGAVVRGFLGQSELEGALTGMDLVIIPAGIPRKPGMTRDDLFKINAGIVRTLCEGIAKCCPNAIVNLISNPVNSTVPIAAEVFKKAGTYDPKKLLGVTSLDVVRANTFVAEVLGLDPREVEVPVVGGHAGVTILPLLSQVKPPCSFTHEETEYLTKRIQDGGTEVVEAKKGAGSATLSMAYAAVKFADVCLKGLRGDAGVVACAFVASQVTELPFFASKVRLGRTGAEEVYQLGPLNEYERIGLEKAKKELAESIQKGISFIRN	279|318	21.6|18.2	-|-	10|10	4|2	5|4	3|2	0.893	---	2	1	-	-	1.689	---	2	1	-	-	1.447	---	2	1	-	-	1.963	---	2	1	-	-	gi|350536711|ref|NP_001234005.1|	100	0	gi|350536711|ref|NP_001234005.1|	glyoxisomal malate dehydrogenase [Solanum lycopersicum] >gi|52139820|gb|AAU29200.1| glyoxisomal malate dehydrogenase [Solanum lycopersicum]	87.08	3e-179	sp|P46488|MDHG_CUCSA	Malate dehydrogenase, glyoxysomal OS=Cucumis sativus GN=MDHG PE=2 SV=1	100	0	Q645M9	Q645M9_SOLLC Glyoxisomal malate dehydrogenase OS=Solanum lycopersicum GN=gMDH PE=2 SV=1	YPO3516
46	gi|34863549|gb|AAQ82947.1|	maturase [Valeriana jatamansi]	43108	MEEFKRYLKRSGSEQHYFLYPLIFQEYIYALAHDHDLNRAPLLENVGYXNKYSLLVVKRLITRTNQNAFWRRHKSFDSQRISEGFSIIVEIPFSLRFLSFLETKGRVKSRNLRSIHSVFPFLEDKFSHLNYVLVYLIPYPAHLEILVQVLRYWVKDVPSLHLLRVFLHNWTSSFIPKKVSPFFSKRKKRFFFFLYNSYLCEYESILVFVRNQSSHLQSTAFGALVERIYLYEKLELXVEFFAKDFQVNLWLFKDPLMHYVRYQGKSIFSSKDSVLFMHKWKDYLIRFCQRHFYQYFQP	-|22	-|3.4	-|-	-|1	-|1	-|1	-|1	-	---	-	-	-	-	-	---	-	-	-	-	-	---	-	-	-	-	-	---	-	-	-	-	gi|34863549|gb|AAQ82947.1|	100	3e-157	gi|34863549|gb|AAQ82947.1|	maturase [Valeriana jatamansi]	66.56	2e-100	sp|Q8WKM6|MATK_HYDMC	Maturase K OS=Hydrangea macrophylla GN=matK PE=3 SV=1	100	3e-156	Q6W5J1	Q6W5J1_9DIPS Maturase K (Fragment) OS=Valeriana jatamansi GN=matK PE=3 SV=1	-
47	gi|194476498|ref|YP_002048677.1|	low affinity sulfate transporter [Paulinella chromatophora] >gi|171191505|gb|ACB42467.1| low affinity sulfate transporter [Paulinella chromatophora]	63002	MLKRISSQYFIGDLFGGITAAVIALPMALAFGIASGIGAAAGLWGAVIVGLVAALFGGTASLISEPTGPMTVMFTAVAANLTAETVNYDNGIAMAFTVVIIAGLFQIILGLCKLGRYITMMPYMVISGFMSGIGMILIILQIPSCLGQAMPAGGIIGILQSLPSLINQTRVPDAILALTTIVILWITPAKIKRICPPQLLALLTGTFLSLLVFKNTDIRTIGIIPGGFPNFIQPHVEFSHLRLMLIDGSILGMLGSIDALLTSVVADSLTRTEHNSNKELVGQGLGNIVSGLFGGLPGAGATMGTVVNIQAGGRTPLSGIIRALILMIVILGAGNLAAGIPLAVLSAIALKVGVDIVDWSFFLRAHHLSTKGAIIMYSVTAMTVLVDVMAAVGVGVFVA…	14|-	1.5|-	-|-	1|-	1|-	1|-	1|-	---	-	-	-	-	-	---	-	-	-	-	-	---	-	-	-	-	-	---	-	-	-	-	-	gi|194476498|ref|YP_002048677.1|	100	0	gi|194476498|ref|YP_002048677.1|	low affinity sulfate transporter [Paulinella chromatophora] >gi|171191505|gb|ACB42467.1| low affinity sulfate transporter [Paulinella chromatophora]	34.88	5e-13	sp|P0AFR2|YCHM_ECOLI	Putative sulfate transporter YchM OS=Escherichia coli (strain K12) GN=ychM PE=1 SV=2	100	0	B1X3E8	B1X3E8_PAUCH Low affinity sulfate transporter OS=Paulinella chromatophora GN=PCC_0004 PE=4 SV=1	sll0834
48	gi|15226314|ref|NP_180367.1|	chaperonin-60alpha [Arabidopsis thaliana] >gi|2506276|sp|P21238.2|CPNA1_ARATH RecName: Full=Chaperonin 60 subunit alpha 1, chloroplastic; Short=CPN-60 alpha 1; AltName: Full=Protein SCHLEPPERLESS; AltName: Full=RuBisCO large subunit-binding protein	73765	MASANALSSASVLCSSRQSKLGGGNQQQGQRVSYNKRTIRRFSVRANVKEIAFDQHSRAALQAGIDKLADCVGLTLGPRGRNVVLDEFGSPKVVNDGVTIARAIELPNAMENAGAALIREVASKTNDSAGDGTTTASILAREIIKHGLLSVTSGANPVSLKRGIDKTVQGLIEELQKKARPVKGRDDIRAVASISAGNDDLIGSMIADAIDKVGPDGVLSIESSSSFETTVEVEEGMEIDRGYISPQFVTNPEKLLAEFENARVLITDQKITAIKDIIPILEKTTQLRAPLLIIAEDVTGEALATLVVNKLRGVLNVVAVKAPGFGERRKAMLQDIAILTGAEYLAMDMSLLVENATIDQLGIARKVTISKDSTTLIADAASKDELQARIAQLKKELFE…	381|303	15.5|17.1	2|2	20|14	3|3	7|7	1|1	0.771	0.868	3	2	-	-	1.695	0.715	3	2	-	-	1.377	1.5	3	2	-	-	1.271	0.885	3	2	-	-	gi|15226314|ref|NP_180367.1|	100	0	gi|15226314|ref|NP_180367.1|	chaperonin-60alpha [Arabidopsis thaliana] >gi|2506276|sp|P21238.2|CPNA1_ARATH RecName: Full=Chaperonin 60 subunit alpha 1, chloroplastic; Short=CPN-60 alpha 1; AltName: Full=Protein SCHLEPPERLESS; AltName: Full=RuBisCO large subunit-binding protein subunit alpha 1; Flags: Precursor >gi|1223910|gb|AAA92061.1| chaperonin-60 alpha subunit [Arabidopsis thaliana] >gi|31711734|gb|AAP68223.1| At2g28000 …	100	0	sp|P21238|CPNA1_ARATH	Chaperonin 60 subunit alpha 1, chloroplastic OS=Arabidopsis thaliana GN=CPN60A1 PE=1 SV=2	97.67	0	D7LIG5	D7LIG5_ARALL CPN60A OS=Arabidopsis lyrata subsp. lyrata GN=ARALYDRAFT_481708 PE=3 SV=1	alr1896
49	gi|312231978|gb|ADQ53450.1|	plastid thioredoxin M precursor [Nicotiana tabacum]	24168	MAGVLEMISVPRASALPSSSLAPVAGSSFSSPRSSVRFSQFRGLKIQSTRSSVSTTSCSKIIPGRARIVCEAQNTALEVGAVNDKTWKSLVVESDIPVLVEFWAPWCGPCRMIHPVIDELAKEYAGKLKFFKLNTDESPSTATELGIRSIPTVMIFKNGEKKDAVIGAVPKSTLTTCIEKFL	91|174	19.8|14.8	-|-	5|7	5|7	3|2	3|2	2.169	1.754	3	6	*	-	1.364	1.285	3	5	-	-	0.842	0.985	3	6	-	-	2.24	1.476	3	5	-	-	gi|312231978|gb|ADQ53450.1|	100	2e-69	gi|312231978|gb|ADQ53450.1|	plastid thioredoxin M precursor [Nicotiana tabacum]	65.83	3e-45	sp|Q9SEU6|TRXM4_ARATH	Thioredoxin M4, chloroplastic OS=Arabidopsis thaliana GN=At3g15360 PE=1 SV=2	100	2e-68	E5L8B5	E5L8B5_TOBAC Plastid thioredoxin M (Precursor) OS=Nicotiana tabacum PE=2 SV=1	RC0002
50	gi|159459932|gb|ABW96363.1|	glutathione reductase [Ipomoea batatas]	63241	MARKMLNDGEMNKPSEEEEHYDFDLFVIGAGSGGVRAARFSAQYGAKVAVCELPFHPISSEVSGGVGGTCVIRGCVPKKILVYGANFGPELEDARNYGWEVNERPNFNWKTLLHKRTEEIVRLNGIYKRLLSNVKLFEGEGRVIGPNEVEVIQLDGTKISYSAKNILIATGSRAQRIAIPGQELAITSDEALSLEDLPRRVVILGGGYIAVEFASIWRGMGAKVDLCFRKELPLSGFDDEMRAVVARNLEGRGINMHPCTTLTELAKTEDGIRARTDHGEDLLADVVLFATGRTPNSKRLNLEAVGVELDKTGAVKVDEFSRTNIPSIWAIGDVTNRMNLTPVALMEGTFFAKTVFAGEPTKPDYTHIPCAVFCIPPLSVVGLSEEEAIEKANGDIAVY…	-|45	-|5.5	-|-	-|3	-|3	-|2	-|2	-	---	-	-	-	-	-	---	-	-	-	-	-	---	-	-	-	-	-	---	-	-	-	-	gi|159459932|gb|ABW96363.1|	100	0	gi|159459932|gb|ABW96363.1|	glutathione reductase [Ipomoea batatas]	81.5	0	sp|Q43154|GSHRP_SPIOL	Glutathione reductase, chloroplastic (Fragment) OS=Spinacia oleracea PE=2 SV=1	100	0	E3NYI5	E3NYI5_IPOBA Glutathione reductase OS=Ipomoea batatas PE=2 SV=1	CC2302
51	gi|224085421|ref|XP_002307570.1|	hypothetical protein POPTRDRAFT_818640 [Populus trichocarpa] >gi|118488107|gb|ABK95873.1| unknown [Populus trichocarpa] >gi|222857019|gb|EEE94566.1| hypothetical protein POPTRDRAFT_818640 [Populus trichocarpa]	34682	MASTSCFLHHHALTTPARSTPSSQRQVANLKPTQLACRAQKQAVQEEDNGAVSRRLALTVLIGAAALGSKVAPADAAYGESANIFGKPKTDTDFLPYNGDGFKLSVPSKWNPSKEREFPGQVLRYEDNFDATSNVSVMVIPTDKKSITDYGSPEEFLSKVDFLLGKQSSLFATASEGGFDPNTVATANILETSTPVVGGKQYFFLSVLTRTADGDEGGKHQLITATVKDGKLYICKAQAGDKRWFKGARKFVESTASSFSVA	68|101	11.1|11.1	-|-	4|6	2|4	2|2	1|1	0.332	0.488	2	2	*	*	0.922	1.198	2	3	-	-	1.919	1.322	2	2	-	-	0.528	0.658	2	3	-	-	gi|224085421|ref|XP_002307570.1|	100	7e-153	gi|224085421|ref|XP_002307570.1|	hypothetical protein POPTRDRAFT_818640 [Populus trichocarpa] >gi|118488107|gb|ABK95873.1| unknown [Populus trichocarpa] >gi|222857019|gb|EEE94566.1| hypothetical protein POPTRDRAFT_818640 [Populus trichocarpa]	80.8	2e-55	sp|O49344|PSBP2_ARATH	Putative oxygen-evolving enhancer protein 2-2 OS=Arabidopsis thaliana GN=PSBP2 PE=5 SV=3	100	7e-152	A9PHM0	A9PHM0_POPTR Putative uncharacterized protein OS=Populus trichocarpa GN=POPTRDRAFT_818640 PE=2 SV=1	-
52	gi|116794349|gb|ABK27107.1|	unknown [Picea sitchensis]	37523	MVHCFHLAGFPKGLISCVTGKGSEIGDFLTMHPGIGCITFTGGDTGIAISKKAGMIPLQMELGGKDACIILDDADLDLAAANVVKGGFSYSGQRCTAVKVVLVMESVADTIVEKVNAKVAKMTVGPPEENCEITPVVTESSANFIEGLVMDAKQKGAKLCQEYKREGNLIWPLLVDHVRPDMRLAWEEPFGPVLPVIRINSVEEGIHHCNASNFGLQGCIFTKDINKAIMISDAMETGTVQINSAPARGPDHFPFQGLRDSGIGSQGITNSILMMTKVKSTVINLPTPSFTMG	-|226	-|21.8	-|-	-|9	-|7	-|4	-|2	-	1.061	-	6	-	-	-	1.281	-	6	-	-	-	1.379	-	7	-	-	-	1.694	-	6	-	*	gi|116794349|gb|ABK27107.1|	100	3e-159	gi|116794349|gb|ABK27107.1|	unknown [Picea sitchensis]	89.76	3e-150	sp|P93338|GAPN_NICPL	NADP-dependent glyceraldehyde-3-phosphate dehydrogenase OS=Nicotiana plumbaginifolia GN=GAPN PE=2 SV=1	100	3e-158	A9P2J6	A9P2J6_PICSI Putative uncharacterized protein OS=Picea sitchensis PE=2 SV=1	SP1119
53	gi|5833889|gb|AAD53728.1|	ribulose-1,5-bisphosphate carboxylase/oxygenase large subunit [Achimenes skinneri] >gi|5833904|gb|AAD53733.1| ribulose-1,5-bisphosphate carboxylase/oxygenase large subunit [Henckelia albomarginata]	59438	ETKASVGFKTGVKEYKLTYYTPEYQTKDTDILAAFRVTPQPGVPPEEAGGAVAAKSSTGTWTTVWTDGLTSLDRYKGRCYHIEPVPGEADQYICYVAYPLDLFEEGSVTNMFTSIVGNVFGFKALHALRLEDLRIPTAYVKTFQGPPHGIQVERDKLNKYGRPLLGCTIKPKLGLSAKNYGRAVYECLRGGLDFTKDDENVNSQPFMRWRDRFLFCAEALYKAQAETGEIKGHYLNATAGTCEEMMKRAVFARELGVLIVMHDYLTGGFTANTSLAHYCRDNGLLLHIHRAMHAVIDRQKNHGMHFRVLAKALRMSGGDHIHAGTVVGKLEGERDXTLGFVDLLRDDFIEKDRSRGIYFTQDWVSLPGVIPVASGGIHVWHMPALTEIFGDDAVLQFGG…	-|1411	-|20.0	-|-	-|116	-|1	-|10	-|1	-	---	-	1	-	-	-	---	-	-	-	-	-	---	-	1	-	-	-	---	-	-	-	-	gi|5833889|gb|AAD53728.1|	100	0	gi|5833889|gb|AAD53728.1|	ribulose-1,5-bisphosphate carboxylase/oxygenase large subunit [Achimenes skinneri] >gi|5833904|gb|AAD53733.1| ribulose-1,5-bisphosphate carboxylase/oxygenase large subunit [Henckelia albomarginata]	97.17	0	sp|O98664|RBL_KIGAF	Ribulose bisphosphate carboxylase large chain (Fragment) OS=Kigelia africana GN=rbcL PE=3 SV=1	100	0	Q9TKI4	Q9TKI4_9LAMI Ribulose 1,5-bisphosphate carboxylase large subunit (Fragment) OS=Achimenes skinneri PE=3 SV=1	alr1524
54	gi|20792|emb|CAA41406.1|	Type II chlorophyll a /b-binding protein [Pinus sylvestris]	33778	MASGAAVVCASSSVTAAVVVAPSSSSQKTILANNVGAAKASFLVGRAVSLRQTKAAMPRRAAVTVSQAVQTERPLWFPGNTPPPWLDGSLPGDFGFDPLGLGSDPETLKWMVQAELVHCRWAMLGAAGIFIPELCTKLGILNTPSWYTAGELEYFTDKTTLFVVEMIFLGWAEGRRWADILEPGSVNTDPIFPNNKLTGTDVGYPGGLWFDPLGWGSGSPEKIKELRTKEIKNGRLAMLAVMGAWFQAEYTGTGPIDNLLAHLADPGHATIFAAFSSK	225|85	9.4|9.4	24|24	6|3	6|3	1|1	1|1	0.469	---	3	1	-	-	0.61	---	3	-	-	-	3.354	---	3	1	*	-	0.953	---	3	-	-	-	gi|20792|emb|CAA41406.1|	100	4e-146	gi|20792|emb|CAA41406.1|	Type II chlorophyll a /b-binding protein [Pinus sylvestris]	80.74	2e-114	sp|P10708|CB12_SOLLC	Chlorophyll a-b binding protein 7, chloroplastic OS=Solanum lycopersicum GN=CAB7 PE=3 SV=1	100	4e-145	Q02070	Q02070_PINSY Type II chlorophyll a /b-binding protein (Precursor) OS=Pinus sylvestris GN=lhaB1 PE=2 SV=1	-
55	gi|297817116|ref|XP_002876441.1|	hypothetical protein ARALYDRAFT_907256 [Arabidopsis lyrata subsp. lyrata] >gi|297322279|gb|EFH52700.1| hypothetical protein ARALYDRAFT_907256 [Arabidopsis lyrata subsp. lyrata]	20979	MASHRNLIMLVTLSLLMKVALSQNGVVMGKNIFKWEFFPKIFVYVSNDIEGRLDLHSSCIENGNTVSRYRGLILPGRSKEFVHFTKTFWGGNRYVCEFRFGGETQTHRFTIYRDSRDNIDKYQCRNCFWSIRRNGPCAFNSHTERYDICYAWDR	-|29	-|8.4	-|-	-|1	-|1	-|1	-|1	-	---	-	-	-	-	-	---	-	-	-	-	-	---	-	-	-	-	-	---	-	-	-	-	gi|297817116|ref|XP_002876441.1|	100	4e-88	gi|297817116|ref|XP_002876441.1|	hypothetical protein ARALYDRAFT_907256 [Arabidopsis lyrata subsp. lyrata] >gi|297322279|gb|EFH52700.1| hypothetical protein ARALYDRAFT_907256 [Arabidopsis lyrata subsp. lyrata]	-	-	-	-	100	4e-87	D7LVX4	D7LVX4_ARALL Putative uncharacterized protein OS=Arabidopsis lyrata subsp. lyrata GN=ARALYDRAFT_907256 PE=4 SV=1	-
56	gi|255542920|ref|XP_002512523.1|	2-deoxyglucose-6-phosphate phosphatase, putative [Ricinus communis] >gi|223548484|gb|EEF49975.1| 2-deoxyglucose-6-phosphate phosphatase, putative [Ricinus communis]	132688	MDVKACVKVEQKKGVAEVEETKWRKVSAVLFDMDGVLCNSEEPSRLAAVDVFAEMGVDVTVEDFVPFMGTGEANFLGGVANVKGVQGFNTDAAKKRFFEIYLEKYAKPNSGIGFPGALELITQCKEKGLKVAVASSADRIKVDANLAAAGLPLSMFDAIVSADAFENLKPAPDIFLAASKILEVPPSECIVIEDALAGVQAAQAAQMRCIAVKTTLSEETLSNASPSLIRNDIGSVSLDDILSGGSDGYNNGSFPNNIATNDSVGGLQASRRNILRYGSLGIALSCLFFTISNWKAMQYASPQAIWNLLFRVNKLDFEKNENTGKSQSRVQQFVNYISDLETRETARIVPEFPAKLDWLNTAPLQFRRANYFSLFVQELKGKVVILDFWTYCCINCMHV…	51|56	1.5|1.5	2|2	1|1	1|1	1|1	1|1	---	---	1	1	-	-	---	---	1	-	-	-	---	---	1	1	-	-	---	---	1	-	-	-	gi|255542920|ref|XP_002512523.1|	100	0	gi|255542920|ref|XP_002512523.1|	2-deoxyglucose-6-phosphate phosphatase, putative [Ricinus communis] >gi|223548484|gb|EEF49975.1| 2-deoxyglucose-6-phosphate phosphatase, putative [Ricinus communis]	44.44	1e-116	sp|Q8NBF2|NHLC2_HUMAN	NHL repeat-containing protein 2 OS=Homo sapiens GN=NHLRC2 PE=1 SV=1	100	0	B9RFK4	B9RFK4_RICCO 2-deoxyglucose-6-phosphate phosphatase, putative OS=Ricinus communis GN=RCOM_1435490 PE=4 SV=1	SMb20213_2
57	gi|224102217|ref|XP_002312594.1|	predicted protein [Populus trichocarpa] >gi|222852414|gb|EEE89961.1| predicted protein [Populus trichocarpa]	24829	MDSDQGKLFIGGISWETSEEKLGEYFTQYGDVLQTVVMKDKTTGRPRGFGFVVFADPSVLDRVLQDTHTIDGRTVKEQQTNARAGNLNPARNTSSGGNIRTKKIFVGGLPPTLTDDGFRQYFEAFGLVTDVVIMYDQSTQRPRGFGFISFDSEDAVDRVLQRTFHDLNGKQVEVKRALPKEANPGGGGRSMGGSY	375|311	23.1|23.1	-|-	15|12	8|8	3|3	2|2	1.749	1.505	5	6	-	*	1.01	1.052	3	6	-	-	0.976	0.768	5	6	-	-	1.114	1	3	6	-	-	gi|224102217|ref|XP_002312594.1|	100	3e-103	gi|224102217|ref|XP_002312594.1|	predicted protein [Populus trichocarpa] >gi|222852414|gb|EEE89961.1| predicted protein [Populus trichocarpa]	70.31	2e-75	sp|Q8W034|RNP1_ARATH	Heterogeneous nuclear ribonucleoprotein 1 OS=Arabidopsis thaliana GN=RNP1 PE=1 SV=1	100	3e-102	B9HKT4	B9HKT4_POPTR Predicted protein (Fragment) OS=Populus trichocarpa GN=POPTRDRAFT_1085510 PE=4 SV=1	SPAC140.02
58	gi|1351202|sp|P28551.2|TBB3_SOYBN	RecName: Full=Tubulin beta chain; AltName: Full=Beta-tubulin >gi|312989|emb|CAA42777.1| beta-tubulin [Glycine max]	51520	MREILHIQGGQCGNQIGAKFWEVICDEHGIDHTGKYSGDSELQLERINVYYNEASGGRYVPRAVLMDLEPGTMDSVRSGPYGQIFRPDNFVFGQSGAGNNWAKGHYTEGAELIDSVLDVVRKEAENCDCLQGFQVCHSLGGGTGSGMGTLLISKIREEYPDRMMLTFSVFPSPKVSDTVVEPYNATLSVHQLVENADECMVLDNEALYDICFRTLKLATPTFGDLNHLISATMSGVTCCLRFPGQLNSDLRKLAVNLIPFPRLHFFMVGFAPLTSRGSQQYRALTVPELTQQMWDAKNMMCAADPRHGRYLTASAMFRGKMSTKEVDEQMINVQNKNSSYFVEWIPNNVKSSVCDIPPKGLKMASTFIGNSTSIQEMFRRVSEQFTAMFRRKAFLHWYT…	616|-	31.1|-	3|-	39|-	3|-	10|-	1|-	---	-	1	-	-	-	---	-	1	-	-	-	---	-	1	-	-	-	---	-	1	-	-	-	gi|1351202|sp|P28551.2|TBB3_SOYBN	100	0	gi|356555918|ref|XP_003546276.1|	PREDICTED: tubulin beta-3 chain [Glycine max]	100	0	sp|P28551|TBB3_SOYBN	Tubulin beta chain (Fragment) OS=Glycine max GN=TUBB PE=2 SV=2	100	0	I1L0G9	I1L0G9_SOYBN Uncharacterized protein OS=Glycine max GN=Gma.28850 PE=4 SV=1	ECU03g0820i
59	gi|351724907|ref|NP_001235794.1|	methionine synthase [Glycine max] >gi|33325957|gb|AAQ08403.1| methionine synthase [Glycine max]	100828	MASHIVGYPRMGPKRELKFALESFWDGKSSAEDLQKVSSDLRASIWKQMADAGIKYIPSNTFSHYDQVLDATATLGAVPPRYGWTGGEIGFDTYFSMARGNATVPAMEMTKWFDTNYHFIVPELGPDVNFTYASHKAVDEYKEAKALGVDTVPVLVGPVTYLLLSKPAKGVEKSFSLLSLLPKVLAVYKEVIADLKAAGASWIQFDEPTLVLDLESHKLQAFTDAYAELAPALSGLNVLVETYFADIPAEAYKTLTSLNGVTAYGFDLVRGTNTLDLIKGGFPSGKYLFAGVVDGRNIWANDLAASLTTLQGLEGIVGKDKLVVSTSSSLLHTAVDLVNETKLDDEIKSWLAFAAQKIVEVNALAKALSGHKDEAFFSGNAAALASRKSSPRVTNEAVQ…	-|540	-|11.0	-|-	-|20	-|1	-|7	-|1	-	---	-	-	-	-	-	---	-	-	-	-	-	---	-	-	-	-	-	---	-	-	-	-	gi|351724907|ref|NP_001235794.1|	100	3e-106	gi|50727380|gb|AAT81296.1|	methionine synthase [Medicago sativa]	88.58	0	sp|Q42662|METE_SOLSC	5-methyltetrahydropteroyltriglutamate--homocysteine methyltransferase OS=Solenostemon scutellarioides GN=MET PE=1 SV=2	100	0	Q71EW8	Q71EW8_SOYBN Methionine synthase OS=Glycine max GN=Gma.30744 PE=2 SV=1	XF2272
60	gi|224123660|ref|XP_002330176.1|	predicted protein [Populus trichocarpa] >gi|118482972|gb|ABK93398.1| unknown [Populus trichocarpa] >gi|118483781|gb|ABK93783.1| unknown [Populus trichocarpa] >gi|222871632|gb|EEF08763.1| predicted protein [Populus trichocarpa]	28330	MGIDLKRGGKSKKTKRTAPKSDDIYLKLLVKLYRFLVRRTGSRFNAVILKRLFMSKINKAPLSLSRLITFMKGKEDKIAVLVGTVTDDIRVYEVPALKVTALRFTETARARIEKAGGECLTFDQLALRAPLGQNTVLLRGPKNAREAVKHFGPAPGVPHSHTKPFVRAKGRKFEKARGKRNSRGFRV	120|119	12.8|12.8	-|-	4|6	1|2	2|2	1|1	---	---	-	1	-	-	---	---	-	-	-	-	---	---	-	-	-	-	---	---	-	-	-	-	gi|224123660|ref|XP_002330176.1|	100	5e-95	gi|224123660|ref|XP_002330176.1|	predicted protein [Populus trichocarpa] >gi|118482972|gb|ABK93398.1| unknown [Populus trichocarpa] >gi|118483781|gb|ABK93783.1| unknown [Populus trichocarpa] >gi|222871632|gb|EEF08763.1| predicted protein [Populus trichocarpa]	88.24	3e-87	sp|P42791|RL182_ARATH	60S ribosomal protein L18-2 OS=Arabidopsis thaliana GN=RPL18B PE=1 SV=2	100	5e-94	A9PAJ5	A9PAJ5_POPTR Predicted protein OS=Populus trichocarpa GN=POPTRDRAFT_581899 PE=2 SV=1	SPBC11C11.07
61	gi|5813829|gb|AAD52031.1|AF083555_1	magnesium-chelatase subunit CHLD precursor [Arabidopsis thaliana]	92380	FLSLPKRNRIASCRFTVRASANATVESPNGVPASTSDTETETDTTSYGRQFFPLAAVVGQEGIKTALLLGAVDREIGGIAISGRRGTAKTVMARGLHEILPPIEVVVGSISNADPACPNEWEDDLDERIEYNADNTIKTEIVKSPFIQIPLGVTEDRLIGSVDVEESVKRGTTVFQPGLLAEAHRGVLYVDEINLLDEGISNLLLNVLTDGVNIVEREGISFRHPCKPLLIATYNPEESAVREHLLDRVAINLDLPMSFEDRVAAVGIATQFQERCNEVFSMVNEETETAKTQIILAREYLKDVKISREQLKYLVLEAVRGGVQGHRAELYAARVAKCLAAIEGRKKVTIDDLRKAVELVILPRSSLDETPPEQQNQPPPPPPPPQNSESGEDENEEEQ…	102|159	5.0|5.0	3|3	4|5	2|3	3|3	1|1	1.574	1.165	2	2	-	-	---	0.794	1	2	-	-	0.853	0.825	2	2	-	-	---	0.724	1	2	-	-	gi|5813829|gb|AAD52031.1|AF083555_1	100	0	gi|5813829|gb|AAD52031.1|AF083555_1	magnesium-chelatase subunit CHLD precursor [Arabidopsis thaliana]	96.56	0	sp|Q9SJE1|CHLD_ARATH	Magnesium-chelatase subunit ChlD, chloroplastic OS=Arabidopsis thaliana GN=CHLD PE=2 SV=3	99.03	1e-166	D7KIS8	D7KIS8_ARALL T27G7.20 OS=Arabidopsis lyrata subsp. lyrata GN=ARALYDRAFT_311903 PE=4 SV=1	all0278_2
62	gi|15220443|ref|NP_172011.1|	50S ribosomal protein L6 [Arabidopsis thaliana] >gi|75277355|sp|O23049.1|RK6_ARATH RecName: Full=50S ribosomal protein L6, chloroplastic; AltName: Full=Protein EMBRYO DEFECTIVE 2394; Flags: Precursor >gi|189096131|pdb|3BBO|I Chain I, Homology Model	32961	MASSLVSSFQPRSAFLGDRNVFKVSSTPFAQVGYSSKTIECKESRIGKQPIAVPSNVTIALEGQDLKVKGPLGELALTYPREVELTKEESGFLRVKKTVETRRANQMHGLFRTLTDNMVVGVSKGFEKKLILVGVGYRATVDGKELVLNLGFSHPVKMQIPDSLKVKVEENTRITVSGYDKSEIGQFAATVRKWRPPEPYKGKGVKYSDEIVRRKEGKAGKKK	194|143	10.8|10.8	3|3	7|8	6|6	2|2	1|1	0.551	0.579	4	3	-	-	1.623	0.868	4	3	-	-	0.818	1.219	4	3	-	-	0.612	0.29	4	3	*	*	gi|15220443|ref|NP_172011.1|	100	3e-126	gi|15220443|ref|NP_172011.1|	50S ribosomal protein L6 [Arabidopsis thaliana] >gi|75277355|sp|O23049.1|RK6_ARATH RecName: Full=50S ribosomal protein L6, chloroplastic; AltName: Full=Protein EMBRYO DEFECTIVE 2394; Flags: Precursor >gi|189096131|pdb|3BBO|I Chain I, Homology Model For The Spinach Chloroplast 50s Subunit Fitted To 9.4a Cryo-Em Map Of The 70s Chlororibosome >gi|2388578|gb|AAB71459.1| Similar to Mycobacterium RlpF …	100	1e-126	sp|O23049|RK6_ARATH	50S ribosomal protein L6, chloroplastic OS=Arabidopsis thaliana GN=RPL6 PE=1 SV=1	99.5	4e-110	B9DI38	B9DI38_ARATH AT1G05190 protein (Fragment) OS=Arabidopsis thaliana GN=AT1G05190 PE=2 SV=1	all4201
63	gi|2829916|gb|AAC00624.1|	Unknown protein [Arabidopsis thaliana]	33941	METALLRYCVNFSGHKKISAHQRSNSEIPKTSPGGCEDEWCARVLSRRSVMASGLVSSTTALAFPREGLAVVKQGLLAGRVPGLSEPDEEGSFHSVLDSSSSCLALTLTYRRPDEKSGGHGVGWSPIIPYAFSVPQDWNEVPVSIADLGGTEIDLRFASPKEGRLSVIVAPVLRFADNLGDDVKIENIGQPAKVINAFGPEVIGENVEGKVLSSNVAEHDGRLYYQFELEPPHVLITATAAGNRLYLFSVTGNGLQWKRHYKDLKRIASSFRIV	65|-	6.2|-	8|-	1|-	1|-	1|-	1|-	---	-	1	-	-	-	---	-	-	-	-	-	---	-	1	-	-	-	---	-	-	-	-	-	gi|2829916|gb|AAC00624.1|	100	2e-159	gi|2829916|gb|AAC00624.1|	Unknown protein [Arabidopsis thaliana]	93.8	5e-146	sp|O49292|PPD4_ARATH	PsbP domain-containing protein 4, chloroplastic OS=Arabidopsis thaliana GN=PPD4 PE=1 SV=2	83.73	7e-76	B6T2T9	B6T2T9_MAIZE Tat pathway signal sequence family protein OS=Zea mays PE=2 SV=1	-
64	gi|460389504|ref|XP_004240392.1|	PREDICTED: protein disulfide-isomerase-like [Solanum lycopersicum]	68797	MAKSGILVIVSALVVLAVCGVFAEENEYVLTLDHSNLTETVAKHNFIVVEFYAPWCGHCKSLAPEYEKAASELSSHDPPIVLAKYDANDEANRELSKQYEIQGFPTIKILRDGGKKVQDYNGPREAAGIVSYLKKQVGPASAEIKSKEDATNLIDEKSIFVVGIFPDPSGEKFENYLTLAEKLRGEFDFAHTVDAKHLPRGGPVNKPTLRLLKPFDELFVDFEDFDVDAMEKFISESSIPVVTIFDNDPNNHPYVNKFFEGTNAKALLFVNFSSEFDAFKSKYNDVAVIYKGDGVSFLLGDVEAGQGAFEYFGLKPEQAPVIIIMDADEQKYIKDHVEPDAIAAYLKDYKEGKLKPHVKSEPIPEVNDEPVKVVVRDTLQDMVYKSGKNVLLEFYAPWC…	-|53	-|4.5	-|-	-|2	-|1	-|2	-|1	-	---	-	-	-	-	-	---	-	-	-	-	-	---	-	-	-	-	-	---	-	-	-	-	gi|460389504|ref|XP_004240392.1|	100	0	gi|460389504|ref|XP_004240392.1|	PREDICTED: protein disulfide-isomerase-like [Solanum lycopersicum]	67.09	9e-180	sp|Q9XF61|PDI_DATGL	Protein disulfide-isomerase OS=Datisca glomerata GN=PDI PE=2 SV=1	85.99	2e-63	C9DFB7	C9DFB7_NICBE Protein disulfide isomerase (Fragment) OS=Nicotiana benthamiana GN=PDI PE=2 SV=1	SPAC1F5.02
65	gi|351723891|ref|NP_001235503.1|	uncharacterized protein LOC100527141 [Glycine max]	22415	MFQDQEVQAAELERTFIAIKPDGVQRGLISEIISRFERKGYKLVGIKVVIPKKEFAQRHYHDLKEGPFFDGLCDFLSSGPVIAMVWEGQGVISYGRKLIGATDPQKSEPGTIRGDLAVVVGRNIIHGSDGLETAKDEIKLWFKPEELVSFTSNAEKWIYGAN	-|18	-|3.7	-|-	-|1	-|1	-|1	-|1	-	---	-	-	-	-	-	---	-	-	-	-	-	---	-	-	-	-	-	---	-	-	-	-	gi|351723891|ref|NP_001235503.1|	100	2e-90	gi|351723891|ref|NP_001235503.1|	uncharacterized protein LOC100527141 [Glycine max]	87.65	4e-82	sp|Q8LAH8|NDK4_ARATH	Nucleoside diphosphate kinase IV, chloroplastic/mitochondrial OS=Arabidopsis thaliana GN=NDK4 PE=1 SV=2	100	2e-89	C6T3F0	C6T3F0_SOYBN Nucleoside diphosphate kinase OS=Glycine max PE=2 SV=1	sll1852
66	gi|460397890|ref|XP_004244498.1|	PREDICTED: peptidyl-prolyl cis-trans isomerase FKBP13, chloroplastic-like isoform 1 [Solanum lycopersicum]	29828	MNSIPFSIVTYIPSKQPLLHCTKTSQTTTDPIPHFIKSSILSSSSKSVNKLAEKISPLPSSFSRRETLSACGLGFSAVLFEALLQPQSNIEAIAEEAAATECEFTVTPSGLAYCDKAVGYGPEAVKGQLIKAHYVGKLENGKVFDSSYNRGKPLTFRVGVGEVIKGWDQGILGGDGFPPMLTGGKRKLKIPPELGYGIRGAGCRGGTCIIPPDSVLLFDVEFVGKA	46|72	8.8|8.8	-|-	1|1	1|1	1|1	1|1	---	---	-	1	-	-	---	---	1	1	-	-	---	---	-	1	-	-	---	---	1	1	-	-	gi|460397890|ref|XP_004244498.1|	100	4e-98	gi|460397890|ref|XP_004244498.1|	PREDICTED: peptidyl-prolyl cis-trans isomerase FKBP13, chloroplastic-like isoform 1 [Solanum lycopersicum]	78.38	2e-10	sp|P59724|FKBP3_VICFA	FKBP-type peptidyl-prolyl cis-trans isomerase, chloroplastic (Fragment) OS=Vicia faba PE=1 SV=1	79.67	1e-41	C0PS03	C0PS03_PICSI Peptidyl-prolyl cis-trans isomerase OS=Picea sitchensis PE=2 SV=1	slr1761
67	gi|460403300|ref|XP_004247130.1|	PREDICTED: photosystem II reaction center PSB28 protein, chloroplastic-like [Solanum lycopersicum]	23295	MATLQSLAFSPALSHTTHQPRSLLGIASRIVHQSSGSSFNGQRLCLSRSRFATDIQNKKMSRLCIVMVQPKIQFIQGTDEQTIPDVKLTKSRDGTNGMAIFRFDQPSVFDSSGEVGDITGFYMIDEEGVLTSVDVNAKFVNGKPAGIEAKYIMRTPRDWDRFMRFMERYANSNGLQFVKS	73|195	8.9|8.9	-|-	2|7	2|7	1|1	1|1	---	1.446	1	3	-	-	---	1.741	1	3	-	-	---	0.757	1	3	-	-	---	1.967	1	3	-	*	gi|460403300|ref|XP_004247130.1|	100	2e-103	gi|460403300|ref|XP_004247130.1|	PREDICTED: photosystem II reaction center PSB28 protein, chloroplastic-like [Solanum lycopersicum]	63.64	1e-36	sp|O78418|PSB28_GUITH	Photosystem II reaction center psb28 protein OS=Guillardia theta GN=psb28 PE=3 SV=1	91.46	5e-39	B7FMR0	B7FMR0_MEDTR Photosystem II reaction center psb28 protein OS=Medicago truncatula PE=3 SV=1	-
68	gi|115437444|ref|NP_001043297.1|	Os01g0549700 [Oryza sativa Japonica Group] >gi|113532828|dbj|BAF05211.1| Os01g0549700, partial [Oryza sativa Japonica Group]	66499	HTPNSKSLPPPRTLAPSPPLSLSLSLSLSLSLSLCSRRRRRRRRRRVRFDSRRQVLSLQRAGTMAEAEVKDNEVYEEDLVDYEEEVENGTDGGANAANASADVVKKGYVGIHSSGFRDFLLKPELLRAIQDCGFEHPSEVQHECIPQAILGMDVICQAKSGMGKTAVFVLSSLQQIDPVAGQVGALVLCHTRELAYQICHEFERFSKYLPEVKVAVFYGGVHIKKHKDLLKNDCPHIVVGTPGRILALAREKDLSLKNVRHFILDECDKMLDSLDMRRDVQEIFKMTPHDKQVMMFSATLSKEIRPVCKKFMQDPMEIYVDDEAKLTLHGLVQHYIKLSEAEKNRKLNDLLDALDFNQVVIFVKSVSRAAELNKLLCECNFPAISIHSGMTQEERLTRY…	79|33	6.5|6.5	15|15	4|3	4|3	2|2	2|2	---	---	1	-	-	-	---	---	1	-	-	-	---	---	1	-	-	-	---	---	1	-	-	-	gi|115437444|ref|NP_001043297.1|	100	0	gi|222618647|gb|EEE54779.1|	hypothetical protein OsJ_02176 [Oryza sativa Japonica Group]	100	0	sp|Q0JM17|RH56_ORYSJ	DEAD-box ATP-dependent RNA helicase 56 OS=Oryza sativa subsp. japonica GN=Os01g0549700 PE=2 SV=2	100	0	B9EXG6	B9EXG6_ORYSJ Putative uncharacterized protein OS=Oryza sativa subsp. japonica GN=OsJ_02176 PE=4 SV=1	SPAC17G6.14c
69	gi|92122701|gb|ABE73781.1|	dirigent-related protein [Tamarix androssowii]	22527	MIAQFRRSPSFRYYPTPDSSLIAKLPWPEHRLKPGDHVSDEASGSICHDIVSGKDATAVKVAQASGTDKSPTAFGSVTMADDKLTEGPEPSSKIIGRAQGLYASACQEELGLLMAMSYSFTDGIYNGSSLSILGRNTVMHPVRELPVVGGTGVFRMARGFALAKTNWFSMSGDAIVGYNVTVIH	40|37	6.5|6.5	4|4	4|1	4|1	1|1	1|1	---	---	-	-	-	-	---	---	-	-	-	-	---	---	-	-	-	-	---	---	-	-	-	-	gi|92122701|gb|ABE73781.1|	100	3e-105	gi|92122701|gb|ABE73781.1|	dirigent-related protein [Tamarix androssowii]	31.01	2e-07	sp|P13240|DR206_PEA	Disease resistance response protein 206 OS=Pisum sativum GN=PI206 PE=2 SV=2	100	3e-104	Q1KPV7	Q1KPV7_9CARY Dirigent-related protein OS=Tamarix androssowii GN=drp PE=2 SV=1	-
70	gi|449454281|ref|XP_004144884.1|	PREDICTED: ubiquilin-2-like isoform 1 [Cucumis sativus] >gi|449473217|ref|XP_004153820.1| PREDICTED: ubiquilin-2-like isoform 1 [Cucumis sativus]	60296	MGADGDSSEHRVDGDAEEGGVSVAVNIRCSNGSKFSVTTSLDSTVATFKSILAQNCDIPADQQRLIYKGRILKDDQTLVSYGLQADHTIHMVRGFAQASSTPSAPASNVNTRSSDTAPGVTRGVGSNESGAFGNGGLGASLFPGLGFNPLGGGGAGLPEFEQVQQQLTQNPNMMREIMNMPAIQNLMNNPDLMRTLIMSNPQMRDIIDRNPELAHILNDPGILRQTLEAARNPELMREMMRNTDRAMSNIESSPEGFNMLRRMYENVQEPFLNATTMAGNAGNDSSSNPFAALLANQGGAQARNESNNSTTGSETTGNAAPNTNPLPNPWGNNASGGTQTTTTQPTPAGDTRAPGIGGLGGAGRTNMDRFAGAVPDPAQLNQFLQNPAISQMMQSLLSN…	-|92	-|5.6	-|4	-|4	-|4	-|2	-|2	-	0.619	-	2	-	-	-	---	-	1	-	-	-	0.829	-	2	-	-	-	---	-	1	-	-	gi|449454281|ref|XP_004144884.1|	100	2e-88	gi|449533958|ref|XP_004173937.1|	PREDICTED: ubiquilin-2-like, partial [Cucumis sativus]	60.87	1e-08	sp|Q10169|DSK2_SCHPO	Deubiquitination-protection protein dph1 OS=Schizosaccharomyces pombe (strain 972 / ATCC 24843) GN=dph1 PE=4 SV=1	91.51	2e-48	H9M9H5	H9M9H5_PINRA Uncharacterized protein (Fragment) OS=Pinus radiata GN=0_11297_01 PE=4 SV=1	SPAC26A3.16
71	gi|15223302|ref|NP_177254.1|	asparaginyl-tRNA synthetase, cytoplasmic 3 [Arabidopsis thaliana] >gi|20140327|sp|Q9SSK1.1|SYNC3_ARATH RecName: Full=Asparagine--tRNA ligase, cytoplasmic 3; AltName: Full=Asparaginyl-tRNA synthetase 3; Short=AsnRS 3 >gi|5902407|gb|AAD55509.1|AC00814	75428	MGDEIVPPANQLAADNLENDGSTVQKAQFSDRVLIRSILGGGAKLAGQKVRIGGWVKTGRQQGKGTFAFLEVNDGSCPANLQVMVDSSLYDLSRLVATGTCVTVDGVLKIPPEGKGLKQSIELSVETVIAVGTVDPTTYPLPKTKLTPEFLRDVLHLRSRTNLISAVARIRNALAFATHSFFQEHSFLYIHTPIITTSDCEGAGEMFQVTTLINHTERVEQDLIDNPPPTEADVEAARLIVKERGEAVAQLKVAKASKEEITASVAQLSVAKASLAHVEERLRLKPGLPKNDGKIDYSNDFFGRQAFLTVSGQLQVETYACALSSVYTFGPTFRAENSHTSRHLAEFWMVEPEIAFADIHDDMNCAEAYVKYMCKWLMDKCGDDMELMDKNVDEGCTKR…	-|39	-|1.9	-|36	-|1	-|1	-|1	-|1	-	---	-	-	-	-	-	---	-	-	-	-	-	---	-	-	-	-	-	---	-	-	-	-	gi|15223302|ref|NP_177254.1|	100	0	gi|15223302|ref|NP_177254.1|	asparaginyl-tRNA synthetase, cytoplasmic 3 [Arabidopsis thaliana] >gi|20140327|sp|Q9SSK1.1|SYNC3_ARATH RecName: Full=Asparagine--tRNA ligase, cytoplasmic 3; AltName: Full=Asparaginyl-tRNA synthetase 3; Short=AsnRS 3 >gi|5902407|gb|AAD55509.1|AC008148_19 Similar to asparaginyl-tRNA synthetases [Arabidopsis thaliana] >gi|332197025|gb|AEE35146.1| asparaginyl-tRNA synthetase, cytoplasmic 3 [Arabidops…	100	0	sp|Q9SSK1|SYNC3_ARATH	Asparagine--tRNA ligase, cytoplasmic 3 OS=Arabidopsis thaliana GN=SYNC3 PE=3 SV=1	88.82	0	D7MWY8	D7MWY8_ARALL Putative uncharacterized protein OS=Arabidopsis lyrata subsp. lyrata GN=ARALYDRAFT_497343 PE=3 SV=1	CAC3260
72	gi|350534514|ref|NP_001234656.1|	mRNA binding protein precursor [Solanum lycopersicum] >gi|26453355|gb|AAD21574.3| mRNA binding protein precursor [Solanum lycopersicum]	52906	MATLASSSSLLHSSSSSFNSSSTPSISPVSRISLKFPSSSLSSSLSISPYFVAFSLNSRRVSPKSYSSTSVVQASGAVEKKKVLIVNTNSGGHAVIGFYFAKELLGSGHDVTVLTVGEESSDKMKKTPFTRFSEITGAGGRTVWGNPADVGKILEGEVFDAVLDNNGKDLDSVSPVADWAKSSGVKQFLFISSAGIYKPTDEPPHVEGDAVKADAGHVLVEKYISEIFGSWASFRPQYMIGSGNNKDCEEWFFDRIVRGRPVLIPGSGMQLTNISHVRDLSSMLTLAVQNPAAASGRIFNCVSDRAVTLDGMARLCAKAAGSSVEIVHYDPKAVGVDAKKAFPFRNMHFYAEPRAPNEILGWSATTNLPEDLKERYEEYVKIGRDKKEMKFELDDKILE…	-|21	-|4.9	-|-	-|1	-|1	-|1	-|1	-	---	-	-	-	-	-	---	-	-	-	-	-	---	-	-	-	-	-	---	-	-	-	-	gi|350534514|ref|NP_001234656.1|	100	0	gi|350534514|ref|NP_001234656.1|	mRNA binding protein precursor [Solanum lycopersicum] >gi|26453355|gb|AAD21574.3| mRNA binding protein precursor [Solanum lycopersicum]	80	8e-168	sp|Q9LYA9|CP41A_ARATH	Chloroplast stem-loop binding protein of 41 kDa a, chloroplastic OS=Arabidopsis thaliana GN=CSP41A PE=1 SV=1	100	0	Q9XEJ6	Q9XEJ6_SOLLC MRNA binding protein (Precursor) OS=Solanum lycopersicum PE=2 SV=2	FN1299
73	gi|4455180|emb|CAB36712.1|	putative protein [Arabidopsis thaliana] >gi|7270385|emb|CAB80152.1| putative protein [Arabidopsis thaliana]	64317	MAVALQFSRLCVRPDTFVRENHLSGSGSLRRRKALSVRCSSGDENAPSPSVVMDSDFDAKVFRKNLTRSDNYNRKGFGHKEETLKLMNREYTSDILETLKTNGYTYSWGDVTVKLAKAYGFCWGVERAVQIAYEARKQFPEERLWITNEIIHNPTVNKRLEDMDVKIIPVEDSKKQFDVVEKDDVVILPAFGAGVDEMYVLNDKKHRLLISSFLTFVTLKVWNTVEKHKKGEYTSVIHGKYNHEETIATASFAGKYIIVKNMKEANYVCDYILGGQYDGSSSTKEEFMEKFKYAISKGFDPDNDLVKVGIANQTTMLKGETEEIGRLLETTMMRKYGVENERQDAIYELVEEKIDLMLVVGGWNSSNTSHLQEISEARGIPSYWIDSEKRIGPGNKIAY…	-|23	-|2.4	-|12	-|1	-|1	-|1	-|1	-	---	-	-	-	-	-	---	-	-	-	-	-	---	-	-	-	-	-	---	-	-	-	-	gi|4455180|emb|CAB36712.1|	100	0	gi|4455180|emb|CAB36712.1|	putative protein [Arabidopsis thaliana] >gi|7270385|emb|CAB80152.1| putative protein [Arabidopsis thaliana]	94.02	0	sp|Q94B35|ISPH_ARATH	4-hydroxy-3-methylbut-2-enyl diphosphate reductase, chloroplastic OS=Arabidopsis thaliana GN=ISPH PE=2 SV=1	91.03	0	D7MF24	D7MF24_ARALL Putative uncharacterized protein OS=Arabidopsis lyrata subsp. lyrata GN=ARALYDRAFT_491231 PE=3 SV=1	all0985
74	gi|168009197|ref|XP_001757292.1|	predicted protein [Physcomitrella patens subsp. patens] >gi|168009423|ref|XP_001757405.1| predicted protein [Physcomitrella patens subsp. patens] >gi|162691415|gb|EDQ77777.1| predicted protein [Physcomitrella patens subsp. patens] >gi|162691528|gb|E	16455	MSWQSYVDDHLMYPLPTGHSLVAAAIIGHDGSVWAQSEMFPQLSSTEVEKLLDGFEDGSLLAENGLFLGSAKYMVLQGEAGVVIRGKKGAGGCTVKKTNSAFVIGLYDYPVTPGECNMVVERLGDYLCDQGL	43|-	9.8|-	-|-	1|-	1|-	1|-	1|-	---	-	-	-	-	-	---	-	-	-	-	-	---	-	-	-	-	-	---	-	-	-	-	-	gi|168009197|ref|XP_001757292.1|	100	1e-72	gi|168009197|ref|XP_001757292.1|	predicted protein [Physcomitrella patens subsp. patens] >gi|168009423|ref|XP_001757405.1| predicted protein [Physcomitrella patens subsp. patens] >gi|162691415|gb|EDQ77777.1| predicted protein [Physcomitrella patens subsp. patens] >gi|162691528|gb|EDQ77890.1| predicted protein [Physcomitrella patens subsp. patens]	66.67	8e-46	sp|Q9LEI8|PROF6_HEVBR	Profilin-6 OS=Hevea brasiliensis PE=1 SV=1	100	1e-71	A9RTB9	A9RTB9_PHYPA Profilin OS=Physcomitrella patens subsp. patens GN=PHYPADRAFT_205387 PE=3 SV=1	-
75	gi|312281509|dbj|BAJ33620.1|	unnamed protein product [Thellungiella halophila]	34549	MDSSKLSLLSLCLLICIICSPQHSLSCGSCNHQKGGLPSIKPPVTIPKLPVPPVTVPKVPVPPVTVPNLPVPPVTVPKLPIPPVTVPKLPVTVPKLPVPPVTVPKLPIPPVAIPKVPVPPVTVPKVPVPPVTVPELPLPPVGGLPTLPLPPLPGTIPPATGGKDCPPTPGSEMPPSGSGKATCPIDTLKLGACVDLLGGLVKIGLGDPAVNKCCPLLKGLVEVEAAACLCTTLKLKALNLKLYVPVALQLLLTCGKNPPPGYTCSI	111|93	3.8|3.8	3|3	10|6	10|6	1|1	1|1	---	---	1	1	-	-	---	---	1	1	-	-	---	---	1	1	-	-	---	---	1	1	-	-	gi|312281509|dbj|BAJ33620.1|	100	2e-40	gi|312281509|dbj|BAJ33620.1|	unnamed protein product [Thellungiella halophila]	58.62	1e-06	sp|Q00451|PRF1_SOLLC	36.4 kDa proline-rich protein OS=Solanum lycopersicum GN=TPRP-F1 PE=2 SV=1	100	2e-39	E4MVI7	E4MVI7_THEHA mRNA, clone: RTFL01-06-B11 OS=Thellungiella halophila PE=2 SV=1	-
76	gi|440577145|emb|CBM42478.1|	RuBisCO, partial [Oryzopsis lessoniana]	53871	GFQAGVKDYRLTYYTPEYETKDTDILAAFRVSPQPGVPPEEAGAAVAAESSTGTWTTVWTDGLTSLDRYKGRCYHIEPVAGEDSQWICYVAYPLDLFEEGSVTNMFTSIVGNVFGFKALRALRLEDLRIPPTYSKTFQGPPHGIQVERDKLNKYGRPLLGCTIKPKLGLSAKNYGRACYECLRGGLDFTKDDENVNSQPFMRWRDRFVFCAEAIYKSQAETGEIKGHYLNATAGTXEDMMKRAVFARELGVPIVMHDYLTGGFTANTTLAHYCRDNGLLLHIHRAMHAVIDRQKNHGMHFRVLAKALRMSGGDHIHSGTVVGKLEGEREITLGFVDLLRDDYIEKDRXRGIFFTQDWVSMPGVLPVASGGIHVWHMPALTEIFGDDSVLQFGGGTLGHP…	-|413	-|15.8	-|-	-|33	-|3	-|7	-|2	-	0.187	-	3	-	*	-	3.307	-	3	-	*	-	0.257	-	3	-	*	-	0.148	-	3	-	*	gi|440577145|emb|CBM42478.1|	100	0	gi|440577145|emb|CBM42478.1|	RuBisCO, partial [Oryzopsis lessoniana]	97.44	0	sp|B3TN59|RBL_BRADI	Ribulose bisphosphate carboxylase large chain OS=Brachypodium distachyon GN=rbcL PE=3 SV=1	97.44	0	Q37734	Q37734_9POAL Ribulosebiphosphate carboxylase OS=Peridictyon sanctum GN=rbcL PE=3 SV=1	alr1524
77	gi|217944|dbj|BAA03104.1|	light-harvesting chlorophyll a/b-binding protein (LHCP) precursor [Lactuca sativa]	32534	MAASTMALSSPFAGQAVKTSPSSSELFGNGRVSMRKTAAAKKAAPSGSPWYGPDRVKYLGPFSGEAPSYLTGEFPGDYGWDTAGLSADPETFSKNRELEVIHCRWAMLGALGCVFPELLARNGVKFGEAVWFKAGSQIFSEGGLDYLGNPSLVHAQSILAIWATQVILMGAVEGYRIAGGPLGEVVDPLYPGGSFDPLGLADDPEAFAELKVKEIKNGRLAMFSMFGFFVQAIVTGKGPLENLADHLADPVANNAWSYATNFVPGK	78|58	7.9|7.9	-|-	7|8	2|3	2|2	1|1	---	---	-	-	-	-	---	---	-	-	-	-	---	---	-	-	-	-	---	---	-	-	-	-	gi|217944|dbj|BAA03104.1|	100	1e-147	gi|217944|dbj|BAA03104.1|	light-harvesting chlorophyll a/b-binding protein (LHCP) precursor [Lactuca sativa]	96.55	2e-59	sp|P10707|CB2D_SOLLC	Chlorophyll a-b binding protein 1D (Fragment) OS=Solanum lycopersicum GN=CAB1D PE=3 SV=1	100	1e-146	Q40247	Q40247_LACSA Light-harvesting chlorophyll a/b-binding protein (LHCP) (Precursor) OS=Lactuca sativa GN=cab PE=2 SV=1	-
78	gi|22797141|emb|CAD23950.1|	ATP synthase epsilon subunit [Olea europaea]	16805	TLNLCVLTPNRIVWDSEVKEIILYTNSGQIGVLPNHAPIATAVDIGILRIRFKDQWLTMALMGGFARIGNNEIIILVNDAEKGSDIDPQEAQKTLEIAEANLRKAEGKRQIIEANLALRRARTRVEAVNVIS	88|-	21.2|-	3|-	9|-	4|-	3|-	1|-	---	-	1	-	-	-	---	-	1	-	-	-	---	-	1	-	-	-	---	-	1	-	-	-	gi|22797141|emb|CAD23950.1|	100	2e-70	gi|22797141|emb|CAD23950.1|	ATP synthase epsilon subunit [Olea europaea]	93.18	8e-66	sp|Q2L911|ATPE_GOSHI	ATP synthase epsilon chain, chloroplastic OS=Gossypium hirsutum GN=atpE PE=3 SV=1	100	3e-69	F4MKQ2	F4MKQ2_OLEEU ATPase epsilon subunit OS=Olea europaea subsp. europaea GN=atpE PE=3 SV=1	slr1330
79	gi|330318718|gb|AEC11019.1|	ribosomal protein s13 [Camellia sinensis]	15826	MGRMHSRGKGISASALPYKRTPPNWLKISSPDVEENICKFAKKGMTPSQIGVILRDSHGIAQVKSVTGSKILRILKAHGLAPEIPEDLYHLFKKAVAIRKHLERNR	54|-	20.8|-	-|-	5|-	1|-	2|-	1|-	---	-	1	-	-	-	---	-	1	-	-	-	---	-	1	-	-	-	---	-	1	-	-	-	gi|330318718|gb|AEC11019.1|	100	3e-56	gi|330318718|gb|AEC11019.1|	ribosomal protein s13 [Camellia sinensis]	93.4	3e-53	sp|P62302|RS13_SOYBN	40S ribosomal protein S13 OS=Glycine max GN=RPS13 PE=2 SV=1	100	4e-55	F4YFF8	F4YFF8_CAMSI Ribosomal protein s13 (Fragment) OS=Camellia sinensis PE=2 SV=1	SPAC6F6.07c
80	gi|224064013|ref|XP_002301348.1|	predicted protein [Populus trichocarpa] >gi|222843074|gb|EEE80621.1| predicted protein [Populus trichocarpa]	39103	MAEATKSYAVVTGANKGIGFEICRQLASKGIVVVLTSRNEKRGLESVQKLKESGLSDFVVFHQLDVADINSIASLADFIKSQFGKLDILVNNAGVGGVKTDGDALKAAISGKEGAKINWSEFITQTWELAEECLRINYYGAKRMAEALIPLLQLSDSPRIVNVSSSMGNLKGVSNEWAKGVLGDAENLTEERVDEVLSKYLEDFKEGSLETEGWPAMMSAYILSKAAMSAFTRVLAKKHPTFCVNCVCPGYVKTDINFNTGIRPVEEGAENVVRLALLPNGGPSGCFFDRTEESPF	-|40	-|5.4	-|-	-|3	-|3	-|1	-|1	-	---	-	-	-	-	-	---	-	-	-	-	-	---	-	-	-	-	-	---	-	-	-	-	gi|224064013|ref|XP_002301348.1|	100	1e-172	gi|224064013|ref|XP_002301348.1|	predicted protein [Populus trichocarpa] >gi|222843074|gb|EEE80621.1| predicted protein [Populus trichocarpa]	67.56	1e-112	sp|Q9M2E2|SDR1_ARATH	(+)-neomenthol dehydrogenase OS=Arabidopsis thaliana GN=SDR1 PE=1 SV=1	100	1e-171	B9GPY4	B9GPY4_POPTR Predicted protein OS=Populus trichocarpa GN=POPTRDRAFT_644424 PE=3 SV=1	all0352
81	gi|147834020|emb|CAN73168.1|	hypothetical protein VITISV_027983 [Vitis vinifera]	47120	MDALFINTSLSRLKLSPKPTSLSPLPSLPLHSLHLRPSRRFNLTVSQKQFEETEELLKDEVFDSYNEDESYGEVSKIIGSRAAEGEKGMEYLIEWKDGHVPTWVPARYVAGDVVAEYESPWWTAAKKADDAALKALLESGDGRDVDAVDENGRTALLFAAGLGSEACVQILADAGADLNHRDNGGGGLTALHMAAGYVKPGVARLLIQLGADPEAEDDRGRTPLDLAREMLRATPKGNPMQFARRLGLENVVRVLEEAIFEYAEVQEIMERRGKGQNLEYLVKWKDGSDNEWVKAGLIAEELVRDFEAGLEYAVAQGVMGKRTGDDGNMEYLVKWTDIDEATWEPEENVDPDLIKAFEENGAADLGAHVEGGS	-|36	-|2.4	-|2	-|1	-|1	-|1	-|1	-	---	-	-	-	-	-	---	-	-	-	-	-	---	-	-	-	-	-	---	-	-	-	-	gi|147834020|emb|CAN73168.1|	100	0	gi|147834020|emb|CAN73168.1|	hypothetical protein VITISV_027983 [Vitis vinifera]	67.01	2e-104	sp|O22265|SR43C_ARATH	Signal recognition particle 43 kDa protein, chloroplastic OS=Arabidopsis thaliana GN=CAO PE=1 SV=2	100	0	A5C8N4	A5C8N4_VITVI Putative uncharacterized protein OS=Vitis vinifera GN=VITISV_027983 PE=4 SV=1	all2748
82	gi|226445618|gb|ACO58327.1|	chloroplast photosystem II light harvesting complex-like protein [Helianthus annuus] >gi|226445620|gb|ACO58328.1| chloroplast photosystem II light harvesting complex-like protein [Helianthus annuus] >gi|226445622|gb|ACO58329.1| chloroplast photosyst	3895	ADDPEAFAELKVKEIKNGRLAMFS	28|-	45.8|-	-|-	1|-	1|-	1|-	1|-	---	-	-	-	-	-	---	-	-	-	-	-	---	-	-	-	-	-	---	-	-	-	-	-	gi|226445618|gb|ACO58327.1|	100	4e-06	gi|148909129|gb|ABR17665.1|	unknown [Picea sitchensis]	100	2e-06	sp|P04782|CB24_PETSP	Chlorophyll a-b binding protein 25, chloroplastic OS=Petunia sp. GN=CAB25 PE=3 SV=1	-	-	-	-	-
83	gi|4467147|emb|CAB37516.1|	putative protein [Arabidopsis thaliana] >gi|7270843|emb|CAB80524.1| putative protein [Arabidopsis thaliana]	93298	MMIMKILPMCTPDKVHDVKLADSVDDDGLATSGRQMNPASGGTSGAAAARASDSIDTGIGNSYGSRGALSFAAAAMAGLGAASGRGIRGSRDLHGRTLNRSSDEPSKLIFTAAGKQLSRHLTIYQAVQRQLMLDEDDDDRFGGSDLVSSDGSRFNDIYTIMYQRPDSQVNRLSVGGASSTTPSKSTKSATTNSSVESQSHRASLLDSILQGELPCDLEKSNSTYNVLALLRVLEEGKITSLDDLSTTAAKVPLDEFVNSKLTPKLARQIQDALALCSGSLPSWCYQLTRACPFLFPFQTRRQYFYSTAFGLSRALNRLQQQQGADGSGSTNEREMRIGRLQRQKVRVSRNRILDSAAKVMEMYSSQKAVLEVEYFGEVGTGLGPTLEFYTLLSHDLQKA…	-|24	-|2.0	-|3	-|1	-|1	-|1	-|1	-	---	-	-	-	-	-	---	-	-	-	-	-	---	-	-	-	-	-	---	-	-	-	-	gi|4467147|emb|CAB37516.1|	100	0	gi|4467147|emb|CAB37516.1|	putative protein [Arabidopsis thaliana] >gi|7270843|emb|CAB80524.1| putative protein [Arabidopsis thaliana]	96.25	0	sp|Q6WWW4|UPL3_ARATH	E3 ubiquitin-protein ligase UPL3 OS=Arabidopsis thaliana GN=UPL3 PE=1 SV=1	96.62	0	B3H700	B3H700_ARATH E3 ubiquitin-protein ligase UPL3 OS=Arabidopsis thaliana GN=KAK PE=4 SV=1	YKL010c
84	gi|217071502|gb|ACJ84111.1|	unknown [Medicago truncatula]	38640	MAKEEVKTVVPESVLKKQKRNEEWALVKKQEQESAKKKRSETRKLIWSRAKQYAKEYDDSQKELIALKREAKLKGGFYVDPEAKLLFIIRIRGINAMDPKSRKILQLLRLRQICNGVFLKVNKATVNMLHRVEPYVTYGYPNLKSVRELIYKRGYGKVDRQRIALTDNSIIEQVLGKHGIICIEDLIHEILTVGPHFREANNFLWPFKLKAPLGGMKKKRNHYVESGDAGNREDYINELIRKMN	76|91	6.1|15.6	4|3	2|4	2|2	1|3	1|1	0.436	---	2	1	-	-	1.467	---	2	1	-	-	1.228	---	2	1	-	-	0.707	---	2	1	-	-	gi|217071502|gb|ACJ84111.1|	100	3e-133	gi|217071502|gb|ACJ84111.1|	unknown [Medicago truncatula]	82.92	5e-109	sp|P60040|RL72_ARATH	60S ribosomal protein L7-2 OS=Arabidopsis thaliana GN=RPL7B PE=1 SV=1	100	3e-132	B7FH82	B7FH82_MEDTR Putative uncharacterized protein OS=Medicago truncatula PE=2 SV=1	SPBC18H10.12c
85	gi|460380444|ref|XP_004235966.1|	PREDICTED: chaperone protein ClpB1-like [Solanum lycopersicum]	119839	MNPEKFTHKTNEAIAEAHELAVSAGHAQLTPLHMALALLSDHSGIFWQAIVNAAGSEETANGVERVFNQAKKKIPSQSPAPDQVPASTSLIKVLRRAQSLQKSRGDSHLAVDLLILGLLEDSQIADLLKDSGLSAARVKSEVEKLRGKDGKKVESATGDTTFQALKTYGRDLVEQAGKLDPVIGRDEEIRRVIRILSRRTKNNPVLIGEPGVGKTAVVEGLAQRIVRGDVPSNLADVRLIALDMGALIAGAKYRGEFEERLKAVLKEVEDAEGKVILFIDEIHLVLGAGRTEGSMDAANLFKPMLARGQLRCIGATTLEEYRKYVEKDAAFERRFQQVYVAEPSVPDTISILRGLKEKYEGHHGVKIQDRALVIAAQLSARYITGRHLPDKAIDLVDEA…	-|37	-|4.0	-|-	-|2	-|1	-|2	-|1	-	---	-	-	-	-	-	---	-	-	-	-	-	---	-	-	-	-	-	---	-	-	-	-	gi|460380444|ref|XP_004235966.1|	100	0	gi|460380444|ref|XP_004235966.1|	PREDICTED: chaperone protein ClpB1-like [Solanum lycopersicum]	85.22	0	sp|P42730|CLPB1_ARATH	Chaperone protein ClpB1 OS=Arabidopsis thaliana GN=CLPB1 PE=1 SV=2	92.09	0	Q9ZT13	Q9ZT13_TOBAC 101 kDa heat shock protein OS=Nicotiana tabacum GN=HSP101 PE=2 SV=2	slr1641
86	gi|115486843|ref|NP_001068565.1|	Os11g0708900 [Oryza sativa Japonica Group] >gi|62733312|gb|AAX95429.1| phenylalanine ammonia-lyase [Oryza sativa Japonica Group] >gi|113645787|dbj|BAF28928.1| Os11g0708900 [Oryza sativa Japonica Group]	85404	MECETGVNGSGPRGSDPLYWGKAAEGVAGSHLEEVKRMVVEYRAPLVKIDGAMLSVAKVAAVAGEAARVQVVLDESARPRLEASREWVFESTMNGTDTYGVTTGFGGAAHRRTKEFAALQKELIRYLNAGVFGASRSDGYTLPTEVTRAAMLVRINTLTQGYSGIRFEILEAIAKLLNANVTPCLPLRGTITASGDLVPLSYIAGLITGRHNSAAVAPDGTKVDAAEAFRMAGIEHGFFALQPKEGLAIVNGTAVGSGLAAIVLFEANVLAVLAEVLSAVYCEVMAGNPEYTDHLIHALKHHPGQIEAAAIMEHILEGSSYMKKLAKDKEQGQGELDRLTKLKQDRYAIRTAPQWLGPQVEVIRFATKSIEREINSVNDNPVIDVARRKALHGGNFQGT…	22|-	1.0|-	-|-	1|-	1|-	1|-	1|-	---	-	-	-	-	-	---	-	-	-	-	-	---	-	-	-	-	-	---	-	-	-	-	-	gi|115486843|ref|NP_001068565.1|	100	0	gi|115486843|ref|NP_001068565.1|	Os11g0708900 [Oryza sativa Japonica Group] >gi|62733312|gb|AAX95429.1| phenylalanine ammonia-lyase [Oryza sativa Japonica Group] >gi|113645787|dbj|BAF28928.1| Os11g0708900 [Oryza sativa Japonica Group]	72.88	0	sp|Q43210|PALY_WHEAT	Phenylalanine ammonia-lyase OS=Triticum aestivum GN=PAL PE=3 SV=1	100	0	Q53NW6	Q53NW6_ORYSJ Phenylalanine ammonia-lyase OS=Oryza sativa subsp. japonica GN=Os11g0708900 PE=3 SV=1	RSp0365
87	gi|18414467|ref|NP_567468.1|	PsbP domain-containing protein 1 [Arabidopsis thaliana] >gi|13959580|sp|O23403.1|PPD1_ARATH RecName: Full=PsbP domain-containing protein 1, chloroplastic; AltName: Full=OEC23-like protein 3; AltName: Full=PsbP-related thylakoid lumenal protein 1; Fl	37227	MASSAFAFPSYIITKGASTDSFKSTSLSSSRSLVTDFHLLFSRPISSGPKYQSAKSAKPESPVAINCLTDAKQVCAVGRRKSMMMGLLMSGLIVSQANLPTAFASTPVFREYIDTFDGYSFKYPQNWIQVRGAGADIFFRDPVVLDENLSVEFSSPSSSNYTSLEDLGSPEEVGKRVLRQYLTEFMSTRLGVKRQANILSTSSRVADDGKLYYQVEVNIKSYANNNELAVMPQDRVARLEWNRRYLAVLGVENDRLYSIRLQTPEKVFLEEEKDLRRVMDSFRVEKI	36|37	8.7|3.1	5|11	2|1	1|1	2|1	1|1	---	---	-	-	-	-	---	---	-	-	-	-	---	---	-	-	-	-	---	---	-	-	-	-	gi|18414467|ref|NP_567468.1|	100	2e-144	gi|18414467|ref|NP_567468.1|	PsbP domain-containing protein 1 [Arabidopsis thaliana] >gi|13959580|sp|O23403.1|PPD1_ARATH RecName: Full=PsbP domain-containing protein 1, chloroplastic; AltName: Full=OEC23-like protein 3; AltName: Full=PsbP-related thylakoid lumenal protein 1; Flags: Precursor >gi|332658213|gb|AEE83613.1| PsbP domain-containing protein 1 [Arabidopsis thaliana]	100	6e-145	sp|O23403|PPD1_ARATH	PsbP domain-containing protein 1, chloroplastic OS=Arabidopsis thaliana GN=PPD1 PE=1 SV=1	93.36	5e-134	D7MAH0	D7MAH0_ARALL Photosystem II reaction center PsbP family protein (Fragment) OS=Arabidopsis lyrata subsp. lyrata GN=ARALYDRAFT_493338 PE=4 SV=1	-
88	gi|18403909|ref|NP_565812.1|	NEDD8-like protein RUB2 [Arabidopsis thaliana] >gi|302393809|sp|Q8RUC6.3|RUB2_ARATH RecName: Full=Ubiquitin-NEDD8-like protein RUB2; Contains: RecName: Full=Ubiquitin; Contains: RecName: Full=NEDD8-like protein RUB2; AltName: Full=Ubiquitin-related	22007	MQIFVKTLTGKTITLEVESSDTIDNVKAKIQDKEGIPPDQQRLIFAGKQLEDGRTLADYNIQKESTLHLVLRLRGGTMIKVKTLTGKEIEIDIEPTDTIDRIKERVEEKEGIPPVQQRLIYAGKQLADDKTAKDYAIEGGSVLHLVLALRGGLL	254|277	31.2|31.2	17|17	18|17	6|5	4|4	1|1	0.713	1.13	4	5	*	-	---	---	-	1	-	-	0.993	0.726	4	5	-	-	---	---	-	1	-	-	gi|18403909|ref|NP_565812.1|	100	4e-37	gi|18412785|ref|NP_567286.1|	ubiquitin 11 [Arabidopsis thaliana] >gi|30679296|ref|NP_849291.1| polyubiquitin 14 [Arabidopsis thaliana] >gi|79325001|ref|NP_001031585.1| ubiquitin 11 [Arabidopsis thaliana] >gi|186511479|ref|NP_567247.2| polyubiquitin 14 [Arabidopsis thaliana] >gi|186511546|ref|NP_001118936.1| ubiquitin 11 [Arabidopsis thaliana] >gi|302595976|sp|P0CH33.1|UBQ11_ARATH RecName: Full=Polyubiquitin 11; Contains: Rec…	100	2e-37	sp|P69322|UBIQP_PEA	Polyubiquitin OS=Pisum sativum GN=PU1 PE=2 SV=2	100	7e-36	C5E7H1	C5E7H1_MALDO Polyubiquitin (Fragment) OS=Malus domestica PE=2 SV=1	YLL039c
89	gi|428182625|gb|EKX51485.1|	hypothetical protein GUITHDRAFT_159319 [Guillardia theta CCMP2712]	32826	MAARVGAPAPAPTARPGITLPNQTLYINNLNDKISKQVLRSELYVLCSQFGGVLDVVALKTGKMRGQAFVVFQQLTAASVALQKLQGFEFYGKPMRTAFCRTKSDVIAKEDGTFVPKQKRKTESHVPAYKQPNKKQMVESQAEAQPEGDQDMQEETNQPINKILFLERLPDEINVEMLQTLFKQFPGLAEVRMVPGKTGIAFVEFESDAQAATARDTLQGFKLTPTNTLRITYAKKN	24|-	3.8|-	-|-	1|-	1|-	1|-	1|-	---	-	-	-	-	-	---	-	-	-	-	-	---	-	-	-	-	-	---	-	-	-	-	-	gi|428182625|gb|EKX51485.1|	100	4e-126	gi|428182625|gb|EKX51485.1|	hypothetical protein GUITHDRAFT_159319 [Guillardia theta CCMP2712]	55.95	8e-21	sp|Q06AA4|SNRPA_PIG	U1 small nuclear ribonucleoprotein A OS=Sus scrofa GN=SNRPA PE=2 SV=1	62.11	1e-28	F6SJ33	F6SJ33_MONDO Uncharacterized protein OS=Monodelphis domestica GN=SNRPB2 PE=4 SV=1	-
90	gi|3702320|gb|AAC62877.1|	eukaryotic translation initiation factor 3 delta subunit [Arabidopsis thaliana]	43079	MRPILMKGHERPLTFLRYNRNGDLLFSCAKDHTPTVWFADNGERLGTYRGHSGAVWCCDISRDSSRLITGSADQTAKLWDVKSGKELFTFKFGAPARSVDFSVGDHLAVITTDHFVGTSSAIHVKRIAEDPEDQVGDSVLVLQSPDGKKKINRAVWGPLNQTIVSGGEDAAIRIWDAETGKLLKQSDEEVGHKEAITSLCKAADDSHFLTGSHDKTAKLWDMRTLTLIKTYTTVVPVNAVAMSPLLNHVVLGGGQDASAVTTTDHRAGKFEAKFYDTILQEEIGGVKGHFGPINALAFSPDGKSFSSGGEDGYVRLHHFDSNYFNIKI	73|-	3.7|-	36|-	3|-	3|-	1|-	1|-	1.709	-	2	-	-	-	---	-	1	-	-	-	0.517	-	2	-	-	-	---	-	1	-	-	-	gi|3702320|gb|AAC62877.1|	100	0	gi|3702320|gb|AAC62877.1|	eukaryotic translation initiation factor 3 delta subunit [Arabidopsis thaliana]	90.85	2e-171	sp|Q38884|EIF3I_ARATH	Eukaryotic translation initiation factor 3 subunit I OS=Arabidopsis thaliana GN=TIF3I1 PE=2 SV=2	100	0	O82341	O82341_ARATH Eukaryotic translation initiation factor 3 delta subunit OS=Arabidopsis thaliana GN=At2g46290 PE=4 SV=1	MA2525
91	gi|374096147|gb|AEY84986.1|	light-regulated protein [Wolffia australiana]	16642	MQASALSFAASLPAKIVGSASAHRKLPPGVASRRRSARLPPLSASAQENLTVDYSSSTSVFPAEACETLGGDACAANVFPETKLPPANNSANANKPSSEQIDREYLDYSEPRTVFPDEVCDDLGGDFCKPEYQKA	120|97	6.7|6.7	1|1	9|6	9|6	1|1	1|1	1.159	0.74	6	4	-	*	0.535	0.799	5	4	*	-	1.779	1.841	6	4	-	*	0.917	1.115	5	4	-	-	gi|374096147|gb|AEY84986.1|	100	2e-46	gi|374096147|gb|AEY84986.1|	light-regulated protein [Wolffia australiana]	54.55	1e-17	sp|Q03200|LIRP1_ORYSJ	Light-regulated protein OS=Oryza sativa subsp. japonica GN=LIR1 PE=2 SV=1	100	3e-45	H6UGY1	H6UGY1_9ARAE Light-regulated protein OS=Wolffia australiana PE=2 SV=1	-
92	gi|1052960|gb|AAB19120.1|	PNIL34 [Ipomoea nil]	53468	MSSATTSQAAAEKGSKASTKKGIKETLLTPRFYTTDFDEMEMLFNTEINKNLNNSELRVLQEFKKDYNQTHFVRNKEFKEVADKLQGPLREIFVEFLERSCTAEFSGFLLYKELGRRLKKTNPVVAEIFSLMSRDEARHAGFLNKGLSDFNLALDLGFLTKARKYTFFKPKFIFYATYLSEKIGYWRYITIYRHLKANPEFQCYPIFKYFENWCQDENRHGDFFSALMKAQPQFLNDWKAKLWARFFCLSVYVTMYLNDCQRTAFYEGIGLDTKEFDMHVIIETNRTTARIFPAVLDVENPEFKRKLDRMVEINQKLLAVGETDDIPLVKNLKRIPLVAALVSEILAAYLMKPVESGSVDLAEFEPQLGY	106|255	11.4|11.4	-|-	4|10	1|2	3|3	1|1	---	0.907	-	2	-	-	---	0.754	-	2	-	-	---	1.077	-	2	-	-	---	0.7	-	2	-	-	gi|1052960|gb|AAB19120.1|	100	4e-07	gi|159138535|gb|ABW89270.1|	leucine zipper protein [Helianthus annuus] >gi|159138537|gb|ABW89271.1| leucine zipper protein [Helianthus annuus] >gi|159138539|gb|ABW89272.1| leucine zipper protein [Helianthus annuus] >gi|159138541|gb|ABW89273.1| leucine zipper protein [Helianthus annuus] >gi|159138543|gb|ABW89274.1| leucine zipper protein [Helianthus annuus] >gi|159138545|gb|ABW89275.1| leucine zipper protein [Helianthus annu…	91.69	0	sp|Q6SJV8|CRD1_GOSHI	Magnesium-protoporphyrin IX monomethyl ester [oxidative] cyclase, chloroplastic OS=Gossypium hirsutum GN=CRD1 PE=2 SV=2	100	0	Q40093	Q40093_IPONI PNIL34 OS=Ipomoea nil GN=PNIL 34 PE=2 SV=1	-
93	gi|356537575|ref|XP_003537302.1|	PREDICTED: serine carboxypeptidase-like 45-like [Glycine max]	58028	MTATLLLFVIAQCVVGVNSLSQADKISTLPGQPPVKFQQYAGYITVDDKQKRALFYYFVEAEVEPASKPLVLWLNGGPGCSSVGAGAFVEHGPFKPSENGLLKNEHSWNKEANMLYLESPAGVGFSYSANKSFYDFVNDEMTARDNLVFLQRWFTKFPELKNNDFFITGESYAGHYVPQLAQLIVQTKTKFNLKGIAIGNPLVEFNTDFNSRAEFFWSHGLISDSTYEIFTKVCNYSQIRRQHQGGTLTPICSGVNRLVSTEVSRYIDTYDVTLDVCLSSADQQAYVLNQLTQLGAKIDVCVEDETIAYLNRKDVQEALHAKLVGITSWSTCSDVLKYDMQNLEIPTISILGALAKSGIRVLVYSGDQDSVIPLTGTRSLVNGLAKDFGLNTTVSYRAW…	69|45	4.0|4.0	-|-	1|1	1|1	1|1	1|1	---	---	1	1	-	-	---	---	-	1	-	-	---	---	1	1	-	-	---	---	-	1	-	-	gi|356537575|ref|XP_003537302.1|	100	0	gi|356537575|ref|XP_003537302.1|	PREDICTED: serine carboxypeptidase-like 45-like [Glycine max]	64.47	4e-180	sp|Q93Y09|SCP45_ARATH	Serine carboxypeptidase-like 45 OS=Arabidopsis thaliana GN=SCPL45 PE=2 SV=1	99.56	0	I1LA88	I1LA88_SOYBN Uncharacterized protein OS=Glycine max GN=Gma.38253 PE=4 SV=1	YBR139w
94	gi|131178|sp|P12354.1|PSAE_SPIOL	RecName: Full=Photosystem I reaction center subunit IV, chloroplastic; Short=PSI-E; Flags: Precursor	16401	MASIASSVAVRLGLTQVLPNKNFSSPRSTRLVVRAAEEAAAAPAAASPEGEAPKAAAKPPPIGPKRGSKVRIMRKESYWYKGVGSVVAVDQDPKTRYPVVVRFNKVNYANVSTNNYALDEIQEVA	427|378	10.4|10.4	1|1	18|16	18|16	1|1	1|1	2.28	2.356	17	11	-	-	1.379	1.385	17	12	-	-	0.843	0.809	17	11	-	-	2.23	2.489	16	12	*	*	gi|131178|sp|P12354.1|PSAE_SPIOL	100	1e-46	gi|131178|sp|P12354.1|PSAE_SPIOL	RecName: Full=Photosystem I reaction center subunit IV, chloroplastic; Short=PSI-E; Flags: Precursor	100	4e-47	sp|P12354|PSAE_SPIOL	Photosystem I reaction center subunit IV, chloroplastic OS=Spinacia oleracea GN=PSAE-1 PE=1 SV=1	100	6e-21	A1IW05	A1IW05_9LAMI Subunit IV of photosystem I (PSI-E) (Fragment) OS=Phillyrea latifolia GN=ophe-12 PE=2 SV=1	-
95	gi|75223179|sp|O80362.1|RK10_TOBAC	RecName: Full=50S ribosomal protein L10, chloroplastic; AltName: Full=CL10; Flags: Precursor >gi|3298441|dbj|BAA31511.1| chloroplast ribosomal protein L10 [Nicotiana tabacum]	33421	MEATFFTLPSSTSHSYPFSLKSHFNNSLTLPTHPHFKPKSKNLTIRSAISRTKKEETVETVKQQLEDCYLLAGIGYKGLTVKQFQELRSQLPDTTKLLVAKNTLVLKAIEGTKWEALKPCMKGMNAWLFVHSEEIPAALKPYRTFQKEKKLEENDFTGAVFEGKFYGPEEFKALETLPTRAEIYAQLLGSLKGPASAVVGTIQAPARNLVMVLKAYVKKLEEEGGSQ	145|104	13.2|6.6	-|1	5|3	5|3	2|1	2|1	1.175	1.942	3	2	-	*	1.044	1.435	2	2	-	-	1.225	0.505	3	2	-	-	1.423	1.337	2	2	*	-	gi|75223179|sp|O80362.1|RK10_TOBAC	100	6e-130	gi|75223179|sp|O80362.1|RK10_TOBAC	RecName: Full=50S ribosomal protein L10, chloroplastic; AltName: Full=CL10; Flags: Precursor >gi|3298441|dbj|BAA31511.1| chloroplast ribosomal protein L10 [Nicotiana tabacum]	100	2e-130	sp|O80362|RK10_TOBAC	50S ribosomal protein L10, chloroplastic OS=Nicotiana tabacum GN=RPL10 PE=2 SV=1	79.55	8e-57	H9WZ70	H9WZ70_PINTA Uncharacterized protein (Fragment) OS=Pinus taeda GN=2_8252_02 PE=4 SV=1	TM0456
96	gi|460379895|ref|XP_004235695.1|	PREDICTED: N-alpha-acetyltransferase 16, NatA auxiliary subunit-like [Solanum lycopersicum]	128852	MGASLPPKEANLFKLIVKSYETKQYKKGLKAADTILKKFPNHGETLSMKGLTLNCMDRKSEAYELVRLGLKNDLKSHVCWHVYGLLYRSDREYREAIKCYRNALRIDPDNIEILRDLSLLQAQMRDLEGFVETRQQLLTLKPNHRMNWIGFAVAHHLNSNGSKAVDILEAYEGTLDDDYPPENERCEHGEMLLYKISLLEECGFPERALEELRKKESKMVDKLDYKEQEALLILKLGRFEEGEKLFRVLLTMNPDNYRYYDGLQRCLGLYSEKGQYTADEIDRLENLYRVLAHQYSRSSAVKRIPLDFLQDDKFREAADNYIRPLLTKGVPSLFSDLYPLYDHPGKADILGEIVLKLEQSLKSTGGYPGRVEKEPPSTLMWTLFYLAQHYDRREQYDIA…	20|-	1.0|-	-|-	1|-	1|-	1|-	1|-	---	-	-	-	-	-	---	-	-	-	-	-	---	-	-	-	-	-	---	-	-	-	-	-	gi|460379895|ref|XP_004235695.1|	100	0	gi|460379895|ref|XP_004235695.1|	PREDICTED: N-alpha-acetyltransferase 16, NatA auxiliary subunit-like [Solanum lycopersicum]	47.88	2e-148	sp|Q5R4J9|NAA15_PONAB	N-alpha-acetyltransferase 15, NatA auxiliary subunit OS=Pongo abelii GN=NAA15 PE=2 SV=1	89.92	2e-134	B9GWR3	B9GWR3_POPTR Predicted protein OS=Populus trichocarpa GN=POPTRDRAFT_553694 PE=4 SV=1	YDL040c
97	gi|118488335|gb|ABK95986.1|	unknown [Populus trichocarpa]	42283	MASLVGTLHAGFNNRIAPLTSTTPTPSLASSFVNSTKTQVPKVFLKSRFLGKNVNFVEIRRKTKIPLSHGGSSIRMSWDGPLSSVKLIIQGKHLELSDTVKKHVEDKVGKAVQKSSHLVRGVDVRLSVRGGELGKGPRIRRCEVTLFTKRHGVVRAEEDAETIHASIDLVSSIIQRKLRKIKDKESDHGRHMKGFNRLKVREPMHQVVVEDDADEVSQQEDEDYIEEVVRTKYFDMPPLTVSEAIEQLEHVHHDFYGFRDEETGEINIIYKRKAGGYGLIIPKGNGEAERLEPLVVEPAREPSLAE	-|28	-|3.3	-|4	-|2	-|2	-|1	-|1	-	---	-	-	-	-	-	---	-	-	-	-	-	---	-	-	-	-	-	---	-	-	-	-	gi|118488335|gb|ABK95986.1|	100	1e-166	gi|118488335|gb|ABK95986.1|	unknown [Populus trichocarpa]	64.94	1e-94	sp|P19954|PRSP1_SPIOL	Ribosome-binding factor PSRP1, chloroplastic OS=Spinacia oleracea GN=PSRP1 PE=1 SV=2	100	1e-165	A9PHY3	A9PHY3_POPTR Putative uncharacterized protein OS=Populus trichocarpa PE=2 SV=1	all3184
98	gi|161777971|gb|ABX79323.1|	ribulose-1,5-bisphosphate carboxylase/oxygenase large subunit [Coptosapelta tomentosa]	59300	SVGFKAGVKEYKLTYYTPEYETKDTDILAAFRVTPQPGVPPEEAGAAVAAESSTGTWTTVWTDGLTSLDRYKGRCYHIEPVPGEEDQYICYVAYPLDLFEEGSVTNMFTSIVGNVFGFKALRALRLEDLRIPPAYIKTFQGPPHGIQVERDKLNKYGRPLLGCTIKPKLGLSAKNYGRAVYECLRGGLDFTKDDENVNSQPFMRWRDRFLFCAEALYKAQAETGEIKGHYLNATAGTCEEMIKRAVFARELGVPIVMHDYLTGGFTANTSLAHYCRDNGLLLHIHRAMHAVIDRQKNHGMHFRVLAKALRMSGGDHIHAGTVVGKLEGERDITLGFVDLLRDNFIEKDRSRGIYFTQDWVSLPGVIPVASGGIHVWHMPALTEIFGDDSVLQFGGGTLG…	-|951	-|26.1	-|-	-|78	-|1	-|9	-|1	-	---	-	-	-	-	-	---	-	-	-	-	-	---	-	-	-	-	-	---	-	-	-	-	gi|161777971|gb|ABX79323.1|	100	0	gi|161777971|gb|ABX79323.1|	ribulose-1,5-bisphosphate carboxylase/oxygenase large subunit [Coptosapelta tomentosa]	97.86	0	sp|Q37282|RBL_TABHE	Ribulose bisphosphate carboxylase large chain (Fragment) OS=Tabebuia heterophylla GN=rbcL PE=3 SV=1	100	0	B3THI0	B3THI0_9GENT Ribulose-1,5-bisphosphate carboxylase/oxygenase large subunit (Fragment) OS=Coptosapelta tomentosa GN=rbcL PE=3 SV=1	alr1524
99	gi|470127151|ref|XP_004299539.1|	PREDICTED: uncharacterized protein LOC101310607 [Fragaria vesca subsp. vesca]	40231	MGTALDSHFLALTAIVTVAYQGLFFVITALLKFDKVTDFAGSTNFVILAILTLVVKGSWHFRQVVLSLLVVLWGLRLGLFLLTRILQWGEDRRFDEMRANLGKLAVFWIFQAVWVWTVSLPVTVVNSSNKTPSLQAADFIGWIMWSVGFLVEATADQQKLVFKNSPENRGKWCNVGLWKYTRHPNYFGEIFLWWGVFVASTPVLDGAEWLVILGPIFLTLLLLFLSGIPLLEESADKKFGNVDAYRLYKRSTSPLVPLPPVVYKNLPSWFKATFLFEFPLYSRNLPQEPPNWCRTNPVEKSDELKIG	-|33	-|3.9	-|-	-|1	-|1	-|1	-|1	-	---	-	-	-	-	-	---	-	-	-	-	-	---	-	-	-	-	-	---	-	-	-	-	gi|470127151|ref|XP_004299539.1|	100	4e-142	gi|470127151|ref|XP_004299539.1|	PREDICTED: uncharacterized protein LOC101310607 [Fragaria vesca subsp. vesca]	-	-	-	-	84.25	1e-109	B9IEB0	B9IEB0_POPTR Predicted protein OS=Populus trichocarpa GN=POPTRDRAFT_900773 PE=4 SV=1	lin0600
100	gi|449464176|ref|XP_004149805.1|	PREDICTED: proteasome subunit beta type-3-A-like [Cucumis sativus]	27103	MSIFEYNGSAVVAMVGKNCFAIASDRRLGVQLQTIATDFQKIYRIHDKLFLGLSGLGTDAQTLYQRLVFRHKLYQLREERDMKPETFASLVSAILYEKRFGPYFCQPVIAGLSDEDKPFICTMDSIGAKELAKDFVVSGTASESLYGACEAMFKPDMEPEELFETISQALLSSVDRDCLSGWGGHVYVVTPTEVKERILKGRMD	-|27	-|6.9	-|-	-|1	-|1	-|1	-|1	-	---	-	-	-	-	-	---	-	-	-	-	-	---	-	-	-	-	-	---	-	-	-	-	gi|449464176|ref|XP_004149805.1|	100	8e-118	gi|449464176|ref|XP_004149805.1|	PREDICTED: proteasome subunit beta type-3-A-like [Cucumis sativus]	93.14	1e-110	sp|O81153|PSB3B_ARATH	Proteasome subunit beta type-3-B OS=Arabidopsis thaliana GN=PBC2 PE=1 SV=1	96.75	2e-64	C6T326	C6T326_SOYBN Putative uncharacterized protein OS=Glycine max PE=2 SV=1	YER094c
101	gi|16604368|gb|AAL24190.1|	At2g19940/F6F22.3 [Arabidopsis thaliana] >gi|19699208|gb|AAL90970.1| At2g19940/F6F22.3 [Arabidopsis thaliana]	51722	MSTASAFSSIQGCWFKGERKIRVADKRAKRLTLGSHVASPSSMSFRVSASSSVKPEKDIRIGLLGASGYTGAEIVRLLANHPHFQVTLMTADRKAGQSMESVFPHLRVQKLPTLVSVKDADFSTVDAVFCCLPHGTTQEIIKELPTALKIVDLSADFRLRNIAEYEEWYGQPHKAVELQKEVVYGLTEILREDIKKARLVANPGCYPTTIQLPLVPLLKANLIKHENIIIDAKSGVSGAGRGAKEANLYSEIAEGISSYGVTRHRHVPEIEQGLSDVAQSKVTVSFTPHLMPMIRGMQSTIYVEMAPGVRTEDLHQQLKTSYEDEEFVKVLDEGVVPRTHNVRGSNYCHMSVFPDRIPGRAIIISVIDNLVKGASGQALQNLNIMLGYPETTGLLHQPL…	-|59	-|3.0	-|27	-|1	-|1	-|1	-|1	-	---	-	1	-	-	-	---	-	1	-	-	-	---	-	1	-	-	-	---	-	1	-	-	gi|16604368|gb|AAL24190.1|	100	0	gi|16604368|gb|AAL24190.1|	At2g19940/F6F22.3 [Arabidopsis thaliana] >gi|19699208|gb|AAL90970.1| At2g19940/F6F22.3 [Arabidopsis thaliana]	99.75	0	sp|Q93Z70|ARGC_ARATH	Probable N-acetyl-gamma-glutamyl-phosphate reductase, chloroplastic OS=Arabidopsis thaliana GN=At2g19940 PE=1 SV=2	99.75	0	C0Z2J2	C0Z2J2_ARATH N-acetyl-gamma-glutamyl-phosphate reductase OS=Arabidopsis thaliana GN=AT2G19940 PE=2 SV=1	PA0662
102	gi|145352931|ref|XP_001420787.1|	Ribosomal protein S25, component of cytosolic 80S ribosome and 40S small subunit [Ostreococcus lucimarinus CCE9901] >gi|144581022|gb|ABO99080.1| Ribosomal protein S25, component of cytosolic 80S ribosome and 40S small subunit [Ostreococcus lucimarin	13535	KWSKGKMKEKANNQVLFEQSTYDKLLAEVPKYKMITISILCDRLRITCSLARKGIAILLAKGLIKPLVLHSKQHIYTTAVATEA	18|-	16.7|-	2|-	1|-	1|-	1|-	1|-	---	-	-	-	-	-	---	-	-	-	-	-	---	-	-	-	-	-	---	-	-	-	-	-	gi|145352931|ref|XP_001420787.1|	100	2e-42	gi|145352931|ref|XP_001420787.1|	Ribosomal protein S25, component of cytosolic 80S ribosome and 40S small subunit [Ostreococcus lucimarinus CCE9901] >gi|144581022|gb|ABO99080.1| Ribosomal protein S25, component of cytosolic 80S ribosome and 40S small subunit [Ostreococcus lucimarinus CCE9901]	63.01	2e-19	sp|Q8GYL5|RS253_ARATH	40S ribosomal protein S25-3 OS=Arabidopsis thaliana GN=RPS25D PE=3 SV=2	100	3e-41	A4S5K3	A4S5K3_OSTLU Ribosomal protein S25, component of cytosolic 80S ribosome and 40S small subunit (Fragment) OS=Ostreococcus lucimarinus (strain CCE9901) GN=RPS25 PE=4 SV=1	YLR333c
103	gi|41350583|gb|AAS00532.1|	putative adenosine kinase [Populus tremula x Populus alba]	31328	RXAQWMLQIPGATSYMGCIGKDKFGEEMKKNSMKAGVNVHYYEDEAAPTGTCAVCVVGGERSLIANLSAANCYKSEHLKRPENWALVEKAKYFYIAGFFLTVSPESIMLVAEHAAANNKVFMMNLSAPFICEFFKDVQENALPYMDYVFGNETEARTFAKVHGWETENVEEIALKISQWPKASGAHKRITVITQGADPVVVAEDGKLKLFPVILLPKEKLVDTNG	163|-	8.0|-	25|-	4|-	4|-	1|-	1|-	1.397	-	4	-	-	-	1.219	-	4	-	-	-	0.945	-	4	-	-	-	1.406	-	4	-	-	-	gi|41350583|gb|AAS00532.1|	100	1e-130	gi|41350583|gb|AAS00532.1|	putative adenosine kinase [Populus tremula x Populus alba]	84	5e-113	sp|Q9LZG0|ADK2_ARATH	Adenosine kinase 2 OS=Arabidopsis thaliana GN=ADK2 PE=1 SV=1	100	1e-129	Q6SV73	Q6SV73_POPCN Putative adenosine kinase (Fragment) OS=Populus canescens PE=2 SV=1	SPCC338.14
104	gi|146741370|dbj|BAF62340.1|	glutamine synthetase [Avicennia marina]	56834	MAQILAPSAQWQMRIAKNSIDASPLSTKTWSSLILKQNKKEAVKSPGKFRVLAVKSENSTVNRLEQMLNLDVTPYTDKIIAEYIWIGGSGIDLRSKSRTIPKPVEHPSELPKWNYDGSSTGQAPGEDSEVILYPQAIFKDPFRGGNNILVTCDTYTPQGEPIPTNKRYRAAQIFSDPKVAADIPWFGIEQEYTLLQPNVQWPLGWPAGGYPGPQGPYYCGVGADKSFGRDISDAHYKACLYSGINISGTNGEVMPGQWEFQVGPSVGIEAGDHIWCSRYLLERITEQAGVVLSLDPKPIEGDWNGAGCHTNYSTKSMREEGGLEVIKKAILNLSLRHKEHISAYGEGNERRLTGKHETANIDTFSWGVANRGCSIRVGRDTEKKGKGYLEDRRPASNMD…	135|274	11.8|11.8	-|-	8|11	4|6	3|3	1|1	1.249	0.85	2	4	-	-	1.168	0.473	2	4	-	*	1.03	1.611	2	4	-	-	1.35	0.759	2	4	-	-	gi|146741370|dbj|BAF62340.1|	100	0	gi|146741370|dbj|BAF62340.1|	glutamine synthetase [Avicennia marina]	87.57	0	sp|P14655|GLNA2_ORYSJ	Glutamine synthetase, chloroplastic OS=Oryza sativa subsp. japonica GN=GLN2 PE=1 SV=1	100	0	A5A7P7	A5A7P7_AVIMR Glutamine synthetase OS=Avicennia marina PE=2 SV=1	YPR035w
105	gi|116782114|gb|ABK22375.1|	unknown [Picea sitchensis]	46430	MTGRTLSGNSYYGKYSEELIATANYIATPGKGILAADESTGTIGKRLSSINVENVEVNRRSLRELLFTTPGALQYLSGVIFFEETLYQSTASGKPFVEVLQEAGVVPGIKVDKGTVDLAATNGETTTQGLDGLAQRCQQYYKAGARFAKWRAVLKIGPTEPSELSIEQNAQGLARYAIICQENGLVPIVEPEILTDGSHDIHKCAAVTENVVAAVYKALNDHHVLLEGTLLKPNMVLPGTDGPKAPPEEIAEHTVRALQRTVPAAVPGIVFLSGGQSEEEATLNLNAINACKTKKPWTLSFSFGRALQQSTLKTWAGKAENLGAAQKAFLARCKANSEATLGKYAGGAGAGLATESLYVKDYKY	-|744	-|15.7	-|1	-|20	-|13	-|3	-|2	-	0.61	-	10	-	*	-	1.324	-	9	-	*	-	1.091	-	11	-	-	-	0.693	-	8	-	*	gi|116782114|gb|ABK22375.1|	100	0	gi|116782114|gb|ABK22375.1|	unknown [Picea sitchensis]	80.34	1e-161	sp|P46256|ALF1_PEA	Fructose-bisphosphate aldolase, cytoplasmic isozyme 1 OS=Pisum sativum PE=2 SV=1	100	0	A9NP14	A9NP14_PICSI Fructose-bisphosphate aldolase OS=Picea sitchensis PE=2 SV=1	AGl2190
106	gi|45433311|emb|CAD27459.1|	nucleosome assembly protein 1-like protein 2 [Oryza sativa]	53159	MSDGKDSLDLSGLGAAVPNAKELSAEDKANLVESIKNTLQGLAARHTDVLESLEPKVRKRVEVLREIQSQHDDLEAKFFEERAALEAKYQKMYEPLYSKRYEIVNGVVEVDGVTKEAADETPAEQKEEKGVPEFWLNAMKNHEILSEEIQERDEEALKYLKDIKWYRISEPKGFKLEFYFDTNPFFKNSVLTKTYHMIDEDEPILEKAIGTEIEWFPGKCLTQKVLKKKPKKGSKNTKPITKTENCESFFNFFSPPQVPDDDEEIDEDTAEQLQNQMEQDYDIGSTIRDKIIPHAVSWFTGEAAQDEDFEGIMDDEDDDDEDDDDDEDEDDEDDDEDDEDEKKGGRVPSGEGQQGERPAECKQQ	33|119	3.3|3.3	3|3	1|4	1|4	1|1	1|1	---	0.308	-	3	-	*	---	0.462	-	2	-	*	---	2.807	-	3	-	-	---	0.273	-	2	-	-	gi|45433311|emb|CAD27459.1|	100	1e-177	gi|45433311|emb|CAD27459.1|	nucleosome assembly protein 1-like protein 2 [Oryza sativa]	42.86	3e-07	sp|Q9ULW6|NP1L2_HUMAN	Nucleosome assembly protein 1-like 2 OS=Homo sapiens GN=NAP1L2 PE=2 SV=1	100	2e-176	B8AW64	B8AW64_ORYSI Putative uncharacterized protein OS=Oryza sativa subsp. indica GN=OsI_20803 PE=3 SV=1	-
107	gi|428176132|gb|EKX45018.1|	hypothetical protein GUITHDRAFT_109062 [Guillardia theta CCMP2712]	53970	MSADIGLVIKWIPDKKVYRIIGFHTNGSAKQTGMLNINDTLLEVNKESVSGLAQKDVEAKLRGEPGSKVRLKVSRGDDSFHCTIGRTDLHSFVVKKTKEAPVKEPEPKKKKLTDREKADKLLNQGTGKYSGASFGSALEKVSDREASRIRGQTQKEHERVQAEADRLYEETVKKDREEQDKNVHDSVNRFCDQCGAPRQEKKAPVEKQAPVQEGKENHFALGDCMRPRKAEEPAKKVEEKPWWSWSSDSSKSNAKSASGGGWFTKKDEKPQKSRFKDRLNQAKFSFAMSIIDYRIRKTNEEFMAVITGKSKDSKSKKSPKTKDDSKSSFWNFSSGK	34|31	4.8|4.8	-|-	1|1	1|1	1|1	1|1	---	---	-	-	-	-	---	---	-	-	-	-	---	---	-	-	-	-	---	---	-	-	-	-	gi|428176132|gb|EKX45018.1|	100	2e-146	gi|428176132|gb|EKX45018.1|	hypothetical protein GUITHDRAFT_109062 [Guillardia theta CCMP2712]	-	-	-	-	-	-	-	-	-
108	gi|24638017|sp|P83373.1|MDHM_FRAAN	RecName: Full=Malate dehydrogenase, mitochondrial; Flags: Precursor	43433	MRPSMSLIRSVSRVARRGYSSESVPQRKVAVLGAAGGIGQPLALLMKLNPLVSQLSLYDIAGTPGVAADVSHINTRSEVKGYAGEEQLGEALEGCDVVIIPAGVPRKPGMTRDDLFNINAGIVRSLTAAIAKYCPHAIINMISNPVNSTVPIASEVLKKAGVYDEKKLFGVTTLDVVRAKTFYAGKAGVPVAEVNVPVVGGHAGITILPLFSQATPKANLSDDYIKALTKRTQDGGTEVVEAKAGKGSATLSMAYAGALFADACLXGLNGVPDVVECSYVQSSITELPFFASKVRLGKNGVEEVLDLGPLSDFEKEGLKQLKPELKSSIEKGIKFANQS	372|351	17.7|17.7	1|1	16|14	1|3	4|4	1|1	---	---	1	-	-	-	---	---	1	1	-	-	---	---	1	1	-	-	---	---	1	-	-	-	gi|24638017|sp|P83373.1|MDHM_FRAAN	100	3e-174	gi|24638017|sp|P83373.1|MDHM_FRAAN	RecName: Full=Malate dehydrogenase, mitochondrial; Flags: Precursor	100	1e-174	sp|P83373|MDHM_FRAAN	Malate dehydrogenase, mitochondrial OS=Fragaria ananassa GN=MMDHI PE=1 SV=1	89.68	4e-156	G3BMW0	G3BMW0_PYRPY Malate dehydrogenase OS=Pyrus pyrifolia PE=2 SV=1	YPO3516
109	gi|6143893|gb|AAF04439.1|AC010718_8	thioredoxin-like protein; 49720-48645 [Arabidopsis thaliana]	21917	MASISLSSSTVPSLNSKESSGVSAFASRSISAVKFQFPVRRIEAKKQTFDSFEDLLVNSDKPVLVDYYATWCGPCQFMVPILNEVSETLKDKIQVVKIDTEKYPSIANKYKIEALPTFILFKDGEPCDRFEGALTAKQLIQRIEDSLKVKP	54|71	7.3|7.3	4|4	2|3	2|3	1|1	1|1	---	0.619	-	2	-	-	---	0.835	-	2	-	-	---	1.922	-	2	-	-	---	0.944	-	2	-	-	gi|6143893|gb|AAF04439.1|AC010718_8	100	3e-74	gi|6143893|gb|AAF04439.1|AC010718_8	thioredoxin-like protein; 49720-48645 [Arabidopsis thaliana]	86.54	7e-71	sp|Q6NPF9|TRXY1_ARATH	Thioredoxin Y1, chloroplastic OS=Arabidopsis thaliana GN=At1g76760 PE=2 SV=1	83.49	4e-48	C6T2G9	C6T2G9_SOYBN Uncharacterized protein OS=Glycine max GN=Gma.6029 PE=2 SV=1	all1893
110	gi|397600688|gb|EJK57696.1|	hypothetical protein THAOC_22230 [Thalassiosira oceanica]	35336	MSSTSTGCDDDATLSGSPDVKALAIQFIWQRGGPRDNGLSNPGLGGSVSAQRTSRIDCLQRLWCRAQVVPRVPPVESRTKSASQVEGVDAVAEKPYAIQRITGITGTTTCIVQHNKVHRFVAWRMFALGRRLERESQSINKRACLHVCLAGAAQGRAPSVSEASHFYTSDWSLSTIEKATYSWKKLDGFKSRRSAVRTACLAVRLLRSSCGPAAVRLRSGPHDLRMRSGPLSTSILLPPLALRCQLGVRVLVCWEYKAKPDRHHRRRSSTTSSAEHEVRSLED	37|-	3.5|-	-|-	1|-	1|-	1|-	1|-	---	-	-	-	-	-	---	-	-	-	-	-	---	-	-	-	-	-	---	-	-	-	-	-	gi|397600688|gb|EJK57696.1|	100	1e-148	gi|397600688|gb|EJK57696.1|	hypothetical protein THAOC_22230 [Thalassiosira oceanica]	-	-	-	-	-	-	-	-	-
111	gi|308803294|ref|XP_003078960.1|	guanine nucleotide exchange family protein (ISS) [Ostreococcus tauri] >gi|116057413|emb|CAL51840.1| guanine nucleotide exchange family protein (ISS) [Ostreococcus tauri]	216598	MRASSASWHVEQALTPCREACERRGKARGAAAVATATTALDEALRVARDGSLEALANDGTSASTSSERLNVRQLDVVVPAIVASMESGSTSVMNAALGATQYLIARGIVAGCARAPPGEVERTESSSDVFNVEEIPANSPSEGVAERSAERAEHDSERHAWDIVDAICGAADVRDEALELQVLKSVLTATSSSTFEVHDRALLRTVRTCYNIYLSSKSEVNQNTAKATLTQMLTTVFHRLERDDPHASAPTIVVADLLRPIGSSTDVDSVTTMSNAVQSFMNKVATDMNSVGSLSYFADPDTAVKSDALEREITDGEFDHDTAPMTPVKTATQALEDVSSPITKSCLGNGTSDLELDAFLVFRSLCKLAKKPGSELNGAALVRSKIIALQLLKIIIENA…	25|-	0.9|-	-|-	1|-	1|-	1|-	1|-	---	-	-	-	-	-	---	-	-	-	-	-	---	-	-	-	-	-	---	-	-	-	-	-	gi|308803294|ref|XP_003078960.1|	100	0	gi|308803294|ref|XP_003078960.1|	guanine nucleotide exchange family protein (ISS) [Ostreococcus tauri] >gi|116057413|emb|CAL51840.1| guanine nucleotide exchange family protein (ISS) [Ostreococcus tauri]	53.33	6e-48	sp|Q9QX11|CYH1_MOUSE	Cytohesin-1 OS=Mus musculus GN=Cyth1 PE=2 SV=2	100	0	Q01AF8	Q01AF8_OSTTA Guanine nucleotide exchange family protein (ISS) OS=Ostreococcus tauri GN=Ot04g04420 PE=4 SV=1	SPAC4D7.01c
112	gi|38112662|gb|AAR11379.1|	triose phosphate isomerase cytosolic isoform [Solanum chacoense]	32423	MGRTFFVGGNWKCNGTSEEIKKIVATLNAGQVPSQDVVEVVVSPPYVFLPLVKNELRSDFHVAAQNCWVKKGGAFTGEVSADMLVNLGIPWVILGHSERRAILGESNEFVGDKVAYALSQGLRVIACVGETLEQRESGSTMDVVAAQTKAIAERVKDWSNVVVAYEPVWAIGTGKVATPAQAQEVHAELRKWLQANVSAEVAASTRIIYGGSVSGANCKELAGQPDVDGFLVGGASLKPEFIDIIKAAEVKKGA	220|-	8.7|-	2|-	10|-	10|-	2|-	2|-	0.627	-	7	-	*	-	1.221	-	7	-	*	-	1.224	-	7	-	*	-	0.848	-	7	-	-	-	gi|38112662|gb|AAR11379.1|	100	8e-133	gi|38112662|gb|AAR11379.1|	triose phosphate isomerase cytosolic isoform [Solanum chacoense]	91.73	6e-124	sp|P48495|TPIS_PETHY	Triosephosphate isomerase, cytosolic OS=Petunia hybrida GN=TPIP1 PE=2 SV=1	100	8e-132	Q6T379	Q6T379_SOLCH Triosephosphate isomerase OS=Solanum chacoense PE=2 SV=1	SPCC24B10.21
113	gi|449436467|ref|XP_004136014.1|	PREDICTED: probable pectinesterase/pectinesterase inhibitor 40-like [Cucumis sativus]	69389	MYGLRNRAQISSNPTSISTISTISPFFFIFFLFSFKPISSNPQVHQTARSLCNGTLFPDLCFSKLSSFPQLASLSPEKLAGSALNFTSREVLLAYTNCTNLKTHLYSGLNPTDRHALDDCLELLDGSIAELKASIFDLAPSQSPALHSHDLLTLVSAAMTNHRTCVDGFYNSSGTVRSRVELYLGKIGQHLSIDLAMLKKIPGVNRATGVDQEMLPEYGAVKGGFPKWVSVKDRRLLQAAVNETKFNMVVAKDGSGNFTTVSEAVAAAPNASTTRFVIYIKAGAYFENVEIGRAKSNLMFVGDGIGKTLIKADRNVVDGWTTFRSATVAVVGTGFIAKGITFENYAGPSKHQAVALRSNSDFSAFYQCSFIGYQDTLYVHSLRQFYRDCDVYGTIDFIF…	-|63	-|2.1	-|3	-|1	-|1	-|1	-|1	-	---	-	1	-	-	-	---	-	1	-	-	-	---	-	1	-	-	-	---	-	1	-	-	gi|449436467|ref|XP_004136014.1|	100	0	gi|449436467|ref|XP_004136014.1|	PREDICTED: probable pectinesterase/pectinesterase inhibitor 40-like [Cucumis sativus]	77.19	9e-143	sp|P85076|PME_ACTDE	Pectinesterase OS=Actinidia deliciosa PE=1 SV=1	82.67	2e-137	Q9M5J0	Q9M5J0_VIGRR Pectinesterase (Fragment) OS=Vigna radiata var. radiata GN=PME2 PE=2 SV=1	CAC3373
114	gi|295831287|gb|ADG39312.1|	AT5G63680-like protein [Capsella grandiflora] >gi|295831289|gb|ADG39313.1| AT5G63680-like protein [Capsella grandiflora] >gi|295831291|gb|ADG39314.1| AT5G63680-like protein [Capsella grandiflora] >gi|295831293|gb|ADG39315.1| AT5G63680-like protein [	22304	VTATQMLESMIKSPRPTRAEATDVANAVLDGTDCVMLSGESAAGAYPEIAVKTMAKICIEAESSLDYNTIFKEMIRATPLPMSTLESLASSAVRTANKAKAKLIIVLTRGGTTAKLVAKYRPAVPILSVVVPVFTSDTFNWSCSDESPARHSLIYRGLIPVLAEGSAKATDSESTEE	49|48	6.8|6.8	1|1	2|1	2|1	1|1	1|1	0.844	---	2	1	-	-	0.888	---	2	1	-	-	0.85	---	2	1	-	-	0.573	---	2	1	-	-	gi|295831287|gb|ADG39312.1|	100	5e-98	gi|295831287|gb|ADG39312.1|	AT5G63680-like protein [Capsella grandiflora] >gi|295831289|gb|ADG39313.1| AT5G63680-like protein [Capsella grandiflora] >gi|295831291|gb|ADG39314.1| AT5G63680-like protein [Capsella grandiflora] >gi|295831293|gb|ADG39315.1| AT5G63680-like protein [Capsella grandiflora] >gi|295831295|gb|ADG39316.1| AT5G63680-like protein [Neslia paniculata]	89.2	6e-89	sp|Q42806|KPYC_SOYBN	Pyruvate kinase, cytosolic isozyme OS=Glycine max PE=2 SV=1	100	5e-97	D6PSI0	D6PSI0_9BRAS Pyruvate kinase (Fragment) OS=Capsella grandiflora PE=3 SV=1	YAL038w
115	gi|15232844|ref|NP_186857.1|	40S ribosomal protein S19-1 [Arabidopsis thaliana] >gi|27923843|sp|Q9SGA6.1|RS191_ARATH RecName: Full=40S ribosomal protein S19-1 >gi|332640239|gb|AEE73760.1| 40S ribosomal protein S19-1 [Arabidopsis thaliana]	19830	MATGKTVKDVSPHDFVKAYASHLKRSGKIELPTWTDIVKTGKLKELAPYDPDWYYIRAASMARKVYLRGGLGVGAFRRIYGGSKRNGSRPPHFCKSSGGIARHILQQLETMNIVELDTKGGRRITSSGQRDLDQVAGRIAVEP	210|103	15.4|15.4	5|5	12|9	7|3	2|2	1|1	1.677	---	6	1	*	-	0.97	---	5	1	-	-	0.348	---	6	1	*	-	0.474	---	5	1	*	-	gi|15232844|ref|NP_186857.1|	100	1e-77	gi|297832838|ref|XP_002884301.1|	40S ribosomal protein S19 [Arabidopsis lyrata subsp. lyrata] >gi|297330141|gb|EFH60560.1| 40S ribosomal protein S19 [Arabidopsis lyrata subsp. lyrata]	100	6e-80	sp|Q9SGA6|RS191_ARATH	40S ribosomal protein S19-1 OS=Arabidopsis thaliana GN=RPS19A PE=2 SV=1	100	1e-76	D7LAK3	D7LAK3_ARALL 40S ribosomal protein S19 OS=Arabidopsis lyrata subsp. lyrata GN=ARALYDRAFT_477436 PE=4 SV=1	SPBC649.02
116	gi|49388256|dbj|BAD25374.1|	hypothetical protein [Oryza sativa Japonica Group] >gi|49388928|dbj|BAD26150.1| hypothetical protein [Oryza sativa Japonica Group]	22640	MNSRDQIPFLVYPRHEIVRARLAKEDGGHQEQQTVFEVKGDGHDSKKNTLPSASPSAATAPSALASTIVASESLPEELEQNHALLPTVKAQPILSAPKILSSSDLTSSTVTTTGTAANSEGKTAMVAATVCSMKGSLEKGPTNPRVTREHVVGSRGLCRLTVSQEGVGEGVLEGRGSCQITVPCH	34|-	6.5|-	1|-	1|-	1|-	1|-	1|-	---	-	-	-	-	-	---	-	-	-	-	-	---	-	-	-	-	-	---	-	-	-	-	-	gi|49388256|dbj|BAD25374.1|	100	1e-67	gi|49388256|dbj|BAD25374.1|	hypothetical protein [Oryza sativa Japonica Group] >gi|49388928|dbj|BAD26150.1| hypothetical protein [Oryza sativa Japonica Group]	-	-	-	-	100	1e-66	Q6H549	Q6H549_ORYSJ Putative uncharacterized protein OSJNBa0047A17.30 OS=Oryza sativa subsp. japonica GN=OSJNBa0047A17.30 PE=4 SV=1	-
117	gi|19817|emb|CAA45741.1|	C-7 [Nicotiana tabacum]	33549	MADEVVLLDTYVSMFGVSVRIALAEKGIQYEYKEQDLLNKTPLLLQMNPIHKKIPVLIHNGKPICESLIIVEYIDEVWKDKSPFMPSDPYKRAQARFWADYVDKKIYESGKKMWTSKVEDQEAANKEFIECLKLLEGELGDKPYFGGERFGFVDMALMPYYSWFPSYEKFGNFSIEAECPKIVEWAKKCVQKESVSKSLADPDKVYDYIVMARQKWGIA	31|-	5.5|-	-|-	1|-	1|-	1|-	1|-	---	-	-	-	-	-	---	-	-	-	-	-	---	-	-	-	-	-	---	-	-	-	-	-	gi|19817|emb|CAA45741.1|	100	2e-125	gi|19817|emb|CAA45741.1|	C-7 [Nicotiana tabacum]	72.35	3e-91	sp|Q03666|GSTX4_TOBAC	Probable glutathione S-transferase OS=Nicotiana tabacum PE=2 SV=1	100	2e-124	Q40480	Q40480_TOBAC C-7 protein OS=Nicotiana tabacum GN=C-7 PE=2 SV=1	sspA
118	gi|281399029|gb|ADA68360.1|	hsp organizing protein/stress-inducible protein [Dactylis glomerata]	82741	MADEAKAKGNAAFSAGKFEEAAGHFTDAIALAPGNHVLYSNRSAALASIHRYSDALADAEKTVELKPDWAKGYSRLGAAHLGLGDAASAVAAYEKGLALDPSNEALKGGLADAKKAAAAPPRRSPSGGGADAIGQMFQGPELWSKIAADPSTRAYLDQPDFMQMLREVQRNPSSLNMYLSDPRMMQVLSLMLNIKIQTSDDPDLPQTSSPPPPQQPKPETKAREVEPEPVPEPMEVSDEEKERKERKAAAQKEKEAGNASYKKKDFETAIQHYTKALELDDEDISFLTNRAAVYIEMGKYDECIKDCDKAVERGRELRADFKMVARALTRKGTALAKLAKNSKDYDIAIETFQKALTEHRNPDTLKRLNEAEKAKKDLEQQEYYDPKLADEEREKGNEM…	-|53	-|2.6	-|2	-|2	-|2	-|1	-|1	-	---	-	-	-	-	-	---	-	-	-	-	-	---	-	1	-	-	-	---	-	-	-	-	gi|281399029|gb|ADA68360.1|	100	0	gi|281399029|gb|ADA68360.1|	hsp organizing protein/stress-inducible protein [Dactylis glomerata]	78.93	2e-151	sp|Q43468|STIP_SOYBN	Heat shock protein STI OS=Glycine max GN=STI PE=2 SV=1	100	0	D2E9R6	D2E9R6_DACGL Hsp organizing protein/stress-inducible protein OS=Dactylis glomerata PE=2 SV=1	SPAC17G6.19c
119	gi|356521795|ref|XP_003529536.1|	PREDICTED: dihydrolipoyl dehydrogenase-like [Glycine max]	78826	MHSSLSLSFSATSSSAATVSRSRHSFHSPAVATPLNLRFCGLRREAFASGLAASRNRHHSHLPRRPRSAAVSAALSSNGIPPKSFDYDLLIIGAGVGGHGAALHAVEKGLKTAIVEGDVVGGTCVNRGCVPSKALLAVSGRMRELKSDHHLKSFGLQVSAAGYDRQGVADHANNLASKIRNNLTNSMKALGVDILTGFGTILGPQKVKVGSSDKIVTAKDIIIATGSVPFVPKGIEIDGKTVITSDHALKLESVPDWIAIVGSGYIGLEFSDVYTALGSEVTFIEALDQLMPGFDPEISKLAQRVLINPRNIDYHTGVFATKITPARDGKPVLIELIDAKTKEPKDTLEVDAALIATGRAPFTQGLGLENIDVVTQRGFVPVDERMRVIDANGKLVPHL…	214|271	7.3|7.3	1|1	8|8	1|2	3|3	1|1	---	0.281	1	2	-	-	---	0.842	1	2	-	-	---	2.73	1	2	-	*	---	0.613	1	2	-	-	gi|356521795|ref|XP_003529536.1|	100	0	gi|356521795|ref|XP_003529536.1|	PREDICTED: dihydrolipoyl dehydrogenase-like [Glycine max]	62.74	6e-159	sp|P72740|DLDH_SYNY3	Dihydrolipoyl dehydrogenase OS=Synechocystis sp. (strain PCC 6803 / Kazusa) GN=lpdA PE=1 SV=3	100	0	I1KMS9	I1KMS9_SOYBN Uncharacterized protein OS=Glycine max GN=Gma.28989 PE=4 SV=1	alr4745
120	gi|462411761|gb|EMJ16810.1|	hypothetical protein PRUPE_ppa007812mg [Prunus persica]	43902	MASKKSNHNPHSGDGASPGKIFIGGLAKDTTLDTFVKYFEKYGEIIDSVIMKDRQTGRPRGFGFITYADPSVVDQVMEETHVINDKQVEIKRTIPKGSGQGNDFKTKKIFVGGIPTTVTEDEFKSFFSQFGKVVEHEIIRDHVTKRSRGFGFVVFDNEKVVDNVLANGNRIDMAGTQVEIKKASPKKASNPAHVPAFGSDSRAHPYNDSFGGFGDSMSGFGPGGYGAGGYGPASYRSLGGFGSRFGDYGGYPDGNDFGGGFGGFGGGGAFSGYRGESSFGYSSRFGSYGGGIGGGYGGSGLGAYGREARGYGGYDGSGSADGYDSGPGASYGGTRSLYGSRAGYGGSSRYHPYGR	47|50	5.6|8.7	-|-	2|3	2|2	2|3	2|2	---	---	1	1	-	-	---	---	1	1	-	-	---	---	1	1	-	-	---	---	1	1	-	-	gi|462411761|gb|EMJ16810.1|	100	8e-108	gi|462411761|gb|EMJ16810.1|	hypothetical protein PRUPE_ppa007812mg [Prunus persica]	53.19	1e-07	sp|Q62176|RBM38_MOUSE	RNA-binding protein 38 OS=Mus musculus GN=Rbm38 PE=1 SV=2	83.09	1e-87	I1LXP8	I1LXP8_SOYBN Uncharacterized protein OS=Glycine max GN=Gma.51891 PE=4 SV=1	TP0356
121	gi|671737|emb|CAA52749.1|	Chloropyll a/b binding protein [Amaranthus hypochondriacus]	22758	DTAGLSADPETFAKNRELEVIHCRWAMLGALGCVFPELLARNGVKFGEAVWFKAGSQIFSEGGLDYLGNPSLIHAQSILAIWACQVILMGAVEGYRIAGGPLGEVVDPLYPGGSFDPLGLADDPDAFAELKVKEIKNGMLAMFSMFGFFVQAIVTGKGPLENLADHLADPVNNNAWAYATNFVPGK	-|41	-|11.8	-|-	-|6	-|1	-|2	-|1	-	---	-	-	-	-	-	---	-	-	-	-	-	---	-	-	-	-	-	---	-	-	-	-	gi|671737|emb|CAA52749.1|	100	2e-104	gi|671737|emb|CAA52749.1|	Chloropyll a/b binding protein [Amaranthus hypochondriacus]	97.31	4e-103	sp|P12333|CB2A_SPIOL	Chlorophyll a-b binding protein, chloroplastic OS=Spinacia oleracea PE=1 SV=1	100	2e-103	Q38714	Q38714_AMAHP Chloropyll a/b binding protein (Fragment) OS=Amaranthus hypochondriacus GN=Lhcb1*Ah1 PE=4 SV=1	-
122	gi|470106816|ref|XP_004289754.1|	PREDICTED: 3-isopropylmalate dehydrogenase 2, chloroplastic-like [Fragaria vesca subsp. vesca]	51354	MAALQLNAKPFTPPLVSSHPSSKHSFKLARVSCSAAVAAPSKRYTITLLPGDGIGPEVISVAKNVLNLAASIEGIEFKYQEMPVGGSALDLTGVPLPDETLSAALQSDAVLLGAIGGYKWDKNEKHLKPETGLLKLREGLKVFANLRPAVVLPQLVDASTLKREVAEGVDLMVVRELTGGIYFGQPRGFGTNENGEEIGFNTEVYAAYEVDRIARVAFETARKRQGKLCSVDKANVLEASMFWRKRIMEIASEYPDVELSHMYVDNAAMQLVRNPKQFDTIVTNNIFGDILSDEASMITGSIGMLPSASLGKSGPGLFEPIHGSAPDIAGQDKANPLATVLSVAMLLKYGLGEENAARRIEAAVLDTLDRGFRTVDIYSSGTKLVGCKEMGEEVLKSVD…	34|49	5.7|2.7	-|-	2|1	2|1	2|1	2|1	---	---	-	-	-	-	---	---	-	-	-	-	---	---	-	-	-	-	---	---	-	-	-	-	gi|470106816|ref|XP_004289754.1|	100	0	gi|470106816|ref|XP_004289754.1|	PREDICTED: 3-isopropylmalate dehydrogenase 2, chloroplastic-like [Fragaria vesca subsp. vesca]	80.05	0	sp|P93832|LEU32_ARATH	3-isopropylmalate dehydrogenase 2, chloroplastic OS=Arabidopsis thaliana GN=IMDH2 PE=1 SV=1	83.95	0	B9SWT3	B9SWT3_RICCO 3-isopropylmalate dehydrogenase OS=Ricinus communis GN=RCOM_0011000 PE=3 SV=1	slr1517
123	gi|11558252|emb|CAC17794.1|	microtubule-associated protein MAP65-1a [Nicotiana tabacum]	79498	MAEADAQAPVLDETTCGSLLQKLQQIWDEVGETDDERDNMLLQIDQECLDVYKRKVDQAVKSRAHLLQALADAKVELSRLLSALGEKTYVGIPEKTSGTIKEQLAAIAPALEKLWEQKDDRIKEFFDVQSQIQKISSEIAGTREQVESLTVDESDLSLKKLDEFQAQLQELQKEKSERLQKVLELVSTVHDLCAVLGMDFFSTVTEVHPSLNDSTGVQSKSISNDTLSSLAKTVLVLKEDKKQRLHKLQELATQLIDLWNLMDTPEEERSLFDHVTCNISASVDEVAIPGALALDLIEQAEVEVERLDQLKASKMKEIAFKRQAELEDIYARAHVEIDTEAAREKIMALIDSGNVDPAELLADMDNQIVNAKEEAHSRKEILDKVEKWMAACEEESWLE…	40|47	1.9|1.9	2|2	1|2	1|2	1|1	1|1	---	---	-	-	-	-	---	---	-	-	-	-	---	---	-	-	-	-	---	---	-	-	-	-	gi|11558252|emb|CAC17794.1|	100	0	gi|11558252|emb|CAC17794.1|	microtubule-associated protein MAP65-1a [Nicotiana tabacum]	73.98	0	sp|Q9FLP0|MA651_ARATH	65-kDa microtubule-associated protein 1 OS=Arabidopsis thaliana GN=MAP65-1 PE=1 SV=1	100	0	Q9FEV9	Q9FEV9_TOBAC Microtubule-associated protein MAP65-1a OS=Nicotiana tabacum GN=map65-1a PE=2 SV=1	-
124	gi|351723813|ref|NP_001237292.1|	uncharacterized protein LOC100500645 [Glycine max]	21808	MRDTNLELQESGWEELRKEARKIEGDLDVKLSSYAKLGARFTQGGSGYVDSGSPPIGSSRSWKSMEMEIQSLLEKLLDINDSMSRCAASAGPATSVTQKLARHRDILHEFTQEFRRIKGNINSMREHAELLSSVRDDITDFKEVCHQGCSYYVRELPSMEIYLI	22|48	6.1|6.1	-|-	1|3	1|3	1|1	1|1	---	---	-	-	-	-	---	---	-	-	-	-	---	---	-	-	-	-	---	---	-	-	-	-	gi|351723813|ref|NP_001237292.1|	100	6e-93	gi|351723813|ref|NP_001237292.1|	uncharacterized protein LOC100500645 [Glycine max]	78.48	1e-66	sp|O22151|GOS12_ARATH	Golgi SNAP receptor complex member 1-2 OS=Arabidopsis thaliana GN=GOS12 PE=1 SV=2	100	9e-78	I1JKS2	I1JKS2_SOYBN Uncharacterized protein OS=Glycine max GN=Gma.58000 PE=4 SV=1	-
125	gi|6625788|gb|AAF19398.1|AF203882_1	dynamin homolog [Astragalus sinicus]	121299	MAAIEELSELADSMRQASAVLADEDVDETTGSANSRRPSTFLNVVALGNVGAGKSAVLNSLIGHPVLPTGENGATRAPICIDLQRDTSLSSKSIILQIDNKSQQVSASALRHSLQDRLSKGSSGKGRDQIYLKLRTSTAPPLKLVDLPGLDQRIMDESIVSEYGEHNDAILLVIVPAAQASEIASSRALRMAKEYDGEGTRTIGVISKIDQAASDQKSLAAVQALLSNQGPARASDIPWVALIGQSVALATAQSGSAGSDNSLETAWRAESESLKSILTGAPPSKLGRIALVEALAQQIQNRMKLRLPNLLSGLQGKSQVVQDELARLGESMVTTSEGTRAIALELCREFEDKFLQHITSGEGTGWKIVACFEGRFPDRMKQLPLDRHFDINNVKRIVL…	-|34	-|2.9	-|15	-|2	-|2	-|2	-|2	-	---	-	-	-	-	-	---	-	-	-	-	-	---	-	-	-	-	-	---	-	-	-	-	gi|6625788|gb|AAF19398.1|AF203882_1	100	0	gi|6625788|gb|AAF19398.1|AF203882_1	dynamin homolog [Astragalus sinicus]	76.21	0	sp|Q9SE83|DRP2A_ARATH	Dynamin-2A OS=Arabidopsis thaliana GN=DRP2A PE=1 SV=2	100	0	Q9SDX4	Q9SDX4_ASTSI Dynamin homolog OS=Astragalus sinicus GN=DH1 PE=2 SV=1	YLL001w
126	gi|428180307|gb|EKX49175.1|	hypothetical protein GUITHDRAFT_105249 [Guillardia theta CCMP2712]	140127	MPQEEWRRISKSELDALERDARMAMRWAEEVKRLQREVQRLRSVGVLPSPIAFKGKRNDREDLKEGGGRAFQLKSIERRAYEEAIKELTKTNDFLLREVKVLQGKLSETPSQSNALSETGRSMMLSLRNLTSMRVQQSPTLMEGGDALRDAEEMKGRARKDWLASKRFGKQALSRAQGDAGVPAVGKKAASVQTEEHLMVDEELEGTLEAMFQRERALKQDLLDKNYELTLEIEKNKVVQEFCINLQDSIDDLEFKLSVLNADLLKRMEENKSLENELSALRDRQKAQVIMEKDIEEKESRIRELLRDVEHLEDENMELTYQSLEAIWKGSISSVNPVYFADPQPTKLERILAKAKGTKEPPGGGKQGSAGQEDVQAELMEAVLKGFQSVASFLSWAEK…	-|28	-|1.3	-|-	-|1	-|1	-|1	-|1	-	---	-	-	-	-	-	---	-	-	-	-	-	---	-	-	-	-	-	---	-	-	-	-	gi|428180307|gb|EKX49175.1|	100	0	gi|428180307|gb|EKX49175.1|	hypothetical protein GUITHDRAFT_105249 [Guillardia theta CCMP2712]	-	-	-	-	-	-	-	-	-
127	gi|460398472|ref|XP_004244783.1|	PREDICTED: uncharacterized protein LOC101260160 [Solanum lycopersicum]	44221	MSSSENPEIVERVFKDKDEEEKDEQKGSFIDKVKGFIQDIGEKIEETVGFGKPTADVSGIHIPHINLEKAEIVVDVLVKNPNPIPIPLIDINYLIESDGRELLSGLIPDAGTIHAHGSETVKIPLNLVYDDIRTTYHDIKPGSIIPYKIKVDLIVDVPVFGRITIPLEKNGEIPIPYKPDIDVEKIHFERFSFEETVAVLKLKLDNKNDFDLGLNSLDYDLWLSDVNVGGAELEKSATLAKNGITYIDLPITFRPKDFGSALWDMIRGRGTGYSMKGNINVDTPFGAMKLPISKEGGTTNLKKNKEDGGDDDEDED	-|183	-|14.6	-|-	-|7	-|3	-|3	-|2	-	1.072	-	2	-	-	-	---	-	1	-	-	-	0.881	-	2	-	-	-	---	-	1	-	-	gi|460398472|ref|XP_004244783.1|	100	8e-156	gi|460398472|ref|XP_004244783.1|	PREDICTED: uncharacterized protein LOC101260160 [Solanum lycopersicum]	31.61	6e-12	sp|P46518|LEA14_GOSHI	Late embryogenesis abundant protein Lea14-A OS=Gossypium hirsutum GN=LEA14-A PE=2 SV=1	87.38	3e-139	B6RCM0	B6RCM0_TOBAC Chilling-responsive protein OS=Nicotiana tabacum PE=2 SV=1	-
128	gi|224106349|ref|XP_002314138.1|	predicted protein [Populus trichocarpa] >gi|222850546|gb|EEE88093.1| predicted protein [Populus trichocarpa]	18426	MGSNLARLPPPESAIELFVTNNKGFDYGCSGFIFSWHMIFTIVFVHTYHRYGILLYTRTDSHFCWQYLAHNCSCIKQLAWYTVNLVAFFTDKKLPDLPERPAGLTSLPLLPQSRDKDSKNKEEHLPLLTGVSFENED	37|-	11.7|-	-|-	2|-	2|-	1|-	1|-	---	-	-	-	-	-	---	-	-	-	-	-	---	-	-	-	-	-	---	-	-	-	-	-	gi|224106349|ref|XP_002314138.1|	100	1e-77	gi|224106349|ref|XP_002314138.1|	predicted protein [Populus trichocarpa] >gi|222850546|gb|EEE88093.1| predicted protein [Populus trichocarpa]	43.17	1e-22	sp|Q56Y01|IPCS3_ARATH	Phosphatidylinositol:ceramide inositolphosphotransferase 3 OS=Arabidopsis thaliana GN=IPCS3 PE=2 SV=1	100	1e-76	B9HPA4	B9HPA4_POPTR Predicted protein OS=Populus trichocarpa GN=POPTRDRAFT_557998 PE=4 SV=1	-
129	gi|344323570|gb|AEN14510.1|	S-adenosylmethionine synthetase [Helianthus annuus]	51587	METFLFTSESVNEGHPDKLCDQVSDAILDACLEQDVDSKVACETCTKTNMVMVFGEITTKANVDYEKIVRDTCREIGFTSADVGLDADNCKVLVNIEQQSPDIAQGVHGHLTKKPEEIGAGDQGHMFGYATDETPELMPLTHVLATKLGAKLTEVRKNNTCAWLRPDGKTQVTVEYRNDNGAMVPIRVHTVLISTQHDETVTNDQIAADLKEHVIKPVIPAQYLDENTIFHLNPSGRFVIGGPHGDAGLTGRKIIIDTYGGWGAHGGGAFSGKDPTKVDRSGAYIVRQAAKSIVASGLARRCIVQVSYAIGVAEPLSVFVDTYKTGTIPDKDILVLIKENFDFRPGMMAINLDLKRGGNKRYQKTAAYGHFGRDDADFTWETVKELKPKA	-|81	-|10.0	-|2	-|4	-|1	-|3	-|1	-	---	-	-	-	-	-	---	-	-	-	-	-	---	-	-	-	-	-	---	-	-	-	-	gi|344323570|gb|AEN14510.1|	100	0	gi|344323570|gb|AEN14510.1|	S-adenosylmethionine synthetase [Helianthus annuus]	96.15	0	sp|Q38JH8|METK2_SOLTU	S-adenosylmethionine synthase 2 OS=Solanum tuberosum GN=METK2 PE=2 SV=1	100	0	G3LUV1	G3LUV1_HELAN S-adenosylmethionine synthase OS=Helianthus annuus GN=SAMS1 PE=2 SV=1	SPBC14F5.05c
130	gi|147828014|emb|CAN70794.1|	hypothetical protein VITISV_016372 [Vitis vinifera]	19760	MGGPWSRRGYDFXVFVDGSQLLVIQALQYKPESCDIQAHKGDKVKVHYRGKLTDGTVFDSSFERGDPIEFELGSGQVIKGWDQGLLGMCVGEKRKLKIPAKLGYGAQGSPPKIPGGATLIFDTELVAVNGKASSXAKADDSEL	516|457	19.6|19.6	3|3	17|14	17|14	2|2	2|2	0.57	0.724	16	13	*	*	0.793	0.616	10	13	-	-	0.917	0.92	16	13	-	-	0.412	0.367	10	12	*	*	gi|147828014|emb|CAN70794.1|	100	9e-77	gi|147828014|emb|CAN70794.1|	hypothetical protein VITISV_016372 [Vitis vinifera]	84.21	1e-52	sp|Q38935|FK151_ARATH	Peptidyl-prolyl cis-trans isomerase FKBP15-1 OS=Arabidopsis thaliana GN=FKBP15-1 PE=1 SV=2	100	1e-75	A5C0V5	A5C0V5_VITVI Peptidyl-prolyl cis-trans isomerase OS=Vitis vinifera GN=VITISV_016372 PE=4 SV=1	YDR519w
131	gi|8919178|emb|CAB96077.1|	alpha-glucosidase [Solanum tuberosum]	124717	MKFFFSSSFLLVFTICIIGCVNLVYTAPTKIGNGYSLIAIEESPDGGLIGYLKVKKKNNIYGPDIPNLQLYVKHETDNRLRIHITDADKQRWEVPYNLLPRESPPSLKQTIGKSRKGQFSLLSNQEYSGNELMFSYTSDPFSFSVKRKSNGQTLFNSSSEDSDPYSNLVFKDQYLEISTKLPKDASLYGLGENTQPHGIKIYPNDPYTLYTTDQSSINLNMDLYGSHPMYMDLRNVNGEAYAHAVLLMNSNGMDVFYRGDSLTYKVIGGVLDFYFFSGPTPLAVVDQYTDFIGRPAPMPYWSFGFHQCRWGYHNLSVIEDVIANYKKAKIPLDVIWNDDDHMDGKKDFTLHPINYPGPKLRAFLEKIHAEGMHYIVINDPGIGVNKSYGTYQRGLANDV…	260|276	9.2|9.2	-|-	15|14	1|1	7|7	1|1	---	---	-	-	-	-	---	---	-	-	-	-	---	---	-	-	-	-	---	---	-	-	-	-	gi|8919178|emb|CAB96077.1|	100	0	gi|8919178|emb|CAB96077.1|	alpha-glucosidase [Solanum tuberosum]	73.16	0	sp|Q9S7Y7|XYL1_ARATH	Alpha-xylosidase 1 OS=Arabidopsis thaliana GN=XYL1 PE=1 SV=1	100	0	Q9LEC9	Q9LEC9_SOLTU Alpha-glucosidase OS=Solanum tuberosum GN=mal2 PE=2 SV=1	SPAPB24D3.10c
132	gi|428178789|gb|EKX47663.1|	hypothetical protein GUITHDRAFT_159541 [Guillardia theta CCMP2712]	51873	MADDGAPGGDRGPGLDTTLTDADIESNWDHVCETFDDMGLDENLLRGIFAYGFEKPSAIQQRGTMPLIKGRDTIAQAQSGTGKTAAFSIGCLQRIDLNEKDCQALLLAPTRELAQQIQKVVLALGDYMGITCHACIGGTNVRDDIRKVEAGQQVVVGTPGRVHDMINRRALRTDGMKIFVLDEADEMLSRGFKDQIYDVFKFLPSKVQVGLFSATMPIEVLEITRHFMRDPVRILVKKDELTLEGIKQFYIAIDREDWKLDTLCDLYETLTITQAIIYVNTRRKVDWLLEKMTSRDFTVSALHGDMDQKGRELIMREFRSGSSRVLITTDLLARGIDVQQVSLVINYDLPSNRENYIHRIGRSGRFGRKGVAINFVTGDDVRNMRDIEQFYNTQIEEMP…	48|116	5.7|3.2	-|-	3|5	2|5	2|1	1|1	---	0	-	4	-	-	---	---	-	-	-	-	---	18692.6	-	3	-	-	---	---	-	-	-	-	gi|428178789|gb|EKX47663.1|	100	0	gi|428178789|gb|EKX47663.1|	hypothetical protein GUITHDRAFT_159541 [Guillardia theta CCMP2712]	77.32	3e-174	sp|A4QVP2|IF4A_MAGO7	ATP-dependent RNA helicase eIF4A OS=Magnaporthe oryzae (strain 70-15 / ATCC MYA-4617 / FGSC 8958) GN=TIF1 PE=3 SV=1	79.12	0	G4YJL5	G4YJL5_PHYSP Putative uncharacterized protein OS=Phytophthora sojae (strain P6497) GN=PHYSODRAFT_358814 PE=3 SV=1	SPAC1006.07
133	gi|293336273|ref|NP_001167833.1|	uncharacterized protein LOC100381533 [Zea mays]	141123	MSARIDLLMEEYVVQKGLKPDIESLSRELVMMNAALIDASRVPPDQLTEVEKLWARKVRDLSYDMEDAVDDFILRVAGGDDSAADSKFFKKTLAMVKDVMSMKKFKDRRQISDKVKDIKKLSNELAELRAKYTVRGVGADLAASTGIDPRVINLYKKETDLVGIKKSRNKVIRMLSMETKDDDALESHQALKIVSIVGVGGLGKTTLAKTVHDMLKKQFDCSAFISIGRTPNLNRTFEKMLLKLDREYKQVDMARWDLEQFKNELDEFLKDKRYLIVVDDIWDVDSWEAIRYALKDNNCGSRIIMTTRNFGIVTKLEEVYRLKPLSNANSKKLFYKRIESQEGESLDGELSSKIIHKCGGIPLAIIAIASLLVERSREEWSEVYDKIGLGNEDNTTKIM…	29|-	1.1|-	1|-	1|-	1|-	1|-	1|-	---	-	-	-	-	-	---	-	-	-	-	-	---	-	-	-	-	-	---	-	-	-	-	-	gi|293336273|ref|NP_001167833.1|	100	0	gi|413915920|gb|AFW55852.1|	hypothetical protein ZEAMMB73_085601 [Zea mays]	30.65	2e-21	sp|Q6L3Z4|R1B12_SOLDE	Putative late blight resistance protein homolog R1B-12 OS=Solanum demissum GN=R1B-12 PE=3 SV=2	100	0	C0HGT8	C0HGT8_MAIZE Putative uncharacterized protein OS=Zea mays PE=2 SV=1	RSp0842
134	gi|40644768|emb|CAE53892.1|	putative endo-1,3(4)-beta-glucanase [Triticum aestivum]	21885	LLRQVDLTGGYYDAGDNVKFGFPLAFSSTMLAWSVLEFGGMMKGELQHARDAVRWGADYLLKATAHPDTVYVQVGDAGKDHACWERPEDMDTPRTVYKVDPSTPGSDVAAETAAALAAASLVFRKSDPAYSSRLVARAKRVFEFADKHRGVYSAKLSSYVCPYYCSCSGY	-|16	-|9.4	-|-	-|1	-|1	-|1	-|1	-	---	-	-	-	-	-	---	-	-	-	-	-	---	-	-	-	-	-	---	-	-	-	-	gi|40644768|emb|CAE53892.1|	100	4e-79	gi|40644768|emb|CAE53892.1|	putative endo-1,3(4)-beta-glucanase [Triticum aestivum]	90.85	8e-73	sp|Q8LQ92|GUN3_ORYSJ	Endoglucanase 3 OS=Oryza sativa subsp. japonica GN=GLU8 PE=2 SV=1	100	4e-78	Q70JR3	Q70JR3_WHEAT Putative endo-1,3(4)-beta-glucanase (Fragment) OS=Triticum aestivum PE=2 SV=1	-
135	gi|460409893|ref|XP_004250371.1|	PREDICTED: eukaryotic translation initiation factor 3 subunit I-like [Solanum lycopersicum]	42996	MRPILMKGHERPLTFLKYNRDGDLLFSCAKDHTPTVWFADNGERLGTYRGHNGAVWCCDVSRDSSRLITGSADQTAMLWDVQTGAQLHTFTFDSPARSVDFSVGDKLAVITTDPFMGLTSAIHIKNISKDPSEQMSESVLVLKGPQGRINRAVWGPLNKTIISAGEDAVIRIWDAETGKVLKESDKEIGHKKGITSLQKSVDGSHFITGSLDKSAKLWDIRSLTLIKNYTTERPVNAVTMSPLLNHVVLGGGQDASAVTTTDHRAGKFEAKFYDKILTEEIGGVKGHFGPINALAFNPDGKSFASGGEDGYVRLHHFDQDYFNIRI	-|68	-|8.0	-|-	-|3	-|3	-|2	-|2	-	---	-	-	-	-	-	---	-	-	-	-	-	---	-	-	-	-	-	---	-	-	-	-	gi|460409893|ref|XP_004250371.1|	100	0	gi|460409893|ref|XP_004250371.1|	PREDICTED: eukaryotic translation initiation factor 3 subunit I-like [Solanum lycopersicum]	82.01	2e-156	sp|Q38884|EIF3I_ARATH	Eukaryotic translation initiation factor 3 subunit I OS=Arabidopsis thaliana GN=TIF3I1 PE=2 SV=2	88.34	3e-172	B9S7C0	B9S7C0_RICCO Eukaryotic translation initiation factor 3 subunit, putative OS=Ricinus communis GN=RCOM_0776150 PE=4 SV=1	MA2525
136	gi|6919958|sp|O80361.1|RK4_TOBAC	RecName: Full=50S ribosomal protein L4, chloroplastic; AltName: Full=CL4; AltName: Full=R-protein L4; Flags: Precursor >gi|3298439|dbj|BAA31510.1| chloroplast ribosomal protein L4 [Nicotiana tabacum]	37926	MAASLSFFSSSIFLSNPNIQSSKHLLFRSPKQLSVAAIATIRSEVATIPILSFDGAEVGSTTLNLKSAPLDTARAVVHRGLTTDLRNQRRGTASTLTRSEVRGGGIKPYPQKKTGRARRGSNRTPLRPGGGVVFGPKPKDWSVKINKKEKRLAISTALSSASENTIVVEEFNDKFEKPKTKEFIDLMRRWGLDPKEKSLFLMTDVSDNVILSSRNIGTLKMLTPRTLNLFDILDSEKLVLTKSAVDFLNERYGDENEWEDEEEDDQEDNDGGEAEESTESSE	42|-	4.3|-	2|-	1|-	1|-	1|-	1|-	---	-	-	-	-	-	---	-	-	-	-	-	---	-	-	-	-	-	---	-	-	-	-	-	gi|6919958|sp|O80361.1|RK4_TOBAC	100	1e-124	gi|6919958|sp|O80361.1|RK4_TOBAC	RecName: Full=50S ribosomal protein L4, chloroplastic; AltName: Full=CL4; AltName: Full=R-protein L4; Flags: Precursor >gi|3298439|dbj|BAA31510.1| chloroplast ribosomal protein L4 [Nicotiana tabacum]	100	4e-125	sp|O80361|RK4_TOBAC	50S ribosomal protein L4, chloroplastic OS=Nicotiana tabacum GN=RPL4 PE=2 SV=1	75.59	1e-82	B9SHY1	B9SHY1_RICCO 50S ribosomal protein L4, putative OS=Ricinus communis GN=RCOM_0611440 PE=3 SV=1	sll1800
137	gi|470122073|ref|XP_004297074.1|	PREDICTED: 50S ribosomal protein L3-2, chloroplastic-like [Fragaria vesca subsp. vesca]	42936	MSALSRGLISRLRLLSLNPATSSSSSTTLPATTSYSHFFRCFASEALADGAEIAEDRGRIIEAKPGVMTPQSKRTGVIAVKCGMSARWDKWGARVPITVLWVDDNIVSQVKTPEKEGITALQIGCGQKKAKHLTKPEVGHFRAQGVPLKRKLREFPVTEDALLPVGMSIGVRHFVPGQYVDVTGITRGHGFQGVMKRYGHRGGPASHGASKSHRSIGSTGQRDDAGRVFKAKKMPGRMGGKQRTVKNVWIYKIDPARNLIWVRGQVPGAEGNFVFIKDAFYKKPDVSILPFPTYFAPEDEDPSKLEPLVADLGEVDPFMVAD	-|37	-|5.9	-|-	-|2	-|2	-|1	-|1	-	---	-	-	-	-	-	---	-	-	-	-	-	---	-	-	-	-	-	---	-	-	-	-	gi|470122073|ref|XP_004297074.1|	100	2e-169	gi|470122073|ref|XP_004297074.1|	PREDICTED: 50S ribosomal protein L3-2, chloroplastic-like [Fragaria vesca subsp. vesca]	78.08	1e-127	sp|Q9LRN8|RK3B_ARATH	50S ribosomal protein L3-2, chloroplastic OS=Arabidopsis thaliana GN=RPL3B PE=2 SV=1	82.23	9e-134	D7T692	D7T692_VITVI Putative uncharacterized protein OS=Vitis vinifera GN=VIT_05s0020g00810 PE=3 SV=1	CC1248
138	gi|2982289|gb|AAC32130.1|	60S ribosomal protein L17 [Picea mariana]	18967	GSAGNKFRMSLGLPVAATVNCADNTGAKNLYIISVKGIKGRLNRLPAACVGDMVMATVKKGKPDLRKKVMPAVIVRQRKPWRRKDGVYMYFEDNAGVIVNPKGEMKGSAITGPIGKECADLWPRIASAANAIV	53|-	6.0|-	35|-	2|-	2|-	1|-	1|-	1.545	-	2	-	-	-	1.285	-	2	-	-	-	0.632	-	2	-	-	-	1.129	-	2	-	*	-	gi|2982289|gb|AAC32130.1|	100	2e-40	gi|413939451|gb|AFW74002.1|	hypothetical protein ZEAMMB73_103592 [Zea mays]	96.24	4e-70	sp|Q07760|RL23_TOBAC	60S ribosomal protein L23 OS=Nicotiana tabacum GN=RPL23 PE=2 SV=1	100	3e-70	A9NS49	A9NS49_PICSI Putative uncharacterized protein OS=Picea sitchensis PE=2 SV=1	SPCC1322.11
139	gi|9294522|dbj|BAB02784.1|	alpha glucosidase-like protein [Arabidopsis thaliana]	121875	MTSTDMIFEPILEHGVFRFDCSVDHRKAAFPSVSFKNSKDREVPIVSHIVPAYIPTCGCLQDQQVVTFEFSPGTSFYGTGEVSGQLERTGKRVFTWNTDAWGYGSGTTSLYQSHPWVLVVLPTGETLGVLADTTRKCEIDLRKEGIIRIISPASYPIITFGPFSSPTAVLESLSHAIGTVFMPPKWALGYHQCRWSYMSDKRVAEIAQTFRDKKIPSDVIWMDIDYMDGFRCFTFDKERFPDPSALAKDLHSNGFKAIWMLDPGIKQEEGYYVYDSGSKNDVWISRADGKPFTGEVWPGPCVFPDYTNSKARSWWANLVKEFVSNGVDGIWNDMNEPAVFKVVTKTMPENNIHHGDDELGGVQNHSHYHNVYGMLMARSTYEGMELADKNKRPFVLTRA…	-|31	-|1.0	-|22	-|2	-|2	-|1	-|1	-	---	-	-	-	-	-	---	-	-	-	-	-	---	-	-	-	-	-	---	-	-	-	-	gi|9294522|dbj|BAB02784.1|	100	0	gi|9294522|dbj|BAB02784.1|	alpha glucosidase-like protein [Arabidopsis thaliana]	41.14	4e-27	sp|Q09901|YAJ1_SCHPO	Uncharacterized family 31 glucosidase C30D11.01c OS=Schizosaccharomyces pombe (strain 972 / ATCC 24843) GN=SPAC30D11.01c PE=3 SV=2	100	0	Q9LUG2	Q9LUG2_ARATH Alpha glucosidase-like protein OS=Arabidopsis thaliana PE=4 SV=1	alr4773
140	gi|224068117|ref|XP_002302667.1|	predicted protein [Populus trichocarpa] >gi|222844393|gb|EEE81940.1| predicted protein [Populus trichocarpa]	51555	MAEGTEIEERVDLEEDNYMEEIDDDVQDQLDEDGEDDAGDAHAEENVEEEYEDSKPEGKEKDKHAQLLSLPPHGSEVFIGGLPKDVIEDELRDLCETIGEIFEIRLMKDKDTGESKGFAFVAFKSKEVARKATEELRSKDYKGKTLRCSISETKNRLFIGNVPKNLTEDEFRKIIEEVGPGMEVLELIKDPQTPTRNRGFAFILYYNNACADYSRQKMLNANFKLDGHTPTVSWADPKGMPPDHSPAAAGQAVRDTEKYEIDGQLLEVVLAKPQADKKPDGSYPYNAGVNPNPVPLPAYSGFAGNPHGSLGTGFGVAAGFQQPVIYGRGPMPAGMHMVPMVLPDGRIGYVLQQPGVQMPQPQPRRVDRSNSPSGPGRAGSSGDDGNRGRRYRPY	34|35	2.0|2.0	11|2	1|1	1|1	1|1	1|1	---	---	-	-	-	-	---	---	-	-	-	-	---	---	-	-	-	-	---	---	-	-	-	-	gi|224068117|ref|XP_002302667.1|	100	0	gi|224068117|ref|XP_002302667.1|	predicted protein [Populus trichocarpa] >gi|222844393|gb|EEE81940.1| predicted protein [Populus trichocarpa]	42.25	2e-09	sp|Q86U06|RBM23_HUMAN	Probable RNA-binding protein 23 OS=Homo sapiens GN=RBM23 PE=1 SV=1	100	0	B9GRQ0	B9GRQ0_POPTR Predicted protein OS=Populus trichocarpa GN=POPTRDRAFT_799137 PE=4 SV=1	VC0159
141	gi|147789082|emb|CAN75787.1|	hypothetical protein VITISV_041015 [Vitis vinifera]	140339	MEGRTELDEIEKLLGEIPNATSGHQHFEEFGQCNSDLKRQSLGGSFPIEPSIPVCVNFPKRSLNEKFQNYGSLDEGKLSVNKSIESEEPSLPDDQLWISAFAELSFKDGVRMEAVCSPLVNYKALPNQTILFQGQCPNSLKRTSSNLDPQVMVVPSSQSPNPPSSXFNNFDVKNNSQESSNLLKLNVPELKKQQFGNYPPIEXFSNTEPLPHGVRGFPFFPNVPVPGAGFPAYLHPQQLGQHKFDWMHVEKEHYHKLHQQYRYQVQNMGRGAQHPIQANGNVATRLVSQEMRQPYFETPHQFEKSHQESFWNKYRIVKGLNESNPGLSSTDFNAIHVLDKVGKMTIPEKILTRSNGLNSLRTIKFGSIRENEAGTHVNQNGRVIPNGHFRQRLSSPTAG…	46|-	0.9|-	5|-	1|-	1|-	1|-	1|-	---	-	1	-	-	-	---	-	1	-	-	-	---	-	1	-	-	-	---	-	1	-	-	-	gi|147789082|emb|CAN75787.1|	100	0	gi|147789082|emb|CAN75787.1|	hypothetical protein VITISV_041015 [Vitis vinifera]	58.44	2e-128	sp|Q9LVC3|PUM12_ARATH	Pumilio homolog 12 OS=Arabidopsis thaliana GN=APUM12 PE=2 SV=2	100	0	A5AKU0	A5AKU0_VITVI Putative uncharacterized protein OS=Vitis vinifera GN=VITISV_041015 PE=4 SV=1	YGL014w
142	gi|57338666|gb|AAW49412.1|	ribulose-1,5-bisphosphate carboxylase/oxygenase large subunit [Oxandra asbeckii]	59724	XASVGFKAGVKEYKLTXYXPXYXTKDTDILAAFRVTPQPGVPPEEAGAAVAAESSTGTWTTVWTDGLTSLDRYKGRCYHIEPVAGEENQYIAYVAYPLDLFEEGSVTNMFTSIVGNVFGFKALRALRLEDLRIPTSYIKTFQGPPHGIQVERDKLNKYGRPLLGCTIKPKLGLSAKNYGRAVYECLRGGLDFTKDDENVNSQPFMRWRDRFLFCXEALXKAQAETGEIKGHYLNATAGTCDEMXKRAACARELGVPIVMHDYLTGGFTANTTLAHYCREHGLLLHIHRAMHAVIDRQKNHGMHFRVLAKALRMSGGDHIHAGTVVGKLEGERDITLGFVDLLRDDFIEKDRSRGIYFTQDWVSLPGVLPVASGGIHVWHMPALTEIFGDDSVLQFGGGT…	954|-	24.5|-	-|-	87|-	2|-	8|-	1|-	---	-	1	-	-	-	---	-	1	-	-	-	---	-	1	-	-	-	---	-	1	-	-	-	gi|57338666|gb|AAW49412.1|	100	0	gi|57338666|gb|AAW49412.1|	ribulose-1,5-bisphosphate carboxylase/oxygenase large subunit [Oxandra asbeckii]	95.91	0	sp|O20304|RBL_CASFS	Ribulose bisphosphate carboxylase large chain (Fragment) OS=Cassia fistula GN=rbcL PE=3 SV=1	100	0	Q5I979	Q5I979_9MAGN Ribulose-1,5-bisphosphate carboxylase/oxygenase large subunit (Fragment) OS=Oxandra asbeckii GN=rbcL PE=3 SV=1	alr1524
143	gi|47716659|gb|AAT37529.1|	purple acid phosphatase 1 [Solanum tuberosum]	42733	MASMKILNIFISFLLLLLFPAAMAELHRLEHPVNTDGSISFLVVGDWGRRGTFNQSQVAQQMGIIGEKLNIDFVVSTGDNFYDDGLTGVDDPAFEESFTNVYTAPSLQKNWYNVLGNHDYRGDALAQLSPILKQKDNRWICMRSYIVNTDVAEFFFVDTTPFQDMYFTTPKDHTYDWRNVMPRKDYLSQVLKDLDSALRESSAKWKIVVGHHTIKSAGHHGSSEELGVHILPILQANNVDFYLNGHDHCLEHISSSDSPLQFLTSGGGSKSWRGDMNWWNPKEMKFYYDGQGFMAMQITQTQVWIQFFDIFGNILHKWSASKNLVSIM	45|36	3.7|3.7	1|1	1|1	1|1	1|1	1|1	---	---	1	-	-	-	---	---	1	-	-	-	---	---	1	-	-	-	---	---	1	-	-	-	gi|47716659|gb|AAT37529.1|	100	0	gi|47716659|gb|AAT37529.1|	purple acid phosphatase 1 [Solanum tuberosum]	66.23	6e-127	sp|Q8H129|PPA3_ARATH	Purple acid phosphatase 3 OS=Arabidopsis thaliana GN=PAP3 PE=2 SV=1	100	0	Q6J5M7	Q6J5M7_SOLTU Purple acid phosphatase 1 OS=Solanum tuberosum GN=PAP1 PE=2 SV=1	all1686
144	gi|307103941|gb|EFN52198.1|	hypothetical protein CHLNCDRAFT_8146 [Chlorella variabilis]	35207	PTNTIIRIVPQQTAYVVERFGKYSRTLTPGLHILIPIVDRIAYAHSLKETTIPVPNQTAITKDNVSLTIDGVLYVKVMDAYRASYGVENALYAVTQLAQTTMRSELGKISLDSVFSERDTLNANIVASIQSAAQVWGLQVLRYEIRDIMPPAAVRNAMELQAEAERRKRAQILESEGQRQSKINVAEAGKSEVILASEAARQDAINRAEGEASAIFARAEATARGLQLLADAIRQRGGSEAVSLRVAEQYLDSFGEIAKQGTTMLLPAATHDPASMVASALSIYKQVAAAGAGPD	-|28	-|5.1	-|-	-|1	-|1	-|1	-|1	-	---	-	-	-	-	-	---	-	-	-	-	-	---	-	-	-	-	-	---	-	-	-	-	gi|307103941|gb|EFN52198.1|	100	2e-168	gi|307103941|gb|EFN52198.1|	hypothetical protein CHLNCDRAFT_8146 [Chlorella variabilis]	58.8	6e-89	sp|Q99JB2|STML2_MOUSE	Stomatin-like protein 2 OS=Mus musculus GN=Stoml2 PE=1 SV=1	100	2e-167	E1ZPS4	E1ZPS4_CHLVA Putative uncharacterized protein (Fragment) OS=Chlorella variabilis GN=CHLNCDRAFT_8146 PE=4 SV=1	RC0452
145	gi|134684|sp|P10792.1|SODCP_PETHY	RecName: Full=Superoxide dismutase [Cu-Zn], chloroplastic; Flags: Precursor >gi|226761|prf||1604468A superoxide dismutase	25458	MAAHTIFTTTSTTNSFLFPIASSNTNSAPSLSSSFHGVSLKVKSKTPQSLTLSSVTSPKPFIVFAATKKAVAVLKGTSNVEGVVTLTQDDDGPTTVKVRITGLAPGLHGFHLHEFGDTTNGCMSTGPHFNPNGLTHGAPGDEVRHAGDLGNIEANASGVAEATLVDNQIPLSGPNSVVGRALVVHELEDDLGKGGHELSLTTGNAGGRLACGVVGLTPI	542|-	16.0|-	-|-	18|-	1|-	2|-	1|-	---	-	-	-	-	-	---	-	-	-	-	-	---	-	-	-	-	-	---	-	-	-	-	-	gi|134684|sp|P10792.1|SODCP_PETHY	100	1e-103	gi|134684|sp|P10792.1|SODCP_PETHY	RecName: Full=Superoxide dismutase [Cu-Zn], chloroplastic; Flags: Precursor >gi|226761|prf||1604468A superoxide dismutase	100	4e-104	sp|P10792|SODCP_PETHY	Superoxide dismutase [Cu-Zn], chloroplastic OS=Petunia hybrida GN=SODCP PE=2 SV=1	92.86	3e-76	G0WP59	G0WP59_9SOLA Superoxide dismutase [Cu-Zn] (Fragment) OS=Withania somnifera PE=2 SV=1	YJR104c
146	gi|3046731|emb|CAA06503.1|	protein kinase [Craterostigma plantagineum]	47862	MEKYELVKDIGSGNFGVARLMRNKETKELVAMKYIERGHKIDENVAREIINHRSLRHPNIIRFKEVVLTPTHLAIVMEYAAGGELFERICNAGRFSEDEARYFFQQLICGVHYCHALQICHRDLKLENTLLDGSPAPRLKSCDFGYSKSSLLHSRPKSTVGTPAYIAPEVLSRREYDGKLADVWSCGVTLYVMLVGAYPFEDQEDPFFFRKTILWIMAVQYKIPDYVRISQSCRHLLSRIFVANPLRRITIKEIKSHLWFLKNLPRELTEVAQAAYFRRDNPTYSLQSEEEIMKIVEEAKVPPQASRSIGGFGWGTEEDEENVEEEEEGESEGEEDEYEKQVKAAHASGEVPPLT	33|47	3.1|3.1	144|144	1|1	1|1	1|1	1|1	---	---	-	1	-	-	---	---	-	-	-	-	---	---	-	1	-	-	---	---	-	-	-	-	gi|3046731|emb|CAA06503.1|	100	0	gi|3046731|emb|CAA06503.1|	protein kinase [Craterostigma plantagineum]	87.38	1e-160	sp|P43291|SRK2A_ARATH	Serine/threonine-protein kinase SRK2A OS=Arabidopsis thaliana GN=SRK2A PE=1 SV=1	100	0	O65765	O65765_CRAPL Protein kinase OS=Craterostigma plantagineum GN=cppk1 PE=2 SV=1	ECU03g0620
147	gi|61677145|gb|AAX51973.1|	transposase [Pisum sativum]	59667	MYIYHELLQKSVDGKLRKGATNEVASSNSVPLRTVQRIWKRAKESETRDVSHRKTKNCGRKRISIDENQIREFPFSQRTNIRSLAFALKTNPTSVFRLIKSGAIRRNSNAIKPLLKEENKISRLEFCLSMLEGTPHDPMFKSMHNIIHIDEKWFYMTKKSEKYYLLPDEDEPYRTCKSKNFIAKVMFLVAQTRPRFDSEENETFSGKIGVFPFVTHEPAIRSSINRVAGTMVTKAITTVNRDVVRSFLIDKVLPAIREKWPRDEFESTIFIQQDNARTHINHDDPLFREAATKDGFDIRLMCQPANSPDLNILDLGFFSAIQSLQYKEAPKTIDELISAVVKSFENFPSIKSNRIFVSLQLCMIEIMKEKGSNKYKIPHVNKERLERVGQLPIQIKCDP…	-|24	-|1.9	-|1	-|1	-|1	-|1	-|1	-	---	-	-	-	-	-	---	-	-	-	-	-	---	-	-	-	-	-	---	-	-	-	-	gi|61677145|gb|AAX51973.1|	100	0	gi|61677145|gb|AAX51973.1|	transposase [Pisum sativum]	-	-	-	-	100	0	Q49KC9	Q49KC9_PEA Transposase OS=Pisum sativum PE=4 SV=1	-
148	gi|20140867|sp|Q9MT28.1|THRC_SOLTU	RecName: Full=Threonine synthase, chloroplastic; Short=TS; Flags: Precursor >gi|8439547|gb|AAF74984.1|AF082894_1 threonine synthase [Solanum tuberosum]	67129	MAASCMLRSSFISPGLPQLHHQSTSKPNNGIHFFTPIKATATNDAISQQKHRRPADENIREEARRHCSSHNFSARYVPFNAGPNSDEWYSLDEIVYRSRSGGLLDVQHDMDALKKFDGQYWRSLFDSRVGKTTWPYGSGVWSKKEWVLPEIDSDDIVSAFEGNSNLFWAERFGKQFLGMTDLWVKHCGISHTGSFKDLGMTVLVSQVNRLRKMHKPVVGVGCASTGDTSAALSAYCASAGIPSIVFLPANKISMAQLVQPIANGAFVLSIDTDFDGCMQLIREVTAELPIYLANSLNSLRLEGQKTAAIEILQQFDWEVPEWVIVPGGNLGNIYAFYKGFQMCKELGLVDRIPRLVCAQAANANPLYLHYKSGWKDFKPVKANTTFASAIQIGDPVSID…	32|-	2.1|-	12|-	2|-	2|-	1|-	1|-	---	-	-	-	-	-	---	-	-	-	-	-	---	-	-	-	-	-	---	-	-	-	-	-	gi|20140867|sp|Q9MT28.1|THRC_SOLTU	100	0	gi|20140867|sp|Q9MT28.1|THRC_SOLTU	RecName: Full=Threonine synthase, chloroplastic; Short=TS; Flags: Precursor >gi|8439547|gb|AAF74984.1|AF082894_1 threonine synthase [Solanum tuberosum]	100	0	sp|Q9MT28|THRC_SOLTU	Threonine synthase, chloroplastic OS=Solanum tuberosum PE=2 SV=1	92.79	5e-169	Q6Q470	Q6Q470_MEDSA Chloroplast threonine synthase (Fragment) OS=Medicago sativa GN=TS PE=2 SV=1	MJ1465
149	gi|255580768|ref|XP_002531205.1|	conserved hypothetical protein [Ricinus communis] >gi|223529207|gb|EEF31182.1| conserved hypothetical protein [Ricinus communis]	116313	MDTCNNDVGKETGNVNSPQIEKEVNSISKRGLENGETGELGFRTVKKARSATGEMQRVAEIVLVLSAMAGMRGGKNPTETEVKLMEEARAKLVEICQDWKPNDLVARDAIGSVIEDLGLNSKLKDQRLGQFRGPNTRLSIKEKISFAKKKMEDSKKFPAPSATYTSQISQPSFGAMGEVCGPSHSIRVFSSDKPTNPLLPSGSHPTSSALGHVLAVTSTSITHHSATSEVRASTVSTGIPNSHPGRDLSVLAGPKVEKTNFKPEGGSNGTSYAPQVQANVSANQPLMNAPTWSLQSHSVPSNKATPENKALNHNFAKAEGATTLAMSQAAPQAGRDQAFRPLITQSPSANLQSINQPMQGVKYVQPPSFFNNHNEIAKIVQKLLQPKLPEHPTWTPPSR…	-|14	-|1.1	-|-	-|1	-|1	-|1	-|1	-	---	-	-	-	-	-	---	-	-	-	-	-	---	-	-	-	-	-	---	-	-	-	-	gi|255580768|ref|XP_002531205.1|	100	0	gi|255580768|ref|XP_002531205.1|	conserved hypothetical protein [Ricinus communis] >gi|223529207|gb|EEF31182.1| conserved hypothetical protein [Ricinus communis]	43.08	4e-40	sp|Q5PNS0|Y3228_ARATH	PHD finger protein At3g20280 OS=Arabidopsis thaliana GN=At3g20280 PE=2 SV=1	100	0	B9SYY6	B9SYY6_RICCO Putative uncharacterized protein OS=Ricinus communis GN=RCOM_0546900 PE=4 SV=1	-
150	gi|224081194|ref|XP_002306329.1|	predicted protein [Populus trichocarpa] >gi|222855778|gb|EEE93325.1| predicted protein [Populus trichocarpa]	91551	MSSQYSVLGNKLDLVQWKVTELKEELRRRKLKTSGLKDDLIKRLEEAIRIEREDEEIRHELVNAAEVAEDVDNGVDLENPHVVGVKNSEAVSAVTETVEVVVDDAANRNEKVDDVMVQVGIDESVKAMGPRELQEEVKMGGVNSSRVEEEELTVHATTVETSISVTESVVSEVALSVQDVQNSGTQEANENSSIQLENEDSKPQLENESSKPPDENVVLESSAPDNQVSEVNPNLGFQVKSDSISTDSVSINEKIELKDNIIADDVKLELDDVKLEMVEPSSSNVVPVGGESHPMDVEEPQEKSPSVEKKDDSNGTNADMSKKNYSVDVGCSEKLNLDRSSGDDSMEEDVLESKQIDSKYNTDEVGDKCKIKNELPSLKEENLVNVTGKDLSTDQKEIH…	63|58	1.9|1.9	3|3	3|1	3|1	1|1	1|1	0.743	---	2	1	-	-	---	---	1	1	-	-	1.999	---	2	1	-	-	---	---	1	1	-	-	gi|224081194|ref|XP_002306329.1|	100	0	gi|224081194|ref|XP_002306329.1|	predicted protein [Populus trichocarpa] >gi|222855778|gb|EEE93325.1| predicted protein [Populus trichocarpa]	42.68	5e-17	sp|Q9UKV3|ACINU_HUMAN	Apoptotic chromatin condensation inducer in the nucleus OS=Homo sapiens GN=ACIN1 PE=1 SV=2	100	0	B9H574	B9H574_POPTR Predicted protein OS=Populus trichocarpa GN=POPTRDRAFT_558581 PE=4 SV=1	-
151	gi|13676390|dbj|BAB41184.1|	uroporphyrinogen decarboxylase [Amaranthus tricolor]	24926	GMNIPFDIVKGKGPIIFDPLRTQEDVDRVREFVPEESVPYVGNALTILRKEVDNKAAVLGFVGAPFTLASYVVEGGSSKHFSKIKRLAFSDPKVLHALLQKFATSMANYVKYQADHGAQAVQIFDSWATELSPVDFEEFSLPYLKQIVDSVKSTHPNLPIILYASGSGGLLERLPLTGVDVVSLDWTVDMA	53|30	4.7|4.7	-|-	4|3	4|3	1|1	1|1	---	---	1	-	-	-	---	---	1	-	-	-	---	---	1	-	-	-	---	---	1	-	-	-	gi|13676390|dbj|BAB41184.1|	100	1e-107	gi|13676390|dbj|BAB41184.1|	uroporphyrinogen decarboxylase [Amaranthus tricolor]	89.01	6e-98	sp|Q42967|DCUP_TOBAC	Uroporphyrinogen decarboxylase, chloroplastic OS=Nicotiana tabacum GN=DCUP PE=1 SV=1	100	1e-106	Q9AVF8	Q9AVF8_AMATR Uroporphyrinogen decarboxylase (Fragment) OS=Amaranthus tricolor GN=UROD PE=2 SV=1	slr0536
152	gi|3135693|gb|AAC16555.1|	glutathione S-transferase [Gossypium hirsutum]	21532	RIIVQYIDEVWPSAPILPSDPHERATARFWAAYLDDKWFPSLRAIGMAEGEDARKAAIGQVEEGLMLLEEAFGKCSQGQAFFGKDQIGYLDITFGCSLGWLRVTEKMSGIKLLNEINTPALLKWANRFCNDAAVKDVMPETEKLAEFAKMLRGRVRATPTS	-|22	-|11.8	-|1	-|1	-|1	-|1	-|1	-	---	-	-	-	-	-	---	-	-	-	-	-	---	-	-	-	-	-	---	-	-	-	-	gi|3135693|gb|AAC16555.1|	100	7e-91	gi|3135693|gb|AAC16555.1|	glutathione S-transferase [Gossypium hirsutum]	58.49	8e-48	sp|Q9FUS8|GSTUH_ARATH	Glutathione S-transferase U17 OS=Arabidopsis thaliana GN=GSTU17 PE=2 SV=1	100	7e-90	O65344	O65344_GOSHI Glutathione S-transferase (Fragment) OS=Gossypium hirsutum GN=GST PE=2 SV=1	-
153	gi|224097238|ref|XP_002310888.1|	predicted protein [Populus trichocarpa] >gi|222853791|gb|EEE91338.1| predicted protein [Populus trichocarpa]	50691	MAWLARSIANSLNFDDEEEDFSNTESDEQQRQSTTPRGLKEDLTDLKQTLSRQFWGVASFLAPTPSENDPHPDDEDAALIAGIRSDFSEIGGKFKSGISKLSTNKTVSEFTKIASDLLQLGSESDDDEIATIVATAVGVTEEVVGFARDVAMHPETWLDFPIPRVQDFEDFDMSDAQQEHALAVERLAPRLAALRIELCPGYMSEGCFWKIYFVLLHPRLTKHDAQLLSTPQIVEARAMLSHELQNKDKAKSTPDWPGTLSVPSHAETESVTIMTSGTKAAPPTLAAKTPDHETVPSSVSAEPEMEKHPVESTQMQIIDKYIVEEEKVNQAKHQHSSSSSSRILDEKFEDDGDDWLKDDSSEMIGASGASMPLGNDEDVSFSDLEEDDEDEPTSYTK	-|21	-|3.8	-|-	-|2	-|2	-|1	-|1	-	---	-	-	-	-	-	---	-	-	-	-	-	---	-	-	-	-	-	---	-	-	-	-	gi|224097238|ref|XP_002310888.1|	100	0	gi|224097238|ref|XP_002310888.1|	predicted protein [Populus trichocarpa] >gi|222853791|gb|EEE91338.1| predicted protein [Populus trichocarpa]	-	-	-	-	100	0	B9HFZ2	B9HFZ2_POPTR Predicted protein (Fragment) OS=Populus trichocarpa GN=POPTRDRAFT_215790 PE=4 SV=1	-
154	gi|2570513|gb|AAB82142.1|	chlorophyll a-b binding protein [Oryza sativa Indica Group]	32050	MAASALHQTTSFLGTAPRRDELVRRVGNSGGRITMRRTVKSAPQNIWYGPDRPKYLGPFSEQTPSYLTGKFPGDYGWDTAGLSADPETFARNRELEVIHSRWAMLGALGCFFPEILSKNGVNFGEAVWFKAGAQIFSEGGLDYLGNPALVRPQSILAIWAVQVVLMGFVEGYRVGGGPLGEGLDKVYPGGAFDHLGLAEDPDTFAEFKVKEFNNGRLAMFSMLGFFVQAIVTGKGPIENFFDHVADPVANNAWAYATNFVPGK	295|-	9.9|-	-|-	11|-	1|-	2|-	1|-	---	-	-	-	-	-	---	-	-	-	-	-	---	-	-	-	-	-	---	-	-	-	-	-	gi|2570513|gb|AAB82142.1|	100	3e-152	gi|2570513|gb|AAB82142.1|	chlorophyll a-b binding protein [Oryza sativa Indica Group]	94.3	2e-143	sp|A2XJ35|CB23_ORYSI	Chlorophyll a-b binding protein, chloroplastic OS=Oryza sativa subsp. indica GN=OsI_012078 PE=2 SV=1	94.3	7e-142	I1PD66	I1PD66_ORYGL Uncharacterized protein OS=Oryza glaberrima PE=4 SV=1	-
155	gi|384245412|gb|EIE18906.1|	heat shock protein 70 [Coccomyxa subellipsoidea C-169]	88194	MAKQAPAIGIDLGTTYSCVGVWMNDRVEIIANDMGNRTTPSYVAFTDTERLIGDAAKNQVAMNPINTVFDAKRLIGRKFHDASIQADIKHWPFTVKPGPGDKPMIEVDYKGEKREFSAEEVSSMVLVKMKETAQAFLGADKEVKRAVVTVPAYFNDSQRQATKDAGVIAGLDVMRIINEPTAAAIAYGLDKKSTSVGESNVLIFDLGGGTFDVSLLTIEEGIFEVKATAGDTHLGGEDFDNRLVNFFVQEFKRKHKKDISGNPRALRRLRTSCERAKRTLSSSAQTSIEIDSLFEGVDFYSSITRARFEELNMDLFRKCMEPVEKTLRDAKMDKSSVNEIVLVGGSTRIPKVQQMLQDFFNGKELCKAINPDEAVAYGAAVQAAILSGEGSEKVQDLLL…	352|412	12.2|12.2	-|-	22|21	2|3	7|7	2|2	---	---	-	-	-	-	---	---	-	-	-	-	---	---	-	-	-	-	---	---	-	-	-	-	gi|384245412|gb|EIE18906.1|	100	0	gi|384245412|gb|EIE18906.1|	heat shock protein 70 [Coccomyxa subellipsoidea C-169]	86.16	0	sp|P27322|HSP72_SOLLC	Heat shock cognate 70 kDa protein 2 OS=Solanum lycopersicum GN=HSC-2 PE=2 SV=1	100	0	I0YKI7	I0YKI7_9CHLO Heat shock protein 70 OS=Coccomyxa subellipsoidea C-169 GN=COCSUDRAFT_26106 PE=4 SV=1	SPAC13G7.02c
156	gi|5734779|gb|AAD50044.1|AC007980_9	cytosolic tRNA-Ala synthetase [Arabidopsis thaliana] >gi|31711780|gb|AAP68246.1| At1g50200 [Arabidopsis thaliana]	128473	MPGSEPSETQWPAKRVRDTYVDFFRGKGHKFWPSSPVVPHNDPTLLFANAGMNQYKPIFLGTADPNTELSKLSRACNTQKCIRAGGKHNDLDDVGKDTYHHTFFEMLGNWSFGDYFKKEAIEWAWELLTKVYGLPTDRIYATYFGGDEKAGLQPDNEARDIWLKVLPSGRVLPFGCKDNFWEMGDTGPCGPCTEIHYDRIGNRDAASLVNNDDPTCLEIWNLVFIQFNRESDGSLKPLPAKHVDTGMGFERLTSVLQNKMSNYDTDVFMPIFDDIQKATGARPYSGKVGPEDVDRVDMAYRVVADHIRTLSFAIADGSRPGNEGREYVLRRILRRAVRYGKEILKAEEGFFNGLVSSVIRVMGDVFTELKEHEKKITDIIKEEEASFCKTLAKGIEKFR…	83|104	2.5|2.5	12|12	5|5	5|5	2|2	2|2	1.773	0.517	2	2	-	-	---	1.128	1	2	-	-	0.646	1.582	2	2	-	-	---	0.878	1	2	-	-	gi|5734779|gb|AAD50044.1|AC007980_9	100	0	gi|5734779|gb|AAD50044.1|AC007980_9	cytosolic tRNA-Ala synthetase [Arabidopsis thaliana] >gi|31711780|gb|AAP68246.1| At1g50200 [Arabidopsis thaliana]	100	0	sp|P36428|SYA_ARATH	Alanine--tRNA ligase OS=Arabidopsis thaliana GN=ALATS PE=1 SV=3	99.17	0	F4I4Z2	F4I4Z2_ARATH Alanyl-tRNA synthetase OS=Arabidopsis thaliana GN=ALATS PE=3 SV=1	YOR335c
157	gi|137476|sp|P23957.1|VATL_AVESA	RecName: Full=V-type proton ATPase 16 kDa proteolipid subunit; Short=V-ATPase 16 kDa proteolipid subunit; AltName: Full=Vacuolar proton pump 16 kDa proteolipid subunit >gi|166549|gb|AAA32712.1| H+-ATPase [Avena sativa] >gi|108925912|gb|ABG23316.1| v	18549	MSSVFSGDETAPFFGFLGAAAALVFSCMGAAYGTAKSGVGVASMGVMRPELVMKSIVPVVMAGVLGIYGLIIAVIISTGINPKAKPYFLFDGYAHLSSGLACGLAGLAAGMAIGIVGDAGVRANAQQPKLFVGMILILIFAEALALYGLIVGIILSSRAGQSRAD	-|26	-|10.9	-|88	-|1	-|1	-|1	-|1	-	---	-	-	-	-	-	---	-	-	-	-	-	---	-	-	-	-	-	---	-	-	-	-	gi|137476|sp|P23957.1|VATL_AVESA	100	3e-60	gi|137476|sp|P23957.1|VATL_AVESA	RecName: Full=V-type proton ATPase 16 kDa proteolipid subunit; Short=V-ATPase 16 kDa proteolipid subunit; AltName: Full=Vacuolar proton pump 16 kDa proteolipid subunit >gi|166549|gb|AAA32712.1| H+-ATPase [Avena sativa] >gi|108925912|gb|ABG23316.1| vacuolar ATPase subunit c [Triticum aestivum] >gi|256708475|gb|ACV20869.1| vacuolar H+-ATPase subunit c [Leymus chinensis]	100	1e-60	sp|P23957|VATL_AVESA	V-type proton ATPase 16 kDa proteolipid subunit OS=Avena sativa GN=VATP-P1 PE=2 SV=1	100	3e-59	C8CG66	C8CG66_LEYCH Vacuolar H+-ATPase subunit c OS=Leymus chinensis GN=LVAP1 PE=2 SV=1	YPL234c
158	gi|295687231|gb|ADG27841.1|	triosephosphate isomerase [Gossypium hirsutum]	40495	MAMISTYCPHFNGLHRSSPKLDSSQSQSFLQHINSQLRLASSRKPCRAVTAMAGSGKFFVGGNWKCNGTKDSITKLVSDLNSAKLETDVDVVVSPPFVYLDQVTASLTSRIEVSAQNSWIGKGGAFTGEISVEQLKDIGCKWVILGHSERRHIIGEDDQFIGKKAAYALNEGLGVIACIGELLEEREAGKTFDVCFRQLKAFADVVPSWDNIVIAYEPVWAIGTGKVATPQQAQEVHVAVHDWLKKNVSEEVASKTRIIYGGSVNGSNCAELAKQEDIDGFLVGGASLKGPEFATIVNSVTSKKVAA	307|300	18.9|16.0	-|-	13|16	1|1	5|4	1|1	---	---	1	-	-	-	---	---	1	-	-	-	---	---	1	-	-	-	---	---	1	-	-	-	gi|295687231|gb|ADG27841.1|	100	1e-176	gi|295687231|gb|ADG27841.1|	triosephosphate isomerase [Gossypium hirsutum]	82.15	2e-138	sp|Q9M4S8|TPIC_FRAAN	Triosephosphate isomerase, chloroplastic OS=Fragaria ananassa GN=TPI PE=2 SV=1	100	1e-175	D6N3G7	D6N3G7_GOSHI Triosephosphate isomerase OS=Gossypium hirsutum PE=2 SV=1	YDR050c
159	gi|374639359|gb|AEZ55668.1|	4-hydroxy-3-methylbut-2-enyl diphosphate synthase [Salvia miltiorrhiza]	95700	MATGAVPASFTGLKSRDHRGLGFGKSSDFVRVSDLQRVKFGRSKVAVIRNSNNPGSETVELKPASEGSPLLVPRQKYCESIHKTVRRKTRTVMVGNVALGSEHPIRIQTMTTTDTKDIAGTVEQVMRIADQGADLVRITVQGRKEADACFEIKNSLVQKNYNIPLVADIHFAPPVAMRVAECFDKIRVNPGNFADRRAQFEQLEYTDDDYQKELEHIEKVFSPLVEKCKKYGRAMRIGTNHGSLSDRIMSYYGDSPRGMVESAFEYARICRKLDFHNFVFSMKASNPVIMVQAYRLLVAEMNVLGWDYPLHLGVTEAGEGEDGRMKSAIGIGTLLMDGLGDTIRVSLTEPPEEEIDPCRRLANLGMKTAELQKGVAPFEEKNRRYFDFQRRNGQLPVQK…	173|93	5.4|5.5	-|-	7|4	2|4	3|3	1|3	---	---	1	1	-	-	---	---	1	1	-	-	---	---	1	1	-	-	---	---	1	1	-	-	gi|374639359|gb|AEZ55668.1|	100	0	gi|374639359|gb|AEZ55668.1|	4-hydroxy-3-methylbut-2-enyl diphosphate synthase [Salvia miltiorrhiza]	84.23	0	sp|F4K0E8|ISPG_ARATH	4-hydroxy-3-methylbut-2-en-1-yl diphosphate synthase, chloroplastic OS=Arabidopsis thaliana GN=ISPG PE=1 SV=1	100	0	H6VLE4	H6VLE4_SALMI 4-hydroxy-3-methylbut-2-enyl diphosphate synthase OS=Salvia miltiorrhiza GN=HDS PE=3 SV=1	CT057
160	gi|2388889|emb|CAA75056.1|	calmodulin [Solanum lycopersicum]	15798	QIAEFKEAFSLFDKDGDGCITTKELGTVMRSLGQNPTEAELQDMINEVDADGNGTIDFPEFLNLMARKMKDTDSEEELKEAFRVFDEDQNGFISAAELRHVMTNLGEKLTDEEVDEMI	66|108	24.6|13.6	-|-	5|6	4|6	2|1	1|1	---	---	-	1	-	-	---	---	-	1	-	-	---	---	-	1	-	-	---	---	-	1	-	-	gi|2388889|emb|CAA75056.1|	100	4e-62	gi|2388889|emb|CAA75056.1|	calmodulin [Solanum lycopersicum]	99.15	2e-62	sp|P04353|CALM_SPIOL	Calmodulin OS=Spinacia oleracea PE=1 SV=2	100	6e-61	O24033	O24033_SOLLC Calmodulin (Fragment) OS=Solanum lycopersicum GN=N6 PE=2 SV=1	SPAC3A12.14
161	gi|19571100|dbj|BAB86525.1|	hypothetical protein [Oryza sativa Japonica Group] >gi|20804645|dbj|BAB92334.1| hypothetical protein [Oryza sativa Japonica Group]	8180	MLSAAINIEAGGISRRAANPPPPCGVAGGHRLAAAGRSAAECRARPGLWRSTGGGCRRQARVGGAAGGQSMASGAAALAD	-|23	-|18.8	-|-	-|1	-|1	-|1	-|1	-	---	-	-	-	-	-	---	-	-	-	-	-	---	-	-	-	-	-	---	-	-	-	-	gi|19571100|dbj|BAB86525.1|	100	2e-08	gi|19571100|dbj|BAB86525.1|	hypothetical protein [Oryza sativa Japonica Group] >gi|20804645|dbj|BAB92334.1| hypothetical protein [Oryza sativa Japonica Group]	-	-	-	-	100	3e-07	Q8S0N7	Q8S0N7_ORYSJ Putative uncharacterized protein P0510F09.8 OS=Oryza sativa subsp. japonica GN=P0692C11.30 PE=4 SV=1	-
162	gi|20978445|gb|AAC79946.2|	ATP synthase beta subunit [Biebersteinia orphanidis]	54680	IGPVLDVAFPPGKMPXIYNALVVKGRDTVGQQINVTCEVQQLLGNNRVKAVAMSATDXLTRGMEVIDTGAPLSVPVGGATLGRIFNVLGEPVDNLGPVDTRTTSPIHKSAPAFIQLDTKLSIFETGIKVVDLLAPYRRGGKIGLFGGAGVGKTVLIMELINNIAKAHGGVSVFGGVGERTREGNDLYMEMKESGVINEQNIAESKVALVYGQMNEPPGARMRVGLTALTMAEYFRDVNEQBVLLFIDNIFRFVQAGSEVSALLGRMPSAVGYQPTLSTEMGTLQERITSTXEGSITSIQAVYVPADDLTDPAPATTFAHLDATTVLSRGLAAKGIYPAVDPLDSTSTMLQPRIVGEEHYETAQRVKETLQRYKELQDIIAILGLDELSEEDRLTVARAR…	-|4096	-|43.6	-|-	-|157	-|1	-|15	-|1	-	---	-	1	-	-	-	---	-	1	-	-	-	---	-	1	-	-	-	---	-	1	-	-	gi|20978445|gb|AAC79946.2|	100	0	gi|20978445|gb|AAC79946.2|	ATP synthase beta subunit [Biebersteinia orphanidis]	97.15	0	sp|Q09G39|ATPB_PLAOC	ATP synthase subunit beta, chloroplastic OS=Platanus occidentalis GN=atpB PE=3 SV=1	100	0	O98424	O98424_9ROSI ATP synthase subunit beta (Fragment) OS=Biebersteinia orphanidis GN=atpB PE=3 SV=2	all5039
163	gi|297741005|emb|CBI31317.3|	unnamed protein product [Vitis vinifera]	49641	MAEEEVVVVAGASPAPSDHKRKLEDLEPEAPEQAEPDGVQGADAGDYVANDESEAKRPRVEDQDDDLATENGYQREKEDEVIKENVELTVENAQSQEAPHPTEEAPEAVNDEQPSTDNEQKEDTQEPSIENPQLENPQQPTGEEFEKPAEEIPQQEVGDVPSAEVQQQPTSETQTMSRKMEVPNNKVGVLIGKAGDTIRFLQYNSGAKIQITRDADADPYSASRPVELIGSLENINKAEKLIKDVIAEADAGGSPSLVARGFATAQAVGAAEQVQIQVPNEKVGLIIGKGGETIKSLQTRSGARIQLIPQHLPEGDQSKERTVRVTGDKKQIEMAREMIKEVMNQIWLLPFTWAQHCFLGVDIDNHYSLPSTEERYQALISRLQDVNSCL	215|196	4.4|4.4	1|1	5|4	5|4	1|1	1|1	1.192	0.782	2	3	-	-	---	1.732	-	2	-	-	0	0.433	3	3	-	-	---	0.737	-	2	-	-	gi|297741005|emb|CBI31317.3|	100	0	gi|297741005|emb|CBI31317.3|	unnamed protein product [Vitis vinifera]	36.09	4e-20	sp|Q96AE4|FUBP1_HUMAN	Far upstream element-binding protein 1 OS=Homo sapiens GN=FUBP1 PE=1 SV=3	96.02	0	F6HN29	F6HN29_VITVI Putative uncharacterized protein OS=Vitis vinifera GN=VIT_18s0001g05630 PE=4 SV=1	-
164	gi|51104307|gb|AAT96699.1|	putative receptor-like protein kinase 1 [Musa acuminata]	21831	SGRCIGDQPAMDYYIVASTRFTSKVLSTTAILRYSNSGGTTAGPPPGGPTIQIDWSLNQARSIRWNLTASGPRPNPQGSYHYGLVNTTRTIRLANSAPFINGKQRYAVNSVSFIPADTPLKVADFYKIPGVFSLGSISDNPTFRGGYLQTSVMAANFRDYVEIVFENYENTMQSWHIDIYSYGI	22|-	8.7|-	21|-	1|-	1|-	1|-	1|-	---	-	-	-	-	-	---	-	-	-	-	-	---	-	-	-	-	-	---	-	-	-	-	-	gi|51104307|gb|AAT96699.1|	100	8e-95	gi|51104307|gb|AAT96699.1|	putative receptor-like protein kinase 1 [Musa acuminata]	46.84	4e-40	sp|Q00624|ASOL_BRANA	L-ascorbate oxidase homolog OS=Brassica napus GN=Bp10 PE=2 SV=1	100	7e-94	Q64GB7	Q64GB7_MUSAC Putative receptor-like protein kinase 1 (Fragment) OS=Musa acuminata PE=4 SV=1	-
165	gi|115480319|ref|NP_001063753.1|	Os09g0531100 [Oryza sativa Japonica Group] >gi|113631986|dbj|BAF25667.1| Os09g0531100 [Oryza sativa Japonica Group]	45130	MSTAAAAAASTSLRPASQSALRLAGSPRRWCWGAPALSPARRAFHADTRRRKTLLYATDKGPEESLKKTIEVDRLIEMLRDANPRELDQIVVENVLAFDEGFWVRLAARIDLCKSDDDKKDYEELAENVMNIVDRLVHKTDEKIEQSTDVLKAIISPVMHEGENATWPPRDPEALKLMEKEISNREKEGQLDEGFLSEVNAQLRQAKQDGDKPGLQAMLQKVLQLYASNFLQKRSYAYKGGEVIVPESFLESVIKAPENEWNKLLLDGLTVGKGNVSPEEFYAVIKKRIERVLIRTEGGSYQQRILVEYLKEIQARAEEVVKVLQGPTI	-|30	-|3.0	-|4	-|1	-|1	-|1	-|1	-	---	-	-	-	-	-	---	-	-	-	-	-	---	-	-	-	-	-	---	-	-	-	-	gi|115480319|ref|NP_001063753.1|	100	0	gi|115480319|ref|NP_001063753.1|	Os09g0531100 [Oryza sativa Japonica Group] >gi|113631986|dbj|BAF25667.1| Os09g0531100 [Oryza sativa Japonica Group]	-	-	-	-	100	0	Q652K7	Q652K7_ORYSJ Os09g0531100 protein OS=Oryza sativa subsp. japonica GN=OJ1254_E07.7 PE=4 SV=1	-
166	gi|52851186|emb|CAH58641.1|	malate dehydrogenase [Plantago major]	42415	MAKDPVRVLVTGAAGQIGYALVPMIARGIMLGPDQPVILHMLDIAPAAEALNGVKMELVDAAFPLLKGVVATTDAVEACTGVNVAVMVGGFPRKEGMERKDVMSKNVSIYKSQASALEKHAAANCKVLVVANPANTNALILKEFAPSIPEKNITCLTRLDHNRALGQVSERLSVQVSDVKNCIIWGNHSSSQYPDVNHATVKTPAGDKPVRELVADDQWLNTEFISTVQQRGAAIIKARKFSSALSAASSACDHIRDWVLGTPEGTWVSMGVYSDGSYNVPAGLIYSFPVTCKNGEWSIVQGLPIDEFSRKKLDLTAQELSEEKELAYSCLS	1089|1591	21.1|21.1	2|2	43|54	3|5	6|6	2|2	---	---	1	-	-	-	---	---	1	-	-	-	---	---	1	-	-	-	---	---	1	-	-	-	gi|52851186|emb|CAH58641.1|	100	0	gi|52851186|emb|CAH58641.1|	malate dehydrogenase [Plantago major]	92.17	3e-173	sp|P57106|MDHC2_ARATH	Malate dehydrogenase, cytoplasmic 2 OS=Arabidopsis thaliana GN=At5g43330 PE=2 SV=1	100	0	Q5ZFR7	Q5ZFR7_PLAMJ Malate dehydrogenase OS=Plantago major GN=mdh1 PE=2 SV=1	DR0325
167	gi|460396313|ref|XP_004243720.1|	PREDICTED: uncharacterized protein LOC101256396 [Solanum lycopersicum]	34976	MMQLGVKTSGTAVACSHFLSPRAFPPTAIAITRRHLKPYCLYRSIKMSAEQIVEHVVLFKAKPDADPSKLTAMVNNLNSLTSLNQVVHLSSGPLIRDRSSSFSFTHILHSRYKSKSDLADYSAHPDHVSVVRQYVLPVVDDIMAVDWVPIEFSGPTGVPPGSAMRLTFLKLKENLGENEKSQVLSAVGGIKEKFSGIEQLTVGENFSPGRAKGFSIASIAVFKGVDELEALESQTELANEQKEKVKEFLDGAVVVDYAVLPTQSASL	114|86	4.1|4.1	-|-	5|3	5|3	1|1	1|1	---	1.014	1	3	-	-	---	1.334	1	3	-	-	---	1.132	1	3	-	-	---	1.674	1	3	-	*	gi|460396313|ref|XP_004243720.1|	100	3e-155	gi|460396313|ref|XP_004243720.1|	PREDICTED: uncharacterized protein LOC101256396 [Solanum lycopersicum]	-	-	-	-	59.91	1e-71	A5AMX3	A5AMX3_VITVI Putative uncharacterized protein OS=Vitis vinifera GN=VITISV_041106 PE=4 SV=1	-
168	gi|167997271|ref|XP_001751342.1|	predicted protein [Physcomitrella patens subsp. patens] >gi|162697323|gb|EDQ83659.1| predicted protein [Physcomitrella patens subsp. patens]	76836	MENQVKGMMSGGLDVSDLKNANTVGGGVGDTFGEDAATEEQPFTPWARIVASGLELLRDPRYNKGLAFTEVERDRHYLRGLLPPTVISQELQVERILENVRSYQNPLEKYIALMDLQERNERLFYKVLIDHVEELLPIVYTPVVGEACQKYGNIFRRPHGLYISLKDRGHVLELLKNWPEKNVEVIVVTDGERILGLGDLGLNGMGIPIGKLALYTALGGVRPSSTLPIAIDVGTNNEALLKNPFYIGLRQRRTTGQEYDELLHEFMIACKQAYGEKVLIQFEDFANHNAFRLLQKYATTHLVFNDDIQGTAAVALAGLVAALPITGGTLADHKFLFLGAGEAGTGIAEIIALEVSKQGKITVEEARKAIHLVDSKGLVTKSRYESLQEHKRPYAHEHP…	28|-	2.0|-	-|-	1|-	1|-	1|-	1|-	---	-	-	-	-	-	---	-	-	-	-	-	---	-	-	-	-	-	---	-	-	-	-	-	gi|167997271|ref|XP_001751342.1|	100	0	gi|167997271|ref|XP_001751342.1|	predicted protein [Physcomitrella patens subsp. patens] >gi|162697323|gb|EDQ83659.1| predicted protein [Physcomitrella patens subsp. patens]	72.01	0	sp|P12628|MAOX_PHAVU	NADP-dependent malic enzyme OS=Phaseolus vulgaris GN=ME1 PE=2 SV=1	100	0	A9RBL0	A9RBL0_PHYPA Malic enzyme OS=Physcomitrella patens subsp. patens GN=PHYPADRAFT_111236 PE=3 SV=1	ZsfcA
169	gi|356567949|ref|XP_003552177.1|	PREDICTED: uncharacterized protein At2g37660, chloroplastic-like [Glycine max]	33756	MAESEKSTVLVTGAGGRTGQIVYKKLKERPNQYVARGLVRTDESKQNIGAADDVFVGDIRHAESIVPAIQGIDALIILTSAVPQIKPGFDPTKGQRPEFYFDDGAYPEQVDWIGQKNQIDAAKAAGVKHIVLVGSMGGTDLNHPLNSLGNGNILVWKRKAEQYLADSGIPYTIIRAGGLQDKDGGLRELLVGKDDELLQTETRTITRSDVAEVCIQALNYEEAKFKAFDLASKPEGAGSATKDLKALFSQITTRF	105|114	16.5|12.9	1|3	4|4	2|4	3|2	1|2	0.547	0.571	2	3	-	-	1.312	1.559	2	3	-	-	1.626	1.555	2	3	*	-	1.05	1.294	2	3	-	-	gi|356567949|ref|XP_003552177.1|	100	9e-147	gi|356567949|ref|XP_003552177.1|	PREDICTED: uncharacterized protein At2g37660, chloroplastic-like [Glycine max]	81.89	3e-123	sp|O80934|Y2766_ARATH	Uncharacterized protein At2g37660, chloroplastic OS=Arabidopsis thaliana GN=At2g37660 PE=1 SV=2	100	9e-146	I1N2I4	I1N2I4_SOYBN Uncharacterized protein OS=Glycine max GN=Gma.56953 PE=4 SV=1	sll1218
170	gi|443954|emb|CAA78459.1|	cyclophilin [Nicotiana tabacum]	7336	PGFLSMANAGPGTNGSQFFICTAKTEWLDGKHVVFGQVVEGYDVIKKAEAVGSGSG	135|80	26.8|26.8	-|-	4|1	4|1	1|1	1|1	2.841	---	2	1	-	-	---	---	1	-	-	-	1.061	---	2	1	-	-	---	---	1	-	-	-	gi|443954|emb|CAA78459.1|	100	2e-25	gi|443954|emb|CAA78459.1|	cyclophilin [Nicotiana tabacum]	92.86	3e-23	sp|P21568|CYPH_SOLLC	Peptidyl-prolyl cis-trans isomerase OS=Solanum lycopersicum GN=CYP PE=2 SV=1	100	3e-24	Q40493	Q40493_TOBAC Cyclophilin (Fragment) OS=Nicotiana tabacum PE=2 SV=1	YDR155c
171	gi|266567|sp|P29677.1|MPPA_SOLTU	RecName: Full=Mitochondrial-processing peptidase subunit alpha; AltName: Full=Alpha-MPP; AltName: Full=Ubiquinol-cytochrome-c reductase subunit II; Flags: Precursor >gi|21493|emb|CAA46990.1| mitochondrial processing peptidase [Solanum tuberosum]	62172	MYRCASSRLSSLKARQGNRVLTRFSSSAAVATKPSGGLFSWITGDTSSSVTPLDFPLNDVKLSPPLPDYVEPAKTQITTLANGLKVASEASVNPAASIGLYVDCGSIYETPASYGATHLLERMAFKSTLNRSHLRIVREIEAIGGNVTASASREHMIYTYDALKTYVPQMVEMLADCVRNPAFLDWEVKEQLEKVKAEISEYSKNPQHLLLEAVHSAGYAGPYGNSLMATEATINRLNSTVLEEFVAENYTAPRMVLAASGVEHEEFLKVAEPLLSDLPKVATIEEPKPVYVGGDYRCQADAEMTHFALAFEVPGGWMSEKESMTLTVLQMLMGGGGSFSAGGPGKGMYSRLYLRVLNQYPQIHAFSAFSSIYNNTGLFGIQGTTSSDFGPQAVDVAVK…	48|-	2.0|-	17|-	1|-	1|-	1|-	1|-	---	-	1	-	-	-	---	-	-	-	-	-	---	-	1	-	-	-	---	-	-	-	-	-	gi|266567|sp|P29677.1|MPPA_SOLTU	100	0	gi|266567|sp|P29677.1|MPPA_SOLTU	RecName: Full=Mitochondrial-processing peptidase subunit alpha; AltName: Full=Alpha-MPP; AltName: Full=Ubiquinol-cytochrome-c reductase subunit II; Flags: Precursor >gi|21493|emb|CAA46990.1| mitochondrial processing peptidase [Solanum tuberosum]	100	0	sp|P29677|MPPA_SOLTU	Mitochondrial-processing peptidase subunit alpha OS=Solanum tuberosum GN=MPP PE=1 SV=1	84.72	0	Q41440	Q41440_SOLTU Mitochondrial processing peptidase OS=Solanum tuberosum GN=MPP PE=2 SV=1	YHR024c
172	gi|440583665|emb|CCH47171.1|	similar to cell division protein ftsZ homolog 2-1 [Lupinus angustifolius]	61326	MATCMSTSFAPSNSRHLARVLAVPGGRTLTENHNGRSCFMKMYENKYGFSGGNRKSGLLQVKCSANSNSVYHGKDPFLDLHPEVSMLRGTGSGGVNNLIKDIPNGNVAESLEPISSSSNYNEAKIKVIGVGGGGSNAVNRMIQSSMNGVEFWIVNTDVQAMRVSPVFPDNRLQIGQELTRGLGAGGNPEIGMNAAKESRESIEEAVHGADMVFVTVEYYSITEETLVIEKRIANEKLQETLKLSLNGLFGNLAGMGGGTGTGGAPIIAAVAKSMGILTVGIVTTPFSFEGRRRAVQAQEGIAALRDSVDTLIVIPNDKLLTAVAPSTPVTEAFNLADDILRQGVRGISDIITIPGLVNVDFADVRAIMADAGSSLMGIGTATGKTRARDAALNAIQSPL…	-|302	-|9.4	-|-	-|10	-|1	-|3	-|1	-	---	-	-	-	-	-	---	-	-	-	-	-	---	-	-	-	-	-	---	-	-	-	-	gi|440583665|emb|CCH47171.1|	100	0	gi|440583665|emb|CCH47171.1|	similar to cell division protein ftsZ homolog 2-1 [Lupinus angustifolius]	66.16	2e-174	sp|O82533|FTZ21_ARATH	Cell division protein FtsZ homolog 2-1, chloroplastic OS=Arabidopsis thaliana GN=FTSZ2-1 PE=1 SV=2	81.15	1e-111	C5YYS8	C5YYS8_SORBI Putative uncharacterized protein Sb09g021830 OS=Sorghum bicolor GN=Sb09g021830 PE=4 SV=1	sll1633
173	gi|224144020|ref|XP_002325159.1|	predicted protein [Populus trichocarpa] >gi|222866593|gb|EEF03724.1| predicted protein [Populus trichocarpa]	69620	MLSTWGKFIVCFLWDLQGILRVSCSTSGPLKVMISGAPASGKGTQCELIVKKFGLVHISTGDLLRAEVSAETEIGNKAKEFMNAGRLVPDEIVTAMVTARLSLEDAKEKGWLLDGYPRSSAQAESLEKLNVRPDIYVVLDVPDEILIDRCVGRRLDPETGKIYHVKNFPPETEEMKARLITRPDDTEEKVKARLDIYKKNAEAILSTYSNIMVKLDGNRSKEVVFKEIDSLLSQVQRDEVKLVKSGISLQDKWRGIPTRLNNIPHSREIRNYFYDDVLQATQRAVNDGRTRLRVDINIPELNPEMDVYRIGTLMELVRVIALSFSDDGKHVKVCVQGSMGKGALAGMPLQLAGTRNILEFMDWGDYGAKGTFIKIGSIGEQEVSEEDDMFILVAPQNAV…	-|127	-|4.4	-|-	-|6	-|6	-|2	-|2	-	---	-	-	-	-	-	---	-	1	-	-	-	---	-	-	-	-	-	---	-	1	-	-	gi|224144020|ref|XP_002325159.1|	100	0	gi|224144020|ref|XP_002325159.1|	predicted protein [Populus trichocarpa] >gi|222866593|gb|EEF03724.1| predicted protein [Populus trichocarpa]	61.68	1e-73	sp|Q9FIJ7|KADC2_ARATH	Probable adenylate kinase 2, chloroplastic OS=Arabidopsis thaliana GN=At5g47840 PE=2 SV=1	100	0	B9IMJ2	B9IMJ2_POPTR Predicted protein OS=Populus trichocarpa GN=POPTRDRAFT_912756 PE=3 SV=1	BH0155
174	gi|116778636|gb|ABK20944.1|	unknown [Picea sitchensis]	15405	MAACNAKWGYGNPLRELASRQYAHNTRVVPKITVKGIRAEGTPATINPSIRKNEEKVVDNVPIAELSKPITPYCRCWRSQTFPLCDGSHVKHNKATGDNVGPLLLKK	81|123	11.2|11.2	11|11	3|4	3|4	1|1	1|1	0.704	0.957	2	3	-	-	1.019	0.605	2	2	-	*	1.362	1.032	2	3	-	-	0.879	0.534	2	2	-	*	gi|116778636|gb|ABK20944.1|	100	5e-58	gi|116778636|gb|ABK20944.1|	unknown [Picea sitchensis]	59.68	1e-15	sp|C3ZWH9|CID2A_BRAFL	CDGSH iron-sulfur domain-containing protein 2 homolog A OS=Branchiostoma floridae GN=BRAFLDRAFT_285975 PE=3 SV=1	100	7e-57	A9NJY3	A9NJY3_PICSI Putative uncharacterized protein OS=Picea sitchensis PE=4 SV=1	-
175	gi|20009|emb|CAA43429.1|	ribonucleoprotein [Nicotiana tabacum]	36308	ASTCSTSSLYLFTQKPKFSVEHLSLSTYNAHFNFKINSTKLKAHFPISSLYRSSIFLSTCASVSDGVEVVQEDDEEEVALSAEEEEEIEEKEESVESESVEGGRLYVGNLPFSMTSSQLSEIFAEAGTVANVEIVYDRVTDRSRGFAFVTMGSVEEAKEAIRLFDGSQVGGRTVKVNFPEVPRGGEREVMSAKIRSTYQGFVDSPHKLYVANLSWALTSQGLRDAFADQPGFMSAKVIYDRSSGRSRGFGFITFSSAEAMKSALDTMNEVVRIHSDEVSWRPFGISLFLTVL	139|55	7.5|7.5	2|2	7|5	7|3	2|2	2|1	0.805	---	4	-	-	-	0.709	---	4	-	-	-	1.871	---	4	-	*	-	1.234	---	4	-	-	-	gi|20009|emb|CAA43429.1|	100	2e-141	gi|20009|emb|CAA43429.1|	ribonucleoprotein [Nicotiana tabacum]	93.55	3e-122	sp|P19684|ROC5_NICSY	33 kDa ribonucleoprotein, chloroplastic OS=Nicotiana sylvestris PE=1 SV=1	100	2e-140	Q08940	Q08940_TOBAC Ribonucleoprotein (Precursor) OS=Nicotiana tabacum PE=2 SV=1	all2928
176	gi|66276267|gb|AAY44148.1|	ATP synthase beta subunit [Coriaria ruscifolia]	57417	QIIGPVLDVVFPPGKMPNIYNALVVKGRDTVGQQINVTCEVQQLLGNNRVRAVAMSATDGLMRGMEVIDTGAALSVPVGGATLGRIFNVLGEPXDNLGPVDTRTTSPIHRSAPAFIQLDTKLSIFETGXKVVDLLAPYRRGGKIGLFGGAGVGKTVLIXELINNIAKAHGGVSVFGGVGERTREGNDLYMXMKESGVINEQNIAESKVALVYGQMNEPPGARMRVGLTALTMAEYFRDVNEQDVLLFIDNIFRFVQAGSEVSALLGRMPSAVGYQPTLSTEMGSLQERITSTKEGSITSIQAVYVPADDLTDPAPATTFAHLDATTVLSRGLAAKGIYPAVDPLDSTSTMLQPRIVGEEHYETAQRVKETLQRYKELQDIIAILGLDELSEEDRLTVAR…	5410|-	49.5|-	-|-	214|-	5|-	20|-	3|-	---	-	1	-	-	-	---	-	1	-	-	-	---	-	1	-	-	-	---	-	1	-	-	-	gi|66276267|gb|AAY44148.1|	100	0	gi|66276267|gb|AAY44148.1|	ATP synthase beta subunit [Coriaria ruscifolia]	97.67	0	sp|Q6QBP2|ATPB_CASSA	ATP synthase subunit beta, chloroplastic OS=Castanea sativa GN=atpB PE=3 SV=1	100	0	Q29S96	Q29S96_9ROSI ATP synthase subunit beta (Fragment) OS=Coriaria ruscifolia GN=atpB PE=3 SV=1	all5039
177	gi|217072622|gb|ACJ84671.1|	unknown [Medicago truncatula]	35052	MQHELEQWKEQFSHLWNVANDYLRDVPPNQLYAAAAIAIFTTLLLLFLRVLKRTESNTIVLTGLSGSGKTVLFYQLRDGSTHQGTVTSMEPNEGTFILHGETAKKGKIKPVHIVDVPGHSRLRPKLDEFLPQAAGIVFVVDALDFLPNCRAASEYLYDLLTKGSVVRKKIPLLILCNKTDKVTAHTKEFIRRQIEKEIDKLRSSRSAVSEADVTNEFTLGVPGEPFSFTQCSNKVTTADASGLTGEISQLQEFIREYVKQ	-|22	-|4.6	-|6	-|1	-|1	-|1	-|1	-	---	-	-	-	-	-	---	-	-	-	-	-	---	-	-	-	-	-	---	-	-	-	-	gi|217072622|gb|ACJ84671.1|	100	5e-141	gi|217072622|gb|ACJ84671.1|	unknown [Medicago truncatula]	32.52	2e-24	sp|Q54XX1|SRPRB_DICDI	Signal recognition particle receptor subunit beta OS=Dictyostelium discoideum GN=srprb PE=3 SV=1	100	5e-140	B7FIU2	B7FIU2_MEDTR Putative uncharacterized protein OS=Medicago truncatula PE=2 SV=1	YKL154w
178	gi|460371392|ref|XP_004231523.1|	PREDICTED: glyceraldehyde-3-phosphate dehydrogenase A, chloroplastic-like [Solanum lycopersicum]	51987	MASAALSVANSSVHVSKNKGSFSEFTGLRTSSAVPFGVGWKTNVDLLSLVAYQTSVISGAGKNNNNNSRVVEAKLKVAINGFGRIGRNFLRCWHGRKDSPLDVIAINDSGGVKQASHLLKYDSTLGIFDADVKPVGTDGISVDGKIIKVVSDRNPINLPWKDLGVDLVIEGTGVFVDREGAGKHIQAGAKKVLITAPGKGDIPTYVVGVNADLYSPDESIISNASCTTNCLAPFVKVLDQKFGIIKGTMTTTHSYTGDQRLLDASHRDLRRARAAALNIVPTSTGAAKAVALVLPSLKGKLNGIALRVPTPNVSVVDLVVQVSKKTFAEEVNAAFRESADNELAGILSVCDEPLVSVDFRCSDVSSTVDASLTMVMGDDMVKVIAWYDNEWGYSQRVVD…	809|781	28.4|30.8	-|-	40|39	2|6	8|9	1|2	0.537	0.768	2	5	-	-	---	0.772	-	2	-	-	1.524	1.271	2	5	-	-	---	0.965	-	2	-	-	gi|460371392|ref|XP_004231523.1|	100	0	gi|460371392|ref|XP_004231523.1|	PREDICTED: glyceraldehyde-3-phosphate dehydrogenase A, chloroplastic-like [Solanum lycopersicum]	93.1	8e-105	sp|P09672|G3PA_SINAL	Glyceraldehyde-3-phosphate dehydrogenase A, chloroplastic (Fragment) OS=Sinapis alba GN=GAPA PE=2 SV=1	98.39	2e-156	Q8VWP3	Q8VWP3_CAPAN Glyceraldehyde-3-phosphate dehydrogenase (Fragment) OS=Capsicum annuum GN=gapA2 PE=2 SV=1	sll1342
179	gi|15234551|ref|NP_192979.1|	Monocopper oxidase-like protein SKU5 [Arabidopsis thaliana] >gi|334186448|ref|NP_001190704.1| Monocopper oxidase-like protein SKU5 [Arabidopsis thaliana] >gi|38258655|sp|Q9SU40.1|SKU5_ARATH RecName: Full=Monocopper oxidase-like protein SKU5; AltName	75198	MDLFKILLLVFFVNISFCFAADPYSFYNFEVSYITASPLGVPQQVIAINGKFPGPTINVTTNENLVVNVRNKLDEGLLLHWNGIQQRRVSWQDGVLGTNCPIPPKWNWTYEFQVKDQIGSFFYFPSLHFQRASGGFGSFVVNPRAIIPVPFSTPDGDITVTIGDWYIRNHTALRKALDDGKDLGMPDGVLINGKGPYRYNDTLVADGIDFETITVHPGKTYRLRVSNVGISTSLNFRIQGHNLVLAESEGSYTVQQNYTSLDIHVGQSYSFLVTMDQNASSDYYIVASARVVNETIWRRVTGVGILKYTNSKGKAKGQLPPGPQDEFDKTFSMNQARSIRWNVSASGARPNPQGSFKYGSINVTDVYVLRNMPPVTISGKRRTTLNGISFKNPSTPIRL…	-|43	-|2.2	-|2	-|1	-|1	-|1	-|1	-	---	-	-	-	-	-	---	-	-	-	-	-	---	-	-	-	-	-	---	-	-	-	-	gi|15234551|ref|NP_192979.1|	100	0	gi|15234551|ref|NP_192979.1|	Monocopper oxidase-like protein SKU5 [Arabidopsis thaliana] >gi|334186448|ref|NP_001190704.1| Monocopper oxidase-like protein SKU5 [Arabidopsis thaliana] >gi|38258655|sp|Q9SU40.1|SKU5_ARATH RecName: Full=Monocopper oxidase-like protein SKU5; AltName: Full=Skewed roots; Flags: Precursor >gi|18158154|gb|AAL62306.1|AF439406_1 multi-copper oxidase-related protein [Arabidopsis thaliana] >gi|332657728|…	100	0	sp|Q9SU40|SKU5_ARATH	Monocopper oxidase-like protein SKU5 OS=Arabidopsis thaliana GN=SKU5 PE=1 SV=1	98.25	0	D7M114	D7M114_ARALL Putative uncharacterized protein OS=Arabidopsis lyrata subsp. lyrata GN=ARALYDRAFT_911635 PE=4 SV=1	SPAC1F7.08
180	gi|225433514|ref|XP_002267004.1|	PREDICTED: selenium-binding protein 1 [Vitis vinifera] >gi|298205245|emb|CBI17304.3| unnamed protein product [Vitis vinifera]	60728	MEIGCCKKGPGYATPLEAMSGPRESLLYVTCIYTGSGKGKPDYLATVDVDPSSPSYSKVIHRLPVPYLGDELHHSGWNSCSSCHGDSSQERRFLVLPSLVSGRIYAIDTQKNPRGPSLHKVVEPEDILKKTGLAYPHTAHCLASGDIMVSCLGDGDGKAEGSGFLLLDSEFNVKGRWEKPGHSPSFGYDFWYQPRHKTMISSSWGAPAAFTKGFNLQHVSDGLYGKHLYVYSWPEGELKQTLDLGDSGLLPLEIRFLHDPSKDTGFVGCALTSNMVRFFKTPDGSWSHEVAISVKPLKVQNWILPDMPSLITDFLISLDDRYLYLANWLHGDVRQYNIEDPKNPVLTGQVWVGGLIQKGSPIVALAEDGTTWQSEVPEVQGKRLRGGPQMIQLSLDGKR…	61|58	5.1|8.2	-|-	3|4	2|2	2|3	1|1	---	---	1	-	-	-	---	---	1	-	-	-	---	---	1	-	-	-	---	---	1	-	-	-	gi|225433514|ref|XP_002267004.1|	100	0	gi|225433514|ref|XP_002267004.1|	PREDICTED: selenium-binding protein 1 [Vitis vinifera] >gi|298205245|emb|CBI17304.3| unnamed protein product [Vitis vinifera]	79.32	0	sp|Q9LK38|SEBP3_ARATH	Selenium-binding protein 3 OS=Arabidopsis thaliana GN=SBP3 PE=2 SV=1	100	0	D7SNS5	D7SNS5_VITVI Putative uncharacterized protein OS=Vitis vinifera GN=VIT_05s0029g00240 PE=4 SV=1	-
181	gi|6094048|sp|O49884.1|RL30_LUPLU	RecName: Full=60S ribosomal protein L30 >gi|2879811|emb|CAA11256.1| ribosomal protein L30 [Lupinus luteus]	17116	MVAAKKTKKTHESINNRLALVMKSGKYTLGYKTVLKSLRSSKGKLIIIANNCPPLRKSEIEYYAMLAKVGVHHYNGNNVDLGTACGKYYRVCCLSIVDPGDSDIIKTLPGDQ	24|-	9.8|-	63|-	1|-	1|-	1|-	1|-	---	-	-	-	-	-	---	-	-	-	-	-	---	-	-	-	-	-	---	-	-	-	-	-	gi|6094048|sp|O49884.1|RL30_LUPLU	100	2e-59	gi|6094048|sp|O49884.1|RL30_LUPLU	RecName: Full=60S ribosomal protein L30 >gi|2879811|emb|CAA11256.1| ribosomal protein L30 [Lupinus luteus]	100	5e-60	sp|O49884|RL30_LUPLU	60S ribosomal protein L30 OS=Lupinus luteus GN=RPL30 PE=3 SV=1	99.11	4e-58	G7KSW7	G7KSW7_MEDTR 60S ribosomal protein L30 OS=Medicago truncatula GN=MTR_7g021030 PE=3 SV=1	SPAC9G1.03c
182	gi|348687505|gb|EGZ27319.1|	hypothetical protein PHYSODRAFT_472789 [Phytophthora sojae]	16922	KEGGRISLDDVKKNAKRALSYGRRKGVLTDAGDAGEKFLLSKATKPEHETLIKSVRGEIKRRYGVGVPAKKGRKFVKGSQEAKDHMARIRAMRKHGKAGGSFTF	23|-	6.7|-	-|-	1|-	1|-	1|-	1|-	---	-	-	-	-	-	---	-	-	-	-	-	---	-	-	-	-	-	---	-	-	-	-	-	gi|348687505|gb|EGZ27319.1|	100	2e-52	gi|348687505|gb|EGZ27319.1|	hypothetical protein PHYSODRAFT_472789 [Phytophthora sojae]	-	-	-	-	100	3e-51	G4YEV5	G4YEV5_PHYSP Putative uncharacterized protein (Fragment) OS=Phytophthora sojae (strain P6497) GN=PHYSODRAFT_472789 PE=4 SV=1	-
183	gi|51091923|dbj|BAD35192.1|	putative Tic22 [Oryza sativa Japonica Group]	37182	MPPPPPNSSSSSSSSSSLPLAAAPMSNPSAPSSSSSSSSLPPNPLAAASSFLHHHLSRLASRFAAPPRPALAAVTASAAPPGPQGASASLSLALAPDEVARALTGTPVFTVCNSSNEFVLVSDPATGLRSLGLLCFRSEDADALLTHVRMRQPVVGRGAKVVPITLDQVYMLKAEGIAFRFLPDPLQIKNALELKSGLTAFDGVPVFQSDLLVVKKQKKRYCPIYFQKVFTIFAFLAQEDIERELTKASKTSRGSALSKQIMVGSLEDVLKKMEMNERNSGWDDLIFIPPGKSLNQHINEVSA	-|28	-|4.3	-|14	-|2	-|2	-|1	-|1	-	---	-	-	-	-	-	---	-	-	-	-	-	---	-	-	-	-	-	---	-	-	-	-	gi|51091923|dbj|BAD35192.1|	100	2e-26	gi|115467056|ref|NP_001057127.1|	Os06g0213200 [Oryza sativa Japonica Group] >gi|113595167|dbj|BAF19041.1| Os06g0213200, partial [Oryza sativa Japonica Group]	64.11	9e-73	sp|Q9ZST9|TIC22_PEA	Protein TIC 22, chloroplastic OS=Pisum sativum GN=TIC22 PE=1 SV=1	100	2e-118	B8B3Y6	B8B3Y6_ORYSI Putative uncharacterized protein OS=Oryza sativa subsp. indica GN=OsI_22139 PE=4 SV=1	-
184	gi|460380663|ref|XP_004236074.1|	PREDICTED: isoaspartyl peptidase/L-asparaginase-like [Solanum lycopersicum]	38449	MGWAIALHGGAGDIPKDMPPELREPREASLRYCLQTAVDALKAQKSPLDVVEIVVRELENNLYFNAGRGSVLTSNGTVEMEACIMDGNTKNCGAVSGLTTVVNAISLARLVMEKTPHIYLAFEGAEAFAREQGVETTDSSHFITPRNIERLKQAKEANKVQVDYNTRPIPKDDKTPAPSGDSQLGTVGCVAVDSFGHLAAATSTGGLVNKMVGRIGDTPVIGAGTYANKLCAVSATGQGEAIIRATVARDVAALMEYKGLSLKEAADYVIEQSAPKGTTGLIAVSATGEVTMPFNTTGMFRACATEDGHTELAIW	-|47	-|6.3	-|-	-|3	-|2	-|2	-|1	-	---	-	-	-	-	-	---	-	-	-	-	-	---	-	-	-	-	-	---	-	-	-	-	gi|460380663|ref|XP_004236074.1|	100	0	gi|460380663|ref|XP_004236074.1|	PREDICTED: isoaspartyl peptidase/L-asparaginase-like [Solanum lycopersicum]	76.83	8e-138	sp|P50287|ASPGA_ARATH	Isoaspartyl peptidase/L-asparaginase 1 OS=Arabidopsis thaliana GN=At5g08100 PE=1 SV=2	80.13	3e-146	B9RLJ0	B9RLJ0_RICCO L-asparaginase, putative OS=Ricinus communis GN=RCOM_1467530 PE=4 SV=1	STM0847
185	gi|255583291|ref|XP_002532409.1|	Xylose isomerase, putative [Ricinus communis] >gi|223527883|gb|EEF29973.1| Xylose isomerase, putative [Ricinus communis]	63738	MKGGWILLLLLCLNTVTSGVIAAGPPTCPADLGGKCADSDEWKGEFFPGIPKIKYEGPSSKNPLAYKWYNAEEEILGKKMKDWMRFSIAFWHTFRGTGADPFGAPTKYWPWEDGTDSLAMAKRRMRANFELLDKLGVDRWCFHDRDIAPAGKTIEESNANLDEVVALAKELQGTKILPLWGTAQLFLHPRYMHGAATSSDVGVYAYAAAQVKKAIEVTHYLGGENYVFWGGREGYQSLLNTDMERELDHMARFMEAAVAYKKKIGFNGTLLIEPKPQEPTKHQYDWDAATAANFLRKYGLIDEFKLNIECNHATLSGHSCHHELETARINGLLGNIDANTGDPQIGWDTDQFMTDIAEATLVMMSVIRNGGLAPGGFNFDAKLRRESTDVEDIFIAHIG…	-|79	-|3.6	-|-	-|2	-|2	-|1	-|1	-	---	-	1	-	-	-	---	-	1	-	-	-	---	-	1	-	-	-	---	-	1	-	-	gi|255583291|ref|XP_002532409.1|	100	0	gi|255583291|ref|XP_002532409.1|	Xylose isomerase, putative [Ricinus communis] >gi|223527883|gb|EEF29973.1| Xylose isomerase, putative [Ricinus communis]	85.47	0	sp|Q9FKK7|XYLA_ARATH	Xylose isomerase OS=Arabidopsis thaliana GN=XYLA PE=2 SV=2	100	0	B9T2E0	B9T2E0_RICCO Xylose isomerase OS=Ricinus communis GN=RCOM_0077940 PE=3 SV=1	TM1667
186	gi|356509245|ref|XP_003523361.1|	PREDICTED: PP2A regulatory subunit TAP46-like [Glycine max]	57007	MDDMPLPALFEQARKIHAAATDSGADQEVVKKGCEALHRCEDMVNNLGLFSPNETKEDISTTNLKYILVPFYLAELTEKIAQDDRIQILKSSQAKLKEFISFCEAMELVPKEELESYIDGAPKTVADQRARKIARFKRQRAAESKLLEIKERKERRGRSTKAAALSTPVEAGEEEVLDDDGEEEREAWITTISLAICKALDMLDMLKKEEEMLSAVKDRQSKDGDKEFSKDVLDERAKKAEAWHRDSAVRAQYTRPSPPITCATFAQDVLEGRAKASQEHDHKHQPLIFGPASLVNGNITTERERMAAQVFQPSHRMPTMSIEEAGLKEMEIMNKWQERNVKLMEEVNSSWHNDRKSKLGEDDDDEDDDAAQEKARAWDDWKDDNPRGAGNKKLTPCG	19|-	2.3|-	-|-	1|-	1|-	1|-	1|-	---	-	-	-	-	-	---	-	-	-	-	-	---	-	-	-	-	-	---	-	-	-	-	-	gi|356509245|ref|XP_003523361.1|	100	1e-93	gi|255633996|gb|ACU17360.1|	unknown [Glycine max]	71	9e-158	sp|Q8LDQ4|TAP46_ARATH	PP2A regulatory subunit TAP46 OS=Arabidopsis thaliana GN=TAP46 PE=1 SV=2	100	0	I1JYQ8	I1JYQ8_SOYBN Uncharacterized protein OS=Glycine max GN=Gma.55151 PE=4 SV=1	-
187	gi|115442397|ref|NP_001045478.1|	Os01g0962400 [Oryza sativa Japonica Group] >gi|20140685|sp|Q94DM8.1|UFM1_ORYSJ RecName: Full=Ubiquitin-fold modifier 1; Flags: Precursor >gi|113535009|dbj|BAF07392.1| Os01g0962400 [Oryza sativa Japonica Group]	12789	MAAAGGGGAGAAGGGKVSFKIILTSDPKLPFKVFSVPEAAPFTAVLKFAAEEFKVPPQTSAIITNDGVGINPQQSAGNVFLKHGSELRLIPRDRVGALAAPF	65|128	42.2|42.2	14|14	3|6	3|6	2|2	2|2	---	0.646	1	3	-	-	---	0.464	-	3	-	-	---	0.979	1	3	-	-	---	0.456	-	3	-	-	gi|115442397|ref|NP_001045478.1|	100	5e-43	gi|115442397|ref|NP_001045478.1|	Os01g0962400 [Oryza sativa Japonica Group] >gi|20140685|sp|Q94DM8.1|UFM1_ORYSJ RecName: Full=Ubiquitin-fold modifier 1; Flags: Precursor >gi|113535009|dbj|BAF07392.1| Os01g0962400 [Oryza sativa Japonica Group]	100	2e-43	sp|Q94DM8|UFM1_ORYSJ	Ubiquitin-fold modifier 1 OS=Oryza sativa subsp. japonica GN=Os01g0962400 PE=3 SV=1	100	8e-32	A3A1S5	A3A1S5_ORYSJ Putative uncharacterized protein OS=Oryza sativa subsp. japonica GN=OsJ_04854 PE=4 SV=1	-
188	gi|17225989|gb|AAL37560.1|AF367205_1	1-deoxy-D-xylulose 5-phosphate reductoisomerase precursor [Oryza sativa]	60743	MALKVVSFPGDLAAVSFLDSNRGGAFNQLKVDLPFQTRDRRAVSLRRTCCSMQQAPPPAWPGRAVVEPGRRSWDGPKPISIVGSTGSIGTQTLDIVAENPDKFRVVALAAGSNVTLLADQVKTFKPKHVAVRNESLVDELKEALADCDWKPEIIPGEQGVIEVARHPDAVTVVTGIVGCAGLKPTVAAIEAGKDIALANKETLIAGGPFVLPLAQKHKVKILPADSEHSAIFQCIQGLPEGALRRIILTASGGAFRDWPVDKLKEVKVADALKHPNWNMGKKITVDSATLFNKGLEVIEAHYLFGAEYDDIEIVIHPQSIIHSMIETQDSSVLAQLGWPDMRIPILYTMSWPDRIYCSEVTWPRLDLCKLGSLTFKAPDNVKYPSMDLAYAAGRAGGTM…	46|-	6.6|-	6|-	2|-	2|-	2|-	2|-	---	-	-	-	-	-	---	-	-	-	-	-	---	-	-	-	-	-	---	-	-	-	-	-	gi|17225989|gb|AAL37560.1|AF367205_1	100	0	gi|17225989|gb|AAL37560.1|AF367205_1	1-deoxy-D-xylulose 5-phosphate reductoisomerase precursor [Oryza sativa]	99.79	0	sp|Q8W250|DXR_ORYSJ	1-deoxy-D-xylulose 5-phosphate reductoisomerase, chloroplastic OS=Oryza sativa subsp. japonica GN=DXR PE=2 SV=2	99.58	0	I1NJK2	I1NJK2_ORYGL Uncharacterized protein OS=Oryza glaberrima PE=4 SV=1	alr4351
189	gi|449015521|dbj|BAM78923.1|	ATP citrate lyase [Cyanidioschyzon merolae strain 10D]	56826	MAWKKIREYDAKRLLSHHMGRRLRAVQVQANRSLVESLPEQPWLASCQLVVKPDMLFGKRGKQNLVLLKADLEQAVDFAEDLIKRRGEIEVQGVRGRITTCIVEPYLPHDVEYYLSIQSVRNGNVISFSCAGGMDVEENWDKLRTVQLGPTETLQERHFAELFTDVAREQSRQVLEAYVDRLYAIFDDLDFTFLEMNPLTIAAFPGDDGQPAPEPQVWPLDLRAELDSYAGFKNARKWLNVQFPEPWGCSKWPQERLVANLDATSSASLKLTVLNPKGRIWTMVAGGGASVIYSDTVVDLGYGDELANYAEYSGNPKPEETYLFARAILELATNEPDGRPRCLLIGGGIANFTDVAATFTGIVQALKDFAGKLQVARMKLFVRRGGPNYETGLRMMEEV…	44|39	1.6|1.6	-|-	2|1	2|1	1|1	1|1	---	---	1	-	-	-	---	---	1	-	-	-	---	---	1	-	-	-	---	---	1	-	-	-	gi|449015521|dbj|BAM78923.1|	100	0	gi|449015521|dbj|BAM78923.1|	ATP citrate lyase [Cyanidioschyzon merolae strain 10D]	53.2	3e-126	sp|Q2QNG7|ACLA3_ORYSJ	ATP-citrate synthase alpha chain protein 3 OS=Oryza sativa subsp. japonica GN=ACLA-3 PE=2 SV=1	53.42	8e-123	D7UA89	D7UA89_VITVI Putative uncharacterized protein OS=Vitis vinifera GN=VIT_14s0060g00550 PE=4 SV=1	SPAC22A12.16
190	gi|460366167|ref|XP_004228963.1|	PREDICTED: importin-5-like [Solanum lycopersicum]	140167	MAAEQAQLAAILGPDSAPFETLISHLMSASNEQRSQAESIFNLIKQNDPNSLALKLANLLSSSPHHEARAMSTILLRKLLTRDDSFIWPRLTESTQSGIKSVLLRCIQHEESKSIIKKLCDTISELASSILPENNWPELLPFMFQCVTSDVPKLQESAFLIFALLAQYVGEMLVPYIKDLHTVFMQTLNNSPNPDVRIAGLSAVINFIQCLSSSNDRDRFQDLLPAMMKTLTEALNSGQEATAQEALELLIELAGTEPRFLRRQLVDVVGAMLQIAEAESLEEGTRHLAIEFVITLAEARERAPGMMRKLPQFISRLFAILMKMLLDIDDEPVWHSAEVEHEDAGETSNYSVGQECLDRLSIALGGSTIVPVASEQLPPYLAAPEWQKHHAALIALAQI…	-|39	-|2.0	-|-	-|2	-|2	-|2	-|2	-	---	-	1	-	-	-	---	-	-	-	-	-	---	-	1	-	-	-	---	-	-	-	-	gi|460366167|ref|XP_004228963.1|	100	0	gi|460366167|ref|XP_004228963.1|	PREDICTED: importin-5-like [Solanum lycopersicum]	37.45	0	sp|Q8BKC5|IPO5_MOUSE	Importin-5 OS=Mus musculus GN=Ipo5 PE=1 SV=3	89.28	0	F6GUN0	F6GUN0_VITVI Putative uncharacterized protein OS=Vitis vinifera GN=VIT_06s0004g00500 PE=4 SV=1	-
191	gi|4454012|emb|CAA23065.1|	Pollen-specific protein precursor like [Arabidopsis thaliana] >gi|7269375|emb|CAB81335.1| Pollen-specific protein precursor like [Arabidopsis thaliana]	69024	MAATCSLLASFLLCFALLSAVSFAADPFVSYDFRVSYLTASPLGVPQQVIAVNGQFPGPLLNATTNYNVVVNVFNHLDEPLLLTWPGIQMRRNSWQDGVLGTNCPIPPRWNFTYQFQVKDQIGSFFYSPSLNFQRASGGFGPIVINNRDIIPIPFPQPDGELIFIIGDWYTQDHKALRRALDSGKELGMPDGVLINGKGPYKYNSSVPDGIDYLTFHVEPGKTYRIRVHNVGISTSLNFRIQNHSLLLVETEGHYTSQANFTDFDVHVGQSYSFLVTMDQDATSDYYIVASARFVNETVWQRVTGVAILHYSNSKGPVSGPLPVPKTDVSSPWSAMSQPKTIRQNTSASGARPNPQGSFHYGQINITNTYILRSLPPTIINGALRATLNGISFVNPSTP…	-|26	-|2.3	-|4	-|1	-|1	-|1	-|1	-	---	-	-	-	-	-	---	-	-	-	-	-	---	-	-	-	-	-	---	-	-	-	-	gi|4454012|emb|CAA23065.1|	100	0	gi|4454012|emb|CAA23065.1|	Pollen-specific protein precursor like [Arabidopsis thaliana] >gi|7269375|emb|CAB81335.1| Pollen-specific protein precursor like [Arabidopsis thaliana]	100	0	sp|Q8VXX5|SKS1_ARATH	Monocopper oxidase-like protein SKS1 OS=Arabidopsis thaliana GN=SKS1 PE=1 SV=1	97.56	0	D7MG25	D7MG25_ARALL Putative uncharacterized protein OS=Arabidopsis lyrata subsp. lyrata GN=ARALYDRAFT_492307 PE=4 SV=1	SPAC1F7.08
192	gi|315364830|gb|ADU05416.1|	chloroplast Rieske-type ion-sulfur protein [Citrullus lanatus]	28861	MASSTLSSATPSQLCASRSALFCPSQALLRKPKNTQMGAKGKEVKISCQATSIPADRVPDMGKRKTMNLLLLGAIGLPTATMLYPYTYFFVPPGTGGAGGGIVAKDALGNDVLAEEWLKAHGPGDRTLTQGLRGDPTYLVVEKDKTLATYGINAVCTHLGCVVPWNAAENKFICPCHGSQYNDQGRVVRGPAPLSLALVHADVDDGKVVFVPWVETDFRTGENPWWA	62|-	8.8|-	1|-	5|-	1|-	2|-	1|-	---	-	-	-	-	-	---	-	-	-	-	-	---	-	-	-	-	-	---	-	-	-	-	-	gi|315364830|gb|ADU05416.1|	100	2e-126	gi|315364830|gb|ADU05416.1|	chloroplast Rieske-type ion-sulfur protein [Citrullus lanatus]	77.06	2e-84	sp|Q9ZR03|UCRIA_ARATH	Cytochrome b6-f complex iron-sulfur subunit, chloroplastic OS=Arabidopsis thaliana GN=petC PE=1 SV=1	100	2e-125	E7E844	E7E844_CITLA Cytochrome b6-f complex iron-sulfur subunit OS=Citrullus lanatus GN=PetC PE=2 SV=1	sll1316
193	gi|296086569|emb|CBI32204.3|	unnamed protein product [Vitis vinifera]	40516	MKGVLATEKMRKANFCKLSFFLFPFNMQVVLIYATDDPKKTEHLLALEGAKERLHLFEANLLEEGSFDSVVDGCDGVFHTASPVVIIVDDPQAQLIDPALKGTMNVLRSCAKVPSVKRKSKLWYMLSKTLAEEAAWKFAKENGIDMVTINPGWVIGPLLQPTLNLSVEEVLKLLKGDTFPNKTHRWVDVRDVAMAHIQAYELPTARGRYCLVGSILHCSETMKILRKLYPALNLPEKCADDKPYEPTYMVSQEKTKSLGIDFTPLEVSLKDTVESLREKNFVSF	29|-	4.9|-	3|-	1|-	1|-	1|-	1|-	---	-	-	-	-	-	---	-	-	-	-	-	---	-	-	-	-	-	---	-	-	-	-	-	gi|296086569|emb|CBI32204.3|	100	3e-167	gi|296086569|emb|CBI32204.3|	unnamed protein product [Vitis vinifera]	43.51	4e-49	sp|Q9S9N9|CCR1_ARATH	Cinnamoyl-CoA reductase 1 OS=Arabidopsis thaliana GN=CCR1 PE=1 SV=1	100	1e-149	F6HPX2	F6HPX2_VITVI Putative uncharacterized protein OS=Vitis vinifera GN=VIT_13s0101g00240 PE=4 SV=1	SPAC513.07
194	gi|2204236|emb|CAA74176.1|	enoyl-ACP reductase [Nicotiana tabacum]	50747	MAASAASSFQITIARPSIFSTKRISSVCSTKFCADTRKQSWNRLASSCQVSSTQNFWRNFTSTSQKLEKVVTKAKSEADGSKAASGLPIDLKGKRAFIAGIADDNGYGWAIAKSLAAAGAEILVGTWVPALNIFETSLRRGKFDESRVLPDGSLMEITKVYPLDAVFDSLEDVPEDIKSNKRYAGSSKWTVSEAAESVKEDFGSIDILVHSLANGPEVTKPLLETTRKGYLAAISASSYSYVSLLKHFLPIMNPGGSSISLTYIASERIIPGYGGGMSSAKAALESDTRVLAFEAGRKKKVRVNTISAGPLRSRAAKAIGFIDMMIDYSIANAPLQKELSADEVGNTAAFLASPLASAITGAVIYVDNGLNAMGVGIDSPLFKELNIPKSEE	-|92	-|6.4	-|21	-|6	-|2	-|2	-|1	-	---	-	-	-	-	-	---	-	-	-	-	-	---	-	-	-	-	-	---	-	-	-	-	gi|2204236|emb|CAA74176.1|	100	0	gi|2204236|emb|CAA74176.1|	enoyl-ACP reductase [Nicotiana tabacum]	76.03	3e-156	sp|Q9SLA8|FABI_ARATH	Enoyl-[acyl-carrier-protein] reductase [NADH], chloroplastic OS=Arabidopsis thaliana GN=MOD1 PE=1 SV=1	100	0	O04946	O04946_TOBAC Enoyl-ACP reductase (Precursor) OS=Nicotiana tabacum GN=enr-T2 PE=4 SV=1	CPn0406
195	gi|115463001|ref|NP_001055100.1|	Os05g0291700 [Oryza sativa Japonica Group] >gi|113578651|dbj|BAF17014.1| Os05g0291700 [Oryza sativa Japonica Group]	60982	MPPALTSNPPSFRPLSTPLTRRRAATTFLCRVGPGKPSKDTGADDEPKKRSFFADFGKLSDGRSLIPAFPPAAAGSLFAGGRGRKDPQTVFVAGATGQAGVRIAQTLLRQGFAVRAGVPDLASAQELARLASAYRLISPTEARRLNAVESDFEDPEAIAKSIGPATKVVVTVGAAEKGPDGGVVTTDEALRVVQAADLAGVTHVVVVYDLGAGDPSGESTYNVLDGFTSFFSNLFSRVQSLPLNEFLAKVVETDVRYTLIKTSLTDDYSPESTYGLVLAKEGASSTTSSTETGKVSKLQIAGLVADVFSNVAVAENKVVQVSTSSSVTSKTIEEAFSAIPEDSRRKEYQDAVAKAQAEEETRASQRTRQAEEDTTTVKAGGKKTPSDEAAASEAQASLE…	25|-	3.7|-	4|-	1|-	1|-	1|-	1|-	---	-	-	-	-	-	---	-	-	-	-	-	---	-	-	-	-	-	---	-	-	-	-	-	gi|115463001|ref|NP_001055100.1|	100	7e-168	gi|215766181|dbj|BAG98409.1|	unnamed protein product [Oryza sativa Japonica Group]	34.31	1e-10	sp|Q8SKU2|TIC62_PEA	Protein TIC 62, chloroplastic OS=Pisum sativum GN=TIC62 PE=1 SV=2	100	6e-166	B9FNP3	B9FNP3_ORYSJ Putative uncharacterized protein OS=Oryza sativa subsp. japonica GN=OsJ_17919 PE=4 SV=1	-
196	gi|77403667|dbj|BAE46412.1|	Pre-mRNA splicing factor [Solanum tuberosum]	81833	MDRQTPDYAAAMAFAQQQHQAANTQQQQQFGFHPQHQQFPPSIHGPPFLGPHSSLQQFPYPRPMQQPQLHPHTPPPHLLHLQQQQQPPPAFPPHMPPHLVSSPFFNPYDSPPPPSPPPSDPELQKRIDKLIEYAVKNGPEFEAMIREKQQDNPAYSFLFGGEGHYYYRYKLWMSTRPPGGAFNPPFPSSSLPMMHPPNPMMSPSPLTPYNASNASAAMLGPSHLHRPPFPPFYDQHHSQPFSRADYEHSYGPFKGLSRPLPSDVEMELSNVINNLTGTKESIKGAKSWFMQRSPFVPALAEALRDRVFSIDDSERQLHIVYLANDILFDSLQRRINPPELDNEALAFKPVLGPMLARIYHNPQNKEENQSRLQKILQFWGTKEVYDQDTIRALENEMIG…	-|28	-|1.8	-|1	-|1	-|1	-|1	-|1	-	---	-	-	-	-	-	---	-	-	-	-	-	---	-	-	-	-	-	---	-	-	-	-	gi|77403667|dbj|BAE46412.1|	100	0	gi|77403667|dbj|BAE46412.1|	Pre-mRNA splicing factor [Solanum tuberosum]	60	1e-10	sp|Q8CGZ0|CHERP_MOUSE	Calcium homeostasis endoplasmic reticulum protein OS=Mus musculus GN=Cherp PE=1 SV=1	100	0	Q3LHL4	Q3LHL4_SOLTU Pre-mRNA splicing factor OS=Solanum tuberosum GN=PPS2 PE=2 SV=1	-
197	gi|224083747|ref|XP_002307109.1|	predicted protein [Populus trichocarpa] >gi|222856558|gb|EEE94105.1| predicted protein [Populus trichocarpa]	51345	MQVDISLSPRVTAVKPSKTVAITDQATALAQAGVPVIRLAAGEPDFDTPAVIAEAGINAIREGHTRYTPNAGTQELRVAICQKLKEENGISYKPDQILVSNGAKQSIYQAILAVCSPGDEVIIPAPFWVSYPEMARLADATPVILPTSISENFLLDPKQLESKLNEKSRLLILCSPSNPTGSVYPKKLLEEIAKIVAKHPRLLVLSDEIYEHIIYAPATHTSFASLPGMWERTLTVNGFSKAFAMTGWRLGYLAGPKHFVAACNKIQSQFTSGASSISQKAGVAALGLGYAGGEAVSTMVTAFRERRDFLIKSFGEMEGVGLSEPLGAFYLFIDFSSYYGAEVEGFGKIDDSDALCRYLLDQAQVALVPGVAFGDDSCIRISYAASLTTLQAAVERIKK…	70|148	10.5|10.5	-|-	3|2	3|1	2|2	2|1	---	---	1	1	-	-	---	---	-	-	-	-	---	---	-	1	-	-	---	---	-	-	-	-	gi|224083747|ref|XP_002307109.1|	100	0	gi|224083747|ref|XP_002307109.1|	predicted protein [Populus trichocarpa] >gi|222856558|gb|EEE94105.1| predicted protein [Populus trichocarpa]	86.34	0	sp|E9L7A5|PAT_PETHY	Bifunctional aspartate aminotransferase and glutamate/aspartate-prephenate aminotransferase OS=Petunia hybrida PE=1 SV=1	100	0	B9H562	B9H562_POPTR Predicted protein OS=Populus trichocarpa GN=POPTRDRAFT_760138 PE=3 SV=1	DR0623
198	gi|168054092|ref|XP_001779467.1|	predicted protein [Physcomitrella patens subsp. patens] >gi|162669152|gb|EDQ55745.1| predicted protein [Physcomitrella patens subsp. patens]	53354	MSRVSANVTLGVASSKSRVVCEAEKTGEPPKKVDRWAGLGNDISDDQQDIQRGKGMVDALFQGAVGLGTQVVTMSSWDYVSTGQRTYNFDNMKDGLYIAPAFMDKLIIHIAKNFMNLPGIKVPLILGVWGGKGQGKSFQCELVMSKLGINPIVMSAGELESGNAGEPAKLIRQRYREAADVIKKGKMCALFINDLDAGAGRMGGTTQYTVNNQMVNATLMNIADSPTNVQLPGVYNKEEIPRVPIIVTGNDFSTLYAPLIRDGRMEKFYWAPTREDRIGVCKGIFRLDNVSDDNVTKLVDSFPGQSIDFFGALRARVYDDEVRKWISATGVDNIGKKLVNSKDGPPTFEKPAMTIEKLMEYGNMLVQEQQNVKRVQLADQYLSSAALGDANADAISQGT…	494|-	14.6|-	-|-	22|-	1|-	5|-	1|-	---	-	-	-	-	-	---	-	-	-	-	-	---	-	-	-	-	-	---	-	-	-	-	-	gi|168054092|ref|XP_001779467.1|	100	0	gi|168054092|ref|XP_001779467.1|	predicted protein [Physcomitrella patens subsp. patens] >gi|162669152|gb|EDQ55745.1| predicted protein [Physcomitrella patens subsp. patens]	80.53	0	sp|P93431|RCA_ORYSJ	Ribulose bisphosphate carboxylase/oxygenase activase, chloroplastic OS=Oryza sativa subsp. japonica GN=RCA PE=1 SV=2	100	0	A9TLG8	A9TLG8_PHYPA Predicted protein OS=Physcomitrella patens subsp. patens GN=PHYPADRAFT_147391 PE=4 SV=1	AF1297
199	gi|602586|emb|CAA58232.1|	1-amniocyclopropane-1-carboxylate oxidase [Nicotiana tabacum]	44924	MELLNTEQRAATMETIKDACENWGFFEVVNHGISHELLDTVEKLTKGHYKKCMEERFKEMVASKGLEAVQTEIKDLDWESTFFLKHLPISNISEVPDLEDEYRKIMKEFAEKLEKLAEQLLDLLCENLGLEQGYLKKAFYGSKGPTFGTKVSNYPPCPKPDLIKGLRAHTDAGGIILLFQDDKVSGLQLLKDDKWIDVPPMRHSIVINLGDQLEVITNGKYKSVEHRVIAQPDGNRMSIASFYNPGSDAVIYPAPELLEKENKVIYPKFVFEDYMKLYAGLKFQAKEPRFEAMKAVETTVNSAPIATV	-|73	-|11.4	-|3	-|5	-|2	-|3	-|2	-	---	-	1	-	-	-	---	-	1	-	-	-	---	-	1	-	-	-	---	-	1	-	-	gi|602586|emb|CAA58232.1|	100	1e-164	gi|602586|emb|CAA58232.1|	1-amniocyclopropane-1-carboxylate oxidase [Nicotiana tabacum]	84.89	4e-142	sp|P31237|ACCO_ACTDE	1-aminocyclopropane-1-carboxylate oxidase OS=Actinidia deliciosa GN=ACO PE=2 SV=1	100	2e-163	Q43590	Q43590_TOBAC 1-amniocyclopropane-1-carboxylate oxidase OS=Nicotiana tabacum PE=2 SV=1	PA4191
200	gi|225435731|ref|XP_002285703.1|	PREDICTED: uncharacterized protein LOC100263951 [Vitis vinifera]	30400	MRGRSYSPSPPRGYGRRGRSPSPRGRYGGRGSARDLPTSLLVRNLRHDCRGEDLRRPFGQFGPLKDIYLPRDYYTGEPRGFGFVQYVDPADAAEAKYQMDGQILHGRELTVVFAEENRKKPSDMRARERGRGRFYDRRRSPLRYSRSPPPRHARSPSRGRDYYSPSPKRRQYSRSVSPQDRRYSRDRSYTPDGRRRSYTRSPPYNGSRSRSQSPIRGESPSRLQSRSPDPEDYPREAVRDRSPSE	109|206	6.9|6.9	2|2	2|5	2|5	1|1	1|1	0.522	0.358	2	3	-	*	0.764	0.673	2	3	-	*	0.905	1.553	2	3	-	*	0.324	0.42	2	3	-	*	gi|225435731|ref|XP_002285703.1|	100	9e-90	gi|225435731|ref|XP_002285703.1|	PREDICTED: uncharacterized protein LOC100263951 [Vitis vinifera]	62.11	8e-47	sp|Q9SEU4|SR33_ARATH	Serine/arginine-rich splicing factor 33 OS=Arabidopsis thaliana GN=SR33 PE=1 SV=1	100	9e-89	F6GUK3	F6GUK3_VITVI Putative uncharacterized protein OS=Vitis vinifera GN=VIT_06s0004g00710 PE=4 SV=1	sll0517
201	gi|470144131|ref|XP_004307718.1|	PREDICTED: uroporphyrinogen decarboxylase, chloroplastic-like [Fragaria vesca subsp. vesca]	50206	MSCIHSYGSIACFSAPSSNSFTRRRSTLSPKPRILCALGGSVAEPQVTSVAEPLLLNAVRGEDVERPPVWLMRQAGRYMKSYMKLCEKHPSFRERSENVDLVVEISLQPWKVFQPDGVILFSDILTPLSGMNIPFDIVKGKGPVIFNPLSSAEHVNEVREFVPQESVPYVGEALTILREEVDNKAAVLGFVGAPFTLASYVVEGGSSKHFSKIKRLAFSQPKVLHALLQKFATSMTKYIQYQADSGAQAVQIFDSWATELSPVDFEEFSLPYLKQIVDEVKRTHPDLPLILYASGSGGLLERLALTGVDVVSLDWSVDMAEGRKRLGPNVAVQGNVDPGVLFGSKEFITSRIHDTVRKAGRGKHILNLGHGIVVGTPEENVAHFFEVAKDIRY	238|88	10.2|10.2	-|-	5|2	5|2	2|2	2|2	0.81	---	3	1	-	-	---	---	1	1	-	-	1.162	---	4	1	-	-	---	---	1	1	-	-	gi|470144131|ref|XP_004307718.1|	100	0	gi|470144131|ref|XP_004307718.1|	PREDICTED: uroporphyrinogen decarboxylase, chloroplastic-like [Fragaria vesca subsp. vesca]	85.45	6e-167	sp|Q42855|DCUP_HORVU	Uroporphyrinogen decarboxylase (Fragment) OS=Hordeum vulgare GN=DCUP PE=2 SV=1	91.82	6e-81	A9PGQ3	A9PGQ3_POPTR Putative uncharacterized protein OS=Populus trichocarpa PE=2 SV=1	slr0536
202	gi|1321627|dbj|BAA12029.1|	thylakoid-bound ascorbate peroxidase [Cucurbita cv. Kurokawa Amakuri]	55741	MAATALGSVAASSASSTTRFLSTATRATLPFSSRSSSLSSFKFLRSAPLISHLFLNQGRPSSCVSIRRFNAASHPKCLASDPEQLKSAREDIKELLKTTFCHPILVRLGWHDAGTYNKNIEEWPQRGGANGSLRFDVELGHGANAGLVNALKLIEPIKKKYSNVTYADLFQLASATAIEEAGGPKIPMKYGRVDVVGPEQCPEEGRLPDAGPPSPAAHLREVFYRMGLNDREIVALSGAHTLGRSRPERSGWGKPETKYTKDGPGAPGGQSWTVQWLKFNNSYFKDIKERRDEELLVLPTDAALFEDPSFKVYAEKYVEDQEAFFKDYAEAHAKLSNLGAKFDPPEGIVIDDASSKPAGEKFDAAKYSYGKRELSDSMKQKIRAEYESFGGSPDKPLPT…	-|189	-|13.1	-|1	-|6	-|1	-|3	-|1	-	---	-	-	-	-	-	---	-	1	-	-	-	---	-	-	-	-	-	---	-	1	-	-	gi|1321627|dbj|BAA12029.1|	100	0	gi|1321627|dbj|BAA12029.1|	thylakoid-bound ascorbate peroxidase [Cucurbita cv. Kurokawa Amakuri]	84.7	3e-138	sp|Q7XJ02|APX7_ORYSJ	Probable L-ascorbate peroxidase 7, chloroplastic OS=Oryza sativa subsp. japonica GN=APX7 PE=2 SV=1	100	0	Q4JRC4	Q4JRC4_9ROSI Stromal ascorbate peroxidase (Precursor) OS=Cucurbita cv. Kurokawa Amakuri PE=2 SV=1	YKR066c
203	gi|325181697|emb|CCA16151.1|	AlNc14C19G1933 [Albugo laibachii Nc14]	85051	MVETTVSGLSVGIDLGTTYSCVGVWQNDRVEIIANDQGNRTTPSYVAFTGNERLIGEAAKNQVAMNAENTVFDAKRLIGRKFHDQTVQQDTKHWPFSVVCGPEDKPQIVVEVNGAKKMFYAEEISAMVLSKMREIAEAYLGRQVKNAVVTVPAYFNDSQRQATKDAGVIAGINVLRILNEPTAAAIAYGLDKKGGEHNVLIFDLGGGTFDVSLLTIEEGVFEVRATAGDTHLGGEDFDNRLVEHFLTEFKRKYRKDLSQNQRALRRLRSACERAKRTLSSSAQAYIEIDSLHEGVDFNSTITRARFEDLCSDYFRKTMDPVERVLRDAKLSKNQLNEIVLVGGSTRIPKVQQLLSDFFNGKELYKSINPDEAVAYGATVQAAILSGASDQSERLQNVVL…	-|300	-|9.8	-|-	-|13	-|8	-|5	-|3	-	1.676	-	4	-	-	-	0.854	-	3	-	-	-	0.924	-	4	-	-	-	1.476	-	3	-	*	gi|325181697|emb|CCA16151.1|	100	0	gi|325181697|emb|CCA16151.1|	AlNc14C19G1933 [Albugo laibachii Nc14]	75.86	0	sp|P16394|HSP70_BRELC	Heat shock 70 kDa protein OS=Bremia lactucae GN=HSP70 PE=3 SV=1	100	0	F0W4W2	F0W4W2_9STRA AlNc14C19G1933 protein OS=Albugo laibachii Nc14 GN=AlNc14C19G1933 PE=3 SV=1	YBL075c
204	gi|2501647|sp|Q42967.1|DCUP_TOBAC	RecName: Full=Uroporphyrinogen decarboxylase, chloroplastic; Short=UPD; Short=URO-D; Flags: Precursor >gi|1009429|emb|CAA58040.1| uroporphyrinogen decarboxylase [Nicotiana tabacum]	51530	MMSCNYSFSSISPSSKSAFTSPSNFNLNPRLICCSAGGTVAEPKAINATQPLLLDAVRGKEVERPPVWLMRQAGRYMKSYQLLCEKYPLFRDRSENVDLVVEISLQPWKVFRPDGVILFSDILTPLSGMNIPFDIIKGKGPVIFDPLRTAADVEKVREFIPEKSVPYVGEALTILRKEVNNQAAVLGFVGAPFTLASYVVEGGSSKNFTKIKRLAFAEPKVLHALLQKFATSMAKYIRYQADSGAQAVQIFDSWATELSPVDFEEFSLPYLKQIVDSVKLTHPNLPLILYASGSGGLLERLPLTGVDVVSLDWTVDMADGRRRLGPNVAIQGNVDPGVLFGSKEFITNRINDTVKKAGKGKHILNLGHGIKVGTPEENFAHFFEIAKGLRY	21|-	2.8|-	2|-	1|-	1|-	1|-	1|-	---	-	-	-	-	-	---	-	-	-	-	-	---	-	-	-	-	-	---	-	-	-	-	-	gi|2501647|sp|Q42967.1|DCUP_TOBAC	100	0	gi|2501647|sp|Q42967.1|DCUP_TOBAC	RecName: Full=Uroporphyrinogen decarboxylase, chloroplastic; Short=UPD; Short=URO-D; Flags: Precursor >gi|1009429|emb|CAA58040.1| uroporphyrinogen decarboxylase [Nicotiana tabacum]	100	0	sp|Q42967|DCUP_TOBAC	Uroporphyrinogen decarboxylase, chloroplastic OS=Nicotiana tabacum GN=DCUP PE=1 SV=1	89.31	2e-79	A9PGQ3	A9PGQ3_POPTR Putative uncharacterized protein OS=Populus trichocarpa PE=2 SV=1	slr0536
205	gi|308807138|ref|XP_003080880.1|	squalene monooxygenase (ISS) [Ostreococcus tauri] >gi|116059341|emb|CAL55048.1| squalene monooxygenase (ISS), partial [Ostreococcus tauri]	63034	XXVTDDVAWDVVIVGAGVAGASLAHGLGVEGRRVLVIERDMSTPDRIVGELLQPGGYVKLKELGLASCVEGIDAQKVYGYTMFKNGEVATMTYPLEGRTDDVAGRSFHNGRFVQKLREKAMEVEGVTIIQGTVKKLLNDRGEEWSGEDGQRVAGVSYTVGGETWDKEKNALVRDASTMQTHAVYAPLTVVCDGHFSSLRTKLSPKSTPNHPSHFVGVILKGAPNDLLPNGHHGHVVLGDPSPVLFYPISSTEVRCLVDIPASVKMPSVAKGEMAKYVLEKIVPQVPEKLRPHLVKAVEEGRFRSMPNKTMAAKPSRTPGAVLLGDAFNMRHPLTGGGMTVALNDISTFKSMLSPLPNFSDSKATAAKLDEFYRHRTRPALTINTLANALYAVFCSDGDS…	24|-	3.0|-	-|-	1|-	1|-	1|-	1|-	---	-	-	-	-	-	---	-	-	-	-	-	---	-	-	-	-	-	---	-	-	-	-	-	gi|308807138|ref|XP_003080880.1|	100	0	gi|308807138|ref|XP_003080880.1|	squalene monooxygenase (ISS) [Ostreococcus tauri] >gi|116059341|emb|CAL55048.1| squalene monooxygenase (ISS), partial [Ostreococcus tauri]	52.47	2e-133	sp|O48651|ERG1_PANGI	Squalene monooxygenase OS=Panax ginseng PE=2 SV=1	100	0	Q012Y2	Q012Y2_OSTTA Squalene monooxygenase (ISS) (Fragment) OS=Ostreococcus tauri GN=Ot08g03100 PE=4 SV=1	SPBC713.12
206	gi|5764653|gb|AAD51361.1|AF176669_1	NADP-isocitrate dehydrogenase [Citrus limon]	58078	MAFQKIKVANPIVEMDGDEMTRVFWKSIKDKLIFPFLELDIKYFDLGLPNRDATDDKVTVESAEATLKYNVAIKCATITPDEARVKEFVLKQMWKSPNGTIRNILNGTVFREPIICKNVPRLIPGWTKPICIGRHAFGDQYRATDTVIQGPGKLKLVFVPEGKDEKTELEVYNFTGEGGVALSMYNTDESIRSFAEASMNTAYQKKWPLYLSTKNTILKNYDGKFKDIFQEVYEANWKSKFEAAGIWYEHRLIDDMVAYALKSEGGYVWACKDYDGNVQSDFLAQGFGSLGLMTSVLVCPDGKTIEAEAAHGTVTRHYRVHQKGGETSTNSIASIFAWSRGLAHRAKLDNNARLLDFTEKLEAACVGTVESGKMTKDLALIIHGSKMTREHYLNTEEFI…	57|110	6.3|13.0	9|1	2|4	2|2	2|4	2|2	---	0.724	1	2	-	-	---	0.516	-	2	-	*	---	1.108	1	2	-	-	---	0.394	-	2	-	-	gi|5764653|gb|AAD51361.1|AF176669_1	100	0	gi|5764653|gb|AAD51361.1|AF176669_1	NADP-isocitrate dehydrogenase [Citrus limon]	91.22	0	sp|P50218|IDHC_TOBAC	Isocitrate dehydrogenase [NADP] OS=Nicotiana tabacum PE=2 SV=1	100	0	Q9SW73	Q9SW73_CITLI Isocitrate dehydrogenase [NADP] OS=Citrus limon PE=2 SV=1	BMEI0791
207	gi|460405892|ref|XP_004248408.1|	PREDICTED: uncharacterized protein LOC101259586 isoform 1 [Solanum lycopersicum]	34025	MALQLPFPLISSSLSSSLPLLTSSNCKICSISISPFTHKRLLSHSNLQNFGFSSRGRSNSLFVSQEDTQLTNEEESSISTATQQDDDDPDPESLEYVSQIKRVLELLKRNRDMLFGEVKLTIMIEDPRDIERKRLLGIDDENAPTRDDLAACLEEINEGEVPKDRVALQMLAEEMNSWPNLEVEALKQNKSRSLYAKATDTGIDPKEAAKRLKIDWDSAAEIEEAADSDEPDVPPILGYGALYLVSALPIIIGISVVLILFYNSLQ	53|33	4.5|4.5	1|1	3|1	3|1	1|1	1|1	---	---	-	-	-	-	---	---	-	-	-	-	---	---	-	-	-	-	---	---	-	-	-	-	gi|460405892|ref|XP_004248408.1|	100	1e-96	gi|460405894|ref|XP_004248409.1|	PREDICTED: uncharacterized protein LOC101259586 isoform 2 [Solanum lycopersicum]	-	-	-	-	91.3	1e-29	E5KCJ9	E5KCJ9_TOBAC Y3IP1 (Fragment) OS=Nicotiana tabacum PE=2 SV=1	-
208	gi|307931134|dbj|BAJ21428.1|	photosystem II CP43 apoprotein [Picocystis salinarum]	43541	GNARLINLSGKLLGAHVAHAGLIVFWAGAMNLFEVAHFVPEKPMYEQGLILLPHLATLGYGVGPGGEVIDTFPYFVSGVLHLISSAVLGFGGVYHSLIGPETLEESFPFFGYVWKDKNKMTTILGIHLIILGLGAWLLVWKAMYFGGVYDTWAPGGGDVRIISNPTLSPAVIFGYLLKSPFGGDGWIVSVDNMEDIIGGHIWIGTSLIFGGIWHILTKPWAWVRRAFVWSGEAYLSYSLASVSLMAFVATCFSWFNTTAYPSEFYGPTGPEASQAQAFTFLVRDQRLGANVGSSQGPTGLGKYLMRSPTGEIIFGGETMRFWDFRGPWLEPLRGPNGLDLNKLKNDIQPWQERRSAEYMTHAP	-|33	-|4.4	-|-	-|2	-|2	-|1	-|1	-	---	-	-	-	-	-	---	-	-	-	-	-	---	-	-	-	-	-	---	-	-	-	-	gi|307931134|dbj|BAJ21428.1|	100	0	gi|307931134|dbj|BAJ21428.1|	photosystem II CP43 apoprotein [Picocystis salinarum]	92.84	0	sp|P56308|PSBC_CHLVU	Photosystem II CP43 chlorophyll apoprotein OS=Chlorella vulgaris GN=psbC PE=3 SV=1	100	0	E1CIG8	E1CIG8_9CHLO Photosystem II CP43 chlorophyll apoprotein (Fragment) OS=Picocystis salinarum GN=psbC PE=3 SV=1	-
209	gi|5262775|emb|CAB45880.1|	putative protein [Arabidopsis thaliana] >gi|7268881|emb|CAB79085.1| putative protein [Arabidopsis thaliana]	186134	MDLSLQLQIHGALINKGPSCTSYWASSSSLSLPRDFISSSTFLLHRRLRRRSCSRSRGIRLRRSGFSAMPCSSSDTLTASRVGCGGGGGGGAVGGGAENASVANFKLNESTFIASLMPKKEIRADCFIEAHPEYDGRGVVIAIFDSGFDPSAAGLHVTSDGKPKVLDVIDCTGSGDIDTSTVVKANEDGHIRGASGATLVVNSSWKNPTGEWRVGSKLVYQLFTDDLTSRVKVAIRVVTFLAKERRKSWDEKNQEEIAKAVNNLYDFDQKHSKVEDAKLKKTREDLQSKVDFLKKQADKYEDKGPVIDAVVWHDGEVWRVALDTQSLEEDPDSGKLADFSPLTNYRQGKVLSIVTDSSPHGTHVAGIATAHHPEHLLNGVAPGAQIISCKIGDSRLGSM…	-|66	-|0.9	-|2	-|2	-|2	-|1	-|1	-	1.247	-	2	-	-	-	---	-	1	-	-	-	1.42	-	2	-	-	-	---	-	1	-	-	gi|5262775|emb|CAB45880.1|	100	0	gi|5262775|emb|CAB45880.1|	putative protein [Arabidopsis thaliana] >gi|7268881|emb|CAB79085.1| putative protein [Arabidopsis thaliana]	36.47	0	sp|P29144|TPP2_HUMAN	Tripeptidyl-peptidase 2 OS=Homo sapiens GN=TPP2 PE=1 SV=4	100	0	Q9SUC7	Q9SUC7_ARATH Putative uncharacterized protein AT4g20850 OS=Arabidopsis thaliana GN=T13K14.10 PE=4 SV=1	SPAP8A3.12c
210	gi|158935083|emb|CAM57109.1|	Rieske iron-sulphur protein precursor [Zantedeschia aethiopica]	28842	MAATALSTAVAASQLCSSKNGPCSPLRGLLFRGLGLQGGERRGGMGLQGRERRGGKVTCMASSIPADRVPDMGKRQLMNLLLLGALSLPTAIMVVPYAPFFVPPSSGGDGGGTVAKDALGNDVIAVEWLKTHGPGDRTLTQGLKGDPTYLVVENDRTLATYGINAVCTHLGCVVPWNKAENKFLCPCHGSQYNNQGKVVRGPAPLSLALAHADLDDGKVVFVPWVETDFRTGEDPWWA	391|-	17.6|-	-|-	17|-	1|-	3|-	1|-	---	-	1	-	-	-	---	-	1	-	-	-	---	-	1	-	-	-	---	-	1	-	-	-	gi|158935083|emb|CAM57109.1|	100	2e-88	gi|158935083|emb|CAM57109.1|	Rieske iron-sulphur protein precursor [Zantedeschia aethiopica]	88.04	2e-71	sp|P30361|UCRIA_TOBAC	Cytochrome b6-f complex iron-sulfur subunit 1, chloroplastic OS=Nicotiana tabacum GN=petC1 PE=2 SV=2	100	2e-87	A8Y801	A8Y801_ZANAE Cytochrome b6-f complex iron-sulfur subunit (Precursor) OS=Zantedeschia aethiopica GN=petC PE=2 SV=1	sll1316
211	gi|5360953|emb|CAB46439.1|	v-ATPase subunit D [Arabidopsis thaliana]	37021	MAGQNARLNVVPTVTMLGVMKARLVGATRGHALLKKKSDALTVQFRALLKKIVTAKESMGEMMKTSSFALTEVKYVAGDNVKHVVLENVKEATLKVRSRTENIAGVKLPKFDHFSEGETKNDLTGLARGGQQVRACRVAYVKAIEVLVELASLQTSFLTLDEAIKTTNRRVNALENVVKPKLENTISYIKGELDELEREDFFRLKKIQGYKRREVERQAANAKEFAEEMVLEDISMQRGISINAARNFLVGGAEKDSDIIF	44|67	5.4|5.4	10|10	1|2	1|2	1|1	1|1	---	---	1	1	-	-	---	---	1	-	-	-	---	---	1	1	-	-	---	---	1	-	-	-	gi|5360953|emb|CAB46439.1|	100	1e-148	gi|5360953|emb|CAB46439.1|	v-ATPase subunit D [Arabidopsis thaliana]	99.62	1e-148	sp|Q9XGM1|VATD_ARATH	V-type proton ATPase subunit D OS=Arabidopsis thaliana GN=VHA-D PE=1 SV=2	99.62	3e-147	Q0WWD3	Q0WWD3_ARATH Vacuolar-type H+-ATPase (V-ATPase) subunit D OS=Arabidopsis thaliana GN=At3g58730 PE=2 SV=1	YEL051w
212	gi|111379986|gb|ABH09468.1|	germin-like protein 2 [Vitis vinifera]	27699	MAAVVALFVITLAVFSGTVAADPDMLQDVCVADLTSGVKVNGFSCKDATNITATDFFFDGLAKPGLTNNSMGSLVTGANVQKIPGLNTLGVSLSRIDYAPGGLNPPHTHPRATEMVFVLEGELDVGFITTSNTLISKSIKKGEIFVFPKGLVHFQKNNGEVPAAVISAFNSQLPGTQSIAVSLFAASPPVPNNVLTKAFQVGTKEVEKIKSRLAPKK	109|100	6.0|6.0	12|12	4|4	4|4	1|1	1|1	1.54	1.805	3	2	-	-	1.133	1.277	3	2	-	-	1.253	0.875	3	2	-	-	1.39	1.917	3	2	-	*	gi|111379986|gb|ABH09468.1|	100	5e-121	gi|111379986|gb|ABH09468.1|	germin-like protein 2 [Vitis vinifera]	77.5	1e-88	sp|Q6I544|GL52_ORYSJ	Germin-like protein 5-1 OS=Oryza sativa subsp. japonica GN=Os05g0277500 PE=2 SV=1	100	5e-120	Q0MYQ7	Q0MYQ7_VITVI Germin-like protein 2 OS=Vitis vinifera GN=VIT_14s0060g00120 PE=2 SV=1	sll1358
213	gi|195609902|gb|ACG26781.1|	hypothetical protein [Zea mays]	34380	MELCLAARAGTTAAACRRRAPTTTGVPKKKRHGGGTVRVRCAATAPMGEKTEYRDGPLERAFMGLFARKMEKYAAKKPAAQAKEERAVWEWDYESFVDVSRRVMLGRTRAQQQQAVREVLLSMLPPGAPAQFRRLFPPTRWACEFNAALTVPFFRWLVGPSEVVEVEVGGVRQRSGVRIEKCRYLESSGCVGMCVNMCKVPTQDFFTNEFGLPLTMNPNFEDMSCEMIYGQVPPPLEEDPASKQACYPSLCSMSTPSAPACPKLQ	30|53	6.0|6.0	10|10	1|2	1|2	1|1	1|1	---	---	-	-	-	-	---	---	-	-	-	-	---	---	-	-	-	-	---	---	-	-	-	-	gi|195609902|gb|ACG26781.1|	100	2e-113	gi|195609902|gb|ACG26781.1|	hypothetical protein [Zea mays]	-	-	-	-	100	2e-112	B6SPJ8	B6SPJ8_MAIZE Putative uncharacterized protein OS=Zea mays PE=2 SV=1	-
214	gi|257075195|dbj|BAI22843.1|	argininosuccinate synthetase [Gentiana triflora]	33497	TSVIVPWLRENYGCEVVCFTADVGQGIQELDGLEDKAKASGACQLVVKDLKEEFVKDYIFPCLRAGAIYERKYLLGTSMARPVIAKAMVEVAKEVGADAVSHGCTGKGNDQVRFELTFFALDPKLSVVAPWREWDITGREDAIEYAKRHNVPVPVTKKSIYSRDRNLWHLSHEGDILEDPAIEPNKDMYLMSVDPEDAPNEPEYVKVGIVAGLPVSVNGKELSPASLLAELNEIGGKHGIGRVDMVENRLVG	-|135	-|6.7	-|-	-|3	-|3	-|1	-|1	-	0.843	-	3	-	-	-	---	-	-	-	-	-	1.342	-	3	-	-	-	---	-	-	-	-	gi|257075195|dbj|BAI22843.1|	100	1e-145	gi|257075195|dbj|BAI22843.1|	argininosuccinate synthetase [Gentiana triflora]	86.51	5e-133	sp|Q9SZX3|ASSY_ARATH	Argininosuccinate synthase, chloroplastic OS=Arabidopsis thaliana GN=At4g24830 PE=2 SV=3	100	1e-144	C7G0W8	C7G0W8_GENTR Argininosuccinate synthetase (Fragment) OS=Gentiana triflora GN=ASS PE=2 SV=1	VC2642
215	gi|307109997|gb|EFN58234.1|	hypothetical protein CHLNCDRAFT_50640 [Chlorella variabilis]	130998	MATPGACASSSAATSWQVQLGFRGLKTLDLRQEQECIVINIFTSISMLIKRKRRSTGNCSPATPPREWPDGDCFRCGAAHQPPAAAMTFPADLMLRGGTAVCRSVLGQTSLDIELAAASPAPAAAAAAAAVREAVRLYLVLDNSGSMAGSPLDTAKRAVIRFAQAAPAAAGVMEACWLVEFNTSTRAHSLLGLGGAQIEEAVGTIPAGGSTCFHRALSTLADLAAPSAPLGATAAAAAAAAVAAARHFVVFFSDGCDSGYGGVEAALESLQARLGGGSGGGSGGGGGTGAEWCVHTLGFGRDHDAAFLSSLTLAGSAPGSFQYIQSMAEQMGPFPGSCAGARLFCAAVPLEGPVEVEAAARAASSRLGLRLEVPEAGGQAVQLALTWRKAPLGELAGEA…	22|-	1.9|-	-|-	2|-	2|-	1|-	1|-	---	-	-	-	-	-	---	-	-	-	-	-	---	-	-	-	-	-	---	-	-	-	-	-	gi|307109997|gb|EFN58234.1|	100	0	gi|307109997|gb|EFN58234.1|	hypothetical protein CHLNCDRAFT_50640 [Chlorella variabilis]	-	-	-	-	100	0	E1Z7U6	E1Z7U6_CHLVA Putative uncharacterized protein OS=Chlorella variabilis GN=CHLNCDRAFT_50640 PE=4 SV=1	-
216	gi|329025164|gb|AEB71565.1|	MAF1 [Solanum chacoense]	18316	MAEIDSAQSQETVSQETQNKPMTTSFSIWPPTQRTRDAVINRLIESLSTPSILSKRYGTLPQDEASETARLIEEEAFAAAGSTATDADDGIEILQVYSKEISKRMIDTVKSRSAPAAASESESKPSELPADASEPSSASGLTGDVSSVETEP	29|-	8.6|-	1|-	1|-	1|-	1|-	1|-	---	-	-	-	-	-	---	-	-	-	-	-	---	-	-	-	-	-	---	-	-	-	-	-	gi|329025164|gb|AEB71565.1|	100	1e-56	gi|329025164|gb|AEB71565.1|	MAF1 [Solanum chacoense]	97.37	4e-56	sp|Q9M7N6|MAF1_SOLLC	MFP1 attachment factor 1 OS=Solanum lycopersicum GN=MAF1 PE=1 SV=1	100	1e-55	F5C0G6	F5C0G6_SOLCH MAF1 OS=Solanum chacoense GN=MAF1 PE=2 SV=1	-
217	gi|147784965|emb|CAN64129.1|	hypothetical protein VITISV_039161 [Vitis vinifera]	48355	MANPSLILLSSFLFCLLLSSASAQLRQDFYKDTCPNVESLVRSAVQKKFLQTFVTAPATLRLFFHDCFVRGCDASVMLASPNGRAEKDHGDDISLAGDGFDTVIKAKAAVDSDPKCTNKVSCADILALATRDVVALVHHLLSFISIESLIMLKAHNMVTTTIILSSPFVNDYYFYKLILVHFTLGSSLKAGGPSYKVELGRRDGRISTKASVQHKLPHPDFSLDQLNTMFSSHGLTQKDMIALSGAHTIGFSHCSRFFKRIYRFSNQNRIDPTLNATYALQLRQMCPTRVDPRVAINMDPTTPQTFDNAYFQNLQKGMGLFTSDQALFTDTRSRPTVNQFAASNAAFGRAFVSAITKLGRVGVKTGNQGEIRHDCTSVN	31|-	4.5|-	1|-	1|-	1|-	1|-	1|-	---	-	-	-	-	-	---	-	-	-	-	-	---	-	-	-	-	-	---	-	-	-	-	-	gi|147784965|emb|CAN64129.1|	100	0	gi|147784965|emb|CAN64129.1|	hypothetical protein VITISV_039161 [Vitis vinifera]	65.06	3e-128	sp|Q96518|PER16_ARATH	Peroxidase 16 OS=Arabidopsis thaliana GN=PER16 PE=1 SV=2	100	0	A5C285	A5C285_VITVI Putative uncharacterized protein OS=Vitis vinifera GN=VITISV_039161 PE=3 SV=1	-
218	gi|327493259|gb|AEA86336.1|	putative DNA repair protein [Solanum nigrum]	19216	VARGGVNSAAGTTAPPTAPSSGTPNSAPLNLFPQENVAGAGGAGLGSLDFLMNNQQFQALRSMVQANPQILRPMLQELGKQNPQLLRSIQEHDQEFLQLINEPVDGSDGDMFDLADQEIPHTVSVTPEEQEVIERLEAMGFDRALVIEAFLACDRNEELAANYLLEQAGDYE	46|43	11.0|11.0	-|-	1|1	1|1	1|1	1|1	---	---	1	1	-	-	---	---	-	1	-	-	---	---	1	1	-	-	---	---	-	1	-	-	gi|327493259|gb|AEA86336.1|	100	5e-73	gi|327493259|gb|AEA86336.1|	putative DNA repair protein [Solanum nigrum]	74.66	8e-55	sp|Q84L33|RD23A_ARATH	Putative DNA repair protein RAD23-1 OS=Arabidopsis thaliana GN=RAD23-1 PE=2 SV=3	100	4e-72	F4YBD9	F4YBD9_SOLNI Putative DNA repair protein (Fragment) OS=Solanum nigrum GN=RAD2 PE=2 SV=1	SPBC2D10.12
219	gi|232244|sp|P30124.1|HEM2_PEA	RecName: Full=Delta-aminolevulinic acid dehydratase, chloroplastic; Short=ALADH; AltName: Full=Porphobilinogen synthase; Flags: Precursor >gi|169031|gb|AAA33640.1| aminolevulinic acid dehydratase, partial [Pisum sativum]	49491	HTFVDLKSPFTLSNYLSFSSSKRRQPPSLFTVRASDSDFEAAVVAGKVPEAPPVPPTPASPAGTPVVPSLPIQRRPRRNRRSPALRSAFQETTLSPANFVYPLFIHEGEEDTPIGAMPGCYRLGWRHGLLEEVAKARDVGVNSVVLFPKIPDALKTPTGDEAYNEDGLVPRSIRLLKDKYPDLIIYTDVALDPYSSDGHDGIVREDGVIMNDETVHQLCKQAVAQARAGADVVSPSDMMDGRVGAMRVALDAEGFQHVSIMSYTAKYASSFYGPFREALDSNPRFGDKKTYQMNPANYREALTEMREDESEGADILLVKPGLPYLDIIRLLRDNSPLPIAAYQVSGEYSMIKAGGALKMIDEEKVMMESLLCLRRAGADIILTYFALQAARTLCGEKR	-|38	-|5.0	-|5	-|1	-|1	-|1	-|1	-	---	-	-	-	-	-	---	-	-	-	-	-	---	-	-	-	-	-	---	-	-	-	-	gi|232244|sp|P30124.1|HEM2_PEA	100	0	gi|232244|sp|P30124.1|HEM2_PEA	RecName: Full=Delta-aminolevulinic acid dehydratase, chloroplastic; Short=ALADH; AltName: Full=Porphobilinogen synthase; Flags: Precursor >gi|169031|gb|AAA33640.1| aminolevulinic acid dehydratase, partial [Pisum sativum]	100	0	sp|P30124|HEM2_PEA	Delta-aminolevulinic acid dehydratase, chloroplastic (Fragment) OS=Pisum sativum GN=HEMB PE=1 SV=1	95.65	1e-84	C6T8U2	C6T8U2_SOYBN Delta-aminolevulinic acid dehydratase OS=Glycine max PE=2 SV=1	all4725
220	gi|1345550|emb|CAA44292.1|	23-kDa ploypeptide of photosystem II oxygen-evolving complex [Nicotiana tabacum]	34615	STQCFLHQHALSSSAARTTSSVSSQRYVSSLKPNQLVCRAQKQSSAQEDDGNSVAVSRRLALTVLIGAAAVGSKVSPADAAYGEAANVFGKPKQNTDFLAYNGDGFKLQVPAKWNPSKEVEFPGQVLRYEDNFDSTSNLIVTVTPTDKKSITGYGSPEEFLSQVDFLLGKQAYFGKTDSEGGFESGAVATANLLEASNTTVGGKEYYILSVLTRTADGDEGGKHQLISATVNDGKLYICKAQAGDKRWFKGARKFVENAATSFSVA	351|-	28.2|-	2|-	28|-	18|-	6|-	4|-	1.35	-	4	-	-	-	3.509	-	4	-	*	-	0.849	-	4	-	-	-	4.559	-	5	-	-	-	gi|1345550|emb|CAA44292.1|	100	3e-141	gi|1345550|emb|CAA44292.1|	23-kDa ploypeptide of photosystem II oxygen-evolving complex [Nicotiana tabacum]	96.24	2e-136	sp|Q7DM39|PSBP1_TOBAC	Oxygen-evolving enhancer protein 2-1, chloroplastic OS=Nicotiana tabacum GN=PSBP1 PE=3 SV=2	100	3e-140	Q04126	Q04126_TOBAC 23-kDa ploypeptide of photosystem II oxygen-evolving complex (Precursor) OS=Nicotiana tabacum GN=oee2-B PE=2 SV=1	-
221	gi|460382303|ref|XP_004236879.1|	PREDICTED: alpha-galactosidase-like isoform 1 [Solanum lycopersicum]	56613	MELRLGIKLILALCLLISAEYGGYSHRTTAEMRWPERKQRKVKEDLFVKRRSLLNNGLGSTPPMGWSSWNHFACNIDEKVIRETADALVSTGLDKLGYKYVNIDDCWAEPQRDDQGNFAAKNSTFPSGMKALADYVHSKGLKLGIYSDAGYYTCSKKMPGSLGHEEQDATTFAAWGIDYLKYDNCNHDGTKPTVRYPVMTRALMKVGRPIFFNLCEWGDLHPALWGGKLGNSWRTTNDISDTWESMISRADQNEVYADYARPGGWNDPDMLEVGNGGMTKDEYIIHFSIWAISKAPLIIGCDVRNLSHDTMEILANKEVIAVDQDELGVQGKKIADDNLCTFYYEQIWAGPLSGYRVALVLLNRGPQRYEITANWDDIGIPPNSVVIARDLWEHKTLET…	-|45	-|3.5	-|2	-|1	-|1	-|1	-|1	-	---	-	1	-	-	-	---	-	-	-	-	-	---	-	-	-	-	-	---	-	-	-	-	gi|460382303|ref|XP_004236879.1|	100	0	gi|460382303|ref|XP_004236879.1|	PREDICTED: alpha-galactosidase-like isoform 1 [Solanum lycopersicum]	65.86	3e-147	sp|Q42656|AGAL_COFAR	Alpha-galactosidase OS=Coffea arabica PE=1 SV=1	79.95	3e-180	B9RGK6	B9RGK6_RICCO Alpha-galactosidase/alpha-n-acetylgalactosaminidase, putative OS=Ricinus communis GN=RCOM_1454590 PE=4 SV=1	-
222	gi|224099437|ref|XP_002311483.1|	predicted protein [Populus trichocarpa] >gi|222851303|gb|EEE88850.1| predicted protein [Populus trichocarpa]	68565	MASRRLLSSLLRSTSRRSLSKSTLSNSHPKLSTSSTRRASPYGYLLNRAAEYATSAAAASPSSQPPPAKSEGTKGKIIDEFTGKGSIGHVCQVIGAVVDVKFDEGLPPILTALEVQGHSIRLVLEVAQHLGESVVRTIAMDGTEGLIRGQPVLNTGSPITVPVGRATLGRIINVIGEAIDEKGDLKTEHYLPIHREAPAFVEQATEQQILVTGIKVVDLLAPYQRGGKIGLFGGAGVGKTVLIMELINNVAKAHGGFSVFAGVGERTREGNDLYREMIESGVIKLGDQQSESKCALVYGQMNEPPGARARVGLTGLTVAEHFRDAEGQDVLLFIDNIFRFTQANSEVSALLGRIPSAVGYQPTLATDLGGLQERITTTKKGSITSVQAIYVPADDLTDP…	1512|1379	29.9|29.3	-|-	60|56	1|2	11|11	1|1	---	0.706	1	2	-	-	---	---	1	1	-	-	---	1.303	1	2	-	*	---	---	1	1	-	-	gi|224099437|ref|XP_002311483.1|	100	0	gi|224099437|ref|XP_002311483.1|	predicted protein [Populus trichocarpa] >gi|222851303|gb|EEE88850.1| predicted protein [Populus trichocarpa]	92.44	0	sp|P19023|ATPBM_MAIZE	ATP synthase subunit beta, mitochondrial OS=Zea mays GN=ATPB PE=2 SV=1	100	0	B9HJ80	B9HJ80_POPTR ATP synthase subunit beta OS=Populus trichocarpa GN=POPTRDRAFT_720428 PE=3 SV=1	SPAC222.12c
223	gi|296083662|emb|CBI23651.3|	unnamed protein product [Vitis vinifera]	55927	MVSIATIPAFPCNNTRSFPRHFLTRRSFSRHILTRRSTPPSFSAGTWRSTAITSKLKEKTALEYRKLGDSDLNISEITLGTMTFGEQNTENEAHEILSYAFEHGINALDTAEAYPIPMKKETQGKTDLYIASWLKSQPRDKVILATKVCGYSERSSYLRDNAKVLRVDAANIRESVEKSLKRLNTDYIDLLQIHWPDRYVALFGEFSYDPSKWRPSIPFVEQLKAFQELIDEGKVRYIGVSNETSYGVMEFVHAAKVEGLPKIVSIQNSYSLLVRCRFEIDLVEVCHPNNYNIGLLAYSPLGGGSLSGKYLDINSEAAKRGRLNLFPGYMERYNRSIAKEATIEYTKVAKKHGLTLVQLALGFARDRPFMASSIVGATSVDQLKEDIDAFVTTERPLPA…	-|26	-|3.8	-|4	-|1	-|1	-|1	-|1	-	---	-	-	-	-	-	---	-	-	-	-	-	---	-	-	-	-	-	---	-	-	-	-	gi|296083662|emb|CBI23651.3|	100	0	gi|296083662|emb|CBI23651.3|	unnamed protein product [Vitis vinifera]	44.44	2e-78	sp|P0A9T5|TAS_SHIFL	Protein tas OS=Shigella flexneri GN=tas PE=3 SV=1	100	0	D7SZH4	D7SZH4_VITVI Putative uncharacterized protein OS=Vitis vinifera GN=VIT_05s0049g01130 PE=4 SV=1	VC0667
224	gi|116783859|gb|ABK23114.1|	unknown [Picea sitchensis]	17046	MASEKEAALAATPDDGKPTIFDKILQKEIPSTVVYEDEKVLAFRDIAPQAPTHIIIIPKVRDGLTGLSQAEERHEDILGHLLYTAKVIAKQEGLSDGFRIVINDGPSGCQSVYHLHIHLLGGRQMNWPPG	44|56	11.5|11.5	1|1	3|2	3|2	1|1	1|1	---	---	1	1	-	-	---	---	1	1	-	-	---	---	1	1	-	-	---	---	1	1	-	-	gi|116783859|gb|ABK23114.1|	100	2e-71	gi|116792646|gb|ABK26444.1|	unknown [Picea sitchensis] >gi|148910222|gb|ABR18192.1| unknown [Picea sitchensis] >gi|224284605|gb|ACN40035.1| unknown [Picea sitchensis]	81.25	7e-51	sp|P42855|ZB14_BRAJU	14 kDa zinc-binding protein (Fragment) OS=Brassica juncea PE=3 SV=1	100	5e-70	A9NR53	A9NR53_PICSI Putative uncharacterized protein OS=Picea sitchensis PE=2 SV=1	all4087
225	gi|460413787|ref|XP_004252260.1|	PREDICTED: agmatine deiminase-like [Solanum lycopersicum]	47156	MDLKGTPVENGYRMPAEWEPHSGCWMGWPERPDNWRNNAVHGQRAFATVASAISRFESVTVCASAAQWENARSLLPKHIRVVEMSINDSWFRDTGPTFVIRNTTANAENAVSSVAGVDWNFNSWGGVVEGCYKDWNLDLLVARKILAIEKLPKFPHSMVLEGGSIHVDGEGTCLTTEECLLNKNRNPHLSKEQIENELKAYLGVRKIIWLPRGLLGDEDTNGHIDNMCCFVKPGVVLLSWTDDVSDEQYERSFEALSILENTSDASGRKIEVIKLHVPGPLYMTDEEAAGIVQDGEAKPRPSGTRLAASYVNFYIANGAIITPQFGDKKWDEEAIRVLSLAFPNHEVVGIEGAREIVLAGGNIHCITQQQPTGPE	22|-	2.4|-	-|-	1|-	1|-	1|-	1|-	---	-	-	-	-	-	---	-	-	-	-	-	---	-	-	-	-	-	---	-	-	-	-	-	gi|460413787|ref|XP_004252260.1|	100	0	gi|460413787|ref|XP_004252260.1|	PREDICTED: agmatine deiminase-like [Solanum lycopersicum]	72.51	4e-165	sp|Q8GWW7|AGUA_ARATH	Agmatine deiminase OS=Arabidopsis thaliana GN=AIH PE=1 SV=2	79.09	1e-179	B9RE78	B9RE78_RICCO Agmatine deiminase, putative OS=Ricinus communis GN=RCOM_1619080 PE=3 SV=1	PA0292
226	gi|58201024|gb|AAW66657.1|	thiamine biosynthetic enzyme [Picrorhiza kurrooa]	43106	MAAMAATLTSSLTKSSFLDTKSSIYGSPLSSRATIQRVKSSPQNLSVTMSAATPAYDLDNLTFAPIKESIVSREMTRRYMMDMITYADTDVVVVGAGSAGLSCAYELSKNPNINIAIIEQSVSPGGGAWLGSQLFSAMVVRKPAPKFLDELEIAYDEQDDYVVIKHAALFTSTIMSKLLARPNVKLFNAVAAEDLIVKGGRVAGVVTNWALVSMNHDTQSCMDPNVMESKIVVSSCGHDGPFGATGVKRLRSIGMIDSVPGMKALDMNTAEDAIVRLAREIVPGMIVTGMEVAEIDGSPRMGPTFGAMMISGQKAAHLALKALGQPNALDDSYDGLKAEEFVLAAADAGDIVDA	-|1130	-|16.7	-|2	-|34	-|19	-|4	-|1	-	1.102	-	10	-	-	-	1.47	-	8	-	*	-	0.929	-	11	-	-	-	1.427	-	9	-	-	gi|58201024|gb|AAW66657.1|	100	0	gi|58201024|gb|AAW66657.1|	thiamine biosynthetic enzyme [Picrorhiza kurrooa]	83.87	1e-06	sp|P84548|THI4_POPEU	Thiamine thiazole synthase, chloroplastic (Fragments) OS=Populus euphratica GN=THI1 PE=1 SV=1	100	0	Q5G1J2	Q5G1J2_9LAMI Thiamine biosynthetic enzyme OS=Picrorhiza kurrooa PE=2 SV=1	SPBC26H8.01
227	gi|13430186|gb|AAK25760.1|AF334840_1	ribosomal protein L33 [Castanea sativa]	17090	MVKGRQGERVRLYVRGTILGYKRSKSNQYPNTSLIQIEGVNTKEEVGWYAGKRMAYVYKAKVKKDGSHYRCIWGKVARPHGNSGVVRAKFKSNLPPKSMGARVRVFMYPSNI	-|20	-|7.1	-|31	-|1	-|1	-|1	-|1	-	---	-	-	-	-	-	---	-	-	-	-	-	---	-	-	-	-	-	---	-	-	-	-	gi|13430186|gb|AAK25760.1|AF334840_1	100	1e-59	gi|13430186|gb|AAK25760.1|AF334840_1	ribosomal protein L33 [Castanea sativa]	91.07	7e-56	sp|Q9C912|R35A3_ARATH	60S ribosomal protein L35a-3 OS=Arabidopsis thaliana GN=RPL35AC PE=3 SV=1	100	2e-58	Q9ATF4	Q9ATF4_CASSA Ribosomal protein L33 OS=Castanea sativa PE=4 SV=1	YOR234c
228	gi|18398691|ref|NP_566361.1|	monodehydroascorbate reductase (NADH) [Arabidopsis thaliana] >gi|50401194|sp|Q9SR59.1|MDAR1_ARATH RecName: Full=Probable monodehydroascorbate reductase, cytoplasmic isoform 1; Short=MDAR 1 >gi|20147349|gb|AAM10387.1| AT3g09940/T22K18_25 [Arabidopsis	59645	MAEEKSYKYVIIGGGVAGGYAAREFSNQGLKPGELAIISKEPVPPFERPELTKVYIDLEVNPTLANIYVCAGTGEAKQYPNWYKEKGIDLIVGTEIVKADLASKTLVSDDGKIYKYQTLLIATGSTNIRLSEIGVQEADVKNIFYLREIEDSDELALAMELYVQRGKAVIIGGGFLGLEISSALRANNHEVTMVFPEPWLVHRFFTAEIASFYESYYANKGIKIIKGTVATGFSTNSDGEVTEVKLEDGRTLEANIVVAGVGARPATSLFKGQLEEEKGGIKTDGFFKTSVPDVYALGDVATFPMKMYGGTRRVEHADNARKSAAQAVKAIKAGEEGKTIPDYDYLPYFYSRFFKLSWEFYGENVGESVLFGDNDPKSPKPKFGTYWVKDGKVVGVFLE…	23|21	4.1|4.1	2|2	1|1	1|1	1|1	1|1	---	---	-	-	-	-	---	---	-	-	-	-	---	---	-	-	-	-	---	---	-	-	-	-	gi|18398691|ref|NP_566361.1|	100	0	gi|18398691|ref|NP_566361.1|	monodehydroascorbate reductase (NADH) [Arabidopsis thaliana] >gi|50401194|sp|Q9SR59.1|MDAR1_ARATH RecName: Full=Probable monodehydroascorbate reductase, cytoplasmic isoform 1; Short=MDAR 1 >gi|20147349|gb|AAM10387.1| AT3g09940/T22K18_25 [Arabidopsis thaliana] >gi|24111369|gb|AAN46808.1| At3g09940/T22K18_25 [Arabidopsis thaliana] >gi|332641317|gb|AEE74838.1| monodehydroascorbate reductase (NADH) […	100	0	sp|Q9SR59|MDAR1_ARATH	Probable monodehydroascorbate reductase, cytoplasmic isoform 1 OS=Arabidopsis thaliana GN=At3g09940 PE=2 SV=1	98.19	0	B3H5M0	B3H5M0_ARATH Monodehydroascorbate reductase (NADH) OS=Arabidopsis thaliana GN=MDHAR PE=4 SV=1	Cgl2652
229	gi|118481033|gb|ABK92470.1|	unknown [Populus trichocarpa]	66088	MTFSHPTRMSKISTLSLFLLLLTFFLPVCTARASSITDDLQNNCLKVPVNQFVGSLTSTLDIIRDVISIISNFGNVFGDIRLTNAITDCLDLLDFSADELSWSMSASQNPNGKHNSTGDLSSDLRTWLSAALVNQDTCIEGFDGTNNILKGLVSGSLNQITSSVQELLKNVDPHTNSKSSGGGFSGSKSGNNDRFPSWVKHEDRKLLVLNGVTPNVIVAADGTGNFTKIMDAVAAAPDYSMHRHIIYIKKGVYNEYVDIKKKKWNLMMVGEGMNATIITGNRNFIDGWTTFRSATFAVSGRGFIARDITFENTAGPSKHQAVALRSDSDLSVFFRCEIKSYQDSLYTHTMRQFYRECRVSGTVDFIFGDATAVFQNCQILARKGLPDQKNTVTAHGRKD…	-|24	-|2.3	-|1	-|1	-|1	-|1	-|1	-	---	-	-	-	-	-	---	-	-	-	-	-	---	-	-	-	-	-	---	-	-	-	-	gi|118481033|gb|ABK92470.1|	100	0	gi|118481033|gb|ABK92470.1|	unknown [Populus trichocarpa]	70.62	0	sp|Q43062|PME_PRUPE	Pectinesterase/pectinesterase inhibitor PPE8B OS=Prunus persica PE=2 SV=1	100	0	A9P7W7	A9P7W7_POPTR Pectinesterase OS=Populus trichocarpa PE=2 SV=1	CAC3373
230	gi|15223017|ref|NP_172259.1|	Ca2+-transporting ATPase [Arabidopsis thaliana] >gi|12643704|sp|P92939.2|ECA1_ARATH RecName: Full=Calcium-transporting ATPase 1, endoplasmic reticulum-type >gi|8439887|gb|AAF75073.1|AC007583_9 Strong similarity to ER-type calcium pump protein from A	134049	MGKGSEDLVKKESLNSTPVNSDTFPAWAKDVAECEEHFVVSREKGLSSDEVLKRHQIYGLNELEKPEGTSIFKLILEQFNDTLVRILLAAAVISFVLAFFDGDEGGEMGITAFVEPLVIFLILIVNAIVGIWQETNAEKALEALKEIQSQQATVMRDGTKVSSLPAKELVPGDIVELRVGDKVPADMRVVALISSTLRVEQGSLTGESEAVSKTTKHVDENADIQGKKCMVFAGTTVVNGNCICLVTDTGMNTEIGRVHSQIQEAAQHEEDTPLKKKLNEFGEVLTMIIGLICALVWLINVKYFLSWEYVDGWPRNFKFSFEKCTYYFEIAVALAVAAIPEGLPAVITTCLALGTRKMAQKNALVRKLPSVETLGCTTVICSDKTGTLTTNQMAVSKLV…	57|-	1.0|-	25|-	3|-	3|-	1|-	1|-	---	-	-	-	-	-	---	-	-	-	-	-	---	-	-	-	-	-	---	-	-	-	-	-	gi|15223017|ref|NP_172259.1|	100	0	gi|15223017|ref|NP_172259.1|	Ca2+-transporting ATPase [Arabidopsis thaliana] >gi|12643704|sp|P92939.2|ECA1_ARATH RecName: Full=Calcium-transporting ATPase 1, endoplasmic reticulum-type >gi|8439887|gb|AAF75073.1|AC007583_9 Strong similarity to ER-type calcium pump protein from Arabidopsis thaliana gb|U93845. ESTs gb|AA042787 and gb|AI992578 come from this gene [Arabidopsis thaliana] >gi|1943751|gb|AAB52420.1| ER-type calcium …	100	0	sp|P92939|ECA1_ARATH	Calcium-transporting ATPase 1, endoplasmic reticulum-type OS=Arabidopsis thaliana GN=ECA1 PE=1 SV=2	97.27	0	D7KHV9	D7KHV9_ARALL Calcium-transporting ATPase 1, endoplasmic reticulum-type OS=Arabidopsis lyrata subsp. lyrata GN=ECA1 PE=3 SV=1	BH2515
231	gi|12744892|gb|AAK06838.1|AF328860_1	glyoxalase I [Avicennia marina]	25337	MASKESADNNPGLHTSLDEATKGYFLQQTMLRVKDPKVSLDFYSRIMGMSLLKRLDFPEMKFSLYFLGYEDTSSAPSDPVERTSWTFGQKAVLELTHNWGTESDPEFKGYHNGNSDPRGFGHIGVTVDDVHKACERFESLGVEFVKKPRDGKIMDVAFIKDPDGYWIEIFDTRTIAKSTADAAV	92|117	19.6|15.2	-|-	5|5	5|3	3|2	3|1	0.655	0.304	2	2	-	-	1.116	1.659	2	2	-	-	0.985	0.732	2	2	-	-	0.648	0.351	2	2	-	-	gi|12744892|gb|AAK06838.1|AF328860_1	100	6e-106	gi|12744892|gb|AAK06838.1|AF328860_1	glyoxalase I [Avicennia marina]	80.11	4e-86	sp|O04885|LGUL_BRAJU	Lactoylglutathione lyase OS=Brassica juncea GN=GLY I PE=2 SV=1	100	5e-105	Q9AXH1	Q9AXH1_AVIMR Glyoxalase I OS=Avicennia marina PE=2 SV=1	XF1399
232	gi|32400774|gb|AAP80619.1|AF475097_1	acidic ribosomal protein P2, partial [Triticum aestivum] >gi|32400824|gb|AAP80644.1|AF475123_1 acidic ribosomal protein P2a-2 [Triticum aestivum]	14548	KFIAAYLLAYLSGNASPSAEDLTSILESVGCEIDNEKMELMLSQVKGKDITELLAAGREKFAAVPSGGGGVAVSAAAPAAGGAAAPAAESKKEEKVVEKEESDDDMGFSLFD	53|85	10.7|10.7	2|2	3|6	3|6	2|2	2|2	---	---	-	1	-	-	---	---	-	1	-	-	---	---	-	1	-	-	---	---	-	1	-	-	gi|32400774|gb|AAP80619.1|AF475097_1	100	2e-30	gi|32400774|gb|AAP80619.1|AF475097_1	acidic ribosomal protein P2, partial [Triticum aestivum] >gi|32400824|gb|AAP80644.1|AF475123_1 acidic ribosomal protein P2a-2 [Triticum aestivum]	83.61	7e-24	sp|P46252|RLA2A_MAIZE	60S acidic ribosomal protein P2A OS=Zea mays GN=RPP2A PE=1 SV=3	100	3e-29	Q7X729	Q7X729_WHEAT Acidic ribosomal protein P2 (Fragment) OS=Triticum aestivum PE=1 SV=1	SPBP8B7.06
233	gi|356495434|ref|XP_003516582.1|	PREDICTED: clathrin heavy chain 1-like [Glycine max]	225266	MAANAPIIMREALTLASVGINPQFITFTHVTMESDKYICVRETAPQNSVVMIDMTMPMQPLRRPITADSALMNPNTRILALKAHVPGSTQDHLQVFNIESKAKMKSYQMGQQVVFWKWITPKTLGIVTQSSVYHWSIEGDGEPVKVFDRTANLANNQIINYRCDPTEKWLVLIGIAPGSSDRPQLVKGNMQLFSVDQQRSQALEAHAASFATFRVAGNDKDSTLICFASKSINAGQVTSKMHAIELGAQPGKPSFSKKQADLFFPPDFADDFPVSMQISNKYGLIYVITKLGLLFVYDLETATAVYRNRISPDPIFLTTEASSEGGFYAINRRGQVLLATVNEATIVPFVSGQLNNLELAVSLAKRGNLPGAEELVVKRFQELFAQTKYKEAAELAAQS…	104|139	2.1|1.5	-|-	4|6	2|5	3|2	1|1	1.019	1.075	2	3	-	-	---	0.958	-	3	-	-	0.822	0.705	2	3	-	-	---	0.661	-	3	-	-	gi|356495434|ref|XP_003516582.1|	100	0	gi|356495434|ref|XP_003516582.1|	PREDICTED: clathrin heavy chain 1-like [Glycine max]	90.94	0	sp|Q0WNJ6|CLAH1_ARATH	Clathrin heavy chain 1 OS=Arabidopsis thaliana GN=CHC1 PE=1 SV=1	100	0	I1J8Z9	I1J8Z9_SOYBN Uncharacterized protein OS=Glycine max GN=Gma.6598 PE=4 SV=1	-
234	gi|225435760|ref|XP_002285722.1|	PREDICTED: putative mitochondrial 2-oxoglutarate/malate carrier protein-like [Vitis vinifera]	39066	MGDEKKPKASGVWPTIKPFVNGGTAGMLATCVIQPIDMIKVRIQLGQGSAGEVTKTMLKNEGMGAFYKGLSAGLLRQATYTTARLGSFRILTAKAIEANDGKPLPLYQKALCGLTAGAIGACVGSPADLALIRMQADATLPAAQRRHYTNAFHALYRIVADEGVLALWKGAGPTVVRAMALNMGMLASYDQSVEFFKDNLGFGEATTIIGASTVSGFFAAACSLPFDYVKTQIQKMQPDALGKYPYTGSMDCAMKTLKAGGPFKFYTGFPVYCVRIAPHVMMTWIFLNQIQKVEKSFGL	114|153	8.0|13.0	3|1	3|7	3|6	2|3	2|2	1.197	0.857	3	5	-	-	1.154	0.723	3	3	-	*	1.178	0.72	3	5	-	-	1.156	0.728	3	3	-	-	gi|225435760|ref|XP_002285722.1|	100	3e-175	gi|225435760|ref|XP_002285722.1|	PREDICTED: putative mitochondrial 2-oxoglutarate/malate carrier protein-like [Vitis vinifera]	84.28	3e-149	sp|Q9C5M0|DTC_ARATH	Mitochondrial dicarboxylate/tricarboxylate transporter DTC OS=Arabidopsis thaliana GN=DTC PE=1 SV=1	97.25	4e-163	F6GUN2	F6GUN2_VITVI Putative uncharacterized protein OS=Vitis vinifera GN=VIT_06s0004g00470 PE=3 SV=1	-
235	gi|472873|emb|CAA53475.1|	plasma membrane intrinsic protein 1a [Arabidopsis thaliana]	34866	MEGKEEDVRVGANKFPERQPIGTSAQSDKDYKEPPPAPFFEPGELSSWSFWRAGIAEFIATFLFLYITVLTVMGVKRSPNMCASVGIQGIAWAFGGMIFALVYCTAGISGGHINPAVTFGLFLARKLSLTRALYYIVMQCLGAICGAGVVKGFQPKQYQALGGGANTVAHGYTKGSGLGAEIIGTFVLVYTVFSATDAKRNARDSHVPILAPLPIGFAVFLVHLATIPITATGINPARSLGAAIIYNKDHSWDDHWVFWVGPFIGAALAALYHVVVIRAIPFKSRS	59|29	3.5|3.5	102|102	5|2	5|2	1|1	1|1	---	---	1	-	-	-	---	---	1	-	-	-	---	---	1	-	-	-	---	---	1	-	-	-	gi|472873|emb|CAA53475.1|	100	5e-158	gi|472873|emb|CAA53475.1|	plasma membrane intrinsic protein 1a [Arabidopsis thaliana]	99.65	5e-158	sp|P61838|PIP11_VICFA	Aquaporin PIP1.1 OS=Vicia faba GN=PIP1.1 PE=2 SV=1	99.3	5e-156	D7LS97	D7LS97_ARALL Putative uncharacterized protein OS=Arabidopsis lyrata subsp. lyrata GN=ARALYDRAFT_486618 PE=3 SV=1	SMc01870
236	gi|224056699|ref|XP_002298979.1|	predicted protein [Populus trichocarpa] >gi|222846237|gb|EEE83784.1| predicted protein [Populus trichocarpa]	45153	MGMAGKLMHAIQYDSYDGGPAALKHVEVPLPSPQKYEVLLKLEATSLNPIDWKIQKGKLRPFFPRKFPYIPGTDVAGEVVEVGAEVKNFKIGDRVVAELGHLYGGGLAEYAVAKESLTVVRPAEVSAAEGAGLLVSGITAYQALTQHGGIKLDGSGQQKNILITAASGGVGLYAVQLAKLGNTHVTATCGARNIELVKSLGADEVLDYKTPEGAALKSPSGKKYDVVLHCALGISWSTFEPTLSESGKVIDITPGASAMMTFVLKKLTFSKKQLVPILTVSPSIESLDCLIKLVKEGKLKTIIDSRHPLRKAEDAWAKSIDGHATGKIVVET	66|29	6.9|6.9	-|-	3|2	1|1	2|2	1|1	---	---	-	-	-	-	---	---	-	-	-	-	---	---	-	-	-	-	---	---	-	-	-	-	gi|224056699|ref|XP_002298979.1|	100	0	gi|224056699|ref|XP_002298979.1|	predicted protein [Populus trichocarpa] >gi|222846237|gb|EEE83784.1| predicted protein [Populus trichocarpa]	74.47	1e-131	sp|Q9SV68|QORH_ARATH	Putative quinone-oxidoreductase homolog, chloroplastic OS=Arabidopsis thaliana GN=At4g13010 PE=2 SV=1	100	0	B9GJI3	B9GJI3_POPTR Predicted protein OS=Populus trichocarpa GN=POPTRDRAFT_707961 PE=4 SV=1	lin0622
237	gi|42408377|dbj|BAD09528.1|	hypothetical protein [Oryza sativa Japonica Group]	7463	MDKAAEILASRGVPRLYYPVSQDTGSSGKPKEAIEIFKKMCRDGVEPDVVT	34|34	17.6|17.6	-|-	1|1	1|1	1|1	1|1	---	---	-	-	-	-	---	---	-	-	-	-	---	---	-	-	-	-	---	---	-	-	-	-	gi|42408377|dbj|BAD09528.1|	100	2e-22	gi|42408377|dbj|BAD09528.1|	hypothetical protein [Oryza sativa Japonica Group]	-	-	-	-	100	3e-21	Q6ZC67	Q6ZC67_ORYSJ Putative uncharacterized protein P0007D08.17 OS=Oryza sativa subsp. japonica GN=P0007D08.17 PE=4 SV=1	-
238	gi|312204961|gb|ADQ47741.1|	photosystem II reaction center protein D1 [Dictyota spiralis]	26194	TWITSTENRLYIGWFGCLMIPTLLTAASCYIIALIAAPPVBIDGIREPVAGSLLYGNNIISGAVIPSSNAIGIHFYPIWEAASVEEWLYNGGPYQLIVLHFLLGVASYMGREWELSYRLGMRPWIFVAFSAPVAAASAVFLVYPIGQGSFSDGMPLGISGTFNFMIVFQAEHNILMHPFHMAGVAGVFGGSLFSAMHGSLVTSSLIRETSENESVNYGYKFGQEEETYNIVAAH	-|23	-|6.0	-|1	-|1	-|1	-|1	-|1	-	---	-	-	-	-	-	---	-	-	-	-	-	---	-	-	-	-	-	---	-	-	-	-	gi|312204961|gb|ADQ47741.1|	100	2e-117	gi|312204961|gb|ADQ47741.1|	photosystem II reaction center protein D1 [Dictyota spiralis]	96.15	1e-114	sp|P24726|PSBA_ECTSI	Photosystem Q(B) protein OS=Ectocarpus siliculosus GN=psbA PE=3 SV=1	100	2e-116	E5DD99	E5DD99_9PHAE Photosystem II reaction center protein D1 (Fragment) OS=Dictyota spiralis GN=psbA PE=3 SV=1	-
239	gi|323454626|gb|EGB10496.1|	hypothetical protein AURANDRAFT_8963, partial [Aureococcus anophagefferens]	14830	DYYRVLGVPRDADESAIKKAYRKLAVKYHPDKNPDNPQAEENFKRVAEAYDCLSDAQKRAAYDSYGKEGARAAEQGGFPGGGGGGMRAHGVDPEEIFRQFFNQRGGGARG	28|-	12.7|-	-|-	2|-	2|-	1|-	1|-	---	-	-	-	-	-	---	-	-	-	-	-	---	-	-	-	-	-	---	-	-	-	-	-	gi|323454626|gb|EGB10496.1|	100	1e-50	gi|323454626|gb|EGB10496.1|	hypothetical protein AURANDRAFT_8963, partial [Aureococcus anophagefferens]	71.43	2e-22	sp|Q1H3B9|DNAJ_METFK	Chaperone protein DnaJ OS=Methylobacillus flagellatus (strain KT / ATCC 51484 / DSM 6875) GN=dnaJ PE=3 SV=1	100	1e-49	F0Y3X4	F0Y3X4_AURAN Putative uncharacterized protein (Fragment) OS=Aureococcus anophagefferens GN=AURANDRAFT_8963 PE=4 SV=1	RSc2634
240	gi|363814581|ref|NP_001242510.1|	uncharacterized protein LOC100808604 [Glycine max]	58742	MFGRAPKKSDNTRHYEILGVSKNASQDDLKKAYKKAAIKNHPDKGGDPEKFKELAQAYEVLSDPEKREIYDQYGEDALKEGMGGGGGHDPFDIFSSFFGGGSSRGRRQRRGEDVVHPLKVSLEDLYLGTSKKLSLSRNVICSKCTGKGSKSGASMKCAGCQGTGMKVSIRHLGPSMIQQMQHACNECKGTGETINDRDRCPQCKGEKVVQEKKVLEVIVEKGMQNGQKITFPGEADEAPDTITGDIVFVLQQKEHPKFKRKAEDLFVEHILSLTEALCGFQFVLTHLDGRQLLIKSNPGEVVKPDSYKAINDEGMPMYQRSFMKGKLYIHFTVEFPDSLNPDQVKALEAVLPPKPSSQLTDMELDECEETTLHDVNMEEETRRKQQQAQEAYDEDDDMP…	23|-	2.9|-	1|-	1|-	1|-	1|-	1|-	---	-	-	-	-	-	---	-	-	-	-	-	---	-	-	-	-	-	---	-	-	-	-	-	gi|363814581|ref|NP_001242510.1|	100	0	gi|363814581|ref|NP_001242510.1|	uncharacterized protein LOC100808604 [Glycine max]	88.7	0	sp|Q04960|DNJH_CUCSA	DnaJ protein homolog OS=Cucumis sativus GN=DNAJ1 PE=2 SV=1	100	0	C6THB9	C6THB9_SOYBN Putative uncharacterized protein OS=Glycine max PE=2 SV=1	SPBC1734.11
241	gi|384246575|gb|EIE20064.1|	Aldo/keto reductase, partial [Coccomyxa subellipsoidea C-169]	33909	VTLNNGVVMPLVGFGTAGLGAATEEATAWALASGYRLLDSAQAQEWYREDLVGLAVLKSRVPREQVFLTSKLHPRHHGREEAMIQFTKSLSALAVEQVDLFLLHYPECWPGLCGEGFTPKGTWHDSWRALEDLVDKGLVRAIGVSNFGIDELAELLAMARIKPALVQRHSDPLAADAEVRAFCRLAGIQYQGYSTLGSQWLMRGMDENPVLTNPVVDRVANETGRDAAQVVLRWALQHGQGIVPRSSKKERIAANRDLDFVLSADQMHRIDFLDGSLLHTV	18|-	4.3|-	-|-	1|-	1|-	1|-	1|-	---	-	-	-	-	-	---	-	-	-	-	-	---	-	-	-	-	-	---	-	-	-	-	-	gi|384246575|gb|EIE20064.1|	100	1e-150	gi|384246575|gb|EIE20064.1|	Aldo/keto reductase, partial [Coccomyxa subellipsoidea C-169]	38.99	2e-38	sp|P22045|PGFS_LEIMA	Prostaglandin F synthase OS=Leishmania major GN=P100/11E PE=1 SV=3	100	1e-149	I0YNU5	I0YNU5_9CHLO Aldo/keto reductase (Fragment) OS=Coccomyxa subellipsoidea C-169 GN=COCSUDRAFT_18799 PE=4 SV=1	BS_yvgN
242	gi|462420026|gb|EMJ24289.1|	hypothetical protein PRUPE_ppa007032mg [Prunus persica]	45413	MKIFVKTLKGTHFDVAVKPEDTVSDVKKQIETSQGSDVYPASQQMLIHQGKVLKDSTTLDENKVAENSFVVIMLTKSKSSLGEGSGASTATITKAPQPSAPSAAPTVTLTAPQAPIPTSASPASVTTPAPVSSATMEVESNPYGQAASDLVAGTNLEGTIQQILDMGGGTWDRDTVVRALRAAFNNPARAIDYLYSGIPEQPEVPPVAHIPVSGEAANLPAQSPQSAQPASTPPSGPNANPLNLFPQGLPNVGAGGAGAGNLDFLRDSQQFQALRAMVQANPQILQPMLQELGKQNPNLMRLIQQHQADFLRLINEPVEGGEGNILGDAAVPQSISVTPEEREAIERLEAMGFDRAIVLEVFFACNKNEELAANYLLDHMHEFEE	29|-	2.3|-	2|-	1|-	1|-	1|-	1|-	---	-	-	-	-	-	---	-	-	-	-	-	---	-	-	-	-	-	---	-	-	-	-	-	gi|462420026|gb|EMJ24289.1|	100	0	gi|462420026|gb|EMJ24289.1|	hypothetical protein PRUPE_ppa007032mg [Prunus persica]	65.34	1e-131	sp|Q84L31|RD23C_ARATH	Putative DNA repair protein RAD23-3 OS=Arabidopsis thaliana GN=RAD23-3 PE=2 SV=2	82.05	3e-30	Q1KUM6	Q1KUM6_9ROSI Putative uncharacterized protein OS=Cleome spinosa PE=4 SV=1	SPBC2D10.12
243	gi|147818338|emb|CAN75840.1|	hypothetical protein VITISV_031633 [Vitis vinifera]	30427	MAAPAVTLTLGSLGVPTQAHKAFTLQPTSRFLRPSFPSRFIGPNASPLAPSKSYTTPTRGASFKTAVASIESDQLSSSDPANMQEQGSGKYYFVVANAKFMLDEEEHFKELLFERLRYYGERSKEQDFWLVIEPKFLDKFPNITKRLRRPAVALVSTNGPWITFMKLRLDRVLSESYEAVSLEEALASNPTDIEFEKPENWVAPYPKYEFGWWEPFLPPGSVKPKV	-|40	-|4.4	-|3	-|1	-|1	-|1	-|1	-	---	-	-	-	-	-	---	-	-	-	-	-	---	-	-	-	-	-	---	-	-	-	-	gi|147818338|emb|CAN75840.1|	100	2e-93	gi|297745731|emb|CBI15787.3|	unnamed protein product [Vitis vinifera]	45.16	2e-08	sp|P72777|YC54L_SYNY3	Ycf54-like protein OS=Synechocystis sp. (strain PCC 6803 / Kazusa) GN=slr1780 PE=3 SV=1	100	2e-127	A5AMD2	A5AMD2_VITVI Putative uncharacterized protein OS=Vitis vinifera GN=VITISV_031633 PE=4 SV=1	-
244	gi|297805132|ref|XP_002870450.1|	hypothetical protein ARALYDRAFT_915712 [Arabidopsis lyrata subsp. lyrata] >gi|297316286|gb|EFH46709.1| hypothetical protein ARALYDRAFT_915712 [Arabidopsis lyrata subsp. lyrata]	40423	MGRVYNKADSTTIKGCSSNSRSRYSSVAVNCEIAGTRGLRMHWKGKASVILDKCTMILENDAYRKMTTSKDPCLPAEGDEIRGLRDSVWDDGEICIAPESDSEVSDVPEDIKPHQWLGLYCYNFQKGTDYEFKCVRNCYTEFGSLITLEAMNPANSSPLTFEMLVKHDDLTEGVQSWWKIKGSKEADHEWDNEAIDDRYKGEMPKWLSDDDLQHCYVVKDSELMETKNWWLLLFSEFAFYTKWSGTLRPRDAVECLPLETQKVVVETQGKAETEPRELRSSRRQMQSST	-|17	-|2.4	-|-	-|1	-|1	-|1	-|1	-	---	-	-	-	-	-	---	-	-	-	-	-	---	-	-	-	-	-	---	-	-	-	-	gi|297805132|ref|XP_002870450.1|	100	2e-164	gi|297805132|ref|XP_002870450.1|	hypothetical protein ARALYDRAFT_915712 [Arabidopsis lyrata subsp. lyrata] >gi|297316286|gb|EFH46709.1| hypothetical protein ARALYDRAFT_915712 [Arabidopsis lyrata subsp. lyrata]	39.19	9e-15	sp|Q9FN07|Y5638_ARATH	UPF0725 protein At5g63820 OS=Arabidopsis thaliana GN=At5g63820 PE=3 SV=1	100	2e-163	D7MHW2	D7MHW2_ARALL Putative uncharacterized protein OS=Arabidopsis lyrata subsp. lyrata GN=ARALYDRAFT_915712 PE=4 SV=1	-
245	gi|28194665|gb|AAO33594.1|AF480949_1	ribosomal protein S4 [Triquetrella tristicha] >gi|28194735|gb|AAO33629.1|AF480984_1 ribosomal protein S4 [Triquetrella arapilensis] >gi|157887692|emb|CAM33368.1| ribosomal protein S4 [Triquetrella arapilensis] >gi|157887694|emb|CAM33369.1| ribosomal	28474	PRVKIIRRLGTLPGLSNKIPHLKSSSTNQSTSNKKISQYRIRLEEKQKLRFHYGITERQLLNYVRIARKAKGSTGLILLQLLEMRLDNVIFRLGMAPTIPGARQIVNHRHILVNNRIVDIPSYRCKPQDFITINDRKKSQVMITKNVDFSQKSKIPNHLAFNSLEKKGLINQILDQESIGLKINELLVVEYYSRQA	53|-	11.2|-	12|-	2|-	1|-	2|-	1|-	---	-	-	-	-	-	---	-	-	-	-	-	---	-	-	-	-	-	---	-	-	-	-	-	gi|28194665|gb|AAO33594.1|AF480949_1	100	2e-98	gi|63078650|gb|AAY29411.1|	ribosomal protein S4 [Triquetrella tristicha]	85.71	2e-86	sp|P59142|RR4_HYPCP	30S ribosomal protein S4, chloroplastic OS=Hypnum cupressiforme GN=rps4 PE=3 SV=1	100	2e-97	A8E0N6	A8E0N6_9BRYO Ribosomal protein S4 (Fragment) OS=Triquetrella papillata GN=rps4 PE=3 SV=1	slr0469
246	gi|159463830|ref|XP_001690145.1|	predicted protein [Chlamydomonas reinhardtii] >gi|158284133|gb|EDP09883.1| predicted protein [Chlamydomonas reinhardtii]	133501	MSVPEEPAETLRLIEQTRAITLLEYDWATSLDYGGIQTSEAEAGLSRAAKGGMLTPQQLRGIVTLVNGAERLRKQVVIAARDNDALRPDSPVRLLLAAVGRVRPQPHLLRSVAQAIDEDNNIQDSASEQLRGLRGRVKAIQSRLASMLKGYGGEVSDRGGRMCVALPGGTKAPSGGVLLGSAPGGSLVYVEPAAAVAMNNELGAARAEAQAAEEQVLWNLTGLVMGCLDELQDAYRTVAWLDVLSARARYGIWVNGVLPDVVPWEKVFHARGAAAMRRRSTTAAAAAEQDQTSSSGAVDPDERYAVRLRGLRHPLLYGEYLIAKEGLEREVRMTGGGGSSNMSSLFGSGSGGSVSGASTPGGGRRRMLSTRKEVMLQRSGLSGGASPAGSGADSDTDGE…	-|38	-|0.6	-|1	-|1	-|1	-|1	-|1	-	---	-	-	-	-	-	---	-	-	-	-	-	---	-	-	-	-	-	---	-	-	-	-	gi|159463830|ref|XP_001690145.1|	100	3e-37	gi|159463830|ref|XP_001690145.1|	predicted protein [Chlamydomonas reinhardtii] >gi|158284133|gb|EDP09883.1| predicted protein [Chlamydomonas reinhardtii]	49.41	1e-19	sp|B9MK78|MUTS2_CALBD	MutS2 protein OS=Caldicellulosiruptor bescii (strain ATCC BAA-1888 / DSM 6725 / Z-1320) GN=mutS2 PE=3 SV=1	100	1e-08	A8HMH7	A8HMH7_CHLRE Predicted protein OS=Chlamydomonas reinhardtii GN=CHLREDRAFT_146712 PE=4 SV=1	sll1772
247	gi|115802|sp|P27494.1|CB23_TOBAC	RecName: Full=Chlorophyll a-b binding protein 36, chloroplastic; AltName: Full=LHCII type I CAB-36; Short=LHCP; Flags: Precursor >gi|19827|emb|CAA41188.1| chlorophyll a/b binding protein [Nicotiana tabacum]	32993	MATSAIEQSAFAGQTALKSQNELVRKIGSFNGGRATMRRTVKSAPQSIWYGEDRPKYLGPFSEQTPSYLTGEFPGDYGWDTAGLSADPETFARNRELEVIHCRWAMLGALGCVFPEILSKNGVKFGEAVWFKAGSQIFSEGGLDYLGNPNLIHAQSILAVWASQVVLMGLIEGYRVGGGPLGEGLDKIYPGGAFDPLGLADDPEAFAELKVKEIKNGRLAMFSMFGFFVQAIVTGKGPIENLFDHVADPVANNAWAYATNFVPGK	642|751	21.5|21.5	3|3	27|27	12|17	4|4	2|2	0.826	1.17	4	9	-	-	1.259	1.35	5	8	-	*	2.348	1.878	4	9	*	*	2.109	2.431	5	9	*	*	gi|115802|sp|P27494.1|CB23_TOBAC	100	1e-153	gi|115802|sp|P27494.1|CB23_TOBAC	RecName: Full=Chlorophyll a-b binding protein 36, chloroplastic; AltName: Full=LHCII type I CAB-36; Short=LHCP; Flags: Precursor >gi|19827|emb|CAA41188.1| chlorophyll a/b binding protein [Nicotiana tabacum]	100	5e-154	sp|P27494|CB23_TOBAC	Chlorophyll a-b binding protein 36, chloroplastic OS=Nicotiana tabacum GN=CAB36 PE=3 SV=1	95.47	4e-147	Q41449	Q41449_SOLTU Chlorophyll a,b binding protein type I OS=Solanum tuberosum PE=4 SV=1	-
248	gi|33325131|gb|AAQ08198.1|	eukaryotic translation initiation factor 5A isoform VIII [Hevea brasiliensis]	22439	SDEEHHFESKADAGASKTYPQQAGTIRKNGYIVIKNRPCKVVEVSTSKTGKHGHAKCHFVGIDIFNGKKLEDIVPSSHNCDVPHVTRTDYQLIDISEDGFVSLLTENGNTKDDLRLPTDENLLTQIKDGFAEGKDLVVTVMSSMGEEQICALKDIGPK	43|44	7.6|7.6	4|4	1|2	1|2	1|1	1|1	---	---	1	-	-	-	---	---	1	-	-	-	---	---	1	-	-	-	---	---	1	-	-	-	gi|33325131|gb|AAQ08198.1|	100	4e-45	gi|33325133|gb|AAQ08199.1|	eukaryotic translation initiation factor 5A isoform IX, partial [Hevea brasiliensis]	94.3	2e-85	sp|Q9AXJ4|IF5A_MANES	Eukaryotic translation initiation factor 5A OS=Manihot esculenta PE=2 SV=2	100	8e-88	Q71F44	Q71F44_HEVBR Eukaryotic translation initiation factor 5A isoform VIII (Fragment) OS=Hevea brasiliensis GN=eIF-5A PE=2 SV=1	YJR047c
249	gi|164604990|dbj|BAF98291.1|	2-C-methyl-D-erythritol 4-phosphate cytidylyltransferase [Hevea brasiliensis]	43027	MGHHLLHLNLTIISPSASFKSSNSLFPCNHPQIPTNSFHLPSLSKSSVHKISWIQKLPRIATATIKCSAKIENSSAAAKEKSVSVILLAGGKGKRMGASMPKQYLPLLGQPIALYSFYTFSKMIEVKEIVVVCDPSYQDIFEDAKENINVDLKFALPGKERQDSVYSGLHEVDLNSELVCVHDSARPLVSSADVKKVIEDAWINGAAVLGVPAKATIKEANSESFVVRTLDRKTLWEMQTPQVIKPDLLKKGFELVNRDGLEVTDDVSIVEHLKHPVYITEGSYTNIKVTTPDDLLLAERILNLNSEESSK	-|173	-|12.9	-|1	-|11	-|1	-|3	-|1	-	---	-	-	-	-	-	---	-	-	-	-	-	---	-	-	-	-	-	---	-	-	-	-	gi|164604990|dbj|BAF98291.1|	100	1e-169	gi|164604990|dbj|BAF98291.1|	2-C-methyl-D-erythritol 4-phosphate cytidylyltransferase [Hevea brasiliensis]	79.26	4e-95	sp|Q5N8G1|ISPD_ORYSJ	2-C-methyl-D-erythritol 4-phosphate cytidylyltransferase, chloroplastic OS=Oryza sativa subsp. japonica GN=ISPD PE=2 SV=1	100	1e-168	A9ZN09	A9ZN09_HEVBR 2-C-methyl-D-erythritol 4-phosphate cytidylyltransferase OS=Hevea brasiliensis GN=HbCMS PE=2 SV=1	CPn0579
250	gi|30679669|ref|NP_195873.2|	THO complex subunit 4 [Arabidopsis thaliana] >gi|30023796|gb|AAP13431.1| At5g02530 [Arabidopsis thaliana] >gi|332003102|gb|AED90485.1| THO complex subunit 4 [Arabidopsis thaliana]	34412	MSGGLDMSLDDIIKSNRKPTGSRGRGGIGGGNNTGGRGGSGSNSGPSRRFANRVGARTAPYSRPIQQQQAHDAMWQNDVFATDASVAAAFGHHQTAVVGGGSSIETGTKLYISNLDYGVSNEDIKELFSEVGDLKRYGIHYDRSGRSKGTAEVVFSRRGDALAAVKRYNNVQLDGKLMKIEIVGTNLSAPALPILATAQIPFPTNGILGNFNENFNGNFNGNFNGNFRGRGRGGFMGRPRGGGFGGGNFRGGRGARGRGGRGSGGRGRDENVSAEDLDAELDKYHKEAMETS	-|89	-|5.5	-|19	-|2	-|2	-|1	-|1	-	0.469	-	2	-	-	-	0.812	-	2	-	-	-	1.369	-	2	-	*	-	0.495	-	2	-	-	gi|30679669|ref|NP_195873.2|	100	3e-96	gi|334187381|ref|NP_001190207.1|	THO complex subunit 4 [Arabidopsis thaliana] >gi|332003103|gb|AED90486.1| THO complex subunit 4 [Arabidopsis thaliana]	48.55	3e-28	sp|Q28FB9|THOC4_XENTR	THO complex subunit 4 OS=Xenopus tropicalis GN=alyref PE=2 SV=1	100	3e-95	Q9LZ49	Q9LZ49_ARATH Putative uncharacterized protein T22P11_120 OS=Arabidopsis thaliana GN=T22P11_120 PE=4 SV=1	YCL011c
251	gi|45737901|gb|AAS75817.1|	(E)-4-hydroxy-3-methylbut-2-enyl diphosphate synthase [Nicotiana benthamiana]	33801	MPFKDLATVDSIPLRELPPVDDKDSRLALKRLVDISMGVITPLSEQLTKPLTNVMVLVTLKELSGGAQKLLPEGTRLVVSVRGDESKDELEILKSTDVTMILHHLPYTEEKIGRVHAARRLFEYLSQNSLNFPVIHHIHFPNDTHRDDLVIGAGANAGALLVDGLGDGILLEAPDQDFDFLRNTSFNLLQGCRMRNTKTEYVSCPSCGRTLFDLQEISAQIREKTSHLPGVSIAIMGCIVNGPGEMADADFGYVGGAPGKIDLYDGKT	-|19	-|4.5	-|-	-|1	-|1	-|1	-|1	-	---	-	-	-	-	-	---	-	-	-	-	-	---	-	-	-	-	-	---	-	-	-	-	gi|45737901|gb|AAS75817.1|	100	3e-139	gi|45737901|gb|AAS75817.1|	(E)-4-hydroxy-3-methylbut-2-enyl diphosphate synthase [Nicotiana benthamiana]	84.7	2e-120	sp|F4K0E8|ISPG_ARATH	4-hydroxy-3-methylbut-2-en-1-yl diphosphate synthase, chloroplastic OS=Arabidopsis thaliana GN=ISPG PE=1 SV=1	100	3e-138	Q6RI20	Q6RI20_NICBE (E)-4-hydroxy-3-methylbut-2-enyl diphosphate synthase (Fragment) OS=Nicotiana benthamiana PE=2 SV=1	CPn0373
252	gi|19570344|dbj|BAB86292.1|	nucleoside diphosphate kinase 1 [Brassica rapa] >gi|19744165|dbj|BAB86841.1| NDPK I [Brassica rapa]	19789	MEQTFIMIKPDGVQRGLVGEIICRFEKKGFTLKGLKLITVDRPFAEKHYQDLSAKPFFSSLVDYIISGPVVAMIWEGKNVVLTGRKIIGATNPAASEPGTIRGDYAIDIGRNVIHGSDSVESANKEAALWFPDGPVNWQSSLHSWIYE	-|86	-|25.0	-|-	-|10	-|1	-|4	-|1	-	---	-	-	-	-	-	---	-	-	-	-	-	---	-	-	-	-	-	---	-	-	-	-	gi|19570344|dbj|BAB86292.1|	100	9e-83	gi|19570344|dbj|BAB86292.1|	nucleoside diphosphate kinase 1 [Brassica rapa] >gi|19744165|dbj|BAB86841.1| NDPK I [Brassica rapa]	89.8	1e-73	sp|Q39839|NDK1_SOYBN	Nucleoside diphosphate kinase 1 OS=Glycine max PE=2 SV=1	100	1e-81	Q8RUX2	Q8RUX2_BRACM Nucleoside diphosphate kinase OS=Brassica campestris GN=Bc-NDPK1 PE=2 SV=1	sll1852
253	gi|162036292|gb|ABX82323.1|	elongation factor 1 subunit alpha [Cenchrus americanus]	31876	EKTHINIVVMGHVDSGKSTTTGHLIYKLGGIDKRVIERFEKEAAEMNKRSFKYAWVLDKLKAERERGITIDIALWKFETTKYYCTVIDAPGHRDFIKNMITGTSQADCAVLIIDPTTGGFEAGISKDGQTREHALLAFTLGVKQMIRCCNKMDATTPKYSKARYDEIVKEVSSYLKKVGYNPDKIAFVPISGFEGDNTIERSTNLDWYKGPTLLEALDQ	56|-	10.0|-	-|-	3|-	1|-	2|-	1|-	---	-	-	-	-	-	---	-	-	-	-	-	---	-	-	-	-	-	---	-	-	-	-	-	gi|162036292|gb|ABX82323.1|	100	2e-127	gi|162036292|gb|ABX82323.1|	elongation factor 1 subunit alpha [Cenchrus americanus]	97.72	5e-125	sp|O64937|EF1A_ORYSJ	Elongation factor 1-alpha OS=Oryza sativa subsp. japonica GN=REFA1 PE=2 SV=2	100	2e-126	B3SU24	B3SU24_PENAM Elongation factor 1 subunit alpha (Fragment) OS=Pennisetum americanum GN=EF1-alpha PE=4 SV=1	SPCC794.09c
254	gi|77416945|gb|ABA81868.1|	unknown [Solanum tuberosum]	37797	MNLNSVKVPKMPGGGATSALIKFGVIAGLGVYGVANSLYNVEGGHRAIVFNRIGGVKNKVYPEGTHFMIPWFERPVIYDVRARPHLVESTSGSRDLQMVKIGLRVLTRPVSDQLPTVYRSLGENYNERVLPSIIHETLKAVVAQYNASQLITQRENVSREIRKILTERAANFNIALDDVSITSLTFGKEFTAAIEAKQVAAQEAERAKFVVEKAEQDKRSAVIRAQGEAKSAQLIGQAIANNPAFITLRKIEAAREIAQTISHAANKVYLSAMICCLTFRTSTWTLQESDLDSATD	96|118	11.5|11.5	14|14	4|3	2|3	2|2	1|2	1.572	---	2	1	-	-	0.914	---	2	-	-	-	2.074	---	2	1	-	-	2.68	---	2	-	-	-	gi|77416945|gb|ABA81868.1|	100	2e-173	gi|77416945|gb|ABA81868.1|	unknown [Solanum tuberosum]	87.27	2e-130	sp|O49460|PHB1_ARATH	Prohibitin-1, mitochondrial OS=Arabidopsis thaliana GN=PHB1 PE=1 SV=1	100	2e-172	Q38M64	Q38M64_SOLTU Putative uncharacterized protein OS=Solanum tuberosum PE=2 SV=1	SPCC1322.16
255	gi|396080681|gb|AFN82301.1|	ribulose-1,5-bisphosphate carboxylase/oxygenase, partial (chloroplast) [Baeometra sp. Chase 2222]	32895	TETKASAGFKAGVKDYKLTYYTPEYQTKDTDILAAFRVTPQPGVPPEEAGAAVAAESSTGTWTTVWTDGLTSLDRYKGRCYSIEKLIGEDNQYIAYVAYPLDLFEEGSVTNMFTSIVGNVFGFKALRALRLEDLRIPPAYSKTFQGPPHGIQVERDKLNKYGRPLLGCTIKPKLGLSAKNYGRAVYECLRGGLDFTKDDENVNSQPFMRWRDRFLFCAEAIYKAQAETGEIKGHYLNATAGYMX	648|540	45.5|41.8	-|-	64|41	1|1	8|7	1|1	---	---	-	-	-	-	---	---	-	-	-	-	---	---	-	-	-	-	---	---	-	-	-	-	gi|396080681|gb|AFN82301.1|	100	9e-131	gi|396080681|gb|AFN82301.1|	ribulose-1,5-bisphosphate carboxylase/oxygenase, partial (chloroplast) [Baeometra sp. Chase 2222]	96.68	1e-126	sp|Q3V526|RBL_ACOCL	Ribulose bisphosphate carboxylase large chain OS=Acorus calamus GN=rbcL PE=3 SV=2	99.57	2e-125	A2VAM9	A2VAM9_9LILI Ribulose bisphosphate carboxylase large subunit (Fragment) OS=Onixotis sp. Duncan 361 GN=rbcL PE=3 SV=1	alr1524
256	gi|162464059|ref|NP_001104914.1|	pyruvate dehydrogenase2 [Zea mays] >gi|3850999|gb|AAC72192.1| pyruvate dehydrogenase E1 beta subunit isoform 1 [Zea mays] >gi|414869708|tpg|DAA48265.1| TPA: pyruvate dehydrogenase E1 component subunit beta [Zea mays]	44636	MLGVARRRLGSGCVLAQLAQALRPAAAPARTYSAAAKEITVREALNTALDEEMSADPSVFLMGEEVGEYQGAYKISKGLLDKYGPDRVLDTPITEAGFTGIGVGAAYHGLRPIVEFMTFNFSMQAIDHIINSAAKSNYMSAGQISVPIVFRGPNGAAAGVGAQHSQCYAAWYAHVPGLKVLAPYSAEDARGLLKAAIRDPDPVVFLENELLYGESFPVSAEVLDSSFCLPIGKAKIERQGKDVTITAFSKMVGYALQAADILAKEGISAEVINLRSIRPLDRATINASVRKTNRLVTVEEGFPQHGIGAEICMSVVEDSFEYLDAPVERIAGADVPMPYAANLERMAVPQVDDIVRAAKRACYRAAVPMAATA	-|137	-|11.0	-|2	-|8	-|5	-|3	-|2	-	1.335	-	5	-	-	-	1.638	-	5	-	*	-	0.834	-	5	-	-	-	1.829	-	5	-	*	gi|162464059|ref|NP_001104914.1|	100	1e-117	gi|223946975|gb|ACN27571.1|	unknown [Zea mays]	92.8	0	sp|Q6Z1G7|ODPB1_ORYSJ	Pyruvate dehydrogenase E1 component subunit beta-1, mitochondrial OS=Oryza sativa subsp. japonica GN=Os08g0536000 PE=2 SV=1	100	0	Q9ZQY3	Q9ZQY3_MAIZE Pyruvate dehydrogenase E1 beta subunit isoform 1 OS=Zea mays PE=2 SV=1	BMEI0855_2
257	gi|119952178|dbj|BAA96365.3|	oxygen evolving enhancer protein 1 precursor [Bruguiera gymnorhiza]	43861	MAASLQAAATLMQPAKVGVPSRTGLQLRSSQIVSRAFGLEPAAARITCSSQTDFKDLAQKCVDATKIAGFALATSALVVSGAGAEGVPKRLTYDEIQSKTYLEVKGTGTANQCPTIEGGVDSFAFKPGKYNVKKLCLEPTSFTVKAEGVNKNAPPEFQNTKLMTRLTYTLDEIEGPFEVSPDGTVKFVEKDGIDYAAVTVQLPGGERVPFLFTVKQLVATGKPESFSGEYLVPSYRGSSFLDPKGRGGSTGYBNAVALPAGGRGDEEELTKENIKNTSSSTGKITLGVTKSKPETGEVIGVFESLQPSDTDLGAKVPKDVKIQGIWYAQLDS	5007|4607	35.8|35.8	-|-	149|153	65|40	9|9	2|2	0.836	0.985	40	23	-	-	1.198	1.057	38	23	-	-	1.05	1.027	40	23	-	-	0.931	1.055	39	23	-	-	gi|119952178|dbj|BAA96365.3|	100	0	gi|119952178|dbj|BAA96365.3|	oxygen evolving enhancer protein 1 precursor [Bruguiera gymnorhiza]	93.55	5e-10	sp|P83504|PSBO_BRARA	Oxygen-evolving enhancer protein 1, chloroplastic (Fragment) OS=Brassica rapa GN=PSBO PE=1 SV=1	100	0	Q9LRC4	Q9LRC4_BRUGY Oxygen evolving enhancer protein 1 (Precursor) OS=Bruguiera gymnorhiza GN=psbO PE=2 SV=1	-
258	gi|168018579|ref|XP_001761823.1|	predicted protein [Physcomitrella patens subsp. patens] >gi|162686878|gb|EDQ73264.1| predicted protein [Physcomitrella patens subsp. patens]	20461	MRRKRLPMRLVGGELGGTQVAAGTMRDYTTMCRARRERFVVIPFRGCVKARWQSEASERRVSLVREIAPGKPIHRRVSTSGASAPHCSYDLSICDYFVVEIGVLSVVTDSKELEELASCAPIDFRLNMFLLQRICRNKTNPKNQKKRKMV	28|-	9.3|-	-|-	1|-	1|-	1|-	1|-	---	-	-	-	-	-	---	-	-	-	-	-	---	-	-	-	-	-	---	-	-	-	-	-	gi|168018579|ref|XP_001761823.1|	100	8e-84	gi|168018579|ref|XP_001761823.1|	predicted protein [Physcomitrella patens subsp. patens] >gi|162686878|gb|EDQ73264.1| predicted protein [Physcomitrella patens subsp. patens]	-	-	-	-	100	1e-82	A9S670	A9S670_PHYPA Predicted protein OS=Physcomitrella patens subsp. patens GN=PHYPADRAFT_75104 PE=4 SV=1	-
259	gi|4678355|emb|CAB41165.1|	protein-L-isoaspartate(D-aspartate) O-methyltransferase [Arabidopsis thaliana]	28462	MKQFWSPSSINKNKAMVENLQNHGIVTSDEVAKAMEAVDRGVFVTDRSSAYVDSPMSIGYNVTISAPHMHAMCLQLLEKHLKPGMRVLDVGSGTGYLTACFAVMVGTEGRAIGVEHIPELVASSVKNIEASAASPFLKERSLAVHVGDGRQGWAEFAPYDAIHVGAAAPEIPEALIDQLKPGGRLVIPVGNIFQDLQVVDKNSDGSVSIKDETSVRYVPLTSREAQLRGD	57|158	7.4|7.4	2|2	1|4	1|4	1|1	1|1	---	0.562	1	4	-	*	---	1.069	1	4	-	-	---	2.09	1	3	-	*	---	1.274	1	4	-	*	gi|4678355|emb|CAB41165.1|	100	3e-133	gi|4678355|emb|CAB41165.1|	protein-L-isoaspartate(D-aspartate) O-methyltransferase [Arabidopsis thaliana]	99.57	1e-132	sp|Q42539|PIMT_ARATH	Protein-L-isoaspartate O-methyltransferase OS=Arabidopsis thaliana GN=PCM PE=2 SV=3	96.09	2e-126	D7LRL7	D7LRL7_ARALL Protein-L-isoaspartate O-methyltransferase OS=Arabidopsis lyrata subsp. lyrata GN=ARALYDRAFT_906076 PE=3 SV=1	SPAC869.08
260	gi|32351008|gb|AAP76508.1|	cyclophilin, partial [Triticum aestivum] >gi|32401384|gb|AAP80861.1| cyclophilin [Triticum aestivum]	30644	GTDLLSPSLSLSSAAIRSEMAMRAWRRSAAARAPAHLCLWLALVAATLVLAQGKKSNLSEVTHKVYFDIEIDGKPAGRVVMGLFGKAVPKTAENFRALCTGEKGMGNSGKPLHYKGSSFHRIIPSFMIQGGDFTLGDGRGGESIYGTKFGDENFKLKHTGPGYLSMANAGRDTNGSQFFITTVTTSWLDGKHVVFGKVLSGMDVVYKVEAXGKQNGTPKSKVVIADSGEVPLG	76|-	7.7|-	33|-	2|-	2|-	1|-	1|-	---	-	-	-	-	-	---	-	-	-	-	-	---	-	-	-	-	-	---	-	-	-	-	-	gi|32351008|gb|AAP76508.1|	100	1e-92	gi|32351008|gb|AAP76508.1|	cyclophilin, partial [Triticum aestivum] >gi|32401384|gb|AAP80861.1| cyclophilin [Triticum aestivum]	86.52	1e-80	sp|Q8LDP4|CP19D_ARATH	Peptidyl-prolyl cis-trans isomerase CYP19-4 OS=Arabidopsis thaliana GN=CYP19-4 PE=1 SV=2	100	1e-91	Q7X7E8	Q7X7E8_WHEAT Peptidyl-prolyl cis-trans isomerase (Fragment) OS=Triticum aestivum PE=2 SV=1	slr1251
261	gi|15235111|ref|NP_195662.1|	GTP-binding protein-relatedlike protein [Arabidopsis thaliana] >gi|5042168|emb|CAB44687.1| GTP-binding-like protein [Arabidopsis thaliana] >gi|7270936|emb|CAB80615.1| GTP-binding-like protein [Arabidopsis thaliana] >gi|332661681|gb|AEE87081.1| GTP-b	53381	MSTIMQKIKEIEDEMAKTQKNKATSHHLGLLKAKLAKLRRDLLAPPTKGGGGGAGEGFDVTKSGDSRVGLVGFPSVGKSTLLNKLTGTFSEVASYEFTTLTCIPGVITYRGAKIQLLDLPGIIEGAKDGKGRGRQVISTARTCNCILIVLDAIKPITHKRLIEKELEGFGIRLNKEPPNLTFRKKDKGGINLTSTVAVTHLDLDTVKAICGEYRMHNADITLRYDATADDLIDVIEGSRIYMPCIYAVNKIDSITLEELEILDKLPHYCPVSAHLEWNLDGLLDKIWEYLDLTRIYTKPKAMNPDYDDPVILSSKKRTVEDFCIRIHKDMLKQFKYALVWGSSAKHKPQRVGKEHELEDEDVVQIVKKI	-|71	-|3.8	-|27	-|2	-|2	-|1	-|1	-	1.014	-	2	-	-	-	---	-	-	-	-	-	0.564	-	2	-	-	-	---	-	-	-	-	gi|15235111|ref|NP_195662.1|	100	0	gi|15235111|ref|NP_195662.1|	GTP-binding protein-relatedlike protein [Arabidopsis thaliana] >gi|5042168|emb|CAB44687.1| GTP-binding-like protein [Arabidopsis thaliana] >gi|7270936|emb|CAB80615.1| GTP-binding-like protein [Arabidopsis thaliana] >gi|332661681|gb|AEE87081.1| GTP-binding protein-relatedlike protein [Arabidopsis thaliana]	70.73	4e-146	sp|Q54HP3|DRG1_DICDI	Developmentally-regulated GTP-binding protein 1 homolog OS=Dictyostelium discoideum GN=drg1 PE=3 SV=1	100	0	Q9SVA6	Q9SVA6_ARATH GTP-binding protein-relatedlike protein OS=Arabidopsis thaliana GN=AT4g39520 PE=2 SV=1	ECU05g0410i
262	gi|8778533|gb|AAF79541.1|AC023673_29	F21D18.6 [Arabidopsis thaliana]	94047	MSCFGWCGSEDFRNATDTGPRPAHNPAGYNGGHYQRADPPMNQPVIPMQPISVPAIPVDELRDITDNYGSKTLIGEGSYGRVFYGVLKSGGAAAIKKLDSSKQPDQEFLSQISMVSRLRHDNVTALMGYCVDGPLRVLAYEFAPKGSLHDTLHGKKGAKGALRGPVMTWQQRVKIAVGAARGLEYLHEKVSPQVIHRDIKSSNVLLFDDDVAKIGDFDLSDQAPDMAARLHSTRVLGTFGYHAPEYAMTGTLSSKSDVYSFGVVLLELLTGRKPVDHTLPRGQQSLVTWATPKLSEDKVKQCVDARLLGEYPPKAVGKLAAVAALCVQYEANFRPNMSIVLARVRKGCNIMSCFGWCGSEDVRNPADTGPSQAHNSIGSSHISTAPLVFELNRCKGYNG…	-|28	-|1.6	-|37	-|1	-|1	-|1	-|1	-	---	-	-	-	-	-	---	-	-	-	-	-	---	-	-	-	-	-	---	-	-	-	-	gi|8778533|gb|AAF79541.1|AC023673_29	100	0	gi|8778533|gb|AAF79541.1|AC023673_29	F21D18.6 [Arabidopsis thaliana]	77.42	2e-147	sp|Q41328|PTI1_SOLLC	Pto-interacting protein 1 OS=Solanum lycopersicum GN=PTI1 PE=1 SV=2	100	0	Q9LNH4	Q9LNH4_ARATH F21D18.6 OS=Arabidopsis thaliana PE=3 SV=1	MYPU_6850
263	gi|255536947|ref|XP_002509540.1|	ATP binding protein, putative [Ricinus communis] >gi|223549439|gb|EEF50927.1| ATP binding protein, putative [Ricinus communis]	88876	MANLISDQLCFRALALLLCLLLPVLGQNLLSCETTSPDASGYRCNINGSQDHCKTFAILSTNSYFSSLSNLSFYLGFNRFVIAEANGFSADTEFLPKDQPLLIPIDCKCNGNFFRAEVTKTTIKGENFYGIAESLEGLTTCKAIQENNLGVSPWNLADKARLLVPLRCACPSSSQVTLATRFLLSYPVSEGDTISNIAIKFNTTPEAIISANNRSLANFKPENLVPLASLLIPLNREPALGSLAKPREPNSPFRESSIPVINPHKKKSKMWMIGVYIAVTGVVVGATIAIVAAFLIVQLKKKKKQNLSKDGDPELQQLSLSVRTTSEKKVSFEGSQQDLDNQIIDTTPRNRKVLVENYTVEELRKATEDFSSSSLIDGSVYYGRLNGKNLAIKRTKSET…	27|-	2.6|-	-|-	1|-	1|-	1|-	1|-	---	-	-	-	-	-	---	-	-	-	-	-	---	-	-	-	-	-	---	-	-	-	-	-	gi|255536947|ref|XP_002509540.1|	100	0	gi|255536947|ref|XP_002509540.1|	ATP binding protein, putative [Ricinus communis] >gi|223549439|gb|EEF50927.1| ATP binding protein, putative [Ricinus communis]	42.88	9e-127	sp|Q9SGI7|LYK2_ARATH	Protein LYK2 OS=Arabidopsis thaliana GN=LYK2 PE=2 SV=1	100	0	B9RBK6	B9RBK6_RICCO ATP binding protein, putative OS=Ricinus communis GN=RCOM_1677900 PE=4 SV=1	PA0074_1
264	gi|147852316|emb|CAN82224.1|	hypothetical protein VITISV_011872 [Vitis vinifera]	210369	MVSANVSGDLSSEMEVDAFRRLFPLRYHERFLLDSIRPDARPLGRARDTSLALGAVASADGSALAKIGCTQNECQYGGERGLGLCGXGXLQYYLCVGIFGHFWGPGPHGTITNADFTKAVVPYWASVLQGSGMINLKELSLVSGKAAWMAYLDIYCLDADGSLFDAALLAAVAAFSHLRIPVVSLNEEGRVVVVSEENEEGKSEKEPVNKGKRKLTLSSLPFSLTCILHKNYILADPTAEEESIMETLVTVVLDSSGQLVSLYKPGGPVLAYASAVQDCIALTRQRVKELKSILNEAISDMEKTNQANSKSCLRVKCAAIGNGLFTQTTPEVRRIVPDNDHGLPTVKVVYVVLEAQYQSALTAAVQTLNSKARYASFQVVGYLVEELRDEATYKTFCKD…	-|211	-|1.8	-|12	-|5	-|5	-|2	-|2	-	1.501	-	4	-	-	-	1.423	-	3	-	-	-	1.003	-	4	-	-	-	1.434	-	3	-	-	gi|147852316|emb|CAN82224.1|	100	0	gi|147852316|emb|CAN82224.1|	hypothetical protein VITISV_011872 [Vitis vinifera]	85.74	0	sp|B8ANF1|CHLH_ORYSI	Magnesium-chelatase subunit ChlH, chloroplastic OS=Oryza sativa subsp. indica GN=CHLH PE=3 SV=1	100	0	A5AIZ9	A5AIZ9_VITVI Putative uncharacterized protein OS=Vitis vinifera GN=VITISV_011872 PE=4 SV=1	all4365
265	gi|149938958|gb|ABR45724.1|	GDH2 [Actinidia chinensis]	52748	MNALAATNRNFRHAARILGLDSKLEKSLLIPFREIKVECTIPKDDGTLVSYVGFRVQHDNSRGPMKGGIRYHPEVDPDEVNALAQLMTWKTAVADIPYGGAKGGIGCTPKDLSKSEWERLTRVFTQKIHDLIGVNMDVPAPDMGTNAQTMAWILDEYSKFHGYSPAIVTGKPIDLGGSLGREAATGRGVVYATEALLAEHGKSIKDLTFVIQGFGNVGSWAARLIHERGGKVVAVSDITGAVKNPNGIDIQSLLNHKEATGSLNNFDGGDAMDPNELLIEDCDVLIPCALGGVLNRENAGKVRAKFIIEAANHPTDPEADEILSKKGVIVLPDIYANSGGVTVSYFEWVQNIQGFMWDEEKVNKELHRYMTRAFGNIKNMCQTHNCSLRMGAFTLGVNR…	62|-	2.9|-	-|-	1|-	1|-	1|-	1|-	---	-	1	-	-	-	---	-	1	-	-	-	---	-	1	-	-	-	---	-	1	-	-	-	gi|149938958|gb|ABR45724.1|	100	0	gi|149938958|gb|ABR45724.1|	GDH2 [Actinidia chinensis]	89.05	0	sp|O04937|DHEA_NICPL	Glutamate dehydrogenase A OS=Nicotiana plumbaginifolia GN=GDHA PE=2 SV=1	100	0	A7YVW4	A7YVW4_ACTCH Glutamate dehydrogenase OS=Actinidia chinensis GN=GDH2 PE=2 SV=1	TM1015
266	gi|168019768|ref|XP_001762416.1|	predicted protein [Physcomitrella patens subsp. patens] >gi|162686494|gb|EDQ72883.1| predicted protein [Physcomitrella patens subsp. patens]	19890	MAQAKTVKDVSSHEFVRNYAAHLKRSGKIEVPVWADLVKTATFKELAPYDADWYYIRAASMARKIYLRQGVGVGAFRKIYGGRKSNGVRPSHFAKSSGSIARHCLKQLEALDIVEKDPQGGRRITSNGQRDLDQVAGRIAVAAA	27|22	6.2|6.2	-|-	2|1	2|1	1|1	1|1	---	---	-	-	-	-	---	---	-	-	-	-	---	---	-	-	-	-	---	---	-	-	-	-	gi|168019768|ref|XP_001762416.1|	100	1e-79	gi|168019768|ref|XP_001762416.1|	predicted protein [Physcomitrella patens subsp. patens] >gi|162686494|gb|EDQ72883.1| predicted protein [Physcomitrella patens subsp. patens]	76.43	2e-59	sp|Q9LF30|RS192_ARATH	40S ribosomal protein S19-2 OS=Arabidopsis thaliana GN=RPS19B PE=2 SV=1	100	1e-78	A9S7Q3	A9S7Q3_PHYPA Predicted protein OS=Physcomitrella patens subsp. patens GN=PHYPADRAFT_163322 PE=4 SV=1	SPBC649.02
267	gi|118489459|gb|ABK96532.1|	unknown [Populus trichocarpa x Populus deltoides]	32050	MKHLKLQKNKLVVVEYAASHSYHSSQIYPFMVELSRTCNDVDFLLVMADESGKTRELCKREKIEKVPHFSFYKSLEKIHEEKGITQDKLMGDVLYYGDNHSAVVQLHLREDVEKLIDDHKADHKLIVLDVGLKHCGPCVKVYPTVIKLSRQMSDTVVFARMNGDENDSCMQFLKDMDVVEVPTFLFIRDGKICGRYVGSGKGELIGEILRYQGVRVTY	152|-	10.6|-	2|-	8|-	5|-	2|-	1|-	---	-	-	-	-	-	---	-	1	-	-	-	---	-	1	-	-	-	---	-	1	-	-	-	gi|118489459|gb|ABK96532.1|	100	8e-125	gi|118489459|gb|ABK96532.1|	unknown [Populus trichocarpa x Populus deltoides]	82.79	2e-102	sp|Q9SGS4|CDSP_ARATH	Thioredoxin-like protein CDSP32, chloroplastic OS=Arabidopsis thaliana GN=CDSP32 PE=1 SV=1	100	8e-124	A9PJH9	A9PJH9_9ROSI Putative uncharacterized protein OS=Populus trichocarpa x Populus deltoides PE=2 SV=1	AF2144
268	gi|190364827|gb|ACE77057.1|	plasma membrane proton pump [Cucumis sativus]	125050	MGNDTALTLEEIKNETVDLEKIPIEEVFEQLKCTREGLSSQEGENRLQIFGPNKLEEKKESKILKFLGFMWNPLSWVMEAAAIMAIALANGGNRGPDWQDFVGIVCLLVINSTISFIEENNAGNAAAALMAGLAPKTKVLRDGKWCEQDASILVPGDVISVKLGDIIPADARLLEGDPLKVDQSALTGESLPVTKNPGDEVFSGSTCKQGEIEAIVIATGVHTFFGKAAHLVDSTNQVGHFQKVLTAIGNFCICSIAIGMLIEILVMYPIQHRAYRDGIDNLLVLLIGGIPIAMPTVLSVTMAIGSHKLSQQGAITKRMTAIEEMAGMDVLCSDKTGTLTLNKLSVDKNLIEVFVKGVDKEHVILLAARASRTENQDAIDAAMVGMLADPKEARAGIRE…	-|233	-|8.3	-|1	-|12	-|1	-|6	-|1	-	---	-	1	-	-	-	---	-	-	-	-	-	---	-	1	-	-	-	---	-	-	-	-	gi|190364827|gb|ACE77057.1|	100	0	gi|190364827|gb|ACE77057.1|	plasma membrane proton pump [Cucumis sativus]	89.25	0	sp|Q03194|PMA4_NICPL	Plasma membrane ATPase 4 OS=Nicotiana plumbaginifolia GN=PMA4 PE=2 SV=1	100	0	B3VDR8	B3VDR8_CUCSA Plasma membrane proton pump OS=Cucumis sativus GN=HA2 PE=2 SV=1	MA1678
269	gi|460384409|ref|XP_004237904.1|	PREDICTED: uncharacterized protein LOC101252482 [Solanum lycopersicum]	31571	MVSFHKISQIPKQRNVMEDLCKKRKWEDDQLSCDEIKPQIKAKKVTTLFGTQLNPETPLPLEWQRCLDIKSGHIYFYNTRTQKRTSSDPRLSDPEPPQPTHQVHMSLDLELNLLPSCQSPEKTNQIDDNFVSNSSNHLMKKDNCESKGLINRSPSWLTFDVDQQEMVTAVCKKCHMLVMMSKSSPTCPNCKFVHPLDETTPTLFKKRLSSF	23|-	4.7|-	-|-	1|-	1|-	1|-	1|-	---	-	-	-	-	-	---	-	-	-	-	-	---	-	-	-	-	-	---	-	-	-	-	-	gi|460384409|ref|XP_004237904.1|	100	5e-121	gi|460384409|ref|XP_004237904.1|	PREDICTED: uncharacterized protein LOC101252482 [Solanum lycopersicum]	-	-	-	-	54.75	1e-47	E0CRK2	E0CRK2_VITVI Putative uncharacterized protein OS=Vitis vinifera GN=VIT_18s0001g05580 PE=4 SV=1	-
270	gi|224073126|ref|XP_002303984.1|	predicted protein [Populus trichocarpa] >gi|222841416|gb|EEE78963.1| predicted protein [Populus trichocarpa]	47629	MSLAPSRYPALYSSSPLPTSSVQAKQIPLLFSQNTHFLSKNYSFLSTSTAFSNTLLLKPSNSILKASETESQTSKSAESGSGGEGEGEGEGEEKYEEYEVEIEQPYGIKFAKGRDGSTYIDAIAPGGSADKNGKFSVGDKVIATSAVFGTEIWPAAEYGRTMYTIRQRIGPLFMKMQKRYGNMDYTGELTEKEIIRAERNSGVISNRVREIQMQNYLRKKEQKEQREKDLREGLQLYKNAKYEEALEKFESMLGSKPDPTEAAVASYNVACCYSKLNQLQAGLSALEDAMKAGFEDFKRIRTDPDLSNLRTAEGFEPLMKRFDESFINENAINAIKSLFGFNKK	-|41	-|7.0	-|2	-|3	-|1	-|2	-|1	-	---	-	-	-	-	-	---	-	-	-	-	-	---	-	-	-	-	-	---	-	-	-	-	gi|224073126|ref|XP_002303984.1|	100	1e-172	gi|224073126|ref|XP_002303984.1|	predicted protein [Populus trichocarpa] >gi|222841416|gb|EEE78963.1| predicted protein [Populus trichocarpa]	-	-	-	-	100	1e-171	B9GXY1	B9GXY1_POPTR Predicted protein OS=Populus trichocarpa GN=POPTRDRAFT_1074704 PE=4 SV=1	-
271	gi|587562|emb|CAA56520.1|	mitochondrial processing peptidase [Solanum tuberosum]	61930	MYRATSSRLRALKVRGTNRVLARFLCSTAVATKPSGGLFSWLTGGGSDSLPPLDFPLKDIQLPPPLPDYVEPGKTKITTLTNGLKIASEISASPAASIGLYVDCGSIYEAPASYGATHLLERMAFKSTLNRSHLRIVREVEAIGGNVTAAASREHLIYTYDALKTYVPQMVELLVDSVRNPAFLDWEVSEQLEKVKSEIDEYTKNPQHLLLEAVHSAGYSGPYGNSLAATEATVNRLNSTVLEEFVAENYTAPRIVLAASGVEHEELLKVAEPLLSDLPKVPRAEEPTPVYVGGDYRRQADSGMTHFALAFEVPGGWLKEKDAMTLTVLQMLMGGGGSFSAGGPGKGMYSRLYLRVLNAYPQIHAFSAFSSIYNNTGLFGIQAATTSDFAPRAIEVAVK…	-|33	-|2.8	-|-	-|2	-|2	-|1	-|1	-	---	-	-	-	-	-	---	-	-	-	-	-	---	-	-	-	-	-	---	-	-	-	-	gi|587562|emb|CAA56520.1|	100	0	gi|587562|emb|CAA56520.1|	mitochondrial processing peptidase [Solanum tuberosum]	84.72	0	sp|P29677|MPPA_SOLTU	Mitochondrial-processing peptidase subunit alpha OS=Solanum tuberosum GN=MPP PE=1 SV=1	100	0	Q41440	Q41440_SOLTU Mitochondrial processing peptidase OS=Solanum tuberosum GN=MPP PE=2 SV=1	YHR024c
272	gi|460371279|ref|XP_004231468.1|	PREDICTED: E3 ubiquitin ligase BIG BROTHER-related-like [Solanum lycopersicum]	36435	MENSESNNNNNYNNEAAKTTVVDDNSHQPGNPNGSDGDASLQVNANGEPDAALHQPGASRRTPFTDLSQVDADLALARTLQDQERAYMMLSMNDDGIDYGSWDAGNYGHDEDEDEDFDDPSEEEDDGSDVGEDDEDAFDVHAHDEASEDENQGVELDPSAFSSDEAYARALQDAEEREMAARLLALAGINEMYVGQRQDEEDRGINSQDAWEDVDPDELSYEELIALGDVVGTESRGLSADTIASLPSVNYKTQTASEGTTDSCVICRLDYEDGEKLTVLSCKHTYHSECLNNWLQINKVCPICSTEVSTSGNS	38|120	5.4|5.4	-|-	1|3	1|3	1|1	1|1	---	0.005	-	2	-	-	---	---	-	1	-	-	---	188.02	-	2	-	-	---	---	-	1	-	-	gi|460371279|ref|XP_004231468.1|	100	5e-146	gi|460371279|ref|XP_004231468.1|	PREDICTED: E3 ubiquitin ligase BIG BROTHER-related-like [Solanum lycopersicum]	61.09	1e-68	sp|Q9LT17|BBR_ARATH	E3 ubiquitin ligase BIG BROTHER-related OS=Arabidopsis thaliana GN=BBR PE=2 SV=1	84.85	2e-07	I1IS84	I1IS84_BRADI Uncharacterized protein OS=Brachypodium distachyon GN=BRADI4G36320 PE=4 SV=1	SPAC57A7.09
273	gi|6630450|gb|AAF19538.1|AC007190_6	F23N19.10 [Arabidopsis thaliana]	86181	MADEAKAKGNAAFSSGDFNSAVNHFTDAINLTPTNHVLFSNRSAAHASLNHYDEALSDAKKTVELKPDWGKGYSRLGAAHLGLNQFDEAVEAYSKGLEIDPSNEGLKSGLADAKASASRSRASAPNPFGDAFQGPEMWSKLTADPSTRGLLKQPDFVNMMKEIQRNPSNLNLYLQDQRVMQALGVLLNIQIRTQQAGDDMEIGEEEMAVPSRKEPEVEKKRKPEPEPEPEPEFGEEKQKKLKAQKEKELGNAAYKKKDFETAIQHYSTAMEIDDEDISYITNRAAVHLEMGKYDECIKDCDKAVERGRELRSDYKMVAKALTRKGTALGKMAKVSKDYEPVIQTYQKALTEHRNPETLKRLNEAERAKKELEQQEYYDPNIGDEEREKGNDFFKEQKYP…	-|18	-|2.9	-|5	-|1	-|1	-|1	-|1	-	---	-	-	-	-	-	---	-	-	-	-	-	---	-	-	-	-	-	---	-	-	-	-	gi|6630450|gb|AAF19538.1|AC007190_6	100	0	gi|6630450|gb|AAF19538.1|AC007190_6	F23N19.10 [Arabidopsis thaliana]	60.43	0	sp|Q43468|STIP_SOYBN	Heat shock protein STI OS=Glycine max GN=STI PE=2 SV=1	100	0	Q9SI76	Q9SI76_ARATH F23N19.10 OS=Arabidopsis thaliana PE=4 SV=1	SPAC17G6.19c
274	gi|19970|emb|CAA47374.1|	prb-1b [Nicotiana tabacum]	21723	MGYSTTLVACFITFAILFHSSQAQNSPQDYLNPHNAARRQVGVGPMTWDNRLAAFAQNYANQRAGDCRMQHSGGPYGENLAAAYPQLHAAGAVKMWVDEKQFYNYNSNTCAAGNVCGHYTQVVWRNSVRLGCARVRCNNGWYFITCNYDPPGNWRGQRPYGDLEEQHPFDSKLELPTDV	32|-	6.7|-	4|-	1|-	1|-	1|-	1|-	---	-	-	-	-	-	---	-	-	-	-	-	---	-	-	-	-	-	---	-	-	-	-	-	gi|19970|emb|CAA47374.1|	100	3e-104	gi|19970|emb|CAA47374.1|	prb-1b [Nicotiana tabacum]	86.59	2e-88	sp|P11670|PRB1_TOBAC	Basic form of pathogenesis-related protein 1 OS=Nicotiana tabacum PE=3 SV=1	100	2e-103	Q04106	Q04106_TOBAC Prb-1b OS=Nicotiana tabacum GN=PRB-1B PE=4 SV=1	YJL078c_1
275	gi|132270|sp|P15252.2|REF_HEVBR	RecName: Full=Rubber elongation factor protein; Short=REF; AltName: Allergen=Hev b 1 >gi|18839|emb|CAA39880.1| rubber elongation factor [Hevea brasiliensis] >gi|20563024|dbj|BAB92025.1| rubber elongation factor [Hevea brasiliensis] >gi|21689593|gb|A	17451	MAEDEDNQQGQGEGLKYLGFVQDAATYAVTTFSNVYLFAKDKSGPLQPGVDIIEGPVKNVAVPLYNRFSYIPNGALKFVDSTVVASVTIIDRSLPPIVKDASIQVVSAIRAAPEAARSLASSLPGQTKILAKVFYGEN	425|240	30.4|30.4	-|-	19|14	19|14	3|3	3|3	4.978	3.415	8	5	*	*	0.892	1.059	10	4	-	-	0.808	1.108	10	4	*	-	3.372	3.3	8	4	*	*	gi|132270|sp|P15252.2|REF_HEVBR	100	5e-07	gi|51557080|gb|AAU06310.1|	rubber elongation factor [Hevea brasiliensis]	100	2e-74	sp|P15252|REF_HEVBR	Rubber elongation factor protein OS=Hevea brasiliensis PE=1 SV=2	100	2e-08	Q94JL6	Q94JL6_HEVBR Rubber elongation factor (Fragment) OS=Hevea brasiliensis GN=ref PE=4 SV=1	-
276	gi|2765356|emb|CAA74179.1|	chlorophyll a/b-binding protein [Beta vulgaris subsp. vulgaris]	33082	MATSTIQQSAFAGQTILKPQNELVRKFGGNGGRASMRRTVKSAPQSIWYGPDRPKYLGPFSEQTPSYLTGEFPGDYGWDTAGLSADPETFAKNRELEVIHSRWAMLGALGCVFPEILSKNGVKFGEAVWFKAGSQIFQEGGLDYLGNPNLIHAQSILAIWASQVVLMGLIEGYRVGGGPLGEGLDKLYPGGAFDPLGLADDPEAFAELKVKELKNGRLAMFSMFGFFVQAIVTGKGPIENLSDHLADPVANNAWAFATNFVPGK	656|746	21.6|21.6	-|-	27|26	12|16	4|4	2|2	0.862	1.17	5	9	-	-	1.23	1.35	6	8	-	*	2.136	1.878	5	9	*	*	2.109	2.431	5	9	*	*	gi|2765356|emb|CAA74179.1|	100	3e-152	gi|2765356|emb|CAA74179.1|	chlorophyll a/b-binding protein [Beta vulgaris subsp. vulgaris]	94.44	2e-129	sp|P14279|CB25_SOLLC	Chlorophyll a-b binding protein 5, chloroplastic (Fragment) OS=Solanum lycopersicum GN=CAB5 PE=2 SV=1	100	3e-151	O49812	O49812_BETVU Chlorophyll a/b-binding protein OS=Beta vulgaris subsp. vulgaris PE=2 SV=1	-
277	gi|255576447|ref|XP_002529115.1|	uv excision repair protein rad23, putative [Ricinus communis] >gi|223531394|gb|EEF33228.1| uv excision repair protein rad23, putative [Ricinus communis]	47247	MKIFVKTLKGTTFDVEVKPEDTIADVKKSIETTQGADVYPAGQQMLIYQGKVLKDNTTIDENKVAENSFVVIMLTKNKSSTGEGSTASTASTTKAPQTIIPATIAPPAPVPTSALPAPAPAPTPAAAPAPAAAPAPAPTPAAAPAPAPAPSAIAAQQGDVYGQAASNLVAGNNLEGAIQQILDMGGGTWDRDTVVRALRAAYNNPERAVEYLYSGIPEQAEVPPVAPVSLSGQAANQPAQPQQPAQPAAVPSGGPNANPLDLFPQGLPNMGSGGAGAGAGAGTLDFLRNSQQFQALRAMVQANPQILQPMLQELGKQNPNLVRLIQEHQTDFLRLINEPVEGGEGNIMGQLAAAMPQAVTVTPEEREAIERLEAMGFDRGLVLEVFFACNKNEELAANY…	-|42	-|3.2	-|3	-|1	-|1	-|1	-|1	-	---	-	-	-	-	-	---	-	-	-	-	-	---	-	-	-	-	-	---	-	-	-	-	gi|255576447|ref|XP_002529115.1|	100	1e-37	gi|255576447|ref|XP_002529115.1|	uv excision repair protein rad23, putative [Ricinus communis] >gi|223531394|gb|EEF33228.1| uv excision repair protein rad23, putative [Ricinus communis]	77.87	4e-100	sp|Q84L30|RD23D_ARATH	Putative DNA repair protein RAD23-4 OS=Arabidopsis thaliana GN=RAD23-4 PE=2 SV=2	100	1e-117	B9SSZ6	B9SSZ6_RICCO Uv excision repair protein rad23, putative OS=Ricinus communis GN=RCOM_0352420 PE=4 SV=1	SPBC2D10.12
278	gi|75110834|sp|Q5W915.1|USP_PEA	RecName: Full=UDP-sugar pyrophospharylase; Short=PsUSP >gi|54650280|dbj|BAD66876.1| UDP-sugar pyrophospharylase [Pisum sativum]	79140	MASSLGDNFNLLSPQQRELVKMLLDNGQDHLFRDWPNPGVDDDEKKAFFDQLVLLDSSYPGGLVAYINNAKRLLADSKAGNNPFDGFTPSVPTGETLKFGDENFNKYEEAGVREARRAAFVLVAGGLGERLGYNGIKVALPAETTTGTCFLQHYIESILALQEASSEGEGQTHIPFVIMTSDDTHGRTLDLLESNSYFGMQPTQVTLLKQEKVACLEDNDARLALDPQNRYRVQTKPHGHGDVHSLLHSSGILKVWYNAGLKWVLFFQDTNGLLFKAIPSALGVSSTKQYHVNSLAVPRKAKEAIGGITRLTHSDGRSMVINVEYNQLDPLLRASGYPDGDVNSETGYSPFPGNINQLILELGPYIEELAKTGGAIQEFVNPKYKDASKTSFKSSTRLE…	-|40	-|2.2	-|9	-|1	-|1	-|1	-|1	-	---	-	-	-	-	-	---	-	-	-	-	-	---	-	-	-	-	-	---	-	-	-	-	gi|75110834|sp|Q5W915.1|USP_PEA	100	0	gi|75110834|sp|Q5W915.1|USP_PEA	RecName: Full=UDP-sugar pyrophospharylase; Short=PsUSP >gi|54650280|dbj|BAD66876.1| UDP-sugar pyrophospharylase [Pisum sativum]	100	0	sp|Q5W915|USP_PEA	UDP-sugar pyrophospharylase OS=Pisum sativum GN=USP PE=1 SV=1	91.64	0	Q2PEQ7	Q2PEQ7_TRIPR Putative uncharacterized protein OS=Trifolium pratense PE=2 SV=1	SA1974
279	gi|159483859|ref|XP_001699978.1|	hypothetical protein CHLREDRAFT_141821 [Chlamydomonas reinhardtii] >gi|158281920|gb|EDP07674.1| predicted protein [Chlamydomonas reinhardtii]	50421	MRPALAHVCPSQVSAALVKIGGHIANPDKFVKAAGLLRQLIDGGAAGRQHRELLFEVIKAAFSDLDAASDPGLRRDYMRLCHSLDKRQAAEPGLFSRPQRAQLEVYRVLGFTQNEMHTDDSFVFNKVLGRIKEAVEALPPADEADEEAQAELQAGDDSDSEPGAEEEEAGGGSGGGGNKRPEVKQEQDQEGGAGAAGSDEVPAAVGPDAAAPQLPQEPEAREEPGAGAGSEEDVEADPFGLDSLLPAPKKKPAPAPPPPPPPPAAAQAAAAAARGGPGEEGAGGGKGRSKVWSAAQCLVMRRQAFVECLITAKSLHKLQWARTSVELLVEHFNKHRDRFTGQQQLAIDEMVRFVRDSRKARAAGPSSKELNRDTTSFERARSEWSRAKVSARGKVGAQG…	-|18	-|2.5	-|-	-|1	-|1	-|1	-|1	-	---	-	-	-	-	-	---	-	-	-	-	-	---	-	-	-	-	-	---	-	-	-	-	gi|159483859|ref|XP_001699978.1|	100	3e-150	gi|159483859|ref|XP_001699978.1|	hypothetical protein CHLREDRAFT_141821 [Chlamydomonas reinhardtii] >gi|158281920|gb|EDP07674.1| predicted protein [Chlamydomonas reinhardtii]	-	-	-	-	100	3e-149	A8I462	A8I462_CHLRE Predicted protein OS=Chlamydomonas reinhardtii GN=CHLREDRAFT_141821 PE=4 SV=1	-
280	gi|20020|emb|CAA44226.1|	ribosomal protein L12-1a [Nicotiana tabacum]	25785	MASTLSTITLRSPSPSTASSTHASIPFPKKALEFPIRTPKLHHRRATFLRPLAAVEAPEKVVQLGDEISNLTLADAQKLVEYLQDKLGVTAASFAPAAVAAAPGAAAEAPAVVEEKTEFDVVIDEVPSNARIATIKAVRALTSLALKEAKELIEGLPKKFKEGVSKDEAEDAKKQLEEAGAKVSIANLNFW	590|572	21.5|25.7	4|4	30|28	30|27	3|4	3|3	1.39	1.249	21	20	-	-	1.83	1.491	17	19	*	-	0.863	1.095	22	20	-	-	2.144	1.939	18	19	*	*	gi|20020|emb|CAA44226.1|	100	2e-77	gi|20020|emb|CAA44226.1|	ribosomal protein L12-1a [Nicotiana tabacum]	100	1e-73	sp|P24929|RK12_TOBAC	50S ribosomal protein L12, chloroplastic OS=Nicotiana tabacum GN=RPL12 PE=1 SV=1	97.52	2e-58	Q0ZII1	Q0ZII1_NICPL Joka20 (Fragment) OS=Nicotiana plumbaginifolia PE=2 SV=1	alr5303
281	gi|21633405|gb|AAM52177.1|	ATP synthase beta subunit [Dipteropeltis poranoides]	59100	MRINPTTSSXEVFAVEKKNIGRIVQIIGPVLDVAFPPGKMPNIYNALVVQGRDNEQTNVTCEVQQLLGNNRVRAVAMSDTDGLMRGMEVIDTGAPISVPVGGATLGRIFNVLGEPVDNLGPVDTKTTSPIHRSAPAFIQLDTKLSIFETGIKVVDLLAPYRRGGKIGLFGGAGVGKTVLIMELINNIAKAHGGVSVFGGVGERTREGNDLYMEMKESGVIDEENIAESKVALVYGQMNEPPGARMRVGLTALTMAEYFRDVNEQDVLLFIDNIFRFVQAGSEVSALLGRMPSAVGYQPTLSTEMGSLQERITSTKEGSITSIQAVYVPADDLTDPAPATTFAHLDATTVLSRGLAAKGIYPAVDPLDSTSTMLQPRIVGEEHYETAQRVKQTLQRYKEL…	6955|5138	52.9|53.1	-|-	237|192	2|3	18|17	1|1	2.524	2.332	2	3	*	*	---	0.673	1	3	-	-	1.165	0.759	2	3	-	-	---	0.995	1	3	-	-	gi|21633405|gb|AAM52177.1|	100	0	gi|21633405|gb|AAM52177.1|	ATP synthase beta subunit [Dipteropeltis poranoides]	97.76	0	sp|Q7H8L9|ATPB_IPOOB	ATP synthase subunit beta, chloroplastic OS=Ipomoea obscura GN=atpB PE=3 SV=1	100	0	Q8MBI6	Q8MBI6_9ASTE ATP synthase subunit beta, chloroplastic OS=Dipteropeltis poranoides GN=atpB PE=3 SV=1	all5039
282	gi|21684925|emb|CAD11589.1|	ATP synthase beta subunit [Leersia oryzoides]	60490	MRTNPTTSRPGVSTIEEKSTGRIDQIIGPVLDVTFPPGKLPYIYNALVVKSRDTDGKQINVTCEVQQLLGNNRVRAVAMSATDGLMRGMEVIDTGAPLSVPVGGATLGRIFNVLGEPVDNLGPVDTSATFPIHRSAPAFIELDTKLSIFETGIKVVDLLAPYRRGGKIGLFGGAGVGKTVLIMELINNIAKAHGGVSVFGGVGERTREGNDLYMEMKESGVINEKNLEESKVALVYGQMNEPPGARMRVGLTALTMAEYFRDVNKQDVLLFIDNIFRFVQAGSEVSALLGRMPSAVGYQPTLSTEMGSLQERITSTKXGSITSIQAVYVPADDLTDPAPATTFAHLDATTVLSRGLAAKGIYPAVDPLDSTSTMLQPRIVGEEHYETAQRVKQTLQRYK…	-|4980	-|45.9	-|-	-|194	-|11	-|16	-|2	-	1.012	-	10	-	-	-	0.866	-	10	-	-	-	1.216	-	10	-	*	-	0.791	-	9	-	-	gi|21684925|emb|CAD11589.1|	100	0	gi|21684925|emb|CAD11589.1|	ATP synthase beta subunit [Leersia oryzoides]	97.79	0	sp|Q6ENG7|ATPB_ORYNI	ATP synthase subunit beta, chloroplastic OS=Oryza nivara GN=atpB PE=3 SV=1	100	0	Q8M9E9	Q8M9E9_9ORYZ ATP synthase subunit beta (Fragment) OS=Leersia oryzoides GN=atpB PE=3 SV=1	all5039
283	gi|168003756|ref|XP_001754578.1|	ferric reductase like transmembrane component [Physcomitrella patens subsp. patens] >gi|162694199|gb|EDQ80548.1| ferric reductase like transmembrane component [Physcomitrella patens subsp. patens]	82532	MFVLYSMPVIVLTIIATAYLAIKQQYPSDLRASWFRRFCRLLWTRPLVVNEFLGVLNGFDLLVILSTIFVVLWMVLNELLPQLRSLHGNPMAGLLKWKPIGVVLGRVAVLPISLLLIPVSRSSPILRAIDIPFEQAVKYHIWLGHLTMAMLLGHVSIFIGIFAYKHHMVKLVTWPPTGVSYLAGLIAFVAGSLMWITALPLIRRRFFNAFYYTHQLYILFFAFLVYHVGVTTAGYYIGGVFLYLLDRFFRVHQSRKKMLISSAKILSNDVVELKIPKLPSMEHSALSFIFINIPSISPLEWHPFSVASSPLDETAITLYVKPFGITSWTQHLHTLVTRSTKKNGSGCPFAQKFSMEGPYGHESNFFLRYKTLLLVAGGIGITPFLAMISDILHRYEAAH…	-|29	-|2.3	-|-	-|1	-|1	-|1	-|1	-	---	-	-	-	-	-	---	-	-	-	-	-	---	-	-	-	-	-	---	-	-	-	-	gi|168003756|ref|XP_001754578.1|	100	0	gi|168003756|ref|XP_001754578.1|	ferric reductase like transmembrane component [Physcomitrella patens subsp. patens] >gi|162694199|gb|EDQ80548.1| ferric reductase like transmembrane component [Physcomitrella patens subsp. patens]	33.57	2e-88	sp|Q8RWS6|FRO6_ARATH	Ferric reduction oxidase 6 OS=Arabidopsis thaliana GN=FRO6 PE=2 SV=1	100	0	A9RKK9	A9RKK9_PHYPA Ferric reductase like transmembrane component OS=Physcomitrella patens subsp. patens GN=PHYPADRAFT_115851 PE=4 SV=1	-
284	gi|100284|pir||A39267	superoxide dismutase (EC 1.15.1.1) (Fe) - curled-leaved tobacco	30054	MTMITNSSSVPGDPLESTCRGGGGAKFELQPPPYPMDALEPHMSSRTFEFHWGKHHRAYVDNLNKQIDGTELDGKTLEDIILVTYNKGAPLPAFNNAAQAWNHQFFWESMKPNGGGEPSGELLELINRDFGSYDAFVKEFKAAAATQFGSGWAWLAYKPEEKKLALVKTPNAENPLVLGYTPLLTIDVWEHAYYLDFQNRRPDYISIFMEKLVSWEAVSSRLKAATA	156|117	18.9|14.1	1|1	8|8	4|6	3|3	2|2	2.491	3.567	2	2	-	-	1.682	1.652	2	2	-	-	0.712	0.72	2	2	-	-	2.684	4.031	2	2	-	*	gi|100284|pir||A39267	100	4e-108	gi|134642|sp|P22302.1|SODF_NICPL	RecName: Full=Superoxide dismutase [Fe], chloroplastic >gi|170235|gb|AAA34074.1| Fe-superoxide dismutase, partial [Nicotiana plumbaginifolia]	100	1e-108	sp|P22302|SODF_NICPL	Superoxide dismutase [Fe], chloroplastic (Fragment) OS=Nicotiana plumbaginifolia GN=SODB PE=2 SV=1	96.9	3e-59	C0JPM8	C0JPM8_SOLNI Superoxide dismutase (Fragment) OS=Solanum nigrum PE=2 SV=2	slr1516
285	gi|356550547|ref|XP_003543647.1|	PREDICTED: 97 kDa heat shock protein-like [Glycine max]	118100	MSVVGFDFGNESCIVAVARQRGIDVVLNDESKRETPAIVCFGDKQRFLGTAGAASTMMNPKNSISQIKRLIGRQFADPELQQDIKTFPFVVTEGPDGYPLIHARYLGESRTFTPTQVFGMMLSNLKEIAEKNLNAAVVDCCIGIPLYFTDLQRRAVLDAATIAGLHPLRLFHETTATALAYGIYKTDLPENDQLNVAFVDVGHASMQVCIAGFKKGQLKVLSQSYDRSLGGRDFDEVLFNHFAAKFKEEYKIDVFQNARACLRLRAACEKLKKVLSANPEAPLNIECLMDEKDVRGFIKRDEFEQLSLPILERVKGPLEKALAEAGLTVENVHMVEVVGSGSRVPAINKILTEFFKKEPRRTMNASECVARGCALQCAILSPTFKVREFQVNESFPFSI…	120|95	4.8|4.2	-|-	6|5	6|5	3|3	3|3	0.676	0.628	3	3	-	-	1.254	0.812	2	3	-	-	0.909	0.795	3	3	-	-	0.769	0.75	2	3	-	-	gi|356550547|ref|XP_003543647.1|	100	0	gi|356550547|ref|XP_003543647.1|	PREDICTED: 97 kDa heat shock protein-like [Glycine max]	81.08	0	sp|Q9S7C0|HSP7O_ARATH	Heat shock 70 kDa protein 14 OS=Arabidopsis thaliana GN=HSP70-14 PE=1 SV=1	100	0	I1M5L7	I1M5L7_SOYBN Uncharacterized protein OS=Glycine max PE=4 SV=1	YBR169c
286	gi|124014020|gb|ABM88259.1|	lipoxygenase [Phaseolus vulgaris]	120477	MPVKQIHGSNSGASCLIPQRPCLRGIPHPSFQLWSRPSSFPSQRKLKRVSHGCRNDVTKIKAVAAKTAEKKLVKVKAIISVQPTVGGIFSERALERGLDDIKDLLGQSLLLELVSAELDPKTQLEKKTLEHFAHRTHQSSKEIRYEAEFEVPESFGEVGALLVENEHRREMFVREIVLDGFELGPVRFACESWLHSKHDNPQKRIFFPNKSYLPSETPEGVKRLREEELLTLRGNGQGERQSFERVYDYDVYNDLGDPDENSDLRRPVLGGPEHPYPRRCRTGRPRTKKDPLSEKRSSTVYVPRDECFSEVKQLTFNTKSLASALKALIPALKTVIVDKNLGFPVFSEIDALFDEGLPLPSRNVKISNLLPRLVSYIKDKGEDILRFNPPATMERDRFF…	47|25	1.6|1.6	2|2	1|1	1|1	1|1	1|1	---	---	1	-	-	-	---	---	1	-	-	-	---	---	1	-	-	-	---	---	1	-	-	-	gi|124014020|gb|ABM88259.1|	100	0	gi|124014020|gb|ABM88259.1|	lipoxygenase [Phaseolus vulgaris]	65.3	0	sp|O24370|LOX21_SOLTU	Linoleate 13S-lipoxygenase 2-1, chloroplastic OS=Solanum tuberosum GN=LOX2.1 PE=1 SV=1	100	0	A2TEX8	A2TEX8_PHAVU Lipoxygenase OS=Phaseolus vulgaris PE=2 SV=1	-
287	gi|470132333|ref|XP_004302038.1|	PREDICTED: probable ribose-5-phosphate isomerase-like [Fragaria vesca subsp. vesca]	35989	MASSLSLISPHSAILRTPKTLNLRTHRPLCIKARTVPALTQDDLKKLAADKAVEYVKSGMVLGLGTGSTAAFVVSKLGELLKSGELTDIVGVPTSKRTEDQARSLGIPLSILDDHPRIDLAIDGADEVDPNLDLVKGRGGALLREKMVEAASEKFVVVADETKLVTGLGGSGLAMPVEVVQFCWKYNLIRLQELFKEEGVEAKLRMEGDTPYVTDNYNYIVDLYFKTPIKDGPAAGKEISVLEGVVEHGLFLNMATAVIIAGKEGVEVMNK	46|35	5.2|5.2	-|-	2|1	2|1	1|1	1|1	---	---	-	-	-	-	---	---	-	-	-	-	---	---	-	-	-	-	---	---	-	-	-	-	gi|470132333|ref|XP_004302038.1|	100	2e-154	gi|470132333|ref|XP_004302038.1|	PREDICTED: probable ribose-5-phosphate isomerase-like [Fragaria vesca subsp. vesca]	61.11	2e-75	sp|Q9ZU38|RPIA_ARATH	Probable ribose-5-phosphate isomerase OS=Arabidopsis thaliana GN=At2g01290 PE=2 SV=1	83.33	8e-117	G7L1U4	G7L1U4_MEDTR Chloroplast ribose-5-phosphate isomerase OS=Medicago truncatula GN=MTR_7g114900 PE=3 SV=1	DR0845
288	gi|297828556|ref|XP_002882160.1|	nodulin family protein [Arabidopsis lyrata subsp. lyrata] >gi|297328000|gb|EFH58419.1| nodulin family protein [Arabidopsis lyrata subsp. lyrata]	69335	MARTTRERVKSFINNRWLVFVAAMWIQSCAGIGYLFGSISPVIKSSLNYNQKQLSRLGVAKDLGDSVGFLAGTLSEILPLWAALLVGSVQNLVGYGWVWLIVTGRAPILPLWAMCILIFVGNNGETYFNTATLVSGVQNFPKSRGPVVGILKGFAGLGGAILSQVYTMIHSSDRASLIFMVAVAPSVVVVPLMFFIRPVGGHRQIRSSDATSFTIIYAVCILLAAYLMAVMLVEDFIDLSHLIITAFTIVLFAILLVPIFIPIATSCFASTNPCDTLEEPLVGNQQSQDPGQSTTPDHGPELILSEVEDEKPKEVDLLPALERHKRIAQLQAKLMQAAAKGAVRVKRRRGPHRGEDFTLTQALVKADFWLIFFSLLLGSGSGLTVIDNLGQMSQSLGYD…	35|-	1.7|-	1|-	1|-	1|-	1|-	1|-	---	-	-	-	-	-	---	-	-	-	-	-	---	-	-	-	-	-	---	-	-	-	-	-	gi|297828556|ref|XP_002882160.1|	100	0	gi|297828556|ref|XP_002882160.1|	nodulin family protein [Arabidopsis lyrata subsp. lyrata] >gi|297328000|gb|EFH58419.1| nodulin family protein [Arabidopsis lyrata subsp. lyrata]	-	-	-	-	100	0	D7L9J9	D7L9J9_ARALL Nodulin family protein OS=Arabidopsis lyrata subsp. lyrata GN=ARALYDRAFT_896049 PE=4 SV=1	-
289	gi|255575381|ref|XP_002528593.1|	fructose-bisphosphate aldolase, putative [Ricinus communis] >gi|223531989|gb|EEF33801.1| fructose-bisphosphate aldolase, putative [Ricinus communis]	48024	MTAYKGKYADELIANAAYIGTPGKGILAADESTGTIGKRLSSINVENVEENRRALRELLFTAPGALQYLSGVILFEETLYQKTKSGKPFAELLKENGVLPGIKVDKGTVEIAGTDGETTTQGHDGLAQRCQKYYEAGARFAKWRAVLKIGPNEPSQLSINLNAEGLARYAIICQENGLVPIVEPEILVDGPHDINKCAEVTERVLAACYKALNDHHVLLEGTLLKPNMVTPGSDSPKVAPEVVAEYTVRALQRTMPAAVPAVVFLSGGQSEEEATLNLNAMNKLKTKKPWTLSFSFGRALQASTLKAWAGKEENVKKAQEALLVRCKANSEATLGTYKGDATLGEGAAESLHVKDYKY	710|629	20.4|20.4	-|-	27|23	13|7	4|4	2|2	1.156	1.169	10	4	-	-	1.026	1.288	7	4	-	-	0.843	0.607	10	4	-	-	0.885	0.865	7	4	-	-	gi|255575381|ref|XP_002528593.1|	100	0	gi|255575381|ref|XP_002528593.1|	fructose-bisphosphate aldolase, putative [Ricinus communis] >gi|223531989|gb|EEF33801.1| fructose-bisphosphate aldolase, putative [Ricinus communis]	85.75	0	sp|P08440|ALF_MAIZE	Fructose-bisphosphate aldolase, cytoplasmic isozyme OS=Zea mays PE=2 SV=1	100	0	B9SRH4	B9SRH4_RICCO Fructose-bisphosphate aldolase OS=Ricinus communis GN=RCOM_0383870 PE=3 SV=1	XF0826
290	gi|11465963|ref|NP_054505.1|	ATP synthase CF1 epsilon subunit [Nicotiana tabacum] >gi|78102541|ref|YP_358682.1| ATP synthase CF1 epsilon subunit [Nicotiana sylvestris] >gi|351653885|ref|YP_004891610.1| atpE gene product (chloroplast) [Nicotiana undulata] >gi|114610|sp|P00834.1|	16119	MTLNLSVLTPNRIVWDSEVEEIVLSTNSGQIGILPNHAPIATAVDIGILRIRLNDQWLTMALMGGFARIGNNEITVLVNDAEKGSDIDPQEAQQTLELAEANVKKAEGRRQKIEANLALRRARTRVEAINPIS	19|-	15.8|-	1|-	1|-	1|-	1|-	1|-	---	-	-	-	-	-	---	-	-	-	-	-	---	-	-	-	-	-	---	-	-	-	-	-	gi|11465963|ref|NP_054505.1|	100	3e-70	gi|11465963|ref|NP_054505.1|	ATP synthase CF1 epsilon subunit [Nicotiana tabacum] >gi|78102541|ref|YP_358682.1| ATP synthase CF1 epsilon subunit [Nicotiana sylvestris] >gi|351653885|ref|YP_004891610.1| atpE gene product (chloroplast) [Nicotiana undulata] >gi|114610|sp|P00834.1|ATPE_TOBAC RecName: Full=ATP synthase epsilon chain, chloroplastic; AltName: Full=ATP synthase F1 sector epsilon subunit; AltName: Full=F-ATPase epsil…	100	1e-70	sp|Q3C1J6|ATPE_NICSY	ATP synthase epsilon chain, chloroplastic OS=Nicotiana sylvestris GN=atpE PE=3 SV=1	100	4e-69	G3LV06	G3LV06_9SOLA ATP synthase epsilon chain, chloroplastic OS=Nicotiana undulata GN=atpE PE=3 SV=1	slr1330
291	gi|356557028|ref|XP_003546820.1|	PREDICTED: phosphoglycerate kinase, chloroplastic-like [Glycine max]	61596	MASAAAPTTFSLLHSTTPASSSSATSASPSRVQLSSSLRSRPLARRLGFAAADPLLAANVAARVAAVRGGKGARGVVSMAKKSVGELSAADLKGKKVFVRADLNVPLDDNQNITDDTRIRAAIPTIKHLIQNGAKVILSSHLGRPKGVTPKYSLAPLVPRLSELIGIQVVKAEDSIGPEVEKLVASLPDGGVLLLENVRFYKEEEKNDPEHAKKLASLADLFVNDAFGTAHRAHASTEGVTKYLKPSVAGFLLQKELDYLVGAVSSPKRPFAAIVGGSKVSSKIGVIESLLEKVDILLLGGGMIFTFYKAQGLSVGSSLVEEDKLDLATSLLAKAKEKGVSLLLPSDVVIADKFAPDANSKVVPASAIPDGWMGLDIGPDSVKSFSEALDTTQTIIWNG…	2210|2452	26.1|23.8	-|-	73|76	4|3	9|8	2|1	1.404	1.884	3	2	-	-	0.649	1.647	3	2	*	-	0.85	0.625	3	2	-	-	0.708	1.842	3	2	-	-	gi|356557028|ref|XP_003546820.1|	100	0	gi|356557028|ref|XP_003546820.1|	PREDICTED: phosphoglycerate kinase, chloroplastic-like [Glycine max]	92.87	0	sp|Q42961|PGKH_TOBAC	Phosphoglycerate kinase, chloroplastic OS=Nicotiana tabacum PE=2 SV=1	99.01	0	I1KTX8	I1KTX8_SOYBN Uncharacterized protein OS=Glycine max GN=Gma.34980 PE=4 SV=1	all4131
292	gi|158427474|gb|ABW38332.1|	cytosolic fructose-1,6-bisphosphatase [Fragaria x ananassa]	46836	MDHEADAYRTDLMTMTRFVLNEQSKHPESLGDFTILLSHIVLGCKFVCSAVNKAGLAKLIGLAGETNVQGEEQKKLDVLSNEVFVKALVSSGRTCILVSEEDEDAIFVEPSKRGKYCVVFDPLDGSSNIDCGVSIGTIFGIYALYDGGEPKLDDVLQPGKNMVAAGYCMYGSSCTFVLTTGSGVHGFTLDPSLGEFILTHPNIKIPKKGKSYSVNEGNAKNWDGPTAKYVEKCKFPTDGSPPKSLRYIGSMVADVYRTLLYGGIFLYPGDKKSPNGKLRVLYEVFPMSFLLEQAGGQAFTGKERALDLVPKKIHERSPIFLGSYDDVEEIKALYAAEEKKE	99|-	9.1|-	11|-	4|-	4|-	2|-	2|-	1.204	-	3	-	-	-	0.819	-	2	-	-	-	0.927	-	3	-	-	-	0.722	-	2	-	-	-	gi|158427474|gb|ABW38332.1|	100	0	gi|158427474|gb|ABW38332.1|	cytosolic fructose-1,6-bisphosphatase [Fragaria x ananassa]	88.5	1e-178	sp|P14766|F16P2_SPIOL	Fructose-1,6-bisphosphatase, cytosolic OS=Spinacia oleracea PE=1 SV=2	100	0	A8VYM8	A8VYM8_FRAAN Cytosolic fructose-1,6-bisphosphatase OS=Fragaria ananassa PE=2 SV=1	YLR377c
293	gi|222051768|dbj|BAH15357.1|	germin like protein [Nicotiana tabacum]	25173	MFKLLFLLAIFILGSNAAVQDFCVADLKGPESPAGYSCKSVANVTVDDFVFSGLSAAGNTASIIKAAVTPAFAAQFPGLNGLGLSAARLDLAPGGVIPFHTHPGASEVLLVVQGSITAGFVSSANAVYLKTLKKGDLMIFPQGLLHFQVSDAGYTSVGFVFSSSSSPGLQITDFALFANDLPTKLVEATTFLDEATIKKLKGVLGGTN	98|233	6.7|17.8	-|-	4|12	4|12	1|2	1|2	2.461	1.861	2	7	*	*	---	3.396	1	6	-	*	0.338	0.549	2	7	-	*	4.034	3.248	3	6	*	*	gi|222051768|dbj|BAH15357.1|	100	1e-99	gi|222051768|dbj|BAH15357.1|	germin like protein [Nicotiana tabacum]	75.26	1e-76	sp|Q9ZRA4|AB19A_PRUPE	Auxin-binding protein ABP19a OS=Prunus persica GN=ABP19A PE=3 SV=1	100	1e-98	B9A6I8	B9A6I8_TOBAC Germin like protein OS=Nicotiana tabacum GN=glp PE=2 SV=1	-
294	gi|242041317|ref|XP_002468053.1|	hypothetical protein SORBIDRAFT_01g038760 [Sorghum bicolor] >gi|241921907|gb|EER95051.1| hypothetical protein SORBIDRAFT_01g038760 [Sorghum bicolor]	32790	MAKSYPTVSAEYSEAVEKARQKLRALIAEKSCAPLMLRLAWHSAGTFDVSSRTGGPFGTMKNPAELAHGANAGLDIAVRLLEPIKEEFPILSYADFYQLAGVVAVEVTGGPQIPFHPGREDKPQPPPEGRLPDATKGSDHLRQVFGKQMGLSDQDIVALSGGHTLGRCHKERSGFEGAWTSNPLVFDNSYFKELLSGDKEGLLQLPSDKALLSDPAFRPLVDKYAADEKAFFEDYKEAHLKLSELGFADA	159|-	17.6|-	-|-	11|-	1|-	3|-	1|-	---	-	-	-	-	-	---	-	-	-	-	-	---	-	-	-	-	-	---	-	-	-	-	-	gi|242041317|ref|XP_002468053.1|	100	7e-144	gi|242041317|ref|XP_002468053.1|	hypothetical protein SORBIDRAFT_01g038760 [Sorghum bicolor] >gi|241921907|gb|EER95051.1| hypothetical protein SORBIDRAFT_01g038760 [Sorghum bicolor]	91.6	1e-133	sp|Q10N21|APX1_ORYSJ	L-ascorbate peroxidase 1, cytosolic OS=Oryza sativa subsp. japonica GN=APX1 PE=1 SV=1	100	7e-143	C5WNL8	C5WNL8_SORBI Putative uncharacterized protein Sb01g038760 OS=Sorghum bicolor GN=Sb01g038760 PE=3 SV=1	YKR066c
295	gi|15231702|ref|NP_190856.1|	monodehydroascorbate reductase (NADH) [Arabidopsis thaliana] >gi|50401173|sp|Q9LFA3.1|MDAR3_ARATH RecName: Full=Probable monodehydroascorbate reductase, cytoplasmic isoform 3; Short=MDAR 3 >gi|7529712|emb|CAB86892.1| monodehydroascorbate reductase (	58797	MAEKSFKYIILGGGVSAGYAAKEFANQGVQPGELAVISKEAVAPYERPALSKGYLFPEGAARLPGFHCCVGSGGEKLLPESYKQKGIELILSTEIVKADLSAKSLVSATGDVFKYQTLIIATGSTVLRLTDFGVKGADSKNILYLREIDDADKLVEAIKAKKGGKAVVVGGGYIGLELSAVLRINNLDVTMVFPEPWCMPRLFTADIAAFYETYYTNKGVKIIKGTVASGFTAQPNGEVKEVQLKDGRTLEADIVIVGVGAKPLTSLFKGQVEEDKGGIKTDAFFKTSVPDVYAVGDVATFPLKMYGDVRRVEHVDHSRKSAEQAVKAIKAAEGGAAVEEYDYLPFFYSRSFDLSWQFYGDNVGDSVLFGDSNPSNPKPRFGAYWVQGGKVVGAFMEGG…	17|-	3.2|-	3|-	1|-	1|-	1|-	1|-	---	-	-	-	-	-	---	-	-	-	-	-	---	-	-	-	-	-	---	-	-	-	-	-	gi|15231702|ref|NP_190856.1|	100	0	gi|15231702|ref|NP_190856.1|	monodehydroascorbate reductase (NADH) [Arabidopsis thaliana] >gi|50401173|sp|Q9LFA3.1|MDAR3_ARATH RecName: Full=Probable monodehydroascorbate reductase, cytoplasmic isoform 3; Short=MDAR 3 >gi|7529712|emb|CAB86892.1| monodehydroascorbate reductase (NADH)-like protein [Arabidopsis thaliana] >gi|15010730|gb|AAK74024.1| AT3g52880/F8J2_50 [Arabidopsis thaliana] >gi|16974425|gb|AAL31138.1| AT3g52880/F…	100	0	sp|Q9LFA3|MDAR3_ARATH	Probable monodehydroascorbate reductase, cytoplasmic isoform 3 OS=Arabidopsis thaliana GN=At3g52880 PE=1 SV=1	100	0	Q0WUV6	Q0WUV6_ARATH AT3G52880 protein OS=Arabidopsis thaliana GN=At3g52880 PE=2 SV=1	SMc00914
296	gi|317373793|gb|ADV16379.1|	long-chain acyl-CoA synthetase 2 [Helianthus annuus]	96402	MDVGGSLSTFMKDKSYGAAIAVLFAVAVPLVLSSMFVGKKKVKQRGVPVEVGGEPGFGMRNVRSKKLVDVPWEGATTMAALFEQSCKKHSQHRFLGTRKLIERSFIDGSGGRKFEKLHLGEYEWETFGQVFERVCNFASGLIQLGHDPDTRIAIFSDTRAEWLIAFEGCFRQNITVVTIYASLGDDALIHSLNETKVSTLICDSKLLKKVASVSSSLETVTNVIYFESDNTEALSKIGDWQISSFSEVEKMGRNSPVKARLPIKKDIAVIMYTSGSTGLPKGVMMTHGNVVATAAAVMTVIPGIGTSDVYMAYLPLAHIFELAAETVMITAGSSIGYGSALTLTDTSNKIKKGTMGDATALKPTLMASVPAILDRVRDGVVKKVEEKGGLTTKLFNIAY…	-|24	-|2.1	-|-	-|1	-|1	-|1	-|1	-	---	-	-	-	-	-	---	-	-	-	-	-	---	-	-	-	-	-	---	-	-	-	-	gi|317373793|gb|ADV16379.1|	100	0	gi|317373793|gb|ADV16379.1|	long-chain acyl-CoA synthetase 2 [Helianthus annuus]	71.49	0	sp|Q9SJD4|LACS8_ARATH	Long chain acyl-CoA synthetase 8 OS=Arabidopsis thaliana GN=LACS8 PE=2 SV=1	76.18	0	D7TD95	D7TD95_VITVI Putative uncharacterized protein OS=Vitis vinifera GN=VIT_12s0057g01270 PE=4 SV=1	SPBC18H10.02
297	gi|359487428|ref|XP_002263448.2|	PREDICTED: chaperone protein dnaJ 1, mitochondrial-like [Vitis vinifera] >gi|297736212|emb|CBI24850.3| unnamed protein product [Vitis vinifera]	59812	MVRTNGAKLFRCLARKSLQSSLLEASPTSINESLLRGHYRCFGSGICNNSSRVIGIPNSTSVNHRNRLLFGVLNANWGAARWIHGTAYMAANDYYDTLGVSKNASASEIKKAYYGLAKKFHPDTNKEDPDAEKKFQEVQKAYEVLKDEEKRSLYDQVGHDAFEQANTEGGAGNPFHGGGFGNPFEDIFQNDFFKTIFKQNIGGQDVKVSIELSFMEAVQGCTKTVTFQTALPCEACGGSGVPPGTKPETCKRCRGSGMMFMQNGPFRLQSTCTHCGGTGKTVSTFCKSCKGDRVVRGSKSVKLDIMPGVDDNETLKVYRSGGADPEGNQPGDLYVTIRVRQDPVFRREGPDIHVDAVLSITQAILGGTIQVPTLTGDVVLKVRPGTQPGQKVVLKRKGV…	-|16	-|1.8	-|-	-|1	-|1	-|1	-|1	-	---	-	-	-	-	-	---	-	-	-	-	-	---	-	-	-	-	-	---	-	-	-	-	gi|359487428|ref|XP_002263448.2|	100	0	gi|359487428|ref|XP_002263448.2|	PREDICTED: chaperone protein dnaJ 1, mitochondrial-like [Vitis vinifera] >gi|297736212|emb|CBI24850.3| unnamed protein product [Vitis vinifera]	44.23	1e-63	sp|Q74H58|DNAJ_GEOSL	Chaperone protein DnaJ OS=Geobacter sulfurreducens (strain ATCC 51573 / DSM 12127 / PCA) GN=dnaJ PE=3 SV=1	100	0	D7T2W9	D7T2W9_VITVI Putative uncharacterized protein OS=Vitis vinifera GN=VIT_13s0064g01360 PE=3 SV=1	NMB0059
298	gi|348665613|gb|EGZ05442.1|	hypothetical protein PHYSODRAFT_373022 [Phytophthora sojae]	21451	PSDSVLSVADDPLALLFYFLPPKLWDQIAVESNTYHRQSIPQRARMLRTQQRRNGGDVEELGEIRRRLAAVDDIETWEVLRVMALLIARMLALIRKGNAAHWSLKKIGALPANRFGNFMPKNRFFHIMGYLHFSNNKSPQARLDRAWKIRPVVDVMQRTFARGY	33|-	4.9|-	-|-	1|-	1|-	1|-	1|-	---	-	-	-	-	-	---	-	-	-	-	-	---	-	-	-	-	-	---	-	-	-	-	-	gi|348665613|gb|EGZ05442.1|	100	5e-82	gi|348665613|gb|EGZ05442.1|	hypothetical protein PHYSODRAFT_373022 [Phytophthora sojae]	-	-	-	-	100	5e-81	G5AFS6	G5AFS6_PHYSP Putative uncharacterized protein (Fragment) OS=Phytophthora sojae (strain P6497) GN=PHYSODRAFT_373022 PE=4 SV=1	-
299	gi|270269274|gb|ACZ66261.1|	progesterone 5beta-reductase 2 [Digitalis purpurea]	52962	MYTDTTTWWYKRSIGDIEQKNVETNGVALNYKSVALIVGVTGIAGSGLAETLSKSDTPGGPWKVYGVARRPCPEWLAKLHVSYIQCDIGSTDDTSAKLSPLSDITHIFYVSWTGSEDCDKNAIMFKNILDSVIPNAPNLKHISLQTGIKHYWGNMVDEMDTTNVSHDCPFYENMPRLRQPNFYYNLEDLLYEACGTQNGALTWTVHRPALIFGFSPCSLMNIVATLSVYAAICKYENKPLVYTGTETSWNCLVDAVDSDLLADHLVWGAISPNAKNQAFNINNGDVFKWKHIWKVLADQFEIEFVGYEGKEPVSLEGLMKDKDSVWDEIVERYDLVPTKLKDIAAFWFADVAFSIEGAVSSMNKNKEFGFMGFRDSTKSFISSVNKVRTYRFVP	64|41	3.6|3.6	1|1	2|1	2|1	1|1	1|1	---	---	1	-	-	-	---	---	1	-	-	-	---	---	1	-	-	-	---	---	1	-	-	-	gi|270269274|gb|ACZ66261.1|	100	0	gi|270269274|gb|ACZ66261.1|	progesterone 5beta-reductase 2 [Digitalis purpurea]	53.83	1e-113	sp|Q6PQJ9|5BPOR_DIGLA	3-oxo-Delta(4,5)-steroid 5-beta-reductase OS=Digitalis lanata PE=1 SV=1	100	0	D2JSQ9	D2JSQ9_DIGPU Progesterone 5beta-reductase 2 OS=Digitalis purpurea GN=P5BR2 PE=2 SV=1	-
300	gi|403329380|gb|AFR42000.1|	alpha-tubulin, partial [Populus fremontii]	18821	TGAGKHVPRAXFVDLEPTVIDEVRTGAYRQLFHPEQLISGKEDAANNFARGHYTIGKEIVDLCLDRIRKLADNCTGLQGFLVFNAVGGGTGSGLGSLLLERLSVDYGKKSKLGFTVYPSPQVSTSVVEPYNSVLSTHSLLEHTDVAVLLDN	569|709	17.9|17.9	-|-	22|20	14|15	3|4	2|3	0.617	0.761	11	7	*	*	1.431	0.983	5	8	-	-	0.785	0.62	11	9	-	-	0.692	0.486	5	8	*	*	gi|403329380|gb|AFR42000.1|	100	2e-71	gi|403329380|gb|AFR42000.1|	alpha-tubulin, partial [Populus fremontii]	99.34	4e-72	sp|P46259|TBA1_PEA	Tubulin alpha-1 chain OS=Pisum sativum GN=TUBA1 PE=3 SV=1	99.34	7e-71	Q84XV0	Q84XV0_POPTM Alpha tubulin OS=Populus tremuloides PE=2 SV=1	SPBC800.05c
301	gi|434310|emb|CAA53993.1|	glutathione reductase [Nicotiana tabacum]	45756	DPHTVDVDGKLYSAKNILISVGGRPFIPDIPGSEYAIDSDAALDLPTKPNKIAIVGGGYIALEFAGIFNGLKSEVHVFIRQKKVLRGFDEEIRDFVGEQMSLRGIEFHTEESPQAIIKSADGSLSLKTSRGTVEGFSHIMFATGRRPNTKNLGLETVGVKMTKNGAIEVDEYSRTSVPSIWAVGDVTDRINLTPVALMEGGALAKTIFADEPTKPDYRNVPAAVFSQPPIGQVGLMEEQAIKEFGDVDVYTANFRPLKATISGLPDRVFMKLIVCAKTSKVLGLHMCGDDAPEIVQGFAIAVKAGLTKADFDSTVGIHPTSAEEFVTMRTPTRKVRSSPSEGKAEHDIKAAAGV	133|218	8.8|13.0	10|6	7|9	6|8	2|3	1|2	0.925	1.345	2	5	-	-	0.847	1.075	2	4	-	-	1.395	1.316	2	5	-	-	0.982	1.272	2	4	-	-	gi|434310|emb|CAA53993.1|	100	0	gi|434310|emb|CAA53993.1|	glutathione reductase [Nicotiana tabacum]	99.15	0	sp|P80461|GSHRP_TOBAC	Glutathione reductase, chloroplastic (Fragment) OS=Nicotiana tabacum GN=GOR PE=1 SV=1	100	0	Q40506	Q40506_TOBAC Glutathione reductase (Fragment) OS=Nicotiana tabacum GN=gor PE=2 SV=1	PA2025
302	gi|224139104|ref|XP_002322981.1|	predicted protein [Populus trichocarpa] >gi|222867611|gb|EEF04742.1| predicted protein [Populus trichocarpa]	38175	MAGTGVVAVYGNGAITETKKSPFSVKVGLAQMLRGGVIMDVVTPEQARIAEEAGACAVMALERVPADIRAQGGVARMSDPQLIKEIKQAVTIPVMAKARIGHFVEAQILEAIGIDYIDESEVLTPADEENHINKHNFRIPFVCGCRNLGEALRRIREGAAMIRTKGEAGTGNVIEAVRHVRSVMGDIRVLRNMDDDEVFTFAKKIAAPYDLVMQTKQLGRLPVVQFAAGGVATPADAALMMQLGCDGVFVGSGVFKSGDPVKRGRAIVQAVTHYSDPQVLAEVSCGLGEAMVGLNLNDKKIERFASRSD	201|148	7.8|8.4	-|-	8|7	7|5	2|2	1|1	1.103	0.386	5	3	-	-	1.171	0.817	3	2	-	-	0.68	1.615	5	3	-	-	1.016	0.664	3	2	-	-	gi|224139104|ref|XP_002322981.1|	100	7e-162	gi|224139104|ref|XP_002322981.1|	predicted protein [Populus trichocarpa] >gi|222867611|gb|EEF04742.1| predicted protein [Populus trichocarpa]	95.79	9e-157	sp|Q39963|PDX1_HEVBR	Probable pyridoxal biosynthesis protein PDX1 OS=Hevea brasiliensis GN=PDX1 PE=2 SV=1	100	7e-161	B9IG96	B9IG96_POPTR Predicted protein OS=Populus trichocarpa GN=POPTRDRAFT_576973 PE=3 SV=1	SPAC29B12.04
303	gi|307136489|gb|ADN34289.1|	ted2 [Cucumis melo subsp. melo]	27981	MCLLRTTLQFHCNPIVFKQFFYRIPSSPVCSFATHRYHLKLKTDNSITRAISSRAESSALEMVKAIRVHELGGPEVLKWEDVEIGEPKEGEVRVRNKAIGLNFIDVYFRKGVYKAATMPFTPGMEAAGVVIAVGPGVNDRKVGDLVAYAGNPMGSYTEEQILPADKVVPVPPSVDPTIAASVILKGMTAQFLVRRCYKVEPGHIVLVHAAAGGVGS	-|64	-|10.2	-|1	-|2	-|1	-|2	-|1	-	---	-	1	-	-	-	---	-	-	-	-	-	---	-	1	-	-	-	---	-	-	-	-	gi|307136489|gb|ADN34289.1|	100	1e-109	gi|307136489|gb|ADN34289.1|	ted2 [Cucumis melo subsp. melo]	51.3	5e-30	sp|P43903|QOR_PSEAE	Quinone oxidoreductase OS=Pseudomonas aeruginosa (strain ATCC 15692 / PAO1 / 1C / PRS 101 / LMG 12228) GN=qor PE=3 SV=2	100	1e-108	E5GCU0	E5GCU0_CUCME Ted2 (Fragment) OS=Cucumis melo subsp. melo PE=4 SV=1	BMEII0696
304	gi|410109953|gb|AFV61056.1|	pentatricopeptide repeat-containing protein 11, partial [Nashia inaguensis]	59705	FSFFTWLSSPANSTFRHTLHSYCTMIHFLCTHQMLSEAKSLIQVVVSRKGKGSASAVFATILETKGTQRSDIYVFSGLITAYLESGFLRDAIECYRLTREHKLWVPFDTCRKVLEHLMKLRYFKLVWGFYEEILECGYPASLYFFNILMHRFCKDGDIRVAQSVFDAITKWGLRPSVVSYNTLMNGYIRLGDLDEGFRLKSAMLASGVQPDVYTYSVLINGLCKESKMDDANELFDEMLVKGLIPNGVTFTTLIXGHCKNGRVDLAMEIYKXMLSQSLLPDLITYNTLIYGLCKKGDLKQAHXLIDEMSMKGLKPDKFTYTTLIDGCCKEGDLDTAFKHRKRMIQGNIRLDDVAYTALISGLCQEGRSVDAEKMLREMLSVGLKPDIGTYTMIINEFCK…	-|17	-|2.8	-|-	-|1	-|1	-|1	-|1	-	---	-	-	-	-	-	---	-	-	-	-	-	---	-	-	-	-	-	---	-	-	-	-	gi|410109953|gb|AFV61056.1|	100	0	gi|410109953|gb|AFV61056.1|	pentatricopeptide repeat-containing protein 11, partial [Nashia inaguensis]	55.68	9e-141	sp|O04491|PPR26_ARATH	Putative pentatricopeptide repeat-containing protein At1g09680 OS=Arabidopsis thaliana GN=At1g09680 PE=3 SV=1	94.74	0	D2DHS3	D2DHS3_9LAMI Pentatricopeptide repeat-containing protein (Fragment) OS=Lantana canescens PE=4 SV=1	-
305	gi|2606077|gb|AAB84222.1|	auxin-induced protein [Helianthus annuus]	44671	MARVPRVKLGSQGLEVSAQGLGCMSMSAFYGPPKPEPDMINLIHHAVNSGVTFVDTSDYYGPKTNEILLGKALKGGMRDKVELATKYGIKLSGSWEVKGDPAYVRAACEASLKRLYVDCIDLYYQHRIDTRVPIEITMGELKELVEEGKIKYVGLSEASASTIRRAHSVHPITAIQLEWSLWSRDVEEDIIPTCRELGIGIVAYSPLGRGFFASGSKMMEKLEDGDYRPNFPRFQPENLEHNKILYERVSEIASKKGCTTSQLALAWVHHQGNDVVPIPGTTKIENLEQNIGALSVKITPEEMAELESTTHLVKGARCNAGTPTYLDSETLPLSSWKS	82|138	8.0|8.0	2|2	3|6	1|2	2|2	1|1	---	---	-	-	-	-	---	---	-	-	-	-	---	---	-	-	-	-	---	---	-	-	-	-	gi|2606077|gb|AAB84222.1|	100	0	gi|2606077|gb|AAB84222.1|	auxin-induced protein [Helianthus annuus]	78.98	7e-139	sp|P40691|A115_TOBAC	Auxin-induced protein PCNT115 OS=Nicotiana tabacum PE=2 SV=1	100	0	O22627	O22627_HELAN Auxin-induced protein OS=Helianthus annuus GN=HaAC1 PE=2 SV=1	AGc447
306	gi|147866537|emb|CAN81585.1|	hypothetical protein VITISV_023191 [Vitis vinifera]	57677	MEKAINRQRVLLQHLSPSSSAAEDESSLSASVCVAGDSAAYQRTSVFGDDVVIVAAYRTALCKSKRGGFKDTYPDDLLAPVLRALIEKTNLNPNEVGDIVVGTVLAPGSQRASECRMAAFYAGFPETVPVRTVNRQCSSGLQAVADVAAAIKAGFYDIGIGAGLESMTANPMAWEGSINPKVKEFVQAQDCLLPMGITSENVAHRFGVTRQEQDQAAVESHKRAAAATATGKFKDEIIPVSTKIVDPKTGDEKPVTISVDDGIRPNAIMSDLAKLKPVFKKNGTTTAGNSSQVSDGAGAVLLMKRSVAMRKGLPILGVFRTFAAVGVDPAVMGIGPAVAIPAAVKSAGLELDDIDLFEINEAFASQFVYCRKKLDLDPEKINVNGGAMAIGHPLGATGA…	72|84	8.0|8.9	5|5	5|6	4|1	3|3	2|1	---	---	1	-	-	-	---	---	-	-	-	-	---	---	1	-	-	-	---	---	-	-	-	-	gi|147866537|emb|CAN81585.1|	100	0	gi|147866537|emb|CAN81585.1|	hypothetical protein VITISV_023191 [Vitis vinifera]	87.45	0	sp|Q56WD9|THIK2_ARATH	3-ketoacyl-CoA thiolase 2, peroxisomal OS=Arabidopsis thaliana GN=PED1 PE=1 SV=2	100	0	A5BXL8	A5BXL8_VITVI Putative uncharacterized protein OS=Vitis vinifera GN=VITISV_023191 PE=3 SV=1	BH3487
307	gi|4336887|gb|AAD17997.1|	sophorol reductase [Pisum sativum]	45199	MAEGKGRVCVTGGTGFLGSWIIKSLLENGYSVNTTVRPDPKRKRDLSFLTNLPGASERLHFFNADLSDPKSFSAAVKGCVGVFHTATPVNFAVSEPEKIVTKRTVDGALGILKACVNSKTLKRFIYTSSGSAVSFNGKNKEVLDETDWSDVGLLKSVKPFGWSYSVSKTLAEKAVLDFGQQNGIDVATLILPFIVGSFICPKLPDSVDKALVLVLGKKEQIGVTRFHMVHVDDVARAHIYLLENSVPGGRYNCAPFIVTIEEMSQLFSAKYPEFQILSVDELKEIKGARLAELNSKKLVAAGFEFKYSVDDMFEDAIQCCKEKGYL	84|47	4.3|4.3	-|-	5|2	5|2	1|1	1|1	---	---	-	1	-	-	---	---	-	1	-	-	---	---	-	1	-	-	---	---	-	1	-	-	gi|4336887|gb|AAD17997.1|	100	0	gi|4336887|gb|AAD17997.1|	sophorol reductase [Pisum sativum]	44.28	6e-74	sp|P51102|DFRA_ARATH	Dihydroflavonol-4-reductase OS=Arabidopsis thaliana GN=DFRA PE=3 SV=2	100	0	Q9ZPK2	Q9ZPK2_PEA Sophorol reductase OS=Pisum sativum PE=2 SV=1	SA0317
308	gi|15226167|ref|NP_180936.1|	30S ribosomal protein S5 [Arabidopsis thaliana] >gi|75101015|sp|P93014.1|RR5_ARATH RecName: Full=30S ribosomal protein S5, chloroplastic; Flags: Precursor >gi|1707008|gb|AAC69132.1| 30S ribosomal protein S5 [Arabidopsis thaliana] >gi|15450886|gb|AAK	39679	MATASALSSLSSLSLHTRTSSLISSSSTKSIVSFSSFLNRRFSSLTLVKASSTDTETIFFEDETPEITANVVFDPPIAPEGFVSPPYFDEGSDETEEEIATAFEELYGPAYSGESMLGKDIYVMDSKHKKSSGIGGKPKKDKIRDGFEERVVQVRRVTKVVKGGKQLKFRAIVVVGDKQGNVGVGCAKAKEVVAAVQKSAIDARRNIVQVPMTKYSTFPHRSEGDYGAAKVMLRPASPGTGVIAGGAVRIVLEMAGVENALGKQLGSNNALNNARATLAAVQQMRQFRDVAQERGIPMEELWK	154|174	9.2|13.9	4|4	8|9	8|8	2|3	2|2	0.286	0.677	3	3	-	-	0.965	0.917	3	3	-	-	1.575	1.039	3	3	-	-	0.317	0.503	3	3	*	-	gi|15226167|ref|NP_180936.1|	100	2e-82	gi|15226167|ref|NP_180936.1|	30S ribosomal protein S5 [Arabidopsis thaliana] >gi|75101015|sp|P93014.1|RR5_ARATH RecName: Full=30S ribosomal protein S5, chloroplastic; Flags: Precursor >gi|1707008|gb|AAC69132.1| 30S ribosomal protein S5 [Arabidopsis thaliana] >gi|15450886|gb|AAK96714.1| 30S ribosomal protein S5 [Arabidopsis thaliana] >gi|20259882|gb|AAM13288.1| 30S ribosomal protein S5 [Arabidopsis thaliana] >gi|21593322|gb|A…	100	6e-83	sp|P93014|RR5_ARATH	30S ribosomal protein S5, chloroplastic OS=Arabidopsis thaliana GN=rps5 PE=1 SV=1	98.33	1e-40	C0Z229	C0Z229_ARATH AT2G33800 protein OS=Arabidopsis thaliana GN=AT2G33800 PE=2 SV=1	all4199
309	gi|224088300|ref|XP_002308408.1|	predicted protein [Populus trichocarpa] >gi|222854384|gb|EEE91931.1| predicted protein [Populus trichocarpa]	59848	MAVQTKSHLLILSLLLVSSLTTTIVALNRQQELDRISALPGQPAVTFSQFSGYVTVNEKHGRALFYWLTEATAIPDKKPLVLWLNGGPGCSSVAYGASEEIGPFRINRTGLSLYMNKYSWNKEANILFLESPAGVGFSYTNTSSNLKDSGDKRTAQDALVFLTRWMSRFPQYKYREFYIAGESYAGHYVPQLAKKIHDYNKAYPHPIINLKGFIVGNAVTDNYYDSIGTVAFWWTHSMISDRTYRAILDNCNFTEDTASNQCDDAVTYAMNHEFGDIDQYSIYTPSCMQLPNSTVRLKNTLLRRRVSGYDPCTEKYAEKYYNRPEVQKAMHANVTGIPYKWTACSDVLIKNWKDSESSMLPVYKDLIAAGLRIWVFSGDTDSVVPVTATRFSLSHLNLT…	60|67	6.3|8.9	-|-	4|4	3|2	2|3	1|2	---	---	-	-	-	-	---	---	-	-	-	-	---	---	-	-	-	-	---	---	-	-	-	-	gi|224088300|ref|XP_002308408.1|	100	0	gi|224088300|ref|XP_002308408.1|	predicted protein [Populus trichocarpa] >gi|222854384|gb|EEE91931.1| predicted protein [Populus trichocarpa]	78.36	0	sp|Q9M099|SCP24_ARATH	Serine carboxypeptidase 24 OS=Arabidopsis thaliana GN=SCPL24 PE=1 SV=1	100	0	B9HB33	B9HB33_POPTR Predicted protein OS=Populus trichocarpa GN=POPTRDRAFT_762932 PE=4 SV=1	SPAC19G12.10c_2
310	gi|194396261|gb|ACF60500.1|	plastid transketolase [Nicotiana tabacum]	93531	MASSSSLTLSQAILSRSVPRHGSASSSQLSPSSLTFSGLKSNPNITTSRRRTPSSAAAAAVVRSPAIRASAATETIEKTETALVDKSVNTIRFLAIDAVEKANSGHPGLPMGCAPMGHILYDEVMRYNPKNPYWFNRDRFVLSAGHGCMLQYALLHLAGYDAVREEDLKSFRQWGSKTPGHPENFETPGVEVTTGPLGQGIANAVGLALVEKHLAARFNKPDAEIVDHYTYVILGDGCQMEGISQEACSLAGHWGLGKLIAFYDDNHISIDGDTEIAFTEDVGARFEALGWHVIWVKNGNTGYDEIRAAIKEAKTVTDKPTMIKVTTTIGFGSPNKANSYSVHGSALGAKEVEATRSNLGWPYEPFHVPEDVKSHWSRHVTEGAALEAGWNTKFAEYEK…	644|470	18.1|13.7	-|-	41|28	3|3	11|8	1|1	1.391	1.939	3	2	-	-	3.697	2.786	3	2	*	*	0.644	0.471	3	2	*	-	2.966	2.421	3	2	-	-	gi|194396261|gb|ACF60500.1|	100	0	gi|194396261|gb|ACF60500.1|	plastid transketolase [Nicotiana tabacum]	88.71	0	sp|Q43848|TKTC_SOLTU	Transketolase, chloroplastic OS=Solanum tuberosum PE=2 SV=1	100	0	C3RXI5	C3RXI5_TOBAC Plastid transketolase OS=Nicotiana tabacum PE=2 SV=1	alr3344
311	gi|302766407|ref|XP_002966624.1|	hypothetical protein SELMODRAFT_85621 [Selaginella moellendorffii] >gi|300166044|gb|EFJ32651.1| hypothetical protein SELMODRAFT_85621 [Selaginella moellendorffii]	164377	MADAAGAFVTRAFERLAKESQGKKYTALQNALKEYLGHPTAASSVTSPKRRTSSQVAAATMAEAGGTLEVSEADLILLPLRLAIETKQPKLVETALDCLHKLISFGHLEGEAGAEGGKNGAMLTEVLNKVCSCIDNSATDSTVLQVIKVLLTAVASSKFQVHGECLLSSIRTCYSIVLNRYLMESENGVRVLVYVLDLHTHYKQPAEHVLSQQKNNPDASVSVEELQHLAGDADIKGLEAALDKAILSEGGAVSNEGIDLNSLNVGQREALMVFRTLCKMSMKDGADDMVTRTKILSLELIQQGLLESVSPSFTVNFAFIDSIKAYLSYALLRACVSSNTTIFQNSCGIFMVLLLRFRESLKAEVGVFFSLIVLRPLDSVDTPLQQRLSVLKMLERVCT…	49|-	0.6|-	1|-	2|-	2|-	1|-	1|-	3.115	-	2	-	-	-	0.796	-	2	-	-	-	0.789	-	2	-	*	-	1.759	-	2	-	-	-	gi|302766407|ref|XP_002966624.1|	100	0	gi|302766407|ref|XP_002966624.1|	hypothetical protein SELMODRAFT_85621 [Selaginella moellendorffii] >gi|300166044|gb|EFJ32651.1| hypothetical protein SELMODRAFT_85621 [Selaginella moellendorffii]	60.35	0	sp|F4IXW2|BIG5_ARATH	Brefeldin A-inhibited guanine nucleotide-exchange protein 5 OS=Arabidopsis thaliana GN=BIG5 PE=1 SV=2	100	0	D8R6C8	D8R6C8_SELML Putative uncharacterized protein OS=Selaginella moellendorffii GN=SELMODRAFT_85621 PE=4 SV=1	SPAC30.01c
312	gi|29839377|sp|Q8W013.1|COMT1_CATRO	RecName: Full=Caffeic acid 3-O-methyltransferase; Short=CAOMT; Short=COMT; AltName: Full=S-adenosysl-L-methionine:caffeic acid 3-O-methyltransferase >gi|18025321|gb|AAK20170.1| caffeic acid O-methyltransferase [Catharanthus roseus]	49094	MGSANPDNKNSMTKEEEEACLSAMRLASASVLPMVLKSAIELDLLELIKKSGPGAYVSPSELAAQLPTQNPDAPVMLDRILRLLASYSVLNCTLKDLPDGGIERLYSLAPVCKFLTKNEDGVSMAALLLMNQDKVLMESWYHLKDAVLEGGIPFNKAYGMTAFEYHGKDPRFNKVFNQGMSNHSTIIMKKILEIYQGFQGLKTVVDVGGGTGATLNMIVSKYPSIKGINFDLPHVIEDAPSYPGVDHVGGDMFVSVPKGDAIFMKWICHDWSDAHCLKFLKNCHEALPENGKVILAECLLPEAPDSTLSTQNTVHVDVIMLAHNPGGKERTEKEFEALAKGAGFRGFIKVCCAYNSWIMELLK	54|60	3.3|3.3	2|2	1|1	1|1	1|1	1|1	---	---	1	1	-	-	---	---	1	1	-	-	---	---	1	1	-	-	---	---	1	1	-	-	gi|29839377|sp|Q8W013.1|COMT1_CATRO	100	0	gi|29839377|sp|Q8W013.1|COMT1_CATRO	RecName: Full=Caffeic acid 3-O-methyltransferase; Short=CAOMT; Short=COMT; AltName: Full=S-adenosysl-L-methionine:caffeic acid 3-O-methyltransferase >gi|18025321|gb|AAK20170.1| caffeic acid O-methyltransferase [Catharanthus roseus]	100	0	sp|Q8W013|COMT1_CATRO	Caffeic acid 3-O-methyltransferase OS=Catharanthus roseus GN=COMT1 PE=2 SV=1	85.9	1e-108	Q2YHN1	Q2YHN1_PLAMJ Caffeoyl-CoA O-methyltransferase (Fragment) OS=Plantago major GN=ccoAOMT2 PE=2 SV=1	Rv0567
313	gi|470147835|ref|XP_004309483.1|	PREDICTED: probable cinnamyl alcohol dehydrogenase 1-like [Fragaria vesca subsp. vesca]	47724	MSSESSMANANGNCLGWAARDASGILSPYKFNRRDVQADDVSIKITHCGVCYAEVVWPKNKHGDATYPMVPGHEIVGIVQEVGPNVHRFKVGDHVGVGAYTNSCRDCEYCNDGLEVYCDKGVVLTYNRFDYDGTLTHGGFSTFTVVHERYCFKIPEDYPLASAAPLLCAGITVYSPMMDHKMNKPGKSLGVIGLGGLGHMAVKFGKAFGLKVTVFSTSMSKKDEALTVLGADSFVVSSDQDQMKALAKSLDFIVDTASGHHPFDLYMSVLKTAGVLVLVGAPSEIKLNPMSLLIGKRSITGSASGGTKQIQEMLNFCAAHKIYPNIEVVPIQYVNEAIERLIKKDVKYRFVVDIGNSLK	32|-	2.8|-	1|-	1|-	1|-	1|-	1|-	---	-	-	-	-	-	---	-	-	-	-	-	---	-	-	-	-	-	---	-	-	-	-	-	gi|470147835|ref|XP_004309483.1|	100	0	gi|470147835|ref|XP_004309483.1|	PREDICTED: probable cinnamyl alcohol dehydrogenase 1-like [Fragaria vesca subsp. vesca]	71.03	3e-147	sp|Q9CAI3|CADH1_ARATH	Probable cinnamyl alcohol dehydrogenase 1 OS=Arabidopsis thaliana GN=CAD1 PE=2 SV=1	74.37	2e-152	D7TVV9	D7TVV9_VITVI Putative uncharacterized protein OS=Vitis vinifera GN=VIT_02s0025g03100 PE=3 SV=1	SMc00680
314	gi|428170609|gb|EKX39533.1|	myosin [Guillardia theta CCMP2712]	160534	MEVGSNGAVGEISNDISQKKRTSSYKDNRLLVTSRIWLKVSDLRWVAGTVESVDEKNLTIRTEDGMLVSVPRGSNRISQRTPPGMVAIDDLTALPDLDEPNMLDSLCQRYLQHKIYTRTGPILVGMNPWQDLRLYAPEVLHSYRKQQMNSMPPHVFAVSETAFANLQAERKDQTILVSGDSGSGKTESTKFMMQYLAAVANHTQKTANIEQRVLQCNPVLEAFGNAKTLRNDNSSRFGKYIDINFDSSFAISGAKIDTYLLEKSRVVSQQPGERNFHIFYQLCSQVGKDAYFSNILALRPAEDFNYLYQGAHVTVSYKAANSFENTVEAFMAIGIPQNEQEEIFKVIGAVMHMGNIKISSDKDGNSVIDPNSTDAINCTRLLGCSHHDLINALMQRQIQ…	21|-	1.0|-	-|-	1|-	1|-	1|-	1|-	---	-	-	-	-	-	---	-	-	-	-	-	---	-	-	-	-	-	---	-	-	-	-	-	gi|428170609|gb|EKX39533.1|	100	0	gi|428170609|gb|EKX39533.1|	myosin [Guillardia theta CCMP2712]	39.1	7e-149	sp|P35579|MYH9_HUMAN	Myosin-9 OS=Homo sapiens GN=MYH9 PE=1 SV=4	40.16	5e-141	A9T6S0	A9T6S0_PHYPA Predicted protein OS=Physcomitrella patens subsp. patens GN=PHYPADRAFT_192171 PE=4 SV=1	SPCC645.05c
315	gi|224098417|ref|XP_002311166.1|	predicted protein [Populus trichocarpa] >gi|118485224|gb|ABK94472.1| unknown [Populus trichocarpa] >gi|118487624|gb|ABK95637.1| unknown [Populus trichocarpa] >gi|222850986|gb|EEE88533.1| predicted protein [Populus trichocarpa]	42197	MKVTVVSRSGREVIKGGLELSDSATVADLQEAIHKRTKKFYPARQRLTLPLPPGSKERPTVLNYKKNLKEYQDGNLDSLTILFKDLGPQVSYRTLFFFEYLGPLVLYPFFYYFPVYQFLGYKGEHIMHPVQTYALYYWCFHYFKRIMETFFVHRFSHATSPLSNVFRNCAYYWTFGSYIAYYVNHPLYTPVGDLQMKIGFGFGLVCQLANFYCHILLRNLRRPDGNGGYQIPSGFLFNIVTCANYTTEIYQWLGFNIATQTVAGYIFLVVAASIMTNWALAKHRRLKKLFDGKDGRPKYPRRWVILPPVL	47|26	6.5|6.5	1|1	1|1	1|1	1|1	1|1	---	---	-	-	-	-	---	---	-	-	-	-	---	---	-	-	-	-	---	---	-	-	-	-	gi|224098417|ref|XP_002311166.1|	100	3e-171	gi|224098417|ref|XP_002311166.1|	predicted protein [Populus trichocarpa] >gi|118485224|gb|ABK94472.1| unknown [Populus trichocarpa] >gi|118487624|gb|ABK95637.1| unknown [Populus trichocarpa] >gi|222850986|gb|EEE88533.1| predicted protein [Populus trichocarpa]	82.58	6e-145	sp|Q9M2U2|ECR_ARATH	Very-long-chain enoyl-CoA reductase OS=Arabidopsis thaliana GN=ECR PE=2 SV=1	100	3e-170	A9PDL9	A9PDL9_POPTR Predicted protein OS=Populus trichocarpa GN=POPTRDRAFT_720621 PE=2 SV=1	-
316	gi|307101932|gb|EFN50465.1|	hypothetical protein CHLNCDRAFT_142667 [Chlorella variabilis]	19752	MLAGQSLGPAGCGALGCSTPMLSPCPSGGAPLSPDAPRGLPTMHPHHHLPQHQAQQAQHSQAHTLAAALGQLAAQAGGRGPAPLAPPSPGAHHGLPPMHAGGGAAALNGSLPHHFYCPLTRQLMSDPVLAADGVTYERQAIAEWMAYKDVSPTTQLPLPHKVLSPNSVLRAGLLDLLRQHC	28|31	5.5|5.5	-|-	1|1	1|1	1|1	1|1	---	---	-	-	-	-	---	---	-	-	-	-	---	---	-	-	-	-	---	---	-	-	-	-	gi|307101932|gb|EFN50465.1|	100	6e-59	gi|307101932|gb|EFN50465.1|	hypothetical protein CHLNCDRAFT_142667 [Chlorella variabilis]	50	5e-14	sp|Q9FKG6|PUB52_ARATH	U-box domain-containing protein 52 OS=Arabidopsis thaliana GN=PUB52 PE=2 SV=1	100	5e-58	E1ZUN0	E1ZUN0_CHLVA Putative uncharacterized protein OS=Chlorella variabilis GN=CHLNCDRAFT_142667 PE=4 SV=1	-
317	gi|460369955|ref|XP_004230822.1|	PREDICTED: probable N-acetyl-gamma-glutamyl-phosphate reductase, chloroplastic-like [Solanum lycopersicum]	51265	MASLAALNSNLFNGGCLWKYQDELKVSKAGKLRIRVTSMASSSPAQSLQFADGKANKLDKLRVGVLGASGYTGSEIIRLLRNHPYFQITLMTADRKAGQSIESVFPHLVTQDLPNLVAVKDADFSAVDAVFCCLPHGTTQEIIKSLPTNLKVVDLSADFRLQDIAEYEEWYGQPHKATALQKEAVYGLTEISRREIQSARLVANPGCYPTSVQLPLIPLIKSNFIEVRNIIIDSKSGVSGAGRGAKEANLYTEIAEGIHSYGITRHRHVPEIEQGLSEAANSKVTVSFTPHLMPMSRGMQSTIYVEMAPGMTTQDLKDHLGNYYEHEEFVVLLKNKEVPHTRHVRGSNYCLMNVFPDRIPGRAIIISVIDNLVKGASGQALQNLNLMMGIPENLGLGCL…	64|-	5.7|-	-|-	2|-	2|-	2|-	2|-	---	-	1	-	-	-	---	-	-	-	-	-	---	-	1	-	-	-	---	-	-	-	-	-	gi|460369955|ref|XP_004230822.1|	100	0	gi|460369955|ref|XP_004230822.1|	PREDICTED: probable N-acetyl-gamma-glutamyl-phosphate reductase, chloroplastic-like [Solanum lycopersicum]	72.87	1e-162	sp|Q6AV34|ARGC_ORYSJ	Probable N-acetyl-gamma-glutamyl-phosphate reductase, chloroplastic OS=Oryza sativa subsp. japonica GN=Os03g0617900 PE=1 SV=1	91.09	0	A7WPL0	A7WPL0_TOBAC N-acetyl-gamma-glutamyl-phosphate reductase OS=Nicotiana tabacum GN=MC118 PE=2 SV=1	PA0662
318	gi|224097670|ref|XP_002311035.1|	predicted protein [Populus trichocarpa] >gi|222850855|gb|EEE88402.1| predicted protein [Populus trichocarpa]	180588	MFQKSGREEDEEELKWAAIERLPTYDRLRKGMLKQVRDSGSVRYEEFDVANLDVHGRKQLIESILKVAEEDNEIFLRKLRERTDRVGIVTPKIEVRFEHLSVEGDAYVGTRALPTLVNVAVNKIEGLLGFLRLSPSKKRVVNILHDVSGIVEPMRMTLLLGPPGSGKTTLLQALSGKRDRELRVSGKVTYCGHELHEFVPQRTCAYISQHDLHHGEMTVRETLDFSGRCLGVGARYELLAELLRREKEAGIKPDPEIDAFMKAIAMEGQEASLVTDYVLKILGMDICADITVGDDMRRGISGGQKKRVTTGEMLVGPAKALFMDEISTGLDSSTTYQIVKFMRQMVHILDVTMIISLLQPAPETYDLFDDIILLSEGQIVYQGPREEVLEFFESVGFKC…	-|30	-|1.6	-|14	-|1	-|1	-|1	-|1	-	---	-	-	-	-	-	---	-	-	-	-	-	---	-	-	-	-	-	---	-	-	-	-	gi|224097670|ref|XP_002311035.1|	100	0	gi|224097670|ref|XP_002311035.1|	predicted protein [Populus trichocarpa] >gi|222850855|gb|EEE88402.1| predicted protein [Populus trichocarpa]	73.13	0	sp|Q2PCF1|PDR2_NICPL	Pleiotropic drug resistance protein 2 OS=Nicotiana plumbaginifolia GN=PDR2 PE=2 SV=1	100	0	B9HL22	B9HL22_POPTR Predicted protein OS=Populus trichocarpa GN=POPTRDRAFT_803129 PE=4 SV=1	YDR406w_3
319	gi|168026669|ref|XP_001765854.1|	predicted protein [Physcomitrella patens subsp. patens] >gi|162683031|gb|EDQ69445.1| predicted protein [Physcomitrella patens subsp. patens]	53427	MAMLIHIPDLQITFSYHLTLHVCSSMRVLFQGPAAAAAAVAAQKGWLLTQKTCHEMLLKGYPISPLVLWKFNMEMRIGVAVLAVVALHGLFHVALVSAEEQAFAQTQVYGGSKEWTLWSAVVVGKVFCDQCIQNKVFPYAHPMSKAKVKVECKDASGNVVDYADASTNFLGDFIVSFKGKEDLTGCSVSLAGSPDSKCSIVGGGGKTVTLKSKFLFKALYVVDPLFYKPALPMEFCSKPKKGPSPPPSPSGGGITIPFPNRRPSTCSCLDWLRPDYKCYWPKDMQPWKTTVGTVFGKGAQQKYGSKTLAGGLLTEDELLRQAISAILNSRTNMHFYMSPRAIQRSFAKALYASEPTKAAQAKAFKDANNGYGKGKCLLVSCKW	-|15	-|2.6	-|-	-|1	-|1	-|1	-|1	-	---	-	-	-	-	-	---	-	-	-	-	-	---	-	-	-	-	-	---	-	-	-	-	gi|168026669|ref|XP_001765854.1|	100	0	gi|168026669|ref|XP_001765854.1|	predicted protein [Physcomitrella patens subsp. patens] >gi|162683031|gb|EDQ69445.1| predicted protein [Physcomitrella patens subsp. patens]	-	-	-	-	100	0	A9SHJ0	A9SHJ0_PHYPA Predicted protein OS=Physcomitrella patens subsp. patens GN=PHYPADRAFT_164903 PE=4 SV=1	-
320	gi|45433309|emb|CAD27458.1|	nucleosome assembly protein 1-like protein 1 [Oryza sativa]	54871	MGGDKENLDLSDLNASLPAAAAALSAEDRAGLVNALKDKLQSLAGQHTDVLEALSPNVRKRVEYLREIQGQHDEIELKFFEERAALEAKYQKLYEPLYTKRYNIVNGVVEVDGGNDEPASENAAEFKDADAKGVPDFWLTAMKTNEVLSEEIQERDEPALKYLKDIKWARIDDPKGFKLDFFFDTNPFFKNSVLTKTYHMVDEDEPILEKAIGTEIEWYPGKNLTQKILKKKPKKGSKNAKPITKTEVCESFFNFFSPPQVPDDDEDIDEDTADELQGQMEHDYDIGTTIRDKIIPHAVSWFTGEAVQSEDFDDMEDDEEDDEDDDEDEEEEEDEDEDEDDEEEKSKPKKKSAGKPKLPSKGGAQGGADQPADCKQQ	203|151	6.1|6.1	11|11	12|11	12|11	2|2	2|2	0.198	0.226	2	2	*	*	---	0.42	-	2	-	-	1.917	2.048	2	2	-	-	---	0.185	-	2	-	-	gi|45433309|emb|CAD27458.1|	100	4e-128	gi|45433309|emb|CAD27458.1|	nucleosome assembly protein 1-like protein 1 [Oryza sativa]	39.53	1e-06	sp|Q18240|SPR2_CAEEL	Suppressor of presenilin-2 OS=Caenorhabditis elegans GN=spr-2 PE=2 SV=2	100	4e-127	Q70Z21	Q70Z21_ORYSA Nucleosome assembly protein 1-like protein 1 OS=Oryza sativa GN=nap1_L1 PE=2 SV=1	-
321	gi|189345443|gb|ACD93061.1|	CP47 protein [Cheiropleuria integrifolia]	49791	VVLNDPGRSISVHPMHTAPVSGWAGSMAPYELAVFDPSDPVLDPMRRQGMFVIPFMTRIGITKSWGGWSITGDTVTDAGIWSYEGVAAAHIIPSGLLFLAAIRHWVHWDLDLFRDERTGKPSLDLPKIFGIHSFLSGVLRFASGAFHATGLFGPGIRVSDPYGLTGKVQPVDPARGAEGFDPFVPGGIASHHIAAGILGILAGLFHLSVRPPQRLYKALRMGNVETVLSSSIAAVSFAAFVVSGTTWYGSAATPIELFGPTRYQWDQGYFQQEIDRRIRASKAENSGLSEAWSKIPEKSAFYDYIGNNPAKGGLFRAGATDNGDGIAVGWLGHAVSKDKEGHELLVRRMPTFFETFPVVLVDGEGVVRADVPFRRAESKYSVEQVGVTVESHGGELDGT…	-|819	-|10.0	-|-	-|39	-|1	-|4	-|1	-	---	-	-	-	-	-	---	-	-	-	-	-	---	-	-	-	-	-	---	-	-	-	-	gi|189345443|gb|ACD93061.1|	100	0	gi|189345443|gb|ACD93061.1|	CP47 protein [Cheiropleuria integrifolia]	91.65	0	sp|A2T359|PSBB_ANGEV	Photosystem II CP47 chlorophyll apoprotein OS=Angiopteris evecta GN=psbB PE=3 SV=1	100	0	D8KWY4	D8KWY4_9MONI Photosystem II CP47 chlorophyll apoprotein (Fragment) OS=Cheiropleuria integrifolia GN=psbB PE=3 SV=1	-
322	gi|161788874|dbj|BAF95071.1|	voltage-dependent anion channel [Nicotiana tabacum]	35788	MVKGPGLYSDIGKKARDLLYRDYVSDHKFTVTTYSSTGVAITSSGLKKGELFLADVNTQLKNKNVTTDVKVDTNSNVYTTITVDEPAPGLKTIVSFVLPDQRSGKVELQYLHEYAGISTGIGLTASPLVNFSGVAGNNTVALGTDLSFDTASGNFTKCNAGLSFSTSDLIASLALNDKGDTLSASYYHTVKPVTNTAVGAELTHSFSSNENTLTIGTQHLLDPLTTVKARVNSYGKASALIQHEWRPKSLFTISGEVDTRAIEKSAKIGLAVALKP	119|98	12.0|11.6	-|-	10|5	3|2	3|3	2|2	---	1.731	-	2	-	-	---	0.786	-	2	-	-	---	0.626	-	2	-	-	---	0.81	-	2	-	-	gi|161788874|dbj|BAF95071.1|	100	1e-157	gi|161788874|dbj|BAF95071.1|	voltage-dependent anion channel [Nicotiana tabacum]	95.65	7e-153	sp|P42056|VDAC2_SOLTU	Mitochondrial outer membrane protein porin of 36 kDa OS=Solanum tuberosum PE=1 SV=2	100	1e-156	A9CM21	A9CM21_TOBAC Voltage-dependent anion channel OS=Nicotiana tabacum GN=NtVDAC2 PE=2 SV=1	-
323	gi|302816394|ref|XP_002989876.1|	hypothetical protein SELMODRAFT_272095 [Selaginella moellendorffii] >gi|300142442|gb|EFJ09143.1| hypothetical protein SELMODRAFT_272095 [Selaginella moellendorffii]	54942	MRKLVAEKLGRLVSNAGGQIRRGFASAAPLASESPPLKKTVLYDFHVENGAKMVPFAGWSMPLLYKDTILNSTLNCRQNGSLFDVSHMCGLTLKGKDAIPFLETLVVGDIAGLSDGSCSLSAFTNEKGGTIDDTVITKVKDGHVYLVVNAGCRDKDLAHIGKHLEAYKSKGKDVSSHVHDERSLLALQGPLAASTLQHLVKEDLSKVYFGNFRILSVNGAECFITRTGYTGEDGFEISVPSEHALELAKALLEKSEGKILLTGLGARDSLRLEAGLCLYGHDMDDNTSVVEAGVAWTIGKRRRAEGGFLGADVILKQLKEGVSRKRVGMISEGAPARAHCPIYNASDEVIGEVTSGGFSPCLKKNIAMGYVSTGNHKEGTPISVAVRDKKNAGVITKMP…	23|-	3.4|-	1|-	1|-	1|-	1|-	1|-	---	-	-	-	-	-	---	-	-	-	-	-	---	-	-	-	-	-	---	-	-	-	-	-	gi|302816394|ref|XP_002989876.1|	100	0	gi|302816394|ref|XP_002989876.1|	hypothetical protein SELMODRAFT_272095 [Selaginella moellendorffii] >gi|300142442|gb|EFJ09143.1| hypothetical protein SELMODRAFT_272095 [Selaginella moellendorffii]	73.24	6e-156	sp|P54260|GCST_SOLTU	Aminomethyltransferase, mitochondrial OS=Solanum tuberosum GN=GDCST PE=2 SV=1	100	0	D8T2P9	D8T2P9_SELML Aminomethyltransferase OS=Selaginella moellendorffii GN=SELMODRAFT_272095 PE=3 SV=1	SPAC31G5.14
324	gi|9294054|dbj|BAB02011.1|	unnamed protein product [Arabidopsis thaliana]	40802	MVNKITNNYIFPRKPLFQLMMVMISLHFSTPPLAFLKSDSNSRFLKNPNPNFIQFTPKSQLLFPQRLNFNTGTNLNRRTLSCYGIKDSSETTKSAPSLDSGDGGGGDGGDDDKGEVEEKNRLFPEWLDFTSDDAQTVFVAIAVSLAFRYFIAEPRYIPSLSMYPTFDVGDRLVAEKVSYYFRKPCANDIVIFKSPPVLQEVGYTDADVFIKRIVAKEGDLVEVHNGKLMVNGVARNEKFILEPPGYEMTPIRVPENSVFVMGDNRNNSYDSHVWGPLPLKNIIGRSVFRYWPPNRVSGTVLEGGCAVDKQ	33|45	4.2|9.4	8|4	1|2	1|2	1|2	1|2	---	---	-	-	-	-	---	---	-	-	-	-	---	---	-	-	-	-	---	---	-	-	-	-	gi|9294054|dbj|BAB02011.1|	100	3e-170	gi|9294054|dbj|BAB02011.1|	unnamed protein product [Arabidopsis thaliana]	100	3e-159	sp|Q8H0W1|PLSP1_ARATH	Chloroplast processing peptidase OS=Arabidopsis thaliana GN=PLSP1 PE=2 SV=2	91.38	2e-144	D7L560	D7L560_ARALL Signal peptidase I family protein (Fragment) OS=Arabidopsis lyrata subsp. lyrata GN=ARALYDRAFT_479972 PE=3 SV=1	alr2975
325	gi|26986106|emb|CAD27443.1|	vacuolar ATPase subunit B [Mesembryanthemum crystallinum]	59986	MGAPNNLEMDEGNLEIGMEYRTVSGVAGPLVILEKVKGPKYQEIVNIRLGDGTTRRGQVLEVDGEKAVVQVFEGTSGIDNKYTTVQFTGEVLKTPVSLDMLGRIFNGSGKPIDNGPPILPEAYLDISGSSINPSERTYPEEMIQTGISTIDVMNSIARGQKIPLFSAAGLPHNEIAAQICRQAGLVKRLEKTENLMEGGEEDNFAIVFAAMGVNMETAQFFKRDFEENGSMERVTLFLNLANDPTIERIITPRIALTTAEYLAYECGKHVLVILTDMSSYADALREVSAAREEVPGRRGYPGYMYTDLATIYERAGRIEGRSGSITQIPILAMPNDDITHPTPDLTGYITEGQIYIDRQLHNRQIYPPINVLPSLSRLMKSAIGEGMTRRDHSDVSNQL…	1025|813	28.5|24.2	9|9	44|31	9|4	9|8	1|1	1.759	1.776	9	2	*	-	0.576	0.507	6	2	*	-	0.905	0.892	9	2	-	-	0.904	0.763	6	2	-	-	gi|26986106|emb|CAD27443.1|	100	0	gi|26986106|emb|CAD27443.1|	vacuolar ATPase subunit B [Mesembryanthemum crystallinum]	96.89	0	sp|Q43433|VATB2_GOSHI	V-type proton ATPase subunit B 2 (Fragment) OS=Gossypium hirsutum PE=2 SV=1	100	0	Q8GUB5	Q8GUB5_MESCR Vacuolar ATPase subunit B OS=Mesembryanthemum crystallinum GN=vha-B PE=2 SV=1	YBR127c
326	gi|302835738|ref|XP_002949430.1|	hypothetical protein VOLCADRAFT_89878 [Volvox carteri f. nagariensis] >gi|300265257|gb|EFJ49449.1| hypothetical protein VOLCADRAFT_89878 [Volvox carteri f. nagariensis]	205837	MNWELTLDDIYLTCELNCSLSHVAAMEEYLAASAGDFAELRAQLESVVSPSGQKVAWEVRTCRRASNRSPRIGTFAGGGSGGSGAGHSAAARMQAFLGMMRRVVSCGGAPGWRGEGVAARWTPYITKYFPLPVRRASEQRQARAEKARQAMVEEKLARLAQANQSRQTVKSLMEERAGAIAARVDSKIARSAELRQAHLAERVQKAVEETKKVAEVAFINQMLEMDKKLALQEKLEEGESRRRQALEALQQRGKGAAAAVEEAQERRKLLEAERREQLADRQRRKMAAQAKLEEERRAAAAAREAASRAQRAAAAQVAEARQRLRDVLSIRIEERLREAAARRAQHLELIKERAALGKDLYERRTMDGNTTSPRSPQSRYTRPPSPEVASAGAGGHTAA…	35|32	1.0|1.0	-|-	2|1	2|1	1|1	1|1	---	---	-	-	-	-	---	---	-	-	-	-	---	---	-	-	-	-	---	---	-	-	-	-	gi|302835738|ref|XP_002949430.1|	100	6e-27	gi|302835738|ref|XP_002949430.1|	hypothetical protein VOLCADRAFT_89878 [Volvox carteri f. nagariensis] >gi|300265257|gb|EFJ49449.1| hypothetical protein VOLCADRAFT_89878 [Volvox carteri f. nagariensis]	27.31	4e-13	sp|Q9BY12|SCAPE_HUMAN	S phase cyclin A-associated protein in the endoplasmic reticulum OS=Homo sapiens GN=SCAPER PE=1 SV=1	100	0	D8TSW6	D8TSW6_VOLCA Putative uncharacterized protein OS=Volvox carteri GN=VOLCADRAFT_89878 PE=4 SV=1	-
327	gi|270313549|gb|ACZ73829.1|	spermidine synthase [Olea europaea]	43810	MSSTQEANLTELPVKRPREEAVEENGGISVTMEESNGVAAAECISTIIPGWFSEISPMWPGEAHSLKVEKILFQGKSDYQNVIVFQSSTYGKVLVLDGVIQLTERDECAYHEMITHLPLCSIPNPKKVLVIGGGDGGVLREVSRHSSVEKIDICEIDKMVVDVSKQFFPKVAVGYDDPRVTLHIGDGVAFLKAVPDPAVIVDSSDPIGPAQELFEKPFFQSVAKSLRPGGVVCTQAESIWLHMHIIEDIVANCRQIFKGSVNYAWTSVPTYPSGVIGFMLCSTEGPAVDFKHPINPIDADCSHVNTKRPLKFYNSEMHSAAFCLPLFAKRVIESKAN	137|-	7.7|-	3|-	5|-	4|-	2|-	1|-	1.902	-	4	-	-	-	1.217	-	2	-	-	-	0.706	-	4	-	-	-	1.474	-	2	-	-	-	gi|270313549|gb|ACZ73829.1|	100	0	gi|270313549|gb|ACZ73829.1|	spermidine synthase [Olea europaea]	87.88	4e-150	sp|O82147|SPDE_COFAR	Spermidine synthase OS=Coffea arabica PE=2 SV=1	100	0	D2K8S6	D2K8S6_OLEEU Spermidine synthase OS=Olea europaea PE=2 SV=1	SPBC12C2.07c
328	gi|154423136|gb|ABS81469.1|	ribulose-1,5-bisphosphate carboxylase/oxygenase large subunit [Hydrodictyon reticulatum]	50360	XPVKDTDILAAFRMTPQPGVPAEECGAAVAAESSTGTWTTVWTDGLTSLDRYKGRCYDIEPVAGEDNQYIAYVAYPIDLFEEGSVTNLFTSIVGNVFGFKALRALRLEDLRIPPAYAKTFVGPPHGIQVERDKLNKYGRGLLGCTIKPKLGLSAKNYGRAVYECLRGGLDFTKDDENVNSQPFMRWRDRFLFVAEAIYKAQAETGEIKGHYLNATAGTCEEMLKRAQCAKELGVPIIMHDYLTGGFTANTSLAVYCRDHGLLLHIHRAMHAVIDRQRNHGIHFRVLAKALRMSGGDHLHSGTVVGKLEGEREVTLGFVDLMRDDYIEKDRSRGIYFTQDWCSMSGVMPVASGGIHVWHMPALVEIFGDDACLQFGGGTLGHPWGNAPGAVANRVALEAC…	466|-	10.2|-	-|-	48|-	1|-	5|-	1|-	---	-	-	-	-	-	---	-	-	-	-	-	---	-	-	-	-	-	---	-	-	-	-	-	gi|154423136|gb|ABS81469.1|	100	0	gi|154423062|gb|ABS81432.1|	ribulose-1,5-bisphosphate carboxylase/oxygenase large subunit [Hydrodictyon africanum] >gi|154423070|gb|ABS81436.1| ribulose-1,5-bisphosphate carboxylase/oxygenase large subunit [Hydrodictyon reticulatum] >gi|154423078|gb|ABS81440.1| ribulose-1,5-bisphosphate carboxylase/oxygenase large subunit [Pediastrum duplex]	96.76	0	sp|Q1KVV0|RBL_SCEOB	Ribulose bisphosphate carboxylase large chain OS=Scenedesmus obliquus GN=rbcL PE=3 SV=1	100	0	B3EZ52	B3EZ52_9CHLO Ribulose-1,5-bisphosphate carboxylase/oxygenase large subunit (Fragment) OS=Hydrodictyon patenaeforme GN=rbcL PE=3 SV=1	alr1524
329	gi|225440751|ref|XP_002281147.1|	PREDICTED: ubiquitin-conjugating enzyme E2 variant 1D-like isoform 1 [Vitis vinifera]	19838	MTLGSGGSSVVVPRNFRLLEELERGEKGIGDGTVSYGMDDGDDIYMRSWTGTIIGPHNVTVHEGRIYQLKLFCDKDYPEKPPSVRFHSRINMTCVNHETGVVEPKKFGILANWQREYTMEDILTQLKKEMAAPQNRKLVQPPEGTYF	-|411	-|38.1	-|7	-|14	-|4	-|4	-|2	-	1.107	-	2	-	-	-	1.104	-	2	-	-	-	0.799	-	2	-	-	-	0.827	-	2	-	-	gi|225440751|ref|XP_002281147.1|	100	1e-79	gi|225440751|ref|XP_002281147.1|	PREDICTED: ubiquitin-conjugating enzyme E2 variant 1D-like isoform 1 [Vitis vinifera]	92.52	4e-72	sp|Q9SJ44|UEV1C_ARATH	Ubiquitin-conjugating enzyme E2 variant 1C OS=Arabidopsis thaliana GN=UEV1C PE=1 SV=1	99.32	1e-76	D7TH48	D7TH48_VITVI Putative uncharacterized protein OS=Vitis vinifera GN=VIT_08s0007g02580 PE=4 SV=1	-
330	gi|452823025|gb|EME30039.1|	LL-diaminopimelate aminotransferase [Galdieria sulphuraria]	58798	MIHSSSSIWCFHSTFIPKLNNSVIQPKNNRCQVKKRFSRSSPLLVASTPTASKQMTRVPRNPNLAKLEAGYLFPEIARRRNAYLEKHPTANIISLGIGDTTQPIPAHVAQKMAERALALATPEGYSGYGPDLGDPELRKKISERLYGGKVDIDEVFVSDGAKCDIGRLQMMFGPGVDIAVQDPSYPVYVDSAVIVGQTGTKNGSLYENIRYMTCLPENNFFPQLDKVPRADIIFFCSPNNPTGAAATREQLEKLVQYAKNNGSIIVYDAAYAPFIRDENIPQSIFEIEGANEVALECNSFSKYAGFTGVRLGWVVCPKSLQFADGSFVHKDFRRIFTTCFNGASSLAQAGGLAVLDDKGMQEVRRLTDYYLENAHILSSAMRDLGLKVFGGENSPYVWV…	47|-	2.6|-	-|-	2|-	2|-	1|-	1|-	---	-	1	-	-	-	---	-	1	-	-	-	---	-	1	-	-	-	---	-	1	-	-	-	gi|452823025|gb|EME30039.1|	100	0	gi|452823025|gb|EME30039.1|	LL-diaminopimelate aminotransferase [Galdieria sulphuraria]	60.99	4e-131	sp|Q93ZN9|DAPAT_ARATH	LL-diaminopimelate aminotransferase, chloroplastic OS=Arabidopsis thaliana GN=DAP PE=1 SV=1	63.81	6e-141	B8BT02	B8BT02_THAPS Aspartate aminotransferase OS=Thalassiosira pseudonana GN=THAPSDRAFT_31394 PE=3 SV=1	alr5103
331	gi|14594931|emb|CAC43326.1|	putative beta5 proteasome subunit [Nicotiana tabacum]	21754	ASMGGYISSQSVKKIIEINPYMLGTMAGGAADCQFWHRNLGIKCRLHELANKRRTSVAGASKLLANILYSYRGMGLSVGTMIAGWDEKGPGLYYVDSEGGRLKGNRFSVGSGSPYAYGVLDSGYRFDLSVEEAAELARRAIYHATFRDGASGGVASVYHVGPNGWKKLSGDDVG	37|-	10.9|-	5|-	1|-	1|-	1|-	1|-	---	-	-	-	-	-	---	-	-	-	-	-	---	-	-	-	-	-	---	-	-	-	-	-	gi|14594931|emb|CAC43326.1|	100	7e-97	gi|14594931|emb|CAC43326.1|	putative beta5 proteasome subunit [Nicotiana tabacum]	93.1	4e-93	sp|Q9LIP2|PSB5B_ARATH	Proteasome subunit beta type-5-B OS=Arabidopsis thaliana GN=PBE2 PE=1 SV=1	100	6e-96	Q93X31	Q93X31_TOBAC Putative beta5 proteasome subunit (Fragment) OS=Nicotiana tabacum GN=b5 PE=2 SV=1	SPAC4A8.13c
332	gi|10241432|emb|CAC09353.1|	H0212B02.8 [Oryza sativa Indica Group]	46039	MAAKLSLLLPVTCFILFVLHAVHVEARPDPAAFGDSDNGFYTLFVFGDSFADTGNLPKRRLSEQSREWYYPYGRDRGNNRPTGRFSNAMVQSDLIARMLGRHEAPPTYRRVDNYVHPHGMNFAAGGSGVFKLPSGAPTLDKQVDHFRDLVQDGTITRRNLRNSIALVAVSGNDYARLANVNDTSKMIKFVDEVTSEIAKQVHRLKNNGARKILVNNLHPVGCTPWVTRPGNYSGCSSTGNMGAYLHGSNLQQKLSHLDYVHHVDLNTAFSNIVNPDQGSKHKVSSQFEHKMQPCCESLDPNGFCGQKGHDGKDLFSVCNDPEKYFYWDDVHPTEAGWKAVMQQLEGPIKKFLGIN	-|18	-|1.4	-|-	-|5	-|5	-|1	-|1	-	---	-	-	-	-	-	---	-	-	-	-	-	---	-	-	-	-	-	---	-	-	-	-	gi|10241432|emb|CAC09353.1|	100	0	gi|218195710|gb|EEC78137.1|	hypothetical protein OsI_17688 [Oryza sativa Indica Group]	34.29	2e-44	sp|Q9LZS7|GDL71_ARATH	GDSL esterase/lipase At5g03610 OS=Arabidopsis thaliana GN=At5g03610 PE=2 SV=1	100	0	A2XYB6	A2XYB6_ORYSI Putative uncharacterized protein OS=Oryza sativa subsp. indica GN=OsI_17695 PE=4 SV=1	all3634
333	gi|449443163|ref|XP_004139350.1|	PREDICTED: probable lactoylglutathione lyase, chloroplast-like [Cucumis sativus]	48649	MVRITPMASFSVRPSLSAFRFAGFSRSGLSLSSFNTTRRIALLQLGSAVPQSQYFGLKAFDMLRGEGSNIGMTVAGNAAQASTSSSSENLLDWVKQDKRRMLHVVYRVGDLDKTIKFYTECLGMKLLRKRDIPEEKYTNAFLGFGPEDSHFVIELTYNYGVDKYDIGTAFGHFGIAVEDVYKTVELIKAKGGKVTREAGPVKGGRTVIAFVEDPDGYKFELIERGPTPEPLCQVMLRVGDLDRSIDFYKKAYGMELLRKRDNPDYKYTIAMMGYGPEDKNAVMELTYNYGVTDYEKGNAYAQIAIGTDDVYRTAEAVKLSGGKVTREPGPLPGINTKITACLDPDGWKTVFVDNVDFLKELE	91|-	15.2|-	1|-	5|-	1|-	5|-	1|-	---	-	1	-	-	-	---	-	1	-	-	-	---	-	1	-	-	-	---	-	1	-	-	-	gi|449443163|ref|XP_004139350.1|	100	0	gi|449443163|ref|XP_004139350.1|	PREDICTED: probable lactoylglutathione lyase, chloroplast-like [Cucumis sativus]	76.24	2e-159	sp|Q8W593|LGUC_ARATH	Probable lactoylglutathione lyase, chloroplast OS=Arabidopsis thaliana GN=At1g67280 PE=2 SV=1	89.79	2e-149	B9ILR3	B9ILR3_POPTR Predicted protein OS=Populus trichocarpa GN=POPTRDRAFT_737640 PE=4 SV=1	RSc0520
334	gi|11134035|sp|P93566.1|PSBP_SOLTU	RecName: Full=Oxygen-evolving enhancer protein 2, chloroplastic; Short=OEE2; AltName: Full=23 kDa subunit of oxygen evolving system of photosystem II; AltName: Full=23 kDa thylakoid membrane protein; AltName: Full=OEC 23 kDa subunit; Flags: Precurso	34851	MAASTQCFLHQYHALRSSPARTSSVPSPKPNQLICRAQKQDDANNTSNAVSRRLALTLLIGTAAIGSKVSPADAAYGEAANVFGKPKENTDFLPYNGDGFKLQIPAKWNPSKEIEFPGQVLRYEDNFDSTSNLMVAVTPTDKKSITDYGSPEEFLSKVDYLLGKQAYFGKTDSEGGFESGAVATANLLEASSATVGGKQYYYLSVLTRTADGDEGGKHQLITATVNDGKLYICKAQAGDKRWFKGAKKFVENAATSFSIA	85|-	15.8|-	-|-	8|-	2|-	3|-	1|-	---	-	-	-	-	-	---	-	-	-	-	-	---	-	-	-	-	-	---	-	-	-	-	-	gi|11134035|sp|P93566.1|PSBP_SOLTU	100	2e-141	gi|11134035|sp|P93566.1|PSBP_SOLTU	RecName: Full=Oxygen-evolving enhancer protein 2, chloroplastic; Short=OEE2; AltName: Full=23 kDa subunit of oxygen evolving system of photosystem II; AltName: Full=23 kDa thylakoid membrane protein; AltName: Full=OEC 23 kDa subunit; Flags: Precursor >gi|1771778|emb|CAA67696.1| 23 kDa oxygen evolving protein of photosystem II [Solanum tuberosum]	100	6e-142	sp|P93566|PSBP_SOLTU	Oxygen-evolving enhancer protein 2, chloroplastic OS=Solanum tuberosum GN=PSBP PE=2 SV=1	91.67	2e-18	C0Z2T4	C0Z2T4_ARATH AT1G06680 protein OS=Arabidopsis thaliana GN=AT1G06680 PE=4 SV=1	-
335	gi|13236786|gb|AAK14698.1|	ATP synthase beta subunit [Burretiokentia hapala]	60442	MRTNPTTSSPVVSTLEEKNLGRIAQIIGPVLDVVFPPGKMPNIYNALVVKGRDTVGQQINVTCEVQQLLGNNRVRAVAMSATDGLMRGMEVIDTGAPLSVPVGGATLGRIFNVLGEPVDNLGPVDTRTTSPIHRSAPAFIQLDTKLSIFETGIKVVDLLAPYXRGGKIGLFGGAGVGKTVLIMELINNIAKAHGGVSVFGGVGERTREGNDLYMEMKESGVINEKNIAESKVALVYGQMNEPPGARMRVGLTALTMAEYFRDVNEQDVLLFIDNIFRFVQAGSEVSALLGRMPSAVGYQPTLSTEMGSLQERITSTKDGSITSIQAVYVPADDLTDPAPATTFAHLDATTVLSRVLAAKGIYPAVDPLDSTSTMLQPRIVGEEHYETAQRVKQTSQRYK…	7487|5475	51.6|44.4	-|-	267|211	4|5	19|16	2|1	1.776	2.669	3	4	-	*	1.035	1.188	3	4	-	-	0.632	0.578	3	4	-	*	1.28	1.661	3	4	-	*	gi|13236786|gb|AAK14698.1|	100	0	gi|13236786|gb|AAK14698.1|	ATP synthase beta subunit [Burretiokentia hapala]	99.6	0	sp|Q7HDI4|ATPB_ACRAL	ATP synthase subunit beta, chloroplastic OS=Acrocomia aculeata GN=atpB PE=3 SV=1	100	0	Q9BA74	Q9BA74_9LILI ATP synthase subunit beta, chloroplastic OS=Burretiokentia hapala GN=atpB PE=3 SV=1	all5039
336	gi|460394682|ref|XP_004242929.1|	PREDICTED: uncharacterized protein LOC101245558 [Solanum lycopersicum]	137887	MAPMVTIATTNVSVTPGAVLLTRRNQCLSKYDVSRKSSKQTLPTPKYILPLSTSIKLFPHFRVGCILRHKLRGLVVSATETDVAVEEVEATAADDGSGGVAEASSDAAEISEESSVSDVSPRSVQSKRSRPARKSEMPPVKNEDLIPGATFPGKVRSIQPFGAFIDFGAFTDGLVHVSRLSDSYVKDVGSIVSVGQEVTVRLVEANTETGRISLTMRESDDPSRPQQQKDAPTNSDRPRTQRKSTQRNNQRRDEKVSKFVKGQDLEGTVKNLTRSGAFISLPEGEEGFLPASEETDEVFGIIDSGSSLTVGQEVNVRVLRIARGQVTLTMKKEEAASELDSKLNQGVVYSATNPFLLAFRSNKEISSFLDEREKEDEQAEQSKEDAQESDAATIKIDVL…	131|89	2.3|3.1	-|-	5|3	4|2	2|3	1|2	5.717	---	3	-	-	-	5.425	---	3	-	*	-	0.141	---	3	-	-	-	3.026	---	3	-	-	-	gi|460394682|ref|XP_004242929.1|	100	0	gi|460394682|ref|XP_004242929.1|	PREDICTED: uncharacterized protein LOC101245558 [Solanum lycopersicum]	68.37	1e-75	sp|A2BW76|EFTS_PROM5	Elongation factor Ts OS=Prochlorococcus marinus (strain MIT 9515) GN=tsf PE=3 SV=1	86.19	0	B9RKL9	B9RKL9_RICCO Elongation factor Ts OS=Ricinus communis GN=RCOM_1051260 PE=3 SV=1	sll1261
337	gi|224053579|ref|XP_002297882.1|	predicted protein [Populus trichocarpa] >gi|222845140|gb|EEE82687.1| predicted protein [Populus trichocarpa]	26537	AGVIERRQVIMLSVGLLAGAALQHSSSNKDAAAMAAEFTDMPALRGKDYGKTKMRYPDYTETESGLQYKDLRAGNGPLPKMGETVVVDWDGYTIGYYGRIFEARNKTKGGSFEGDDKDFFKFRLGSREVIPAFEEAVSGMAPGGIRRIIVPPELGYPENDYNKSGPRPTTFSGQRALDFVLRNQGLIDKTLLFDIELLKVIP	81|-	11.4|-	2|-	4|-	4|-	2|-	2|-	1.535	-	2	-	-	-	0.683	-	2	-	-	-	1.208	-	2	-	-	-	1.139	-	2	-	-	-	gi|224053579|ref|XP_002297882.1|	100	4e-114	gi|224053579|ref|XP_002297882.1|	predicted protein [Populus trichocarpa] >gi|222845140|gb|EEE82687.1| predicted protein [Populus trichocarpa]	79.21	6e-90	sp|Q9LYR5|FKB19_ARATH	Peptidyl-prolyl cis-trans isomerase FKBP19, chloroplastic OS=Arabidopsis thaliana GN=FKBP19 PE=1 SV=1	100	4e-113	B9GMU6	B9GMU6_POPTR Peptidyl-prolyl cis-trans isomerase (Fragment) OS=Populus trichocarpa GN=POPTRDRAFT_179380 PE=4 SV=1	RSc0784
338	gi|255571289|ref|XP_002526594.1|	utp-glucose-1-phosphate uridylyltransferase, putative [Ricinus communis] >gi|223534088|gb|EEF35806.1| utp-glucose-1-phosphate uridylyltransferase, putative [Ricinus communis]	64243	MAAATDNKLTQLKSSVAELNQISENEKNGFISLVARYLSGEAQQVEWSKIQTPTDEVVVPYDILAPVPEDPAETKKLLDKLVVLKLNGGLGTTMGCTGPKSVIEVRNGLTFLDLIVIQIENLNSKYGCDVPLLLMNSFNTHDDTQKIIEKYSKSNIQIHTFNQSQYPRLVTEDFQPLPLKGQSGKDGWYPPGHGDVFPSLRNSGKLDALLSQGKEYVFAANSDNLGAIVDLKILNHLIRNKNEYCMEVTPKTLADVKGGTLISYEGKVQLLEIAQVPDEHVNEFKSIEKFKIFNTNNLWVSLSAIKRLVEADALKMEIIPNPKEVDGVKVLQLETAAGAAIRFFDHAIGINVPRSRFLPVKATSDLLLVQSDLYTLDGGFVIRNKARKNPANPSVELGP…	85|112	10.4|14.3	-|-	6|7	2|2	4|5	1|1	---	---	-	-	-	-	---	---	-	-	-	-	---	---	-	-	-	-	---	---	-	-	-	-	gi|255571289|ref|XP_002526594.1|	100	0	gi|255571289|ref|XP_002526594.1|	utp-glucose-1-phosphate uridylyltransferase, putative [Ricinus communis] >gi|223534088|gb|EEF35806.1| utp-glucose-1-phosphate uridylyltransferase, putative [Ricinus communis]	87.55	0	sp|Q9SDX3|UGPA_MUSAC	UTP--glucose-1-phosphate uridylyltransferase OS=Musa acuminata GN=UGPA PE=2 SV=1	100	0	B9SKS5	B9SKS5_RICCO Utp-glucose-1-phosphate uridylyltransferase, putative OS=Ricinus communis GN=RCOM_1605130 PE=4 SV=1	YKL035w
339	gi|118483904|gb|ABK93842.1|	unknown [Populus trichocarpa] >gi|118489953|gb|ABK96773.1| unknown [Populus trichocarpa x Populus deltoides]	11791	MDGHDADDAKKSTADMTAFVQNLLQQMQSRFQTMSDSIVTKIDEMGNRIDELEQSINDLRTEMGVEGSPSPSVPPKVKEEPKPGNDSA	41|-	13.6|-	5|-	2|-	2|-	1|-	1|-	---	-	-	-	-	-	---	-	-	-	-	-	---	-	-	-	-	-	---	-	-	-	-	-	gi|118483904|gb|ABK93842.1|	100	3e-30	gi|118483904|gb|ABK93842.1|	unknown [Populus trichocarpa] >gi|118489953|gb|ABK96773.1| unknown [Populus trichocarpa x Populus deltoides]	54.39	2e-10	sp|Q5RDI2|HSBP1_PONAB	Heat shock factor-binding protein 1 OS=Pongo abelii GN=HSBP1 PE=3 SV=1	100	4e-29	A9PK70	A9PK70_9ROSI Putative uncharacterized protein OS=Populus trichocarpa x Populus deltoides PE=4 SV=1	-
340	gi|257219554|gb|ACV50430.1|	copper chaperone [Jatropha curcas]	13000	MSQTVVLKVGMSCQGCVGAVKRVLGKMEGVESYDIDLQEQKVTVKGNVQPEAVLQTVSKTGKKTEFWEAEAPAAPETKPAETVSEPAETVAVA	688|522	15.1|15.1	1|1	23|21	23|21	1|1	1|1	1.025	0.782	19	13	-	-	0.961	1.045	15	12	-	-	0.504	0.494	16	13	*	-	0.376	0.458	17	12	-	*	gi|257219554|gb|ACV50430.1|	100	1e-32	gi|257219554|gb|ACV50430.1|	copper chaperone [Jatropha curcas]	46.43	4e-07	sp|Q9TT99|ATOX1_CANFA	Copper transport protein ATOX1 OS=Canis familiaris GN=ATOX1 PE=3 SV=1	100	1e-31	D3GC04	D3GC04_9ROSI Copper chaperone OS=Jatropha curcas GN=CCH PE=4 SV=1	-
341	gi|470134340|ref|XP_004303012.1|	PREDICTED: monodehydroascorbate reductase-like [Fragaria vesca subsp. vesca]	59370	MAEKTFKYVILGGGVSAGYAAREFSKQGVKPGELAVISKEAVAPYERPALSKAYLFPESPARLPGFHTCVGSGGERLLPDWYKEKGIELILSTEIVIVDLAGKTLVSGTGETFKFQILIIATGSTVVRLSDFGVKGADAKNIFYLREIDDADKLNDAIKAKKNGKAVIVGGGYIGLELGAALRINNLDVTMVYPEPWCMPRLFTSGIAAFYEGYYANKGVKIIKGTVASGFTSDSNGEVKEVHLKDGRVLEADIVVVGVGGRPLTSLFKGQVEEEKGGIKTDTFFKTSVPDVYAVGDVATFPLKLYNELRRVEHVDHARKSAEQAVKAIKASEEGKTVEVYDYLPYFYSRSFDLSWQFYGDNVGETVLFGDNNPTSPKPKFGTYWIKDGKVIGAFLEAG…	40|-	3.0|-	-|-	1|-	1|-	1|-	1|-	---	-	-	-	-	-	---	-	-	-	-	-	---	-	-	-	-	-	---	-	-	-	-	-	gi|470134340|ref|XP_004303012.1|	100	0	gi|470134340|ref|XP_004303012.1|	PREDICTED: monodehydroascorbate reductase-like [Fragaria vesca subsp. vesca]	83.87	0	sp|Q42711|MDARS_CUCSA	Monodehydroascorbate reductase, seedling isozyme OS=Cucumis sativus PE=2 SV=1	98.39	5e-63	H9N911	H9N911_FRAAN Monodehydroascorbate reductase (Fragment) OS=Fragaria ananassa GN=MDAR PE=2 SV=1	Cgl2652
342	gi|147856873|emb|CAN81335.1|	hypothetical protein VITISV_006230 [Vitis vinifera]	101464	MATMKYDILLLDCNTQIFAMDFLKEKTVXALWLKLEQLCIXKSLTXKLHLKQQLYXHHMIEGMSLEDHLTVFKEIGSDLETMEVKYDEEDLGLILLLSKXAMLMGNNASYKIVGIGTVKIKMFDGIVTTLSDVRRILDLKRHLISLSTLDSKGYKYIGEGGVLKVSKCVLVESTVIGDAVVATFSLLDGDVTRLWHMGLLKGCASYMLTIIDDFSRKFWVFFLKQKSEVLATFKEWNIMIEKQIGKQVKRFHTNNGLEFCYDELNVRCKLEGIVRHHTIRHTPQQNGVAEQMNRTLIEKVCCMLSNVGLPNYSDLNIFGCPAYAHVDNGKLEARSIKCVFIRYKSGVKGYKLWCLETKKVIVSRDVEFEIKSRSILESTSQSSSKMKSDEIGSLHKNDT…	28|-	1.7|-	-|-	1|-	1|-	1|-	1|-	---	-	-	-	-	-	---	-	-	-	-	-	---	-	-	-	-	-	---	-	-	-	-	-	gi|147856873|emb|CAN81335.1|	100	0	gi|147856873|emb|CAN81335.1|	hypothetical protein VITISV_006230 [Vitis vinifera]	46.54	3e-65	sp|P10978|POLX_TOBAC	Retrovirus-related Pol polyprotein from transposon TNT 1-94 OS=Nicotiana tabacum PE=2 SV=1	100	0	A5BPL2	A5BPL2_VITVI Putative uncharacterized protein OS=Vitis vinifera GN=VITISV_006230 PE=4 SV=1	-
343	gi|462422246|gb|EMJ26509.1|	hypothetical protein PRUPE_ppa001192mg [Prunus persica]	119033	MAAENSSGTRRNSNTQLLEELEALSESLYQSHTSSTSTRRTASLILPRSSVPAIPSKDEIVPASAEEIRLKNKPRRRMSLSPWRSRPKLINDDDENEQKDRGKKATNNNLPGLRSLDDKATATTEKKGIWNWKPIRAISHIGMNKVSCLFSVEVVAAQGLPASMNGLRLSVCVRKKETKDGAVQTMPSRVTQGAADFEETLFLRCHVYCSNGHGKQQKFEPRPFWIYVFAVDAEELDFGRSSVDLSQLIRESIERNNEGQRIRQWDTSFKLLGKAKGGELVLKLGFQIMEKDGGIGIYSQTDDLKSVKSKNFSSSFARKQSKTSFSVSSPKLSSRGEAWTPSQAGKAADLQGIDELDLDEPNPVPISSSSSSSAVKPKEPEVPKTEDLDVPDFEVVDKG…	128|142	3.3|5.3	-|-	3|5	3|4	2|3	2|2	0.824	---	3	1	-	-	0.821	---	2	-	-	-	1.569	---	3	1	-	-	0.842	---	2	-	*	-	gi|462422246|gb|EMJ26509.1|	100	0	gi|462422246|gb|EMJ26509.1|	hypothetical protein PRUPE_ppa001192mg [Prunus persica]	-	-	-	-	72.24	0	B9H5V4	B9H5V4_POPTR Predicted protein (Fragment) OS=Populus trichocarpa GN=POPTRDRAFT_206815 PE=4 SV=1	-
344	gi|449453214|ref|XP_004144353.1|	PREDICTED: protein DYAD-like [Cucumis sativus]	62288	MTEEDKLNDEANSLIAEVPIIPGFKKRKRLSLSRLKEVKASLHAKQGQSTCVSNSSRSCKLKNESTINRWTPERYRLAELSMLEVMKAEGATFANPVPRPVLRMAARKHIGDTGLLDHLLKHIDGKVAPGGAERFRRWFNANGIMEYWLENADLVNIRQEAGVQDPYWVPQSRPLHARANFQDSQSSEEMRLLRAEMTKMKRDMQELASKFRDQERLNSMEVNDMIHEELIKREAVAEKHRNEITGCLKGLQGILSGELMTWKTKVELQLMEITSSLGCIQPSKQLLTSPASKKWEDWLERTNLDNFQDDEIASWFEGDDTFSVQAQQDVIFQNSYRPSASFELYGNNLVQDIGREGEQEHLNKWSKTKRDDMEKQEDYGANITPDSSATGNSTSEFNT…	22|-	2.4|-	1|-	1|-	1|-	1|-	1|-	---	-	-	-	-	-	---	-	-	-	-	-	---	-	-	-	-	-	---	-	-	-	-	-	gi|449453214|ref|XP_004144353.1|	100	0	gi|449453214|ref|XP_004144353.1|	PREDICTED: protein DYAD-like [Cucumis sativus]	45.02	5e-41	sp|Q9FGN8|DYAD_ARATH	Protein DYAD OS=Arabidopsis thaliana GN=DYAD PE=1 SV=2	65.52	2e-14	A5BYM7	A5BYM7_VITVI Putative uncharacterized protein OS=Vitis vinifera GN=VITISV_026354 PE=4 SV=1	-
345	gi|357000641|gb|AET48503.1|	photosystem II protein D2 (chloroplast) [Pinus glabra]	41796	MTIALGKKSSKEEKTLFDTVDDWLRRDRFVFVGWSGLLLFPCAYFALGGWFTGTTFVTSWYTHGLASSYLEGCNFLTAAVSTPANSLAHSLLLLWGPEAQGDLTRWCQLGGLWTFVALHGAFGLIGFMLRQFELARSVQLRPYNAIAFSGPIAVFVSVFLIYPLGQSGWFFAPSFGVAAIFRFILFFQGFHNWTLNPFHMMGVAGVLGAALLCAIHGATVENTLFEDGDGANTFRAFNPTQSEETYSMVTANRFWPQIFGVAFSNKCWLHFFMLFVPVTGLWMSAIGVVGLALNLRAYDFVSQEIRAAEDPESETFYTKNILLNEGIRAWMAAQDQPHENLIFPEEVLPXGNAL	-|105	-|10.2	-|-	-|7	-|1	-|2	-|1	-	---	-	-	-	-	-	---	-	-	-	-	-	---	-	-	-	-	-	---	-	-	-	-	gi|357000641|gb|AET48503.1|	100	0	gi|357000641|gb|AET48503.1|	photosystem II protein D2 (chloroplast) [Pinus glabra]	98.31	0	sp|P41644|PSBD_PINTH	Photosystem II D2 protein OS=Pinus thunbergii GN=psbD PE=3 SV=1	100	0	G8J232	G8J232_9CONI Photosystem II D2 protein OS=Pinus glabra GN=psbD PE=3 SV=1	-
346	gi|21579|emb|CAA36612.1|	unnamed protein product [Solanum tuberosum]	132011	MATANGAHLFNHYSSNSRFIHFTSRNTSSKLFLTKTSHFRRPKRCFHVNNTLSEKIHHPITEQGGESDLSSFAPDAASITSSIKYHAEFTPVFSPERFELPKAFFATAQSVRDSLLINWNATYDIYEKLNMKQAYYLSMEFLQGRALLNAIGNLELTGDFAEALKNLGHNLENVASQEPDAALGNGGLGRLASCFLDSLATLNYPAWGYGLRYKYGLFKQRITKDGQEEVAEDWLEIGSPWEVVRNDVSYPIKFYGKVSTGSDGKRYWIGGEDIKAVAYDVPIPGYKTRTTISLRLWSTQVPSADFDLSAFNAGEHTKACEAQANAEKICYILYPGDESEEGKILRLKQQYTLCSASLQDIISRFERRSGDRIKWEEFPEKVAVQMNDTHPTLCIPELM…	-|25	-|1.1	-|7	-|1	-|1	-|1	-|1	-	---	-	-	-	-	-	---	-	-	-	-	-	---	-	-	-	-	-	---	-	-	-	-	gi|21579|emb|CAA36612.1|	100	7e-07	gi|553095|gb|AAA33813.1|	alpha-glucan phosphorylase type L [Solanum tuberosum]	99.9	0	sp|P04045|PHSL1_SOLTU	Alpha-1,4 glucan phosphorylase L-1 isozyme, chloroplastic/amyloplastic OS=Solanum tuberosum PE=1 SV=2	90.22	5e-148	C6TI30	C6TI30_SOYBN Phosphorylase OS=Glycine max PE=2 SV=1	STM3514
347	gi|357442289|ref|XP_003591422.1|	hypothetical protein MTR_1g087270 [Medicago truncatula] >gi|355480470|gb|AES61673.1| hypothetical protein MTR_1g087270 [Medicago truncatula]	79129	MAVTTSFLNSTEKKQHWWLTNRKIVEKYIKDARTLIATQERNEIVSAISLLDSALAISPSSDQALEMKARSLLYLRRFKDVANMLQDYIPSLKMANDDSGSVSSSSDGSSQQLSREGVKLLSSSDSSAPDQSYFKCFSVSDLKKRVMAGLCKSYDNEGYWRYLVLGKACCHLGLMEDAMVLLQTGKRLASAAFRRESVCWSDDSFSLWSSPFSGDGALSKQSTTTPPKSPLSESETVNQLLAHIKFLLRRRAAAIAAMDAGLHSEAIRHFSKIVDGRRGAPQGFLAECYMHRASAFRSAGRIADSIADCNRTLSLDPTCIQALEARASILETIRCYQDCLHDLEHLKLLYNTILRDRKLAGPLWKRHNVRYNEIPGKLCTLTAKIQQLKQKLSCGETRN…	36|-	1.7|-	-|-	1|-	1|-	1|-	1|-	---	-	-	-	-	-	---	-	-	-	-	-	---	-	-	-	-	-	---	-	-	-	-	-	gi|357442289|ref|XP_003591422.1|	100	0	gi|357442289|ref|XP_003591422.1|	hypothetical protein MTR_1g087270 [Medicago truncatula] >gi|355480470|gb|AES61673.1| hypothetical protein MTR_1g087270 [Medicago truncatula]	-	-	-	-	100	0	G7IDS2	G7IDS2_MEDTR Putative uncharacterized protein OS=Medicago truncatula GN=MTR_1g087270 PE=4 SV=1	-
348	gi|3193304|gb|AAC19288.1|	T14P8.21 [Arabidopsis thaliana] >gi|7269003|emb|CAB80736.1| AT4g02430 [Arabidopsis thaliana]	35563	MSSRSSRTIYVGNLPGDIREREVEDLFSKYGPVVQIDLKIPPRPPGYAFVEFEDARDADDAIYGRDGYDFDGHHLRVELAHGGRRSSHDARGSYSGRGRGGRGGGDGGGRERGPSRRSEYRVVVSGLPSSASWQDLKDHMRKGGEVCFSQVFRDGRGTTGIVDYTSYEDMKYAVRYKKSSMTQSFGMRFLMNMFGLENMIQGGIRGAPAVEDPILRAAAVDGVPAVVVAAAEAGARAEVQRLNLCVDRLQNLHRDLLALAPALSRGHCLHEGMLHFFYNVYAKISNIKHNIGSI	30|33	4.1|4.1	55|55	1|1	1|1	1|1	1|1	---	---	-	-	-	-	---	---	-	-	-	-	---	---	-	-	-	-	---	---	-	-	-	-	gi|3193304|gb|AAC19288.1|	100	2e-132	gi|3193304|gb|AAC19288.1|	T14P8.21 [Arabidopsis thaliana] >gi|7269003|emb|CAB80736.1| AT4g02430 [Arabidopsis thaliana]	81.14	2e-68	sp|O22315|SRSF1_ARATH	Pre-mRNA-splicing factor SF2 OS=Arabidopsis thaliana GN=SF2 PE=1 SV=1	100	2e-131	O81290	O81290_ARATH AT4g02430 protein OS=Arabidopsis thaliana GN=T14P8.21 PE=2 SV=1	SPAC16.02c
349	gi|225455802|ref|XP_002271556.1|	PREDICTED: G patch domain-containing protein 1-like [Vitis vinifera]	139575	MDADEEDYVFYGTPIEREEEMTSRKKKAVAESSGLLRSLPPWKQEVTDEEGRRRFHGAFTGGFSAGFYNTVGSKEGWAPQSFTSSRKNRAEVKKQSIFSFLDDDEIAEMEGHSLGTSLQFDTFGFTAAELARKQAEKEQQQRPSAIPGPLPDEIVLLATESIGVKLLLKMGWRRGNSIKDSHTNSLYDARREARKAFLALSSDDVSTDLAVSEGVKSDLQNAIELPANDDLKSSESTPVYVLNPKQDLHGLGYDPFKHAPEFREKKRLRMSGKKELGLKNDLFAFKSRKVAPGFGIGALEELDVEDEDVYASGYDFEDNYIQEVEEPSGLVIESKQKLGSKEKGVLSGFKVASKLDYQLERFDPPVVPKNFVPHHKFHAPLDDSNKHDGDPPPPEAIAP…	-|24	-|1.2	-|1	-|1	-|1	-|1	-|1	-	---	-	-	-	-	-	---	-	-	-	-	-	---	-	-	-	-	-	---	-	-	-	-	gi|225455802|ref|XP_002271556.1|	100	0	gi|225455802|ref|XP_002271556.1|	PREDICTED: G patch domain-containing protein 1-like [Vitis vinifera]	33.08	5e-29	sp|Q9BRR8|GPTC1_HUMAN	G patch domain-containing protein 1 OS=Homo sapiens GN=GPATCH1 PE=1 SV=1	100	0	F6GTG8	F6GTG8_VITVI Putative uncharacterized protein OS=Vitis vinifera GN=VIT_17s0000g04440 PE=4 SV=1	-
350	gi|224133740|ref|XP_002321649.1|	predicted protein [Populus trichocarpa] >gi|222868645|gb|EEF05776.1| predicted protein [Populus trichocarpa]	36029	MAETCICSFPSIFTSKPPLKPLPISHRPIKLQLSYSHSLSTLSVKPKTHLSLTIPFVAQTSDWAQQEEENNTTITLTEVSDWEAEGEDAAASETEAVRGEGERGDEEGFVEPPEEAKIYVGNLPYDVTSEKLAMLFDQAGTVEISEVIYNTETDTSRGFGFVTMSTVEESDKAIEMFNRYNLDGRLLTVNKAAPRGSRPERPPRVSEPSYRIYVGNLPWGVDSGRLEEVFSEHGKVVSAQVVSDWETGRSRGFGFVTMSSESELNDAIAALDGQELDGRAIRVNVAAERPRRSSF	33|-	9.5|-	-|-	2|-	2|-	1|-	1|-	---	-	-	-	-	-	---	-	-	-	-	-	---	-	-	-	-	-	---	-	-	-	-	-	gi|224133740|ref|XP_002321649.1|	100	1e-142	gi|224133740|ref|XP_002321649.1|	predicted protein [Populus trichocarpa] >gi|222868645|gb|EEF05776.1| predicted protein [Populus trichocarpa]	75.56	4e-68	sp|P19683|ROC4_NICSY	31 kDa ribonucleoprotein, chloroplastic OS=Nicotiana sylvestris PE=1 SV=1	100	1e-141	B9IF14	B9IF14_POPTR Predicted protein OS=Populus trichocarpa GN=POPTRDRAFT_835181 PE=4 SV=1	SPAC140.02
351	gi|84453208|dbj|BAE71201.1|	putative cytosolic factor [Trifolium pratense]	87600	MAEEPQKPTEQVATTPATSETTIEKTPPPQAEEVVAAADADAVVVPPVVAEETEKPAEDVKPADETAAATDKKILQSVSFKEETNVVSELPESQKKALDELKQLIQEALNKHEFTAPPPPPPTKAVAEVAEEKKPEEEEKKTEEVVAEEKKVEEVVAEEKKVEEAVAEEKKVEEVEKKEEEKGSSSEEPKTEAKIEAEPEAKKEETVLEVVEKIATSTEEDGAKTVEAIQESIVSVTVTDGEQPVTETVGEAVAVAEVEVTPTTPEEVEIWGIPLLADERSDVILLKFLRARDFKVKEAYTMIKQTVIWRKEFGIEALLQEDLGTDWDKVVFTDGYDKEGHPVYYNVFGEFENKELYQNTFSDDEKRTKFIRWRIQSLEKSIRKLDFTPSGISTIVQVN…	-|35	-|1.5	-|6	-|1	-|1	-|1	-|1	-	---	-	-	-	-	-	---	-	-	-	-	-	---	-	-	-	-	-	---	-	-	-	-	gi|84453208|dbj|BAE71201.1|	100	0	gi|84453208|dbj|BAE71201.1|	putative cytosolic factor [Trifolium pratense]	65	7e-134	sp|Q9M0R2|PATL5_ARATH	Patellin-5 OS=Arabidopsis thaliana GN=PATL5 PE=1 SV=2	100	0	Q2PF01	Q2PF01_TRIPR Putative cytosolic factor OS=Trifolium pratense PE=2 SV=1	-
352	gi|14423875|sp|Q9XF42.1|PROF3_MALDO	RecName: Full=Profilin-3; AltName: Full=GD4-5; AltName: Full=Pollen allergen Mal d 4.0101; AltName: Allergen=Mal d 4.0101 >gi|4761588|gb|AAD29414.1|AF129428_1 profilin [Malus x domestica] >gi|60418868|gb|AAX19861.1| profilin 3 [Malus x domestica] >g	16496	MSWQAYVDDHLMCDIDGNRLTAAAILGQDGSVWSQSASFPAFKPEEIAAILKDFDQPGTLAPTGLFLGGTKYMVIQGEPGAVIRGKKGSGGITIKKTSQALLIGIYDEPVTPGQCNIVVERLGDYLIEQGL	647|371	17.6|17.6	14|14	33|26	1|2	2|2	1|1	---	---	-	-	-	-	---	---	-	-	-	-	---	---	-	-	-	-	---	---	-	-	-	-	gi|14423875|sp|Q9XF42.1|PROF3_MALDO	100	7e-62	gi|14423875|sp|Q9XF42.1|PROF3_MALDO	RecName: Full=Profilin-3; AltName: Full=GD4-5; AltName: Full=Pollen allergen Mal d 4.0101; AltName: Allergen=Mal d 4.0101 >gi|4761588|gb|AAD29414.1|AF129428_1 profilin [Malus x domestica] >gi|60418868|gb|AAX19861.1| profilin 3 [Malus x domestica] >gi|60418870|gb|AAX19862.1| profilin 3 [Malus x domestica] >gi|60418872|gb|AAX19863.1| profilin 3 [Malus x domestica] >gi|60418874|gb|AAX19864.1| profil…	100	2e-62	sp|Q9XF42|PROF3_MALDO	Profilin-3 OS=Malus domestica PE=1 SV=1	100	9e-61	Q3BCS2	Q3BCS2_MALDO Profilin OS=Malus domestica GN=Mal d 4.03 PE=3 SV=1	-
353	gi|308193727|gb|ADO16377.1|	photosystem II 47 kDa protein [Begonia ulmifolia]	52598	GWAGSMALYELAVFDPSDPVLDPMWRQGMFVIPFMTRLGITNSWGGWSITGGTITNPGIWSYEGVAGAHIVFSGLCFLAAIWHWVYWDLEIFCDERTGKPSLDLPKIFGIHLFLAGVACFSFGAFHVTGLYGPGIWVSDPYGLTGRVQSVNPAWGVEGFDPFVPGGIASHHIAAGTLGILAGLFHLSVRPPQRLYKGLRMGNIETVLSSSIAAVFFAAFVVAGTMWYGSATTPIELFGPTRYQWDQGYFQQEIYRRVGTGLAENQSLSQAWSKIPEKLAFYDYIGNNPAKGGLFRAGSMDNGDGIAVGWLGHPIFKDKEGRELFVRRMPTFFETFPVVLVDGDGIVRADVPFRRAESKYSVEQVGVTVEFYGGELNGISYSEPATVKKYARRAQLGEIF…	-|1807	-|20.0	-|-	-|67	-|1	-|8	-|1	-	---	-	1	-	-	-	---	-	1	-	-	-	---	-	1	-	-	-	---	-	1	-	-	gi|308193727|gb|ADO16377.1|	100	0	gi|308193727|gb|ADO16377.1|	photosystem II 47 kDa protein [Begonia ulmifolia]	98.18	0	sp|Q09G20|PSBB_PLAOC	Photosystem II CP47 chlorophyll apoprotein OS=Platanus occidentalis GN=psbB PE=3 SV=1	100	0	E2E317	E2E317_9ROSI Photosystem II CP47 chlorophyll apoprotein (Fragment) OS=Begonia ulmifolia GN=psbB PE=3 SV=1	-
354	gi|460406579|ref|XP_004248740.1|	PREDICTED: uncharacterized protein LOC101248248 [Solanum lycopersicum]	84846	MATAEKNRAPYGSWKSPITADIVSGSDKRLEGFTVDSHGHLIWLETRPAESGRAVLVKQSGEDITPKNFNVRNTVHEYGGGSFGVSGDVLVFSNFDDQRLYKQILTSSDLGPVPITPDYVGPHVRYADGVFDSRLNRYIAVREDHRGVDAKPTNEIVSVTLNDNTTEEPKVLISGNEFYAFPRVDVKGERLAWIEWSHPNMHWDKSELWVGYISESGDIEKRVVVAGGCPTLVESPTEPLWSSKGELFFITDRNTGFWNIYKWVEDQNEVLAIYSLNAEFTRPFWVFGNRCYDIIERKEESTIIACSYRQHGKSYLGVINQAKNSFCSVDIPFTYISNIVASGQILYIEGASSVLPTSLAKVILDDHMSNVVDFSIMWSSSSDIDKYIPYFSHPEFIEF…	-|20	-|2.0	-|-	-|1	-|1	-|1	-|1	-	---	-	-	-	-	-	---	-	-	-	-	-	---	-	-	-	-	-	---	-	-	-	-	gi|460406579|ref|XP_004248740.1|	100	0	gi|460406579|ref|XP_004248740.1|	PREDICTED: uncharacterized protein LOC101248248 [Solanum lycopersicum]	31.53	6e-22	sp|P34422|DPF6_CAEEL	Dipeptidyl peptidase family member 6 OS=Caenorhabditis elegans GN=dpf-6 PE=3 SV=2	75.28	3e-119	G8FGH7	G8FGH7_ELAGV C-terminal domain-containing protein (Fragment) OS=Elaeis guineensis var. tenera GN=TolB PE=2 SV=1	slr0825
355	gi|297848060|ref|XP_002891911.1|	thylakoid lumen 18.3 kDa protein [Arabidopsis lyrata subsp. lyrata] >gi|297337753|gb|EFH68170.1| thylakoid lumen 18.3 kDa protein [Arabidopsis lyrata subsp. lyrata]	38953	METLLSPRALSPPLNSKPTSTHQTKPTSHSLSLSKPTTFSGPKHLSTRFTKPESRNWLTDAKQGLAALALSLTLSFSPIGTALASEFNILNDGPPKDTYVVDDAGVLSRVTKSDLKKLLSDLEYRKKLRLNFITVRKLTSKADAFEYADQVLEKWYPSIEEGNNKGIVVLITSQKEGAITGGPAFIEAVGENILDATVSENLPVLATDEKYNEAVYSSAKRLVAAIDGLPDPGGPTVKDSKRESNFKTKQETDEKRGQFSLVVGGLLVIAFVVPMAQYFAYVSRK	184|122	8.1|8.1	-|-	8|5	8|5	2|2	2|2	0.954	0.697	7	3	-	-	0.947	1.215	4	3	-	-	1.018	0.906	6	3	-	-	0.852	0.757	4	3	-	-	gi|297848060|ref|XP_002891911.1|	100	2e-147	gi|297848060|ref|XP_002891911.1|	thylakoid lumen 18.3 kDa protein [Arabidopsis lyrata subsp. lyrata] >gi|297337753|gb|EFH68170.1| thylakoid lumen 18.3 kDa protein [Arabidopsis lyrata subsp. lyrata]	96.84	3e-143	sp|Q9ZVL6|U603_ARATH	UPF0603 protein At1g54780, chloroplastic OS=Arabidopsis thaliana GN=At1g54780 PE=1 SV=1	100	2e-146	D7KPZ1	D7KPZ1_ARALL Thylakoid lumen 18.3 kDa protein OS=Arabidopsis lyrata subsp. lyrata GN=ARALYDRAFT_892722 PE=4 SV=1	alr4100
356	gi|225429850|ref|XP_002283195.1|	PREDICTED: proteasome subunit beta type-6 [Vitis vinifera]	27694	MDLNAPHTMGTTIIGVTYNGGVVLGADSRTSTGMYVANRASDKITQLTDNVYICRSGSAADSQIVSDYVRYFLHQHTIQLGQPATVKVAANLVRLVSYNNKNMLETGLIVGGWDKYEGGKIYAIPLGGTIIEQPFAIGGSGSTYLYGFFDQAWKEGMTKDEAEQLVVKAVSLAIARDGASGGVIRTVIINSEGVTRNFYPGDSLPLWHEELPPQNSLLELLHSSSPEPMNV	106|-	12.6|-	2|-	4|-	4|-	2|-	2|-	1.131	-	3	-	-	-	1.182	-	2	-	-	-	0.777	-	3	-	-	-	1.022	-	2	-	-	-	gi|225429850|ref|XP_002283195.1|	100	4e-118	gi|296081796|emb|CBI20801.3|	unnamed protein product [Vitis vinifera]	88.84	6e-114	sp|Q8LD27|PSB6_ARATH	Proteasome subunit beta type-6 OS=Arabidopsis thaliana GN=PBA1 PE=1 SV=2	100	4e-117	D7SU52	D7SU52_VITVI Proteasome subunit beta type OS=Vitis vinifera GN=VIT_04s0008g02850 PE=3 SV=1	PAE0807
357	gi|449441238|ref|XP_004138389.1|	PREDICTED: elongation factor 1-delta-like [Cucumis sativus] >gi|449526197|ref|XP_004170100.1| PREDICTED: elongation factor 1-delta-like [Cucumis sativus]	31157	MAVAFPDVKSASGLKKLDEYLLSRSYISGYQPSKDDVTVYEALSKPVSSEYVNVSRWSNHIEALLRVSAVFGEGSGVKLDAVATPPAADAKAADDDDDDDDMDLFGEETEEEKKAAEERAAAVKASAKKKESGKSSVLMDIKPWDDETDMKKLEEAVRSVQMEGLLWGASKLVPVGYGIKKLQIMLTIVDDLVSVDNLIEEYLTVEPINEHVQSCDIVAFNKI	148|93	21.5|17.5	-|1	10|9	4|3	4|3	1|1	---	---	-	-	-	-	---	---	-	-	-	-	---	---	-	-	-	-	---	---	-	-	-	-	gi|449441238|ref|XP_004138389.1|	100	2e-86	gi|449441238|ref|XP_004138389.1|	PREDICTED: elongation factor 1-delta-like [Cucumis sativus] >gi|449526197|ref|XP_004170100.1| PREDICTED: elongation factor 1-delta-like [Cucumis sativus]	85.06	1e-35	sp|P29546|EF1B_WHEAT	Elongation factor 1-beta OS=Triticum aestivum PE=1 SV=2	89.66	8e-39	B9I3Q0	B9I3Q0_POPTR Predicted protein OS=Populus trichocarpa GN=POPTRDRAFT_891696 PE=3 SV=1	SPCC1450.04
358	gi|3036948|dbj|BAA25392.1|	light harvesting chlorophyll a/b-binding protein [Nicotiana sylvestris]	33303	MAASTMALSSSSFAGKAVKLSPSSSEITGNGKVTMRKTASKAKPVSSGSPWYGPDRVKYLGPFSGESPSYLTGEFPGDYGWDTAGLSADPETFAKNRELEVIHCRWAMLGALGCVFPELLARNGVKFGEAVWFKAGSQIFSEGGLDYLGNPSLVHAQSILAIWACQVVLMGAVEGYRVAGGPLGEVVDPLYPGGSFDPLGLAEDPEAFAELKVKEIKNGRLAMFSMFGFFVQAIVTGKGPLENLADHLADPVNNNAWAYATNFVPGK	119|-	19.5|-	2|-	8|-	2|-	3|-	1|-	14.271	-	2	-	*	-	4.502	-	2	-	-	-	0.157	-	2	-	-	-	9.064	-	2	-	*	-	gi|3036948|dbj|BAA25392.1|	100	6e-146	gi|3036948|dbj|BAA25392.1|	light harvesting chlorophyll a/b-binding protein [Nicotiana sylvestris]	99.6	2e-145	sp|P27495|CB24_TOBAC	Chlorophyll a-b binding protein 40, chloroplastic OS=Nicotiana tabacum GN=CAB40 PE=2 SV=1	100	6e-145	O64446	O64446_NICSY Light harvesting chlorophyll a/b-binding protein (Precursor) OS=Nicotiana sylvestris GN=Lhcb1*6 PE=4 SV=1	-
359	gi|14594933|emb|CAC43327.1|	putative beta6 proteasome subunit [Nicotiana tabacum]	24843	SPYDNNGGTCVAVAGADYCVIAADTRMSSGYNILTRDYSKIIKLADKCVLASSGFQADVKALQKVLAARHLIYQHQHNKQMSCPAMGQLLSNTLYYKRFFPYYSFNVLGGLDNEGKGCVFTYDAVGSYGRVGYSSQGSGSTLIMPFLDYQLKSPSPLLLPAKDAVTPLSESEAIDLVKTCFVSATERDIYTG	57|77	8.3|8.3	10|10	1|2	1|2	1|1	1|1	---	0.743	1	2	-	-	---	1.059	1	2	-	-	---	1.531	1	2	-	-	---	1.145	1	2	-	-	gi|14594933|emb|CAC43327.1|	100	1e-103	gi|14594933|emb|CAC43327.1|	putative beta6 proteasome subunit [Nicotiana tabacum]	94.79	3e-100	sp|O82531|PSB1_PETHY	Proteasome subunit beta type-1 OS=Petunia hybrida GN=PBF1 PE=2 SV=1	100	9e-103	Q93X30	Q93X30_TOBAC Proteasome subunit beta type (Fragment) OS=Nicotiana tabacum GN=b6 PE=2 SV=1	YBL041w
360	gi|356572914|ref|XP_003554610.1|	PREDICTED: uncharacterized protein At1g09340, chloroplastic-like [Glycine max]	51507	MARVVALQQNQLSFSPLASSLFDFSGTRLQTQLQFKRKLCHPKGSFYVSASSTKKILIMGGTRFIGVFLSRLLVKEGHQVTLFTRGKAPVTQQLPGESDNDYADFSSKILHLKGDRKDFDFVKSSLSAEGFDVVYDINGREADEVEPILDALPNLEQFIYCSSAGVYLKSDLLPHAETDAVDPKSRHKGKLETESLLQARGVNWTSIRPVYIYGPLNYNPVEEWFFHRLKAGRPIPIPSSGLQITQLGHVKDLATAFIQVLGNEKASKEVFNISGEKYVTFDGLARACAKAGGFPEPEIIHYNPKDFDFGKKKSFPFRDQHFFASIEKAKRVLGWEPEFGLVEGLADSYNLDFGRGTYRKEADFSTDDIILGKSLVSV	239|346	12.2|12.2	-|-	19|15	3|7	5|5	1|1	---	2.106	1	3	-	*	---	2.087	1	3	-	-	---	0.597	1	3	-	-	---	3.391	1	3	-	*	gi|356572914|ref|XP_003554610.1|	100	0	gi|356572914|ref|XP_003554610.1|	PREDICTED: uncharacterized protein At1g09340, chloroplastic-like [Glycine max]	83.51	0	sp|Q9SA52|CP41B_ARATH	Chloroplast stem-loop binding protein of 41 kDa b, chloroplastic OS=Arabidopsis thaliana GN=CSP41B PE=1 SV=1	100	0	I1NBQ5	I1NBQ5_SOYBN Uncharacterized protein OS=Glycine max GN=Gma.56772 PE=4 SV=1	FN1299
361	gi|829119|emb|CAA52414.1|	cyclophilin [Phaseolus vulgaris]	22331	MPNPKVFFDMTIGGQPAGRIVFELYADVTPRTAENFRALCTGEKGVGRSGKPVHFKGSIFHRVIPNFMCQGGDFTAGNGTGGESIYGAKFADENFVKKHTGPGILSMANAGPGTNGSQFFICTTKTEWLDGKHVVFGQVVEGLDVVKDIEKVGSGSGKTARPVAIADCGQLS	111|115	13.4|13.4	2|2	4|4	2|3	2|2	1|1	0.323	0.309	2	2	-	-	---	---	1	1	-	-	1.21	1.324	2	2	-	-	---	---	1	1	-	-	gi|829119|emb|CAA52414.1|	100	2e-88	gi|829119|emb|CAA52414.1|	cyclophilin [Phaseolus vulgaris]	91.28	2e-81	sp|Q8W171|CYP1_SOYBN	Peptidyl-prolyl cis-trans isomerase 1 OS=Glycine max GN=Cyp1 PE=2 SV=1	100	2e-87	Q41119	Q41119_PHAVU Peptidyl-prolyl cis-trans isomerase OS=Phaseolus vulgaris GN=Cyp PE=3 SV=1	slr1251
362	gi|218196201|gb|EEC78628.1|	hypothetical protein OsI_18681 [Oryza sativa Indica Group]	20461	MNARVLGGGGGGGDGETTVVLAHGYGGSSHIWDDVAPALAKTFRVVVFDWSFSGDVVVDDDDDAAAVSEDISCSYFGFADELVAMMDELALTAVVFVGHSMAGMIGCIASVARPELFRHLVLVGASPRYINDDGDGYVGGFERGEVDAMLAAIEADFAAWAPLVSPEGPYLTAPMEFVRVMEAILLDH	-|29	-|4.8	-|2	-|1	-|1	-|1	-|1	-	---	-	-	-	-	-	---	-	-	-	-	-	---	-	-	-	-	-	---	-	-	-	-	gi|218196201|gb|EEC78628.1|	100	1e-80	gi|218196201|gb|EEC78628.1|	hypothetical protein OsI_18681 [Oryza sativa Indica Group]	34.73	4e-15	sp|O07015|RSBQ_BACSU	Sigma factor SigB regulation protein RsbQ OS=Bacillus subtilis (strain 168) GN=rsbQ PE=1 SV=1	100	1e-79	B8AYN7	B8AYN7_ORYSI Putative uncharacterized protein OS=Oryza sativa subsp. indica GN=OsI_18681 PE=4 SV=1	slr0440
363	gi|194716776|gb|ACF93237.1|	monodehydroascorbate reductase [Picrorhiza kurrooa]	63385	MSSISNALSFKHGLSLWCPHSTSVNQISQPCSVSSKIFRRRFSVLASSFANENREFVIVGGGNASGYAARTFVEHGMADGKLCIVSKEAYVPYERPALTKAYLFPLDKKPARLPGFHTCVGAGGERQTPDWYKEKGIEMLHEDPVADIDTEKQTLTTNSGKLLKYGSLIIATGCTASRFPDKIGGNLPGVHYVRDVADANSLISSLEKSKKVVVVGGGYIGMEVAAATVAWKLDTTIIFPEDHLMTRLFTPSLAQKYEDLYKDYGVNFVKGASIKSLEAGSDGRVSGVKLENGSIIEADTVVIGIGGKPAVGPFESVGLNKTVGGIQVDGLFRTSIPGIFAIGDVAAFPLKIYDRITRVEHVDHARRSAQHCVKSLLTAHTDTYDYLPLFYSRVFEHEG…	-|311	-|11.9	-|-	-|10	-|4	-|4	-|2	-	1.709	-	4	-	-	-	0.935	-	4	-	-	-	1.146	-	4	-	-	-	1.688	-	4	-	-	gi|194716776|gb|ACF93237.1|	100	0	gi|194716776|gb|ACF93237.1|	monodehydroascorbate reductase [Picrorhiza kurrooa]	80.08	0	sp|P92947|MDARP_ARATH	Monodehydroascorbate reductase, chloroplastic OS=Arabidopsis thaliana GN=At1g63940 PE=2 SV=3	100	0	B5AR71	B5AR71_9LAMI Monodehydroascorbate reductase OS=Picrorhiza kurrooa GN=mdhar PE=2 SV=1	CC3525
364	gi|224091124|ref|XP_002309187.1|	aminophospholipid ATPase [Populus trichocarpa] >gi|222855163|gb|EEE92710.1| aminophospholipid ATPase [Populus trichocarpa]	166306	MTSGWPLLLSLDNSPVSEQPLPHHSGSFSALGVSRRDCSFNTSILHLAQGEPFEVDCSEKDEGRAHFFGDTRFRSVNPVGESFDLVVNTKRLYSLKSEFFEEVPLECPKQRSKHLVWWGATASEMLHNNNNTTFSTGFEISRDCGNLGKPKGRSRRRSVQFDDVLREEDARFIYINDPRRTNDQYEFTGNEIRTSKYTLITFLPKNIFIQFHRVAYLYFLAIAALNQLPPLAVFGRTVSLFPLLFVLCVTAIKDGYEDWRRHRSDRNENNREALVLQCGQFRSKKWKKIRAGEVVKICTDETIPCDMVLLGTSDPSGVAYIQTMNLDGESNLKTRYARQETSLAVLEGGAISGLIRCEQPNRNIYEFTANMEFNGQKFSLSQSNIVLRGCQLKNTGWII…	-|36	-|0.6	-|2	-|2	-|2	-|1	-|1	-	---	-	-	-	-	-	---	-	-	-	-	-	---	-	-	-	-	-	---	-	-	-	-	gi|224091124|ref|XP_002309187.1|	100	0	gi|224091124|ref|XP_002309187.1|	aminophospholipid ATPase [Populus trichocarpa] >gi|222855163|gb|EEE92710.1| aminophospholipid ATPase [Populus trichocarpa]	58.37	0	sp|P98204|ALA1_ARATH	Phospholipid-transporting ATPase 1 OS=Arabidopsis thaliana GN=ALA1 PE=1 SV=1	100	0	B9HDJ5	B9HDJ5_POPTR Aminophospholipid ATPase OS=Populus trichocarpa GN=POPTRDRAFT_560995 PE=4 SV=1	YAL026c
365	gi|302764432|ref|XP_002965637.1|	hypothetical protein SELMODRAFT_85054 [Selaginella moellendorffii] >gi|302815188|ref|XP_002989276.1| hypothetical protein SELMODRAFT_129559 [Selaginella moellendorffii] >gi|300143019|gb|EFJ09714.1| hypothetical protein SELMODRAFT_129559 [Selaginella	59523	MAGGGGSDPSTNTRSLEYTPTWAVAAVCFMFVIVSLIGERSLHHLGIWLSRTKRKPLRTALEKMKEELMLLGFISLIITVTASYISKICIRSSFYDKQRMPCKLPHKGDATYDRMMGTSLLEIPRRELASTAHSCPKEHEPFVSFLGLEQLHRFIFVMAVTHVIYSCLTMLLAIMKVYSWRPWEQEAFAHADNQENLAALTRNLTLKRQSTFVACQTSTPGASNRLLLYFICFFRQFGLSVTKPDYLALRMGFLTAHDTSILQKHNLGPKYDFHLYMIRSMEDEFKDIIGISPLLWIFVVLFMLFNVEGTNLYFWISFLPIVMVLVVGTKLQHIIATLALDNSGLSGPLNGFNLRPRDELFWFKRPRLLLRVIHFILFQVGFELATFFWIWWQFGWHSC…	-|21	-|3.7	-|-	-|2	-|2	-|1	-|1	-	---	-	-	-	-	-	---	-	-	-	-	-	---	-	-	-	-	-	---	-	-	-	-	gi|302764432|ref|XP_002965637.1|	100	0	gi|302764432|ref|XP_002965637.1|	hypothetical protein SELMODRAFT_85054 [Selaginella moellendorffii] >gi|302815188|ref|XP_002989276.1| hypothetical protein SELMODRAFT_129559 [Selaginella moellendorffii] >gi|300143019|gb|EFJ09714.1| hypothetical protein SELMODRAFT_129559 [Selaginella moellendorffii] >gi|300166451|gb|EFJ33057.1| hypothetical protein SELMODRAFT_85054 [Selaginella moellendorffii]	54.31	3e-131	sp|Q9FI00|MLO11_ARATH	MLO-like protein 11 OS=Arabidopsis thaliana GN=MLO11 PE=2 SV=1	100	0	D8R459	D8R459_SELML Putative uncharacterized protein OS=Selaginella moellendorffii GN=SELMODRAFT_129559 PE=4 SV=1	-
366	gi|460406623|ref|XP_004248761.1|	PREDICTED: d-3-phosphoglycerate dehydrogenase, chloroplastic-like [Solanum lycopersicum]	73437	MAASASSAINLSIKPSHTSLSWKTHLSSTSALAVSPLSGHRHYPRFVIYAVGDKPTVLVAEKLGEAGVNLLKEFADVDCSYNLTPEELCNKISLCDALIVRSGTKVSREVFESSGGRLKVVGRAGVGIDNVDLAAATEHGCLVVNAPTANTVAAAEHGISLLTAMARNVAQADASVKAGKWLRNKYVGVSLVGKTLAVMGFGKVGSEVARRAKGLGMHVIAHDPYAPADRARAIGVELVSFDKAIASADFISLHMPLTPATNKVLNDETFAKMKKGVRIVNVARGGVIDEDALVRALDAGIVAQAALDVFTVEPPKDSKLVQHENVTATPHLGASTMEAQEGVAIEIAEAVVGALNGELAATAVNAPMVPAEVLSELKPFVALAEKLGRLAVQLVAGGS…	-|53	-|4.5	-|-	-|2	-|1	-|2	-|1	-	---	-	1	-	-	-	---	-	1	-	-	-	---	-	1	-	-	-	---	-	1	-	-	gi|460406623|ref|XP_004248761.1|	100	0	gi|460406623|ref|XP_004248761.1|	PREDICTED: d-3-phosphoglycerate dehydrogenase, chloroplastic-like [Solanum lycopersicum]	78.08	0	sp|O04130|SERA_ARATH	D-3-phosphoglycerate dehydrogenase, chloroplastic OS=Arabidopsis thaliana GN=At1g17745 PE=1 SV=2	89.76	0	F6I5Y5	F6I5Y5_VITVI Putative uncharacterized protein OS=Vitis vinifera GN=VIT_03s0180g00130 PE=3 SV=1	MJ1018
367	gi|3913240|sp|O24133.1|CHLD_TOBAC	RecName: Full=Magnesium-chelatase subunit ChlD, chloroplastic; Short=Mg-chelatase subunit D; AltName: Full=Mg-protoporphyrin IX chelatase subunit ChlD; Flags: Precursor >gi|2239151|emb|CAA71128.1| CHLD magnesium chelatase subunit [Nicotiana tabacum]	98742	MGFCSTSTLPQTSLSNSQSSTFFTYLKPCPILSSTYLRPKRLKFRLRISATATIDSPNGAVAVVEPEKQPEKISFGRQYFPLAAVIGQDAIKTALLLGAIDREIGGIAICGKRGTAKTLMARGLHAILPPIEVVVGSMANADPNCPDEWEDGLADRAEYGSDGNIKTQIVKSPFVQIPLGVTEDRLIGSVDVEESVKSGTTVFQPGLLAEAHRGVLYVDEINLLDEGISNLLLNVLTEGVNIVEREGISFRHPCKPLLIATYNPEEGAVREHLLDRIAINLSADLPMSFDDRVAAVDIATRFQECSNEVFKMVDEETDSAKTQIILAREYLKDVTISRDQLKYLVMEAIRGGCQGHRAELYAARVAKCLAAIDGREKVGVDELKKAVELVILPRSTIVE…	58|-	4.6|-	1|-	4|-	2|-	3|-	1|-	---	-	-	-	-	-	---	-	-	-	-	-	---	-	-	-	-	-	---	-	-	-	-	-	gi|3913240|sp|O24133.1|CHLD_TOBAC	100	0	gi|3913240|sp|O24133.1|CHLD_TOBAC	RecName: Full=Magnesium-chelatase subunit ChlD, chloroplastic; Short=Mg-chelatase subunit D; AltName: Full=Mg-protoporphyrin IX chelatase subunit ChlD; Flags: Precursor >gi|2239151|emb|CAA71128.1| CHLD magnesium chelatase subunit [Nicotiana tabacum]	100	0	sp|O24133|CHLD_TOBAC	Magnesium-chelatase subunit ChlD, chloroplastic OS=Nicotiana tabacum GN=CHLD PE=2 SV=1	94.44	5e-76	I1LG66	I1LG66_SOYBN Uncharacterized protein OS=Glycine max GN=Gma.29274 PE=4 SV=1	slr1777_1
368	gi|397567724|gb|EJK45744.1|	hypothetical protein THAOC_35626 [Thalassiosira oceanica]	34220	MKHSPVSLLVAILIAATAVASFKSTSHIATARRTRQTITRLSFFGSSSKNLPKPEDRTYPEAKQATYDLQPGEFGFGPEQIVRPLLKQTQLEKRKLQVVYDAKKHGWSAQAFHSRVDAKGASVVLVKVKGRWIGGYNPRGWASLGGSRSSVAAFLFYQKLIGWQKLRVARTGSMACGRDEFDAGIYFGADSLVIPLIGQRPKSVASRLGFYYESGPENKSTMLPRAGEDATASELYVISGVYAKGEEIPNSGGISELGFY	23|-	3.5|-	-|-	1|-	1|-	1|-	1|-	---	-	-	-	-	-	---	-	-	-	-	-	---	-	-	-	-	-	---	-	-	-	-	-	gi|397567724|gb|EJK45744.1|	100	5e-131	gi|397567724|gb|EJK45744.1|	hypothetical protein THAOC_35626 [Thalassiosira oceanica]	-	-	-	-	69.57	5e-83	B8BXH0	B8BXH0_THAPS Predicted protein OS=Thalassiosira pseudonana GN=THAPSDRAFT_3327 PE=4 SV=1	-
369	gi|462405090|gb|EMJ10554.1|	hypothetical protein PRUPE_ppa008655mg [Prunus persica]	42498	MASSASLSSPLHFHNPHPRFSPKPSTTLRPTTTATKPLFAIPPPLTAVADVDSATIAAIGGGSVAALAAALSLADPERRRRLQAEEVGGGDKEVVKDYFNKSGFERWKKIYGETDDVNRVQRDIRLGHSKTVENVMKMLTDEGKLEGVTVCDAGCGTGCLAIPLAKEGAVVTAADISAAMVAEAEKQAREQLQLSNRGFSGGPVMPKFEVKDLESLDGKYDTVVCLDVLIHYPQSKADAMIAHLASLAENRLLISFAPKTLYYDLLKRIGELFPGPSKATRAYLHAEADVERALKKVGWRIRKRGLTTTQFYFSRLVEAVPAK	-|60	-|4.6	-|-	-|1	-|1	-|1	-|1	-	---	-	-	-	-	-	---	-	-	-	-	-	---	-	-	-	-	-	---	-	-	-	-	gi|462405090|gb|EMJ10554.1|	100	2e-155	gi|462405090|gb|EMJ10554.1|	hypothetical protein PRUPE_ppa008655mg [Prunus persica]	55.65	6e-72	sp|Q55467|CHLM_SYNY3	Magnesium-protoporphyrin O-methyltransferase OS=Synechocystis sp. (strain PCC 6803 / Kazusa) GN=chlM PE=3 SV=1	86.49	2e-87	B9I3Z4	B9I3Z4_POPTR Predicted protein OS=Populus trichocarpa GN=POPTRDRAFT_662234 PE=4 SV=1	slr0525
370	gi|15233164|ref|NP_191064.1|	glutathione transferase lambda 2 [Arabidopsis thaliana] >gi|75335852|sp|Q9M2W2.1|GSTL2_ARATH RecName: Full=Glutathione S-transferase L2, chloroplastic; Short=AtGSTL2; AltName: Full=GST class-lambda member 2; Flags: Precursor >gi|124300984|gb|ABN0474	38018	MSVGLKVSAFLHPTLALSSRDVSLSSSSSSLYLDRKILRPGSGRRWCKSRRTEPILAVVESSRVPELDSSSEPVQVFDGSTRLYISYTCPFAQRAWIARNYKGLQNKIELVPIDLKNRPAWYKEKVYSANKVPALEHNNRVLGESLDLIKYIDTNFEGPSLTPDGLEKQVVADELLSYTDSFSKAVRSTLNGTDTNAADVAFDYIEQALSKFNEGPFFLGQFSLVDVAYAPFIERFRLILSDVMNVDITSGRPNLALWIQEMNKIEAYTETRQDPQELVERYKRRVQAEARL	53|-	3.4|-	10|-	1|-	1|-	1|-	1|-	---	-	1	-	-	-	---	-	1	-	-	-	---	-	1	-	-	-	---	-	1	-	-	-	gi|15233164|ref|NP_191064.1|	100	5e-21	gi|26451407|dbj|BAC42803.1|	unknown protein [Arabidopsis thaliana]	100	9e-158	sp|Q9M2W2|GSTL2_ARATH	Glutathione S-transferase L2, chloroplastic OS=Arabidopsis thaliana GN=GSTL2 PE=2 SV=1	90.51	2e-145	D7LV03	D7LV03_ARALL Putative uncharacterized protein OS=Arabidopsis lyrata subsp. lyrata GN=ARALYDRAFT_906920 PE=4 SV=1	sll1902
371	gi|115463855|ref|NP_001055527.1|	Os05g0409300 [Oryza sativa Japonica Group] >gi|75259840|sp|Q6I570.1|CYT3_ORYSJ RecName: Full=Cysteine proteinase inhibitor 3; AltName: Full=Oryzacystatin III; Short=OC-III; AltName: Full=Oryzacystatin-3; Flags: Precursor >gi|113579078|dbj|BAF17441.1	22866	MLRRRGFCCCSGAPAAAAAALLLLAVAAAAPRAAGFHLGGDESVLVRGMLAAIRREQAEAEDAARFAVAEYNKNQGAELEFARIVKAKRQVVTGTLHDLMLEVVDSGKKSLYSAKVWVKPWLDFKAVVEFRHVGDSQSQSATAADDNAGQDTADPTVASRNDLHNTENNKVSVVLSTFSQTYSV	31|-	4.3|-	3|-	1|-	1|-	1|-	1|-	---	-	-	-	-	-	---	-	-	-	-	-	---	-	-	-	-	-	---	-	-	-	-	-	gi|115463855|ref|NP_001055527.1|	100	3e-73	gi|222631572|gb|EEE63704.1|	hypothetical protein OsJ_18522 [Oryza sativa Japonica Group]	100	5e-76	sp|Q6I570|CYT3_ORYSJ	Cysteine proteinase inhibitor 3 OS=Oryza sativa subsp. japonica GN=Os05g0409300 PE=2 SV=1	100	3e-72	B9FIL9	B9FIL9_ORYSJ Putative uncharacterized protein OS=Oryza sativa subsp. japonica GN=OsJ_18522 PE=4 SV=1	-
372	gi|356536703|ref|XP_003536875.1|	PREDICTED: LOW QUALITY PROTEIN: kynurenine--oxoglutarate transaminase 1-like [Glycine max]	50939	MEGKLSRAAKKIPSSSIXELSQLAQRCNAINLAEGFPAPPHLKNAAVSAIISDSSQYRHLQGVCDLLAKIVKQMHGLDIDPLKDVAICCGQSEAFAAAIFATLDPGDEVILFDPSYETYEGCVVMTGGVPVHVPLDPPQWTLDSSKLPRSFTEKTKAIVLNSPHNPTGKVFTKEELEIIAGIXCSRNFLAITDEVYEHITYDNLKHISLASFPGMQERTIITSSLPKSFSVTGWRVGWAIAPAFLASAIRNIDGRVTDYAPAPFQEAALTALRSPPEYFESLRRDYQSKRDYIIKLLGGVGFKIEFIPQDSFFLFAELPDNCPLSDVEFVKKLILEAGVVAVPGQGFFHTNLSSNEVSNLNYQKRYVRFAFCXSDATLTMVAERLGKLLDAARRLALH	23|-	2.8|-	-|-	1|-	1|-	1|-	1|-	---	-	-	-	-	-	---	-	-	-	-	-	---	-	-	-	-	-	---	-	-	-	-	-	gi|356536703|ref|XP_003536875.1|	100	0	gi|356536703|ref|XP_003536875.1|	PREDICTED: LOW QUALITY PROTEIN: kynurenine--oxoglutarate transaminase 1-like [Glycine max]	37.18	3e-59	sp|O53870|DAPC_MYCTU	Probable N-succinyldiaminopimelate aminotransferase DapC OS=Mycobacterium tuberculosis GN=dapC PE=1 SV=1	94.5	9e-106	I1L7S2	I1L7S2_SOYBN Uncharacterized protein (Fragment) OS=Glycine max PE=4 SV=1	Rv0858c
373	gi|470128133|ref|XP_004300006.1|	PREDICTED: ras-related protein RABD1-like [Fragaria vesca subsp. vesca]	27824	MSNEYDYLFKLLLIGDSSVGKSCLLVRFADDSYVDSYVSTIGVDFKIRTVELDGKTVKLQIWDTAGQERFRTITSSYYRGAHGIIIVYDVTEMESFNNVKQWLNEIDRYANESVCKLLVGNKCDLVENKVVDTQTGKALADELGIPFLETSAKDAINVEQAFLTMAGEIKKKMGNQPTANKSSETVQMKGNPIQQSSNCCG	-|125	-|13.9	-|-	-|5	-|3	-|2	-|1	-	0.578	-	2	-	-	-	---	-	-	-	-	-	1.043	-	2	-	-	-	---	-	-	-	-	gi|470128133|ref|XP_004300006.1|	100	1e-115	gi|470128133|ref|XP_004300006.1|	PREDICTED: ras-related protein RABD1-like [Fragaria vesca subsp. vesca]	85.29	2e-99	sp|Q9ZRE2|RABD1_ARATH	Ras-related protein RABD1 OS=Arabidopsis thaliana GN=RABD1 PE=1 SV=1	92.57	1e-106	Q9ZRH6	Q9ZRH6_PETHY Rab1-like small GTP-binding protein OS=Petunia hybrida PE=2 SV=1	SPAC18G6.03
374	gi|19771|emb|CAA35790.1|	acidic chitinase PR-P [Nicotiana tabacum]	29736	MEFSGSPLTLFCCVFFLFLTGSLAQGIGSIVTNDLFNEMLKNRNDGRCPANGFYTYDAFIAAANSFPGFGTSGDDTARRKEIAAFFGQTSHETTGGSLSAEPFTGGYCFVRQNDQSDRYYGRGPIQLTNQNNYEKAGNAIRQDLVNNPDLVATDATISFKTAIWFWMTPQDNKPSSHDVIIGSWTPSAADQSANRAPGYGVITNIINGGIECGVGPNAAVEDRIGYYRRYCGMLNVAPGDNLDCYNQRNFAQG	-|74	-|7.5	-|1	-|2	-|2	-|1	-|1	-	---	-	1	-	-	-	---	-	-	-	-	-	---	-	1	-	-	-	---	-	-	-	-	gi|19771|emb|CAA35790.1|	100	1e-137	gi|19771|emb|CAA35790.1|	acidic chitinase PR-P [Nicotiana tabacum]	99.6	3e-137	sp|P17513|CHIP_TOBAC	Acidic endochitinase P OS=Nicotiana tabacum PE=1 SV=1	78.21	2e-102	Q43834	Q43834_SOLTU Class II chitinase OS=Solanum tuberosum GN=ChtA2 PE=2 SV=1	STM0233
375	gi|255551551|ref|XP_002516821.1|	methionine sulfoxide reductase, putative [Ricinus communis] >gi|223543909|gb|EEF45435.1| methionine sulfoxide reductase, putative [Ricinus communis]	19058	MAAAGSIQKSEGEWRAILSPEQFHILREKGTERKFTGEYDKFFGEGIYNCAGCETPLYKSTTKFDSGCGWPAFFEGLPGAINRSPDPDGRRTEITCVACGGHLGHVFKGEGHKTPTDERHCVNSVSIKSIGELNQVRPMAENT	127|-	8.4|-	-|-	6|-	6|-	1|-	1|-	0.258	-	3	-	-	-	0.813	-	2	-	-	-	1.364	-	3	-	-	-	0.263	-	2	-	-	-	gi|255551551|ref|XP_002516821.1|	100	1e-80	gi|255551551|ref|XP_002516821.1|	methionine sulfoxide reductase, putative [Ricinus communis] >gi|223543909|gb|EEF45435.1| methionine sulfoxide reductase, putative [Ricinus communis]	80.95	1e-57	sp|Q9ZS91|MSRB5_ARATH	Peptide methionine sulfoxide reductase B5 OS=Arabidopsis thaliana GN=MSRB5 PE=2 SV=1	100	2e-79	B9RSV2	B9RSV2_RICCO Methionine sulfoxide reductase, putative OS=Ricinus communis GN=RCOM_0678850 PE=4 SV=1	SPBC216.04c
376	gi|544741|gb|AAB29519.1|	PSI-E1=14.4 kda photosystem I psaE product {N-terminal} [Nicotiana tabacum, leaves, Peptide Chloroplast Partial, 30 aa]	3744	AAEEAAPPAAAATAEPAEAPVKAXKPXXIG	-|157	-|73.3	-|1	-|3	-|3	-|1	-|1	-	1.194	-	2	-	-	-	1.554	-	2	-	-	-	0.742	-	3	-	-	-	1.786	-	3	-	-	gi|544741|gb|AAB29519.1|	-	-	-	-	-	-	-	-	-	-	-	-	-
377	gi|82941449|dbj|BAE48790.1|	fructose-bisphosphate aldolase [Codonopsis lanceolata]	46141	MSCYKGKYADELIANATYIGTPGKGILAADESTGTIGKRLSSINVENIESNRWALRELLFCTPGALQYLSGVILFEETLYQKTAAGKPFVDVLKENGVLPGIKVDKGTVVLAGTNGETTTQGLDGLGARCAQYYAAGARFAKWRAVLNIGPNEPSQLAINENANGLARYAIICQENGLVPIVEPEILVDGAHDIAKCADVTERVLAACYKALNDHHVLLEGTLLKPNMVTPGSDSAKVAPEVVAEYTIRALQRTMPAAVPAVVFLSGGQSEEQATVNLNAINKYKGKKPWSLTFSFGRALQQSTLKAWAGKEENVAKAQAAFLARCKANSEATLGTYEGGASLSEGAAESLHVKDYKY	390|359	7.3|7.3	-|-	18|14	9|7	2|2	1|1	0.919	0.859	8	5	-	-	1.122	1.049	8	5	-	-	0.879	0.96	8	5	-	-	0.793	0.869	8	5	-	-	gi|82941449|dbj|BAE48790.1|	100	0	gi|82941449|dbj|BAE48790.1|	fructose-bisphosphate aldolase [Codonopsis lanceolata]	83.84	4e-175	sp|O65735|ALF_CICAR	Fructose-bisphosphate aldolase, cytoplasmic isozyme OS=Cicer arietinum GN=ALDC PE=2 SV=1	100	0	Q2WFK8	Q2WFK8_9ASTR Fructose-bisphosphate aldolase OS=Codonopsis lanceolata PE=2 SV=1	mlr3754
378	gi|460372082|ref|XP_004231862.1|	PREDICTED: CBS domain-containing protein CBSX1, chloroplastic-like isoform 1 [Solanum lycopersicum]	32443	MASISPSGSCLHRTPAAFHRQLPCLLLSLPGHILAASTKFYLPLRLSDSRDTFRLASANTLTANSVPPRNGVYTVGDFMTRKEELHVVKPTTSVDEALEALVEHRITGFPVIDDNWKLFPAYVALPSMCETTYLKVGLVSDYDLLALDSVSGTGTADAGIFPEVDSNWKTFNEVQKLLGKTKGKVVGDLMTPAPLVVRESTNLEDAARLLLKTKYRRLPVVDGKGKLVGIITRGNVVRAALQIKRATEMED	131|-	5.6|-	3|-	8|-	8|-	1|-	1|-	2.697	-	5	-	*	-	1.468	-	3	-	-	-	0.617	-	3	-	*	-	1.921	-	3	-	*	-	gi|460372082|ref|XP_004231862.1|	100	9e-134	gi|460372082|ref|XP_004231862.1|	PREDICTED: CBS domain-containing protein CBSX1, chloroplastic-like isoform 1 [Solanum lycopersicum]	71.73	4e-64	sp|O23193|CBSX1_ARATH	CBS domain-containing protein CBSX1, chloroplastic OS=Arabidopsis thaliana GN=CBSX1 PE=1 SV=2	75.29	9e-56	B9HH97	B9HH97_POPTR Predicted protein OS=Populus trichocarpa GN=POPTRDRAFT_719238 PE=4 SV=1	slr0172
379	gi|226530181|ref|NP_001143248.1|	hypothetical protein [Zea mays] >gi|195616584|gb|ACG30122.1| hypothetical protein [Zea mays] >gi|413926267|gb|AFW66199.1| hypothetical protein ZEAMMB73_400795 [Zea mays]	12956	MRTGKGNWQLPFTFSSRIGYTLQAISASSTVYRAINDGICKTDYPFADSYSKTFDNCRKLTFLSLGERIPTRAEGCEDVLLPTFLQIHLGIFPLLRVGGTN	15|-	5.0|-	-|-	1|-	1|-	1|-	1|-	---	-	-	-	-	-	---	-	-	-	-	-	---	-	-	-	-	-	---	-	-	-	-	-	gi|226530181|ref|NP_001143248.1|	100	4e-54	gi|226530181|ref|NP_001143248.1|	hypothetical protein [Zea mays] >gi|195616584|gb|ACG30122.1| hypothetical protein [Zea mays] >gi|413926267|gb|AFW66199.1| hypothetical protein ZEAMMB73_400795 [Zea mays]	-	-	-	-	100	6e-53	B6SZ39	B6SZ39_MAIZE Putative uncharacterized protein OS=Zea mays PE=4 SV=1	-
380	gi|33621084|gb|AAQ23135.1|	thioredoxin H3 [Ipomoea batatas]	17655	MAAATSSEEGQVIACHTVDHWKEQFAKGVETKRLVVVDFTASWCGPCRMIAPILAEIAKKMAHVIFVKVDVDELQAVAAEYKVEAMPTFVFLKDGKEVDRMVGAKKDDLQNCITKHAAAVMTA	-|170	-|8.9	-|1	-|7	-|7	-|1	-|1	-	2.304	-	6	-	*	-	1.295	-	6	-	-	-	0.727	-	6	-	-	-	1.806	-	6	-	*	gi|33621084|gb|AAQ23135.1|	100	5e-66	gi|33621084|gb|AAQ23135.1|	thioredoxin H3 [Ipomoea batatas]	76.86	9e-49	sp|P29449|TRXH1_TOBAC	Thioredoxin H-type 1 OS=Nicotiana tabacum PE=2 SV=1	100	7e-65	Q6VBI4	Q6VBI4_IPOBA Thioredoxin OS=Ipomoea batatas PE=2 SV=1	CT539
381	gi|224084052|ref|XP_002307204.1|	predicted protein [Populus trichocarpa] >gi|222856653|gb|EEE94200.1| predicted protein [Populus trichocarpa]	55951	MASFPNLTNKVKAFSIKCAATTATPLSQSQDLEERVFNFAAGPATLPEKVLKKAQSELYNWHGSGMSVMEMSHRGKEFLSIIQKAEADLRALLNISEDYAVLFLQGGATTQFAAIPLNLVKPEDSVDYVVTGSWGDKAFKEAQKYSKPKVIWSGKSEKYTKIPSFDSLERTPDSKYLHICANETIHGVEFKDYPDPKNGILVADMSSNFCSKPVDVSKFGVIYAGAQKNVGPSGVTIVIIRKDLIGNAQGITPVMLDYKIHAENNSLYNTPPCFGIYMCGLVFDDLLAQGGLKEVEKRNKKKGDLLYNTIDESKGFYRCPVDKSVRSLMNVPFTLEKSELEAEFIKEAAKEKMIQLKGHRSVGGMRASIYNAMPLAGVEKLVAFMKDFQARHA	103|104	9.7|9.7	-|-	5|6	3|3	3|3	2|2	---	---	-	-	-	-	---	---	-	-	-	-	---	---	-	-	-	-	---	---	-	-	-	-	gi|224084052|ref|XP_002307204.1|	100	0	gi|224084052|ref|XP_002307204.1|	predicted protein [Populus trichocarpa] >gi|222856653|gb|EEE94200.1| predicted protein [Populus trichocarpa]	81.31	0	sp|Q96255|SERC_ARATH	Phosphoserine aminotransferase, chloroplastic OS=Arabidopsis thaliana GN=At4g35630 PE=2 SV=1	100	0	B9H657	B9H657_POPTR Phosphoserine aminotransferase OS=Populus trichocarpa GN=POPTRDRAFT_1077772 PE=3 SV=1	PA3167
382	gi|15231245|ref|NP_190164.1|	non-specific serine/threonine protein kinase [Arabidopsis thaliana] >gi|79314333|ref|NP_001030814.1| non-specific serine/threonine protein kinase [Arabidopsis thaliana] >gi|25090817|sp|O48963.1|PHOT1_ARATH RecName: Full=Phototropin-1; AltName: Full=	136887	MEPTEKPSTKPSSRTLPRDTRGSLEVFNPSTQLTRPDNPVFRPEPPAWQNLSDPRGTSPQPRPQQEPAPSNPVRSDQEIAVTTSWMALKDPSPETISKKTITAEKPQKSAVAAEQRAAEWGLVLKTDTKTGKPQGVGVRNSGGTENDPNGKKTTSQRNSQNSCRSSGEMSDGDVPGGRSGIPRVSEDLKDALSTFQQTFVVSDATKPDYPIMYASAGFFNMTGYTSKEVVGRNCRFLQGSGTDADELAKIRETLAAGNNYCGRILNYKKDGTSFWNLLTIAPIKDESGKVLKFIGMQVEVSKHTEGAKEKALRPNGLPESLIRYDARQKDMATNSVTELVEAVKRPRALSESTNLHPFMTKSESDELPKKPARRMSENVVPSGRRNSGGGRRNSMQRIN…	-|58	-|1.9	-|11	-|3	-|2	-|2	-|1	-	---	-	-	-	-	-	---	-	-	-	-	-	---	-	-	-	-	-	---	-	-	-	-	gi|15231245|ref|NP_190164.1|	100	0	gi|15231245|ref|NP_190164.1|	non-specific serine/threonine protein kinase [Arabidopsis thaliana] >gi|79314333|ref|NP_001030814.1| non-specific serine/threonine protein kinase [Arabidopsis thaliana] >gi|25090817|sp|O48963.1|PHOT1_ARATH RecName: Full=Phototropin-1; AltName: Full=Non-phototropic hypocotyl protein 1; AltName: Full=Root phototropism protein 1 >gi|2832241|gb|AAC01753.1| nonphototropic hypocotyl 1 [Arabidopsis thal…	100	0	sp|O48963|PHOT1_ARATH	Phototropin-1 OS=Arabidopsis thaliana GN=PHOT1 PE=1 SV=1	100	0	B9DF94	B9DF94_ARATH AT3G45780 protein (Fragment) OS=Arabidopsis thaliana GN=AT3G45780 PE=2 SV=1	SPAC17G8.14c_2
383	gi|38260466|gb|AAR15395.1|	plastocyanin [Arabidopsis thaliana]	7432	VVFDEDEIPSGVDVAKISMDEQDLLNGAGETYEVALTEPGTYSFYCAPHQGAGMVGKVTVN	36|45	26.2|26.2	-|-	1|1	1|1	1|1	1|1	---	---	-	1	-	-	---	---	-	1	-	-	---	---	-	1	-	-	---	---	-	1	-	-	gi|38260466|gb|AAR15395.1|	100	5e-30	gi|15217918|ref|NP_173459.1|	Plastocyanin major isoform [Arabidopsis thaliana] >gi|12644265|sp|P42699.2|PLAS2_ARATH RecName: Full=Plastocyanin major isoform, chloroplastic; AltName: Full=DNA-damage-repair/toleration protein DRT112; Flags: Precursor >gi|9558592|gb|AAF88155.1|AC026234_6 Contains similarity to a DNA-damage-repair/toleration protein DRT112 precursor from Arabidopsis thaliana gi|1169201 and is a member of the cop…	100	2e-30	sp|P42699|PLAS2_ARATH	Plastocyanin major isoform, chloroplastic OS=Arabidopsis thaliana GN=DRT112 PE=1 SV=2	98.36	3e-28	D7KIZ8	D7KIZ8_ARALL DNA-damage-repair/toleration protein 112 OS=Arabidopsis lyrata subsp. lyrata GN=DRT112 PE=4 SV=1	sll0199
384	gi|359806334|ref|NP_001241227.1|	uncharacterized protein LOC100811958 [Glycine max]	36971	MNFNNVNAPKVPGGGVAALLKVGIIGGLVVYGAANSLYNVEGGHRAIVFNRVVGVKDKVYPEGTHIMIPWFERPVIYDVRARPHLVESTSGSRDLQMVKIGLRVLTRPVPDQLPTVYRTLGENYNERVLPSIIHETLKAVVAQYNASQLITQRENVSREIRKILTQRASQFNIALDDVSITSLTFGKEFTAAIEAKQVAAQEAERAKFVVEKAEQDKRSAVIRAQGEAKSAQLIGEAIANNPAFITLRKIEAAREIAHTISNSANKVYLNSDDLLLNLQELNLEPSGKR	69|-	11.8|-	-|-	3|-	1|-	2|-	1|-	---	-	1	-	-	-	---	-	1	-	-	-	---	-	1	-	-	-	---	-	1	-	-	-	gi|359806334|ref|NP_001241227.1|	100	1e-154	gi|359806334|ref|NP_001241227.1|	uncharacterized protein LOC100811958 [Glycine max]	86.89	4e-128	sp|O49460|PHB1_ARATH	Prohibitin-1, mitochondrial OS=Arabidopsis thaliana GN=PHB1 PE=1 SV=1	100	1e-153	C6TAY3	C6TAY3_SOYBN Uncharacterized protein OS=Glycine max GN=Gma.8831 PE=2 SV=1	YGR231c
385	gi|2832625|emb|CAA16754.1|	putative protein [Arabidopsis thaliana] >gi|7268691|emb|CAB78899.1| putative protein [Arabidopsis thaliana]	79742	MLFFASISTLRKLLLVEDEKVWLLHQIKEKEAGKLDRGYVATVNSKEIKKVGKKEHHLWKKNDSAGSGQKALNLVRMLSGLPNEKEAVYGALNKWVAWEVEFPIIAAAKALQILRKRSQWHRVIQLAKWMLSKGQGATMGTYDILLLAFDMDERADEAESLWNMILHTHTRSIPRRLFARMIALYAHHDLHDKVIEVFADMEELKVSPDEDSARRVARAFRELNQEENRKLILRRYLSEYKYIYFNDQSLSSSSSRSLSFRIRVEMARVCVMMMAMAIAMAMNIAMGDPIAPCYFIFGDSLVDSGNNNRLTSLARANYFPYGIDFQYGPTGRFSNGKTTVDVITELLGFDDYITPYSEARGEDILRGVNYASAAAGIREETGRQLGARITFAGQVANHV…	-|45	-|1.9	-|18	-|2	-|2	-|1	-|1	-	---	-	1	-	-	-	---	-	1	-	-	-	---	-	1	-	-	-	---	-	1	-	-	gi|2832625|emb|CAA16754.1|	100	0	gi|18415211|ref|NP_567570.1|	GDSL esterase/lipase [Arabidopsis thaliana] >gi|75163674|sp|Q93YW8.1|GDL65_ARATH RecName: Full=GDSL esterase/lipase At4g18970; AltName: Full=Extracellular lipase At4g18970; Flags: Precursor >gi|332658713|gb|AEE84113.1| GDSL esterase/lipase [Arabidopsis thaliana]	100	0	sp|Q93YW8|GDL65_ARATH	GDSL esterase/lipase At4g18970 OS=Arabidopsis thaliana GN=At4g18970 PE=2 SV=1	100	0	F4JSC9	F4JSC9_ARATH GDSL esterase/lipase OS=Arabidopsis thaliana GN=At4g18970 PE=4 SV=1	-
386	gi|38344143|emb|CAE01822.2|	OSJNBa0041A02.10 [Oryza sativa Japonica Group] >gi|116310925|emb|CAH67863.1| B0403H10-OSIGBa0105A11.15 [Oryza sativa Indica Group]	45257	MAGASFLSTVRQPPAPPPPLLAPRGSASSVSSPARRHAHILVCCHATAQEEPVRFRRRDLIGGCLTTAIGLELVEGSTGFTGVATAADLIERRQRSEFQSSIKSTLATAITAKKELIPSLLTLALNDAMTYDKATKSGGPNGSVRLRPENSGLSAAVDLLVEAKKEIDSYSKGGPIAFADLIQFAAQSALKLTFVDAAIAKCGGNEEKGRTLYSAYGSNGQWGLFDKLFGRQDTQEPDPEGRVPDWSKASVQEMKDKFVAVGLGPRQLAVMSVFLGPDQAATEERLIADKDCRPWVEKYQRSRETVSRTDYEVDLITTLTKLSSLGQKINYEAYTYPKQKIDLGKLKL	64|21	3.7|3.7	4|4	2|1	2|1	1|1	1|1	1.495	---	2	-	-	-	---	---	-	-	-	-	1.61	---	2	-	-	-	---	---	-	-	-	-	gi|38344143|emb|CAE01822.2|	100	0	gi|38344143|emb|CAE01822.2|	OSJNBa0041A02.10 [Oryza sativa Japonica Group] >gi|116310925|emb|CAH67863.1| B0403H10-OSIGBa0105A11.15 [Oryza sativa Indica Group]	66.97	7e-124	sp|Q9THX6|TL29_SOLLC	Thylakoid lumenal 29 kDa protein, chloroplastic OS=Solanum lycopersicum GN=CLEB3J9 PE=3 SV=1	100	9e-37	A6N036	A6N036_ORYSI Chloroplast l-ascorbate peroxidase (Fragment) OS=Oryza sativa subsp. indica PE=2 SV=1	-
387	gi|118484114|gb|ABK93941.1|	unknown [Populus trichocarpa] >gi|118489718|gb|ABK96660.1| unknown [Populus trichocarpa x Populus deltoides]	23933	MIIPEKNRREISKYLFQEGVCYAKKDFNLAKHPEIDVPNLQVIKLMQSFKSKEYVRETFAWMYYYWYLTNDGIEFLRTYLNLPSEIVPATLKKQAKPAGGRPFGGPPGDRPRGPPRFEGDRPRFGDRDGYRGGPRGGEGGEKGGAPADYQPAFRGTGGRPGFGRGGGGYGAAQTSSPGFT	99|-	22.2|-	2|-	3|-	3|-	3|-	3|-	0.842	-	3	-	-	-	---	-	1	-	-	-	1.485	-	3	-	-	-	---	-	1	-	-	-	gi|118484114|gb|ABK93941.1|	100	4e-50	gi|224079750|ref|XP_002305937.1|	predicted protein [Populus trichocarpa] >gi|224125386|ref|XP_002319573.1| predicted protein [Populus trichocarpa] >gi|222848901|gb|EEE86448.1| predicted protein [Populus trichocarpa] >gi|222857949|gb|EEE95496.1| predicted protein [Populus trichocarpa]	87.5	9e-45	sp|Q9AYP4|RS10_ORYSJ	40S ribosomal protein S10 OS=Oryza sativa subsp. japonica GN=RPS10 PE=2 SV=2	100	8e-56	A9PC38	A9PC38_POPTR Putative uncharacterized protein OS=Populus trichocarpa PE=2 SV=1	SPBP22H7.08
388	gi|151301848|gb|ABR92332.1|	putative aldo/keto reductase 2 [Salvia miltiorrhiza]	45156	MGVNVPTIKLGSQGLEVSKQGLGCMGMSAFYGLPKPDADMIKLIHHAINSGVTFLDTSDMYGPHTNEILIGKALKGGMREKVQLATKFGIINRDGKGEVHGDPAYVRSSCESSLKRLDVDCIDLYYVHRIDTSVPIEITMGELKKLVEEGKIKYIGLSEASASTIRRAHAVHPITAIQNEWSLWSRDLEEELVPACRELGIGIVTYSPLGRGFLSVGPKLIQNLPEGDFRKIFPRFKAENLEANKVVYEKISEMATRKGCTPSQLALAWVHHQGDDVCPIPGTTKINNFNENIGALTVKLTPEEMTELSSLADMVGGERHAFMTSTWVNSDTPPLSSWKVDA	65|-	7.9|-	-|-	3|-	2|-	2|-	1|-	---	-	-	-	-	-	---	-	-	-	-	-	---	-	-	-	-	-	---	-	-	-	-	-	gi|151301848|gb|ABR92332.1|	100	0	gi|151301848|gb|ABR92332.1|	putative aldo/keto reductase 2 [Salvia miltiorrhiza]	78.45	5e-140	sp|P40691|A115_TOBAC	Auxin-induced protein PCNT115 OS=Nicotiana tabacum PE=2 SV=1	100	0	A6ZI63	A6ZI63_SALMI Putative aldo/keto reductase 2 OS=Salvia miltiorrhiza PE=2 SV=1	DR2261
389	gi|449436353|ref|XP_004135957.1|	PREDICTED: photosystem II stability/assembly factor HCF136, chloroplastic-like [Cucumis sativus] >gi|449488796|ref|XP_004158174.1| PREDICTED: photosystem II stability/assembly factor HCF136, chloroplastic-like [Cucumis sativus]	50180	MATLQQQLLKPSWTSSLFASSTSPRHSLSQPQLLPRTLSSTTPKASLHNSSINRRHFVADTAAAVSLSLSPFIAPVQPAKSEESLSEWERLYLPIDPGVVLLDIAFVPDDMNHGFLLGTRQTILETKDGGRTWAPRSIPSAEEEDFNYRFNSISFKGKEGWIVGKPAILLYTSDAGESWERIPLSAQLPGDMVYIKATGEKSAEMVTDEGAIYVTSNKGYNWKAAVQETVSATLNRTVSSGISGASYYTGTFNTVNRSPDGRYVAVSSRGNFYLTWEPGQPFWQPHNRAIARRIQNMGWRADGGLWLLVRGGGLFLSKGTGISEEFEEVPVQSRGFGILDVGYRSKEEAWAAGGSGVLLKTTNGGRSWTRDKAADNIAANLYSVKFINDKKGFVLGNDG…	-|488	-|19.2	-|-	-|20	-|2	-|6	-|1	-	---	-	1	-	-	-	---	-	-	-	-	-	---	-	1	-	-	-	---	-	-	-	-	gi|449436353|ref|XP_004135957.1|	100	0	gi|449436353|ref|XP_004135957.1|	PREDICTED: photosystem II stability/assembly factor HCF136, chloroplastic-like [Cucumis sativus] >gi|449488796|ref|XP_004158174.1| PREDICTED: photosystem II stability/assembly factor HCF136, chloroplastic-like [Cucumis sativus]	96.15	5e-07	sp|P84561|P2SAF_POPEU	Photosystem II stability/assembly factor HCF136, chloroplastic (Fragment) OS=Populus euphratica PE=1 SV=1	87.05	3e-173	G7JPH8	G7JPH8_MEDTR Photosystem II stability/assembly factor HCF136 OS=Medicago truncatula GN=MTR_4g075040 PE=4 SV=1	slr2034
390	gi|460396218|ref|XP_004243675.1|	PREDICTED: probable prefoldin subunit 1-like isoform 1 [Solanum lycopersicum]	18733	MADEANRTAFIEIQGRMIETTGKLKQVQTQIRNKETEKKRAYLTLEELKQLSDDTNTYKAIGRTFVLEPKAVLMNEQEQKLKDGETAIASLQTSKEYLEKHMAEVENNLRELLQQDPGLARQIMTMSVA	-|38	-|15.5	-|1	-|2	-|2	-|2	-|2	-	---	-	-	-	-	-	---	-	-	-	-	-	---	-	-	-	-	-	---	-	-	-	-	gi|460396218|ref|XP_004243675.1|	100	4e-69	gi|460396218|ref|XP_004243675.1|	PREDICTED: probable prefoldin subunit 1-like isoform 1 [Solanum lycopersicum]	39.25	4e-14	sp|Q5RAM7|PFD1_PONAB	Prefoldin subunit 1 OS=Pongo abelii GN=PFDN1 PE=2 SV=1	86.05	5e-57	F6H9Q5	F6H9Q5_VITVI Putative uncharacterized protein OS=Vitis vinifera GN=VIT_11s0065g00480 PE=4 SV=1	-
391	gi|39725276|emb|CAC85227.1|	salt tolerance protein 1 [Beta vulgaris]	49292	MTTMNPFDLLGDNDNDDPSQLLESATAQLQKIAVKKTPTQVAQQPQQQKAAKLPTKPLPPTQAVREAKNDSQRGGGRGGGRGSGRGRGGYNRDYSNNENAFNSTGVTGSQGDDGERERRPYAGPRGPYRGGRRDGFNNEEGRDGERPRRTYERRSGTGRGSEIKREGAGRGNWGAESDEVAPVTEEAGEQNEKKLNPENLPAVEDAADGIKEGQPDETEEKEPEEKEMTLEEYEKLLEEKRKALSALKAEERKVEVDKDFESMQQLINKKKDEDSVFIKLGSDKDKKKEAAEKEKVKKSVSINEFLKPAEGDRYGGRGRGRGRGPRGGGYGGGNRMFSTSAPAIEDPGEFPTLGGK	75|68	6.7|6.7	-|-	7|5	7|5	2|2	2|2	---	---	-	-	-	-	---	---	-	-	-	-	---	---	-	-	-	-	---	---	-	-	-	-	gi|39725276|emb|CAC85227.1|	100	1e-94	gi|39725276|emb|CAC85227.1|	salt tolerance protein 1 [Beta vulgaris]	-	-	-	-	100	1e-93	Q711N4	Q711N4_BETVU Salt tolerance protein 1 OS=Beta vulgaris GN=sato1 PE=2 SV=1	-
392	gi|255564826|ref|XP_002523407.1|	protein binding protein, putative [Ricinus communis] >gi|223537357|gb|EEF38986.1| protein binding protein, putative [Ricinus communis]	47082	MSLAPSSYASLYTSPPLPRTITIKQNPLIFSQNNPFFSKNCSFFTTSTSFSSTHLLKPSNLTVKASETESKASKSESGSTEGEGEEQYEEYEVELLQPYGIKFAKGRDGATYIDAIAPGGAADKTGMFTVGDKVIATSAVFGTEIWPAAEYGRTMYTIRQRIGPLLMKLQKRYGKTDYAGEMTEKEIIRAERNSGFISDRVREIQMQNYLRKKEQKAQREKDLRDGLILYKNAKYEEALERFESVLGSKPDPNEASVASYNVACCYSKLNQLKAGLSALKDAMEAGFEDFKRIRTDPDLANLRTSEEFEPLLKRFDESFINENAINAIKSLFGFNKK	42|-	5.3|-	-|-	4|-	4|-	2|-	2|-	---	-	-	-	-	-	---	-	-	-	-	-	---	-	-	-	-	-	---	-	-	-	-	-	gi|255564826|ref|XP_002523407.1|	100	8e-166	gi|255564826|ref|XP_002523407.1|	protein binding protein, putative [Ricinus communis] >gi|223537357|gb|EEF38986.1| protein binding protein, putative [Ricinus communis]	-	-	-	-	100	8e-165	B9SBN8	B9SBN8_RICCO Protein binding protein, putative OS=Ricinus communis GN=RCOM_0342940 PE=4 SV=1	-
393	gi|145666464|gb|ABP88739.1|	protein disulfide isomerase [Zea mays]	71827	MAIRSKAWISLLLALAVALSARAEEEPAAAAEGEAVLTLDVDSFDEAVAKHPFMVVEFYAPWCGHCKKLAPEYENAAKALSKHDPPIVLAKVDANEEKNRPLATKYEIQGFPTIKIFRDQGKNIQEYKGPREADGIVDYLKKQVGPASKEIKSPEDAAALIDDKKIYIVGIFAEFSGTEFTNFMEVAEKLRSDYDFGHTLHANHLPRGDAAVERPLVRLLKPFDELVVDSKDFDVAALMKFIDASTIPRVVTFDKNPDNHPYLMKFFQSSAPKAMLFLNFSTGPFDSFKSAYSAAAEEFKDKEIKFLIGDIEASQGAFQYFGLKEDQTPLILIQDGDSKKFLKVHVEADQIVSWLKEYFDGKLTPFRKSEPIPEVNNEPVKVVVADNVHDFVFKSGKNV…	-|64	-|4.5	-|3	-|3	-|2	-|2	-|1	-	---	-	1	-	-	-	---	-	1	-	-	-	---	-	1	-	-	-	---	-	1	-	-	gi|145666464|gb|ABP88739.1|	100	0	gi|145666464|gb|ABP88739.1|	protein disulfide isomerase [Zea mays]	99.18	0	sp|P52588|PDI_MAIZE	Protein disulfide-isomerase OS=Zea mays GN=PDI PE=2 SV=1	100	0	A5A5E7	A5A5E7_MAIZE Protein disulfide isomerase OS=Zea mays PE=2 SV=1	SPAC1F5.02
394	gi|1097877|prf||2114378A	aminolevulinate dehydratase	53954	MASAAMLNAPCNIGAVKFEVKLKPSPNLFCARPSVKLNQRRVLTIRASKEGHDNGSSSGPLRKMGLTDEECEAAVVAGNVPEAPPVPPKPAAPDGTPIVSSLPINRRPRRNRRSSAARAAFQETNISPANLVYPLFIHEGEEDTPIGAMPGCYRLGWRHGLVEEVAKARDVGVNSIVLFPKVPDALKTSTGDEAYNDNGLVPRTIRLLKDKYPDLVIYTDVALDPYSSDGHDGIVREDGVIMNDETVHQLCKQAVAQARAGADVVSPSDMMDGRVGAIRAALDAEGFQHVSIMSYTAKYASSFYGPFREALDSNPRFGDKKTYQMNPANYREALVEMQADESEGADILLVKPGLPYLDIIRLLRDKSPLPIAAYQVSGEYSMIKAGGVLKMIDEERVMM…	66|42	6.3|2.8	3|3	6|1	2|1	2|1	1|1	---	---	1	-	-	-	---	---	1	-	-	-	---	---	1	-	-	-	---	---	1	-	-	-	gi|1097877|prf||2114378A	100	0	gi|1097877|prf||2114378A	aminolevulinate dehydratase	91.96	1e-171	sp|P43210|HEM2_SOYBN	Delta-aminolevulinic acid dehydratase, chloroplastic OS=Glycine max GN=HEMB PE=2 SV=1	95.67	5e-112	C6L811	C6L811_CUCSA Delta-aminolevulinic acid dehydratase (Fragment) OS=Cucumis sativus GN=CsALAD PE=2 SV=1	all4725
395	gi|17682|emb|CAA78856.1|	Wilm~s tumor suppressor homologue [Arabidopsis thaliana]	31990	MGRRPARCYRQIKGKPYPKSRYCRGVPDPKIRIYDVGMKRKGVDEFPFCVHLVSWEKENVSSEALEAARIACNKYMVKSAGKDAFHLRIRVHPSHVLRINKMLSCAGADRLQTGMRGAFGKALGTCARVAIGQVLLSVRCKDAHGHHAQEALRRAKFKFPGRQKIIVSRKWGFTKFNRADFTKLRQEKRVVPDGVNAKFLSCHGPLANRQPGSAFLPAHY	-|118	-|5.5	-|90	-|4	-|4	-|1	-|1	-	3.43	-	3	-	*	-	0.72	-	2	-	-	-	0.512	-	3	-	-	-	1.074	-	2	-	-	gi|17682|emb|CAA78856.1|	100	2e-64	gi|14190449|gb|AAK55705.1|AF378902_1	At1g14320/F14L17_28 [Arabidopsis thaliana] >gi|15215903|gb|AAK91495.1| At1g14320/F14L17_28 [Arabidopsis thaliana]	99.55	1e-126	sp|Q93VT9|RL101_ARATH	60S ribosomal protein L10-1 OS=Arabidopsis thaliana GN=RPL10A PE=1 SV=1	99.55	3e-125	D7KBJ0	D7KBJ0_ARALL Putative uncharacterized protein OS=Arabidopsis lyrata subsp. lyrata GN=ARALYDRAFT_888807 PE=4 SV=1	SPAP7G5.05
396	gi|307136401|gb|ADN34210.1|	chromatin remodeling complex subunit [Cucumis melo subsp. melo]	326874	SARDWKGMRISCKMIMEEQGIMEWIKIWLPVFSINGDIVWGFKNGMKEDESSSGKVISRNWVMKRKRRKLSSATDLPGKREDGSFAIESPRSISLAKGKVKSEGHHDQFSSKKKGNDGYFFECVVCDLGGNLLCCDSCPRTYHLQCLNPPLKRIPMGKWHCPTCNQKNDLPLDATSYLDTISKRARTKVVSAKCKNGIKSSDTEKVSRIFGSSILAKKRSSNKRKSILAHKVKTFGRKSVTPSIDVSCNAKPSHPLDGNTVKSTSSPVNIDDEKVCNASPSGSQTEEKSVPPVMEVLADSKAEKLEPCDNVPDKNLDVVENEVAISCENASPSKNPVLAVPTAGKETRKRKKKINKDVGQKKPKTGKATCVTGTSKKLRCKIDTSSPGNSKSVRKQKNV…	16|-	0.8|-	1|-	1|-	1|-	1|-	1|-	---	-	-	-	-	-	---	-	-	-	-	-	---	-	-	-	-	-	---	-	-	-	-	-	gi|307136401|gb|ADN34210.1|	100	0	gi|307136401|gb|ADN34210.1|	chromatin remodeling complex subunit [Cucumis melo subsp. melo]	66.67	1e-12	sp|Q8TDI0|CHD5_HUMAN	Chromodomain-helicase-DNA-binding protein 5 OS=Homo sapiens GN=CHD5 PE=2 SV=1	100	0	E5GCL1	E5GCL1_CUCME Chromatin remodeling complex subunit (Fragment) OS=Cucumis melo subsp. melo PE=4 SV=1	YER164w
397	gi|17224770|gb|AAL37106.1|	ATP synthase beta subunit [Burmannia lutescens] >gi|17224774|gb|AAL37108.1| ATP synthase beta subunit [Geomitra clavigera]	20576	AHLDATTVLSRGLAAKGIYPAVDPLDSTSTMLQPRIVGEEHYETAQRVKQTLQRYKELQDIIAILGLDELSEEDRLTVARARKIERFLSQPFFVAEVFTGSPGKYVGLVETIRGFKLILSGELDSLPEQAFYLVGNIDEATAKATNLEMESKLKK	-|1234	-|27.1	-|-	-|43	-|2	-|3	-|1	-	---	-	1	-	-	-	---	-	1	-	-	-	---	-	1	-	-	-	---	-	1	-	-	gi|17224770|gb|AAL37106.1|	100	9e-85	gi|17224770|gb|AAL37106.1|	ATP synthase beta subunit [Burmannia lutescens] >gi|17224774|gb|AAL37108.1| ATP synthase beta subunit [Geomitra clavigera]	98.71	2e-84	sp|Q49KZ1|ATPB_EUCGG	ATP synthase subunit beta, chloroplastic OS=Eucalyptus globulus subsp. globulus GN=atpB PE=3 SV=1	100	1e-83	Q8WJF8	Q8WJF8_9LILI ATP synthase beta subunit (Fragment) OS=Burmannia lutescens GN=atpB PE=4 SV=1	slr1329
398	gi|147818069|emb|CAN62794.1|	hypothetical protein VITISV_026837 [Vitis vinifera]	115075	MPKRALIGALLIANMLTATRLSFSIQPLVRRSSYSLICPKHFPKSRPCPLWSSSFSFCLQNPHRSPTCPSIVPFSSHCSAPSMATVPQSTPEVNPLLLDFDFPPFDAVKADHVIPGIRTMLNQLENDLIELESKVEPTWPKLVDPLEKLVDRLSVVWGIVNHLKSVKDSSELRSAIEEVQPDKVKFELRLGQSKPIYNAFKAIQESPEWQTLSDAQKRIVDSQIKQAVLSGVSLEDDKKEHFNKIQQELEKLSQKFEENVLDATKNFGKLITDKKDIEGLPATALGLAAQTAVSKGHKDATAENGPWIITLDGPSFLSVMQHAQNRSLRKEVYYAYVTRASSGDLDNTEIIGQILKLRLEKAKLLGYSNYAEVSMATKMATVDKAEELLEKLRSASWDA…	-|105	-|2.3	-|2	-|2	-|2	-|1	-|1	-	1.932	-	2	-	-	-	1.438	-	2	-	-	-	1.165	-	2	-	-	-	3.076	-	2	-	-	gi|147818069|emb|CAN62794.1|	100	0	gi|297736681|emb|CBI25698.3|	unnamed protein product [Vitis vinifera]	50.72	1e-11	sp|P44573|OPDA_HAEIN	Oligopeptidase A OS=Haemophilus influenzae (strain ATCC 51907 / DSM 11121 / KW20 / Rd) GN=prlC PE=3 SV=1	100	0	A5ATE5	A5ATE5_VITVI Putative uncharacterized protein OS=Vitis vinifera GN=VITISV_026837 PE=3 SV=1	alr0880
399	gi|303274068|ref|XP_003056358.1|	predicted protein [Micromonas pusilla CCMP1545] >gi|226462442|gb|EEH59734.1| predicted protein [Micromonas pusilla CCMP1545]	105718	MFPADQEIDRKSTRGPEDEIWKLVAGWSSRFLHLTSASSSSYFIQQQLNMLRALSVSTRALQPPLDTSRFDVPLPHNGSSTSDKRDIAELRSTFKIHRWYTDFYHKKQSEVARILRYRIELLKDRVICCDSVICSSVEIRTLIRNIQVDYWKVEGRSLVLRLKCARLASENQRQLNFAETLSSRLRYIDELETITGEVKGLLCKDESCDYIWHLRRLDHCFLFVDNRKNYSEYTGLSLKCKQLRGRILSAVRSHIAATVLDSVREAKQSHIDSENATCRTHQEHGVQGSSFFNAAFYVNFCSAMASLKPILGELYAQAQSRRSTNWREAFAQVLIDCHSNYCNQRFSLVSEVFQNQLLEHFKGRSLLVFVHIGFTYLLQICQAELELSEKSFPLTNDAS…	24|-	1.3|-	-|-	1|-	1|-	1|-	1|-	---	-	-	-	-	-	---	-	-	-	-	-	---	-	-	-	-	-	---	-	-	-	-	-	gi|303274068|ref|XP_003056358.1|	100	0	gi|303274068|ref|XP_003056358.1|	predicted protein [Micromonas pusilla CCMP1545] >gi|226462442|gb|EEH59734.1| predicted protein [Micromonas pusilla CCMP1545]	31	3e-21	sp|Q16ZN9|COG3_AEDAE	Conserved oligomeric Golgi complex subunit 3 OS=Aedes aegypti GN=Cog3 PE=3 SV=1	100	0	C1MKB5	C1MKB5_MICPC Predicted protein OS=Micromonas pusilla (strain CCMP1545) GN=MICPUCDRAFT_64293 PE=4 SV=1	-
400	gi|147811591|emb|CAN70298.1|	hypothetical protein VITISV_001396 [Vitis vinifera]	210120	MGLKVVPNGLGIPIWAKGTFNPGIILTESNYDVWSQLVEMHIAELSYIRGKTNLLKESEDGYEKWYVENQKVKRWLLMSMSPEIMKRYLRLPTAQEIWSALSKAFYDGSDELQVFTLNQKDFIAKQNGRSLSEYYGELTELFCELDHRDKVVMKDPKDIATYRKSIERQPVHIFLAGLGGDFEQVRGEILRKDPLPDLEECYALIRREAVRHANMKAESDNPNTLAMDQSKTNHPKTDPNIDKSTFKCTHCNKTGHTKSRCFEIVGYPDCYCEIKTEANVDEKASALIVATDYSDHMTFDSRQVSPARPSSQKFVSTANGNTTPIIGEGSLTLTDTLNLDSILVAPSLNYNLLSVSQITAALYCIVIFWPEFCVFKDIQTRQTIGFGIKRGKLYYLDLQ…	-|35	-|0.6	-|-	-|1	-|1	-|1	-|1	-	---	-	-	-	-	-	---	-	-	-	-	-	---	-	-	-	-	-	---	-	-	-	-	gi|147811591|emb|CAN70298.1|	100	0	gi|147811591|emb|CAN70298.1|	hypothetical protein VITISV_001396 [Vitis vinifera]	42.86	3e-15	sp|P92520|M820_ARATH	Uncharacterized mitochondrial protein AtMg00820 OS=Arabidopsis thaliana GN=AtMg00820 PE=4 SV=1	100	0	A5BLI4	A5BLI4_VITVI Putative uncharacterized protein OS=Vitis vinifera GN=VITISV_001396 PE=4 SV=1	-
401	gi|357137814|ref|XP_003570494.1|	PREDICTED: uncharacterized protein LOC100836560 [Brachypodium distachyon]	10525	MENSWDEEERVVAAARAVVVHSQVRRIKQEEGEKGKVHETFQHQAAAASSSGTRLPLRDLAASGNQPRSRSPLGRRPPAISIGGDS	31|33	17.4|17.4	-|-	1|1	1|1	1|1	1|1	---	---	-	-	-	-	---	---	-	-	-	-	---	---	-	-	-	-	---	---	-	-	-	-	gi|357137814|ref|XP_003570494.1|	100	6e-21	gi|357137814|ref|XP_003570494.1|	PREDICTED: uncharacterized protein LOC100836560 [Brachypodium distachyon]	-	-	-	-	-	-	-	-	-
402	gi|460381318|ref|XP_004236398.1|	PREDICTED: clavaminate synthase-like protein At3g21360-like [Solanum lycopersicum]	24856	MKNKYPEFVERLEEHGLIYIRVLGEDDDPSSPIGRGWKSTFLTKDKSVAEERAAKLGMKLEWLEDGVKTVMGPIPGIKFNEERQQKIWFNSMVAAYTGWKDAKNDPVKAVTFGDGQPLPAEVVHDCLSILEDESVAIPWKKGDVLLIDNLAVLHSRKSFNPPRRVLASLCK	-|33	-|8.8	-|-	-|1	-|1	-|1	-|1	-	---	-	-	-	-	-	---	-	-	-	-	-	---	-	-	-	-	-	---	-	-	-	-	gi|460381318|ref|XP_004236398.1|	100	2e-96	gi|460381318|ref|XP_004236398.1|	PREDICTED: clavaminate synthase-like protein At3g21360-like [Solanum lycopersicum]	77.91	7e-79	sp|Q9LIG0|Y3136_ARATH	Clavaminate synthase-like protein At3g21360 OS=Arabidopsis thaliana GN=At3g21360 PE=1 SV=1	81.87	2e-81	C6T8I5	C6T8I5_SOYBN Putative uncharacterized protein OS=Glycine max PE=2 SV=1	-
403	gi|116786768|gb|ABK24229.1|	unknown [Picea sitchensis] >gi|224286220|gb|ACN40819.1| unknown [Picea sitchensis]	64449	MALLAEKTVSGREYKVKDMSQADFGRLEIELAEVEMPGLMACRVEFGPAQPFKGARITGSLHMTIQTAVLIETLTALGAEVRWCSCNIFSTQDHAASAIARDSAAVFAWKGETLQEYWWCTERALDWGPGGGPDLIVDDGGDTTLLIHEGVKAEEEFAKTGKVPDPASTTNVEFQIVLALIKESLKVDPLRYHRMKDRIVGVSEETTTGVKRLYQMQNSGSLLFPAINVNDSVTKSKFDNLYGCRHSLPDGLMRATDVMIAGKVAVVCGYGDVGKGCAAAMKVAGARVIVTEIDPICALQALMEGLPVLTLEDVVSTADIFVTTTGNKDIIMLDHMRKMKNNAIVCNIGHFDNEIDIQGLENFPGVKKITIKPQTDRWVFPDTKSGIIVLAEGRLMNLG…	-|66	-|9.3	-|2	-|5	-|3	-|3	-|2	-	3.29	-	2	-	-	-	1.485	-	2	-	-	-	0.494	-	2	-	-	-	2.296	-	2	-	-	gi|116786768|gb|ABK24229.1|	100	0	gi|116786768|gb|ABK24229.1|	unknown [Picea sitchensis] >gi|224286220|gb|ACN40819.1| unknown [Picea sitchensis]	90.52	0	sp|P68173|SAHH_TOBAC	Adenosylhomocysteinase OS=Nicotiana tabacum GN=SAHH PE=2 SV=1	100	0	A9NUB8	A9NUB8_PICSI Adenosylhomocysteinase OS=Picea sitchensis PE=2 SV=1	CC0257
404	gi|6652880|gb|AAF22522.1|AF123391_1	26S proteasome AAA-ATPase subunit RPT2a [Arabidopsis thaliana]	62329	MGQGPSGGLNRQGDRKPDGGDKKEKKFEPAAPPARVVRKQRKQKGPEAAARLPTVTPSTKCKLRLLKLERIKDYLLMEEEFVANQERLKPQEEKAEEDRSKVDDLRGTPMSVGNLEELIDENHAIVSSSVGPEYYVGILSFVDKDQLEPGCSILMHNKVLSVVGILQDEVDPMVSVMKVEKAPLESYADIGGLEAQIQEIKEAVELPLTHPELYEDIGIKPPKGVILYGEPGTGKTLLAKAVANSTSATFLRVVGSELIQKYLGDGPKLVRELFRVADDLSPSIVFIDEIDAVGTKRYDAHSGGEREIQRTMLELLNQLDGFDSRGDVKVILATNRIESLDPALLRPGRIDRKIEFPLPDIKTRRRIFQIHTSKMTLSEDVNLEEFVMTKDEFSGADIK…	52|73	7.4|7.4	28|28	2|2	1|2	2|2	1|2	---	1.652	-	2	-	-	---	---	-	1	-	-	---	0.8	-	2	-	-	---	---	-	1	-	-	gi|6652880|gb|AAF22522.1|AF123391_1	100	0	gi|6652880|gb|AAF22522.1|AF123391_1	26S proteasome AAA-ATPase subunit RPT2a [Arabidopsis thaliana]	99.77	0	sp|Q9SZD4|PRS4A_ARATH	26S proteasome regulatory subunit 4 homolog A OS=Arabidopsis thaliana GN=RPT2A PE=2 SV=1	99.32	0	D7MD55	D7MD55_ARALL Regulatory particle triple-a 2A OS=Arabidopsis lyrata subsp. lyrata GN=RPT2A PE=3 SV=1	SPBC4.07c
405	gi|357444835|ref|XP_003592695.1|	hypothetical protein MTR_1g114040 [Medicago truncatula] >gi|358345306|ref|XP_003636722.1| hypothetical protein MTR_053s1055 [Medicago truncatula] >gi|355481743|gb|AES62946.1| hypothetical protein MTR_1g114040 [Medicago truncatula] >gi|355502657|gb|A	10024	MVRALTLGLFNGKLYNLTEYLLVKEFKASRHTKENRRKASRLGKIFDERWCDRIYMIEINCQGVF	-|24	-|20.0	-|-	-|1	-|1	-|1	-|1	-	---	-	-	-	-	-	---	-	-	-	-	-	---	-	-	-	-	-	---	-	-	-	-	gi|357444835|ref|XP_003592695.1|	100	2e-31	gi|357444835|ref|XP_003592695.1|	hypothetical protein MTR_1g114040 [Medicago truncatula] >gi|358345306|ref|XP_003636722.1| hypothetical protein MTR_053s1055 [Medicago truncatula] >gi|355481743|gb|AES62946.1| hypothetical protein MTR_1g114040 [Medicago truncatula] >gi|355502657|gb|AES83860.1| hypothetical protein MTR_053s1055 [Medicago truncatula]	-	-	-	-	100	2e-30	G7IDE0	G7IDE0_MEDTR Putative uncharacterized protein OS=Medicago truncatula GN=MTR_053s1055 PE=4 SV=1	-
406	gi|388514195|gb|AFK45159.1|	unknown [Lotus japonicus]	70089	MAMAMALRRLSSSIDKPLRPLFNASSVYYKSSLPDEAVYEKTTVTWPKQLNAPLEVVDPEIADIIEHEKARQWKGLELIPSENFTSLSVMQAVGSVMTNKYSEGYPGARYYGGNEFIDMAETLCQKRALEAFRLDPAKWGVNVQPLSGSPSNFHVYTALLKPHDRIMALDLPHGGHLSHGYQTDTKKISAVSIFFETMPYRLDESTGYIDYDQLEASAKLFRPKLIVAGASAYARLYDYDRIRKVCDKQKAVLLADMAHISGLVAAGVIPSPFDYADVVTTTTHKSLRGPRGAMIFFRKGVKEINKQGKEVLYDYEDKINQAVFPGLQGGPHNHTITGLAVALKQATTPEYKAYQEQVLSNCSKFAQALSERGYELVSGGTENHLVLVNLKNKGIDGSR…	371|317	13.6|13.6	-|-	18|15	1|1	6|6	1|1	---	---	-	-	-	-	---	---	-	-	-	-	---	---	-	-	-	-	---	---	-	-	-	-	gi|388514195|gb|AFK45159.1|	100	0	gi|388514195|gb|AFK45159.1|	unknown [Lotus japonicus]	91.12	0	sp|P34899|GLYM_PEA	Serine hydroxymethyltransferase, mitochondrial OS=Pisum sativum PE=1 SV=1	92.84	0	C6ZJZ0	C6ZJZ0_SOYBN Serine hydroxymethyltransferase OS=Glycine max PE=2 SV=1	SPAC18G6.04c
407	gi|15242719|ref|NP_198865.1|	heterogeneous nuclear ribonucleoprotein A1/A3 [Arabidopsis thaliana] >gi|22531255|gb|AAM97131.1| ribonucleoprotein-like [Arabidopsis thaliana] >gi|332007170|gb|AED94553.1| heterogeneous nuclear ribonucleoprotein A1/A3 [Arabidopsis thaliana]	49378	MDPYGTETVIEDEIHDPKPSEDIEDDDDKSQPHSGGGVDSAGKIFVGGLARETTSAEFLKHFGKYGEITDSVIMKDRKTGQPRGFGFVTYADSSVVDKVIQDNHIIIGKQVEIKRTIPRGSMSSNDFKTKKIFVGGIPSSVDDDEFKEFFMQFGELKEHQIMRDHSTGRSRGFGFVTYESEDMVDHLLAKGNRIELSGTQVEIKKAEPKKPNSVTTPSKRFGDSRSNFGGGYGDGYGGGHGGGYGGPGGPYKSGGGYGGGRSGGYGGYGGEFGGYGGGGYGGGVGPYRGEPALGYSGRYGGGGGGYNRGGYSMGGGGGYGGGPGDMYGGSYGEPGGGYGGPSGSYGGGYGSSGIGGYGGGMGGAGGGGYRGGGGYDMGGVGGGGAGGYGAGGGGNGGGS…	23|-	2.6|-	17|-	1|-	1|-	1|-	1|-	---	-	-	-	-	-	---	-	-	-	-	-	---	-	-	-	-	-	---	-	-	-	-	-	gi|15242719|ref|NP_198865.1|	100	1e-132	gi|15242719|ref|NP_198865.1|	heterogeneous nuclear ribonucleoprotein A1/A3 [Arabidopsis thaliana] >gi|22531255|gb|AAM97131.1| ribonucleoprotein-like [Arabidopsis thaliana] >gi|332007170|gb|AED94553.1| heterogeneous nuclear ribonucleoprotein A1/A3 [Arabidopsis thaliana]	50	1e-07	sp|Q9FZ84|RBG6_ARATH	Glycine-rich RNA-binding protein 6, mitochondrial OS=Arabidopsis thaliana GN=RBG6 PE=2 SV=1	100	2e-131	Q9FM47	Q9FM47_ARATH Heterogeneous nuclear ribonucleoprotein A1/A3 OS=Arabidopsis thaliana GN=At5g40490 PE=2 SV=1	all2777
408	gi|242060700|ref|XP_002451639.1|	hypothetical protein SORBIDRAFT_04g005040 [Sorghum bicolor] >gi|241931470|gb|EES04615.1| hypothetical protein SORBIDRAFT_04g005040 [Sorghum bicolor]	79936	MAYGDRVTTFEDSEKESEYGYVRKVSGPVVVADGMGGAAMYELVRVGHDNLIGEIIRLEGDSATIQVYEETAGLMVNDPVLRTRKPLSVELGPGILGNIFDGIQRPLKTIAIKSGDVYIPRGVSVPALDKDVLWEFQPKKLGVGDVITGGDLYATVFENTLMQHHVALPPGSMGKVSYIAPAGQYSLQDTVLELEFQGIKKKFTMLQTWPVRSPRPVASKLAADTPLLTGQRVLDALFPSVLGGTCAIPGAFGCGKTVISQALSKYSNSEAVVYVGCGERGNEMAEVLMDFPQLTMTLPDGREESVMKRTTLVANTSNMPVAAREASIYTGITIAEYFRDMGYNVSMMADSTSRWAEALREISGRLAEMPADSGYPAYLAARLASFYERAGKVKCLGSP…	691|-	19.3|-	-|-	26|-	3|-	8|-	1|-	1.265	-	2	-	-	-	---	-	-	-	-	-	0.771	-	2	-	-	-	---	-	-	-	-	-	gi|242060700|ref|XP_002451639.1|	100	0	gi|242060700|ref|XP_002451639.1|	hypothetical protein SORBIDRAFT_04g005040 [Sorghum bicolor] >gi|241931470|gb|EES04615.1| hypothetical protein SORBIDRAFT_04g005040 [Sorghum bicolor]	98.75	0	sp|P49087|VATA_MAIZE	V-type proton ATPase catalytic subunit A (Fragment) OS=Zea mays PE=2 SV=1	100	0	C5XW73	C5XW73_SORBI Putative uncharacterized protein Sb04g005040 OS=Sorghum bicolor GN=Sb04g005040 PE=3 SV=1	SPAC343.05
409	gi|116781417|gb|ABK22092.1|	unknown [Picea sitchensis]	27931	MQGALRSIQLHGGIFKNSILQHLRVAEPSFRSKIIARHESVSPARLEESGFESTTIADILKGKGKSADGSWLWCTTDDTVYDAVKSMTQHNVGALLVVKPVEEKSIAGIITERDYLRKIIVQGRSSKTTKVGDIMTEENKLITVTSDTKVLKAMQLMTDNRIRHIPVVEGKSMLGMVSIGDVVRAVVDEHREELKRLNAFIQGGY	52|43	4.4|4.4	18|8	2|2	2|2	1|1	1|1	2.194	---	2	1	-	-	0.953	---	2	1	-	-	0.693	---	2	1	-	-	1.302	---	2	1	-	-	gi|116781417|gb|ABK22092.1|	100	7e-17	gi|383141993|gb|AFG52350.1|	Pinus taeda anonymous locus CL1133Contig1_04 genomic sequence >gi|383141995|gb|AFG52351.1| Pinus taeda anonymous locus CL1133Contig1_04 genomic sequence >gi|383141997|gb|AFG52352.1| Pinus taeda anonymous locus CL1133Contig1_04 genomic sequence >gi|383141999|gb|AFG52353.1| Pinus taeda anonymous locus CL1133Contig1_04 genomic sequence >gi|383142001|gb|AFG52354.1| Pinus taeda anonymous locus CL1133C…	76.7	1e-90	sp|Q9LEV3|CBSX3_ARATH	CBS domain-containing protein CBSX3, mitochondrial OS=Arabidopsis thaliana GN=CBSX3 PE=1 SV=1	100	2e-115	A9NN81	A9NN81_PICSI Putative uncharacterized protein OS=Picea sitchensis PE=2 SV=1	PA0250
410	gi|356518485|ref|XP_003527909.1|	PREDICTED: TPR repeat-containing thioredoxin TTL1-like [Glycine max]	95506	MAEKTKNKVEVQLGCGLMGRIFHLKTNNRTRKSSVHSLPVKVCNNTAQQQRDQAKNEAKPSPNHESNVPRDSSIGTIPTLKVEQNPARKSSSSHRAPSAYQNTQNGRASDAARTSIQRSHDSNEESKQQQKEHAVVNSLELARISTSANHHHHQNNETKSLAKEFVLPITGNLLVNSSPRTSITKSKELNTLSGSCSYNSNNSTNKGMMGNIMRKNSDELAQFRSPRNGRVDPEVLKSMGNEAYKQGRFEEALTLYDRAIAVDSKKATYHCNKSAALIGLGRFLQAIVECEEAIKLEPSYGRAHTRLATIYFRLGEAEKALNCNETSSCVDSVLAFQAQALQNHLSKCTEARKVKDWKVILNETQAAISLGADSAPLVYSLHTEALLKLLRHQEAHATY…	39|-	1.9|-	-|-	1|-	1|-	1|-	1|-	---	-	-	-	-	-	---	-	-	-	-	-	---	-	-	-	-	-	---	-	-	-	-	-	gi|356518485|ref|XP_003527909.1|	100	0	gi|356518485|ref|XP_003527909.1|	PREDICTED: TPR repeat-containing thioredoxin TTL1-like [Glycine max]	44.35	1e-109	sp|Q9MAH1|TTL1_ARATH	TPR repeat-containing thioredoxin TTL1 OS=Arabidopsis thaliana GN=TTL1 PE=1 SV=1	97.35	0	I1KA03	I1KA03_SOYBN Uncharacterized protein OS=Glycine max PE=4 SV=1	FN1787
411	gi|302784560|ref|XP_002974052.1|	hypothetical protein SELMODRAFT_442274 [Selaginella moellendorffii] >gi|300158384|gb|EFJ25007.1| hypothetical protein SELMODRAFT_442274 [Selaginella moellendorffii]	53838	MASKDSEQVNLADAQKLWNALQGIPGLGDGDAFIHFLRILHLGMLVRQAPIEHAKKGQVSDVLCCGITEQGTRVVGANVRLRMDMAGGRPNPVSIKDVEKRLGVQVSAFDDDTHSRLHLALLDEDKEAKPSKGRDFENCAEHVVFEKLARVNESADTTYAVQKHQKKKGESNVVCVKRCVNCLKAGGASSSSGGPFGETPRLGAIVTDHDSIAGLSVPINTMPVMVFIRSVFRALRESERARVLRLFPYLQVWHDLSMSQATPYKNNGNSVCESLRRIRQCSMSGGYAQSKQVTENVDCKCNAGSIHMAEANRTMLGSRLRNLPKYDSRHPHSTELVLHGRSVRYNTTSVCSQRISMPGRPYPPPVQTCWPSTNMYVMLEKQKPNVLTAAAVISVSVHL…	-|22	-|3.6	-|2	-|1	-|1	-|1	-|1	-	---	-	-	-	-	-	---	-	-	-	-	-	---	-	-	-	-	-	---	-	-	-	-	gi|302784560|ref|XP_002974052.1|	100	0	gi|302784560|ref|XP_002974052.1|	hypothetical protein SELMODRAFT_442274 [Selaginella moellendorffii] >gi|300158384|gb|EFJ25007.1| hypothetical protein SELMODRAFT_442274 [Selaginella moellendorffii]	-	-	-	-	100	0	D8RS58	D8RS58_SELML Putative uncharacterized protein OS=Selaginella moellendorffii GN=SELMODRAFT_442274 PE=4 SV=1	-
412	gi|57157621|dbj|BAD83779.1|	tryptophan synthase beta subunit [Polygonum tinctorium]	60993	MAVSTSSALKSQTSSYSSLSQSRLSAFQFSDSHPKSIRFAQKPLSRCPSISCVMTREDLGAKSLKADAADQEPLLLQRPDSFGRFGKFGGKYVPETLMHALDELETAFHSLATDVEFQKELDGILKDYVGRETPLYFAERLTEHYKRPNGEGPQIYLKREDLNHTGAHKINNAVAQALLAKRLGKTRIIAETGAGQHGVATATVCARFGLECIVYMGAQDMERQSLNVFRMRLLGAEVRGVHSGTATLKDATSEAIRDWVTNVETTHYILGSVAGPHPYPMMVREFHAVIGKETRKQALEKWGGKPDVLVACVGGGSNAMGLFHEFVDDKDVRLIGVEAAGFGLDSGKHAATLTKGEVGVLHGAMSYLLQDDDGQVIEPHSISAGLDYPGVGPEHSFLK…	-|27	-|3.2	-|15	-|2	-|2	-|1	-|1	-	---	-	-	-	-	-	---	-	-	-	-	-	---	-	-	-	-	-	---	-	-	-	-	gi|57157621|dbj|BAD83779.1|	100	0	gi|57157621|dbj|BAD83779.1|	tryptophan synthase beta subunit [Polygonum tinctorium]	90.42	0	sp|P14671|TRPB1_ARATH	Tryptophan synthase beta chain 1, chloroplastic OS=Arabidopsis thaliana GN=TSB1 PE=2 SV=1	100	0	Q5KT13	Q5KT13_9CARY Tryptophan synthase beta subunit OS=Persicaria tinctoria PE=2 SV=1	all3794
413	gi|302794532|ref|XP_002979030.1|	hypothetical protein SELMODRAFT_152929 [Selaginella moellendorffii] >gi|300153348|gb|EFJ19987.1| hypothetical protein SELMODRAFT_152929 [Selaginella moellendorffii]	74678	MSYTRFLEYLDKDKIRKVDLYDNGMVAIVEAVAPELGNRVQRVRVQLPGLPEELIRKIKAKNVDFAAHIPQEDPGNVVLNIISNLAFPVLLLGGLYFLSRRTIGGPGNPNNPFNFGKSKAKFQMEPNTGVTFNDVAGVDEAKQDFMEVVEFLKRPERFTAVGAKIPKGVLLVGPPGTGKTLLAKAIAGEAGVPFFSISGSEFVEVFVGIGASRVRDLFKKAKENAPCIVFVDEIDAVGRQRGTGIGGGNDEREQTLNQLLTEMDGFEGNTGVIVVAATNRADILDAALLRPGRFDRQVSVDVPDVKGRTEILRVHAGNKKFDGDVSLDVIAMRTPGFSGADLANLLNEAAILAGRRGKTAISAKEIDDSIDRIVAGMEGTTMTDGKTKSLVAYHEVGHA…	-|241	-|12.6	-|1	-|11	-|1	-|5	-|1	-	---	-	-	-	-	-	---	-	1	-	-	-	---	-	-	-	-	-	---	-	1	-	-	gi|302794532|ref|XP_002979030.1|	100	0	gi|302794532|ref|XP_002979030.1|	hypothetical protein SELMODRAFT_152929 [Selaginella moellendorffii] >gi|300153348|gb|EFJ19987.1| hypothetical protein SELMODRAFT_152929 [Selaginella moellendorffii]	83.48	0	sp|Q8W585|FTSH8_ARATH	ATP-dependent zinc metalloprotease FTSH 8, chloroplastic OS=Arabidopsis thaliana GN=FTSH8 PE=1 SV=1	100	0	D8S6S4	D8S6S4_SELML Putative uncharacterized protein OS=Selaginella moellendorffii GN=SELMODRAFT_152929 PE=3 SV=1	all3642
414	gi|115438617|ref|NP_001043588.1|	Os01g0618100 [Oryza sativa Japonica Group] >gi|113533119|dbj|BAF05502.1| Os01g0618100 [Oryza sativa Japonica Group]	44622	MAEQAPLAPMPRVKLGTRGLEVSKLGFGCMGLTGAYNSPLDDDAGAAVIAHAFRRGVTFFDTSDVYGPLANEILLGKALKQLPREQVQVATKFGIRRGADGVRAVCGRPEYVRACCEASLGRLGVDYIDLYYQHRVDTTIPIEDTIGELKKLVEEGKVRYIGLSEASPDTIRRAHAVHPITAVQMEWSLWARDIEPEIVPLCRELGIGIVPYSPIARGFFGGRGVTEQLSAESNLQGHPRFSAENLEKNKQLYLKTEELAKKHQCSPAQLALAWVLHQGDDVVPIPGTTKIKNLDANIDSLKVNLTDDDLKEISSQVREEDVAGGRQYTSFAHYTWKYADTPKK	37|-	4.1|-	2|-	1|-	1|-	1|-	1|-	---	-	-	-	-	-	---	-	-	-	-	-	---	-	-	-	-	-	---	-	-	-	-	-	gi|115438617|ref|NP_001043588.1|	100	2e-168	gi|218188670|gb|EEC71097.1|	hypothetical protein OsI_02881 [Oryza sativa Indica Group]	70.18	2e-141	sp|C6TBN2|AKR1_SOYBN	Probable aldo-keto reductase 1 OS=Glycine max GN=AKR1 PE=2 SV=1	100	3e-167	B8ABW6	B8ABW6_ORYSI Putative uncharacterized protein OS=Oryza sativa subsp. indica GN=OsI_02881 PE=4 SV=1	CC3002
415	gi|116794112|gb|ABK27010.1|	unknown [Picea sitchensis]	33237	MLMQSVYVLLIGLCYASIFGIVSSSEAHPGYDSGKCDVGTSASRDQGRILDISHAYREDMPVWDSSEGLGHYLWLAGSMKNGSIANNSEMKMGTHTGTHVDAPGHVFQEYYEAGFDVDTLDLKILNGHALLVDVPRDTNITAKAMEGLNIPRGVHRVLFRTLNTDRHLMWRREFDTSYVGFMKDGAQWLVDNTDIKFVGIDYLSVAAYDDLIPSHLVFLKSKEIILVEGLKLDDIDPGVYSLHCLPLRLLGAEGSPIRCVLMDQILM	54|-	3.4|-	14|-	2|-	2|-	1|-	1|-	1.34	-	2	-	-	-	0.893	-	2	-	-	-	0.844	-	2	-	-	-	0.908	-	2	-	-	-	gi|116794112|gb|ABK27010.1|	100	1e-155	gi|116794112|gb|ABK27010.1|	unknown [Picea sitchensis]	32.24	9e-15	sp|Q81PP9|KYNB_BACAN	Kynurenine formamidase OS=Bacillus anthracis GN=kynB PE=3 SV=1	100	1e-154	A9P299	A9P299_PICSI Putative uncharacterized protein OS=Picea sitchensis PE=2 SV=1	slr2121
416	gi|108707911|gb|ABF95706.1|	Pyruvate kinase, cytosolic isozyme, putative [Oryza sativa Japonica Group]	57529	MAAAVRPTVKGSCSSGGHAGAGRGAGWAPRRRDRRRGGPRRGRSTRASSRRGRRRPRSGYQSRVSRAEQVGPEIRTGFLKDGKPIQLKQGKEITITIDYSIKGDENLISMSYHKLAIDLKPGSTILCADGTITLTVLSCDCEQGLVRCRCENSAMLGERKNVNLPGVIVDLPTLTEKDKVDILQWGVPNKIDMIALSFVRKGSDLMLVRSVLGEHAKSILLMSKVENQEGVANVDEIIANSDAFMVARGDLGMEIPIEKIFYAQKVMIHKCNIHGKPVVTATQMLESMIKSPCPTRAEATDVANAVLDGTDCVMFSGETAAGAYPELAVQTMANICSRAELYLDYPFIFKKLSSEAPVPLSPLESLASSAVQTANISKASLILVLTRGGTTARLIAKYR…	-|52	-|4.7	-|34	-|3	-|1	-|2	-|1	-	---	-	-	-	-	-	---	-	-	-	-	-	---	-	-	-	-	-	---	-	-	-	-	gi|108707911|gb|ABF95706.1|	100	0	gi|108707911|gb|ABF95706.1|	Pyruvate kinase, cytosolic isozyme, putative [Oryza sativa Japonica Group]	80.89	7e-160	sp|Q42954|KPYC_TOBAC	Pyruvate kinase, cytosolic isozyme OS=Nicotiana tabacum PE=2 SV=1	100	0	Q10M32	Q10M32_ORYSJ Pyruvate kinase OS=Oryza sativa subsp. japonica GN=LOC_Os03g20880 PE=3 SV=1	BS_pykA_1
417	gi|302756923|ref|XP_002961885.1|	hypothetical protein SELMODRAFT_69660 [Selaginella moellendorffii] >gi|302817145|ref|XP_002990249.1| hypothetical protein SELMODRAFT_49680 [Selaginella moellendorffii] >gi|300141958|gb|EFJ08664.1| hypothetical protein SELMODRAFT_49680 [Selaginella m	9598	GGDGGSSSKEKRKFITKEEEPEEYWQSAAEREGRGPMSTLLPYIVIFGFSTPFVILALGFANGWIKIPVR	27|-	20.0|-	-|-	1|-	1|-	1|-	1|-	---	-	-	-	-	-	---	-	-	-	-	-	---	-	-	-	-	-	---	-	-	-	-	-	gi|302756923|ref|XP_002961885.1|	100	3e-33	gi|302756923|ref|XP_002961885.1|	hypothetical protein SELMODRAFT_69660 [Selaginella moellendorffii] >gi|302817145|ref|XP_002990249.1| hypothetical protein SELMODRAFT_49680 [Selaginella moellendorffii] >gi|300141958|gb|EFJ08664.1| hypothetical protein SELMODRAFT_49680 [Selaginella moellendorffii] >gi|300170544|gb|EFJ37145.1| hypothetical protein SELMODRAFT_69660 [Selaginella moellendorffii]	-	-	-	-	100	4e-32	D8QTN9	D8QTN9_SELML Putative uncharacterized protein (Fragment) OS=Selaginella moellendorffii GN=SELMODRAFT_49680 PE=4 SV=1	-
418	gi|356499661|ref|XP_003518655.1|	PREDICTED: 2-oxoglutarate dehydrogenase, mitochondrial-like [Glycine max]	132044	MAWFRAGTSIAKHAIRRTLSKGGSTYLVSRARFLPSIPSSSSSPYSRSFHSTVFKEQAAPVPRAVPLSKLTDSFLDGTSSVYLEELQRAWEADPNSVDESWDNFFRNFVGQATTSPGISGQTIQESMRLLLLVRAYQVNGHMKAKLDPLNLEPRQISEDLDPALYGFTEADLDREFFLGVWRMAGFLSENRPVQTLRSILTRLEQAYCGSIGYEYMHIADRHKCNWLRDKIETPTPTQFNRERREAIFDRLAWSSLFENFLATKWTSAKRFGLEGGETLIPGMKEMFDRASDLGVESIVIGMAHRGRLNVLGNVVRKPLRQIFCEFSGGLQPEGEVGLYTGTGDVKYHLGTSYDRPTRGGKRIHLSLVANPSHLEAVNPLVIGKTRAKQYYANDVDRTK…	-|264	-|3.4	-|2	-|6	-|6	-|2	-|2	-	0	-	3	-	-	-	---	-	-	-	-	-	200.817	-	2	-	-	-	---	-	-	-	-	gi|356499661|ref|XP_003518655.1|	100	0	gi|356499661|ref|XP_003518655.1|	PREDICTED: 2-oxoglutarate dehydrogenase, mitochondrial-like [Glycine max]	52.73	0	sp|Q54JE4|ODO1_DICDI	2-oxoglutarate dehydrogenase, mitochondrial OS=Dictyostelium discoideum GN=ogdh PE=3 SV=1	100	0	I1JDR2	I1JDR2_SOYBN Uncharacterized protein OS=Glycine max GN=Gma.18034 PE=4 SV=1	SPBC3H7.03c
419	gi|32967699|gb|AAP92453.1|	S-adenosyl-L-homocystein hydrolase [Arabidopsis thaliana]	64728	MALIVEKTSGGREYKVKDMSQADFGRLELELAEVEMPGLMACRTEFGPAQPFKGARITGSLHMTIQTAVLIETLTALGAEVRWCSCNIFSTQDHAAAAIARDSAAVFAWKGETLQEYWWCTERALDWGPGGGPDLIVDDGGDATLLIHEGVKAEEIFEKTGQVPDPTSTDNPEFQIVLSIIKEGLQVDPKKYHKMKGRLVGVSEETTTGVKRLYQMQESGALLFPAINVNDSVTKSKFDNLYGCRHSLPDGLMRATDVMIAGKVAVICGYGDVGKGCAAAMKTAGARVIVTEIDPICALQAMMEGLQVLTLEDVVSEADIFVTTTGNKDIIMVDHMRKMKNNAIVCNIGHFDNEIDMQGLETFPGVKRITIKPQTDRWVFPDTKSGIIVLAEGRLMNLG…	-|82	-|11.1	-|1	-|6	-|1	-|4	-|1	-	---	-	-	-	-	-	---	-	-	-	-	-	---	-	-	-	-	-	---	-	-	-	-	gi|32967699|gb|AAP92453.1|	100	4e-11	gi|298205241|emb|CBI17300.3|	unnamed protein product [Vitis vinifera]	96.7	0	sp|O23255|SAHH1_ARATH	Adenosylhomocysteinase 1 OS=Arabidopsis thaliana GN=SAHH1 PE=1 SV=1	100	0	A7XB43	A7XB43_ARATH Adenosylhomocysteinase OS=Arabidopsis thaliana PE=2 SV=1	CC0257
420	gi|302796761|ref|XP_002980142.1|	hypothetical protein SELMODRAFT_419711 [Selaginella moellendorffii] >gi|300152369|gb|EFJ19012.1| hypothetical protein SELMODRAFT_419711 [Selaginella moellendorffii]	66557	MEAVIVEPPQDATARIVCLPELGRVQERVVLIFHAAYPDVRDVHLYSVHLELLKLRRSRLMDHIRASLELSTFGTPRALELAFTKMNEELRALVGSSDCRDWCAQNRSLVVVLGDAHVYVFGQALALVILCRSGKDEKLTRPSSLYRLKNASPPQSSSLPFYYHKERLTTADTYLIVASRHLNYHMDSDFTSVFTTRIDALGLEEACRQIADVGSDDCRTFAVVPVGELLRQKVANGVTQEVSGQLHSAAEDIEENPVDINPEPADESESEDEDVPEDPDESEDEQATELYDVRPDGFLPLVNGNPQVPEPFTSCKPGPLRDPCIRVMDLKEKDLKLVCKVGSCKFVIKNGDIKEWFVDGKNDAIVVPVGGQIHRGGLPAPKIIVIQGPKYYKDRDMEA…	20|-	2.9|-	1|-	1|-	1|-	1|-	1|-	---	-	-	-	-	-	---	-	-	-	-	-	---	-	-	-	-	-	---	-	-	-	-	-	gi|302796761|ref|XP_002980142.1|	100	0	gi|302796761|ref|XP_002980142.1|	hypothetical protein SELMODRAFT_419711 [Selaginella moellendorffii] >gi|300152369|gb|EFJ19012.1| hypothetical protein SELMODRAFT_419711 [Selaginella moellendorffii]	38.3	2e-06	sp|D5CE05|YMDB_ENTCC	O-acetyl-ADP-ribose deacetylase OS=Enterobacter cloacae subsp. cloacae (strain ATCC 13047 / DSM 30054 / NBRC 13535 / NCDC 279-56) GN=ymdB PE=3 SV=1	100	0	D8S9T5	D8S9T5_SELML Putative uncharacterized protein OS=Selaginella moellendorffii GN=SELMODRAFT_419711 PE=4 SV=1	PA3693
421	gi|2493046|sp|Q40089.1|ATP4_IPOBA	RecName: Full=ATP synthase subunit delta~, mitochondrial; AltName: Full=F-ATPase delta~ subunit; Flags: Precursor >gi|217938|dbj|BAA01511.1| mitochondrial F1-ATPase delta subunit [Ipomoea batatas]	24651	MFRHSSRLLARATTMGWRRPFSTDLPAETAADSTFVEAWKKLIPNVDPPKTPSAYMAPRPATPSSIPSKLTVNFVLPYSSELAGKEVDMVIIPATTGQMGVLPGHVATIAELKPGVMSVHEGNDVSKYFVSGGFAFIHANSFADIIAVEAVPLDRIDANLVQKGLAEFTQKLNTASTDVEKAEAQIGVDVHSALNAALTG	201|198	9.5|9.5	11|11	3|6	3|6	1|1	1|1	0.885	0.795	2	4	-	-	1.28	1.221	2	4	-	-	1.169	1.015	2	4	-	-	1.191	0.979	2	4	-	-	gi|2493046|sp|Q40089.1|ATP4_IPOBA	100	3e-113	gi|2493046|sp|Q40089.1|ATP4_IPOBA	RecName: Full=ATP synthase subunit delta', mitochondrial; AltName: Full=F-ATPase delta' subunit; Flags: Precursor >gi|217938|dbj|BAA01511.1| mitochondrial F1-ATPase delta subunit [Ipomoea batatas]	100	1e-113	sp|Q40089|ATP4_IPOBA	ATP synthase subunit delta', mitochondrial OS=Ipomoea batatas PE=1 SV=1	89.47	4e-32	Q9LUW8	Q9LUW8_PYRPY F1-ATPase (Fragment) OS=Pyrus pyrifolia GN=PPFRU36 PE=2 SV=1	YDL004w
422	gi|397630062|gb|EJK69622.1|	hypothetical protein THAOC_09101, partial [Thalassiosira oceanica]	50239	MGDEGGVVPTGVVGPSPRPLWVLLACWSACVLPQCLAWSPRTPSETLSRGGRFMSYRADILLSRNWNPLRSLKSRKKIWSMPEAGAKAKIPVFCYIGILTLKQEGEDSVQEPPKGYSRGREEENVDVSNAAEEPYLQPLKPTNSTQFQQELKEEGQTPTFMPECQAAQTQKSQHGAKVCPSFLPTKACNRTVAHKEGEARQLKTNPFPTQSYPTERPFLRIMTLYRDEATTLHWKPFLYVGSKREDLQSMLEIFLGRKIEQQKIRFVVEPLLLARSLNWSSQAVCWCLVARVHHSQRTSATYARSSAGPRIHYLDAPKTQPTSARLQRQQAGRGRLKPAVRQNRVTTALGAICNPNSTVLMILWIIHGRRKSYAMNELFTI	21|-	3.7|-	-|-	1|-	1|-	1|-	1|-	---	-	-	-	-	-	---	-	-	-	-	-	---	-	-	-	-	-	---	-	-	-	-	-	gi|397630062|gb|EJK69622.1|	100	0	gi|397630062|gb|EJK69622.1|	hypothetical protein THAOC_09101, partial [Thalassiosira oceanica]	-	-	-	-	-	-	-	-	-
423	gi|40287496|gb|AAR83862.1|	elicitor-inducible protein EIG-J7 [Capsicum annuum]	23105	MGVAQVNHIWFYLMIILFSISISSIAASEDDCVYTAYIRTGAIIKAGTDSNISLTLYDADGYGLRIKNIEAWGGLMGPGYNYFERGNLDIFSGRGPCLAGPICKMNLTSDGTGPHHGWYCNYVEVTVTGAHKQCIQQLFNVEQWLGTDVSPYKLTAIRNNCNKPKSSEEQPIYDSESYTTVDVI	-|49	-|14.7	-|-	-|4	-|4	-|2	-|2	-	---	-	-	-	-	-	---	-	-	-	-	-	---	-	-	-	-	-	---	-	-	-	-	gi|40287496|gb|AAR83862.1|	100	3e-96	gi|40287496|gb|AAR83862.1|	elicitor-inducible protein EIG-J7 [Capsicum annuum]	31.91	2e-06	sp|C8YR32|LOXH1_MOUSE	Lipoxygenase homology domain-containing protein 1 OS=Mus musculus GN=Loxhd1 PE=2 SV=1	100	3e-95	Q6RJY7	Q6RJY7_CAPAN Elicitor-inducible protein EIG-J7 OS=Capsicum annuum PE=2 SV=1	-
424	gi|115466820|ref|NP_001057009.1|	Os06g0186400 [Oryza sativa Japonica Group] >gi|113595049|dbj|BAF18923.1| Os06g0186400 [Oryza sativa Japonica Group]	59900	MTTTTTTSAIGSLLVLLLVVVVGGVCSASVGGGGGGGEAWRAEQERDRVARVPGQDFDVGFAQYAGYVAVSEERGASLFYWFFEAADDPASKPLVLWLNGGPGCSSIAYGVAEEVGPFHVNADGQGVHLNPYSWNQVANILFLDSPVGVGYSYSNASDDILNNGDARTANDSLTFLTKWIERFPQYKGREFYVTGESYAGHYVPQLAQAIKRHHEATGDKSINLKGYMAGNALFDDFHDHLGIFQFMWTNGLISDQTYRLLNVFCDYESFVHTSSQCNKILDIASDEAGNIDSYSIFTPTCHASFASSRNKVMKRLHSVGKMGERYDPCTEKHSTVYFNLAEVQKALHVSPIINKSKWETCSDVVNTNWKDCERSVLHIYHELIQYGLRIWVFSGDTDA…	-|29	-|3.7	-|-	-|1	-|1	-|1	-|1	-	---	-	-	-	-	-	---	-	-	-	-	-	---	-	-	-	-	-	---	-	-	-	-	gi|115466820|ref|NP_001057009.1|	100	0	gi|115466820|ref|NP_001057009.1|	Os06g0186400 [Oryza sativa Japonica Group] >gi|113595049|dbj|BAF18923.1| Os06g0186400 [Oryza sativa Japonica Group]	86.93	0	sp|P55748|CBP22_HORVU	Serine carboxypeptidase II-2 (Fragment) OS=Hordeum vulgare GN=CXP;2-2 PE=1 SV=1	100	0	Q5SMV5	Q5SMV5_ORYSJ Os06g0186400 protein OS=Oryza sativa subsp. japonica GN=P0470C02.1 PE=2 SV=1	SPAC19G12.10c_2
[truncated: 2,545 more rows]
[truncated: 10 more columns]
