# Supplementary material for: Comparative Proteomic Analysis of Paulownia fortunei Response to Phytoplasma Infection with Dimethyl Sulfate Treatment
Source: Int J Genomics. 2017 Sep 5;2017:6542075. doi: 10.1155/2017/6542075 (PMC5605944; doi:10.1155/2017/6542075)
Supplement: Supplementary file 8 [file 6542075.f8.xlsx]

## Sheet: Sheet1
Supplementary Table 2 KEGG annotation of the DAPs in PF vs. PFI
#	Pathway	Diff Proteins with pathway annotation (91)	All Proteins with pathway annotation (2324)	Pvalue	Pathway ID
1	Photosynthesis	22 (24.18%)	212 (9.12%)	1.09303e-05	ko00195
2	Photosynthesis - antenna proteins	6 (6.59%)	36 (1.55%)	0.00230236	ko00196
3	Ribosome	11 (12.09%)	148 (6.37%)	0.0271897	ko03010
4	Flavonoid biosynthesis	2 (2.2%)	11 (0.47%)	0.0662857	ko00941
5	Vitamin B6 metabolism	2 (2.2%)	17 (0.73%)	0.14111	ko00750
6	Phosphatidylinositol signaling system	1 (1.1%)	6 (0.26%)	0.213314	ko04070
7	Inositol phosphate metabolism	1 (1.1%)	7 (0.3%)	0.244198	ko00562
8	Peroxisome	3 (3.3%)	44 (1.89%)	0.246483	ko04146
9	Glyoxylate and dicarboxylate metabolism	7 (7.69%)	132 (5.68%)	0.256336	ko00630
10	Propanoate metabolism	2 (2.2%)	28 (1.2%)	0.300441	ko00640
11	Carbon fixation in photosynthetic organisms	9 (9.89%)	188 (8.09%)	0.313219	ko00710
12	Sulfur metabolism	1 (1.1%)	10 (0.43%)	0.329834	ko00920
13	Tryptophan metabolism	1 (1.1%)	11 (0.47%)	0.356189	ko00380
14	Endocytosis	2 (2.2%)	32 (1.38%)	0.35877	ko04144
15	Nitrogen metabolism	2 (2.2%)	32 (1.38%)	0.35877	ko00910
16	Phagosome	2 (2.2%)	37 (1.59%)	0.429078	ko04145
17	Spliceosome	3 (3.3%)	61 (2.62%)	0.430557	ko03040
18	Fructose and mannose metabolism	2 (2.2%)	51 (2.19%)	0.601515	ko00051
19	Ascorbate and aldarate metabolism	2 (2.2%)	51 (2.19%)	0.601515	ko00053
20	Metabolic pathways	41 (45.05%)	1069 (46%)	0.613643	ko01100
21	Pyrimidine metabolism	1 (1.1%)	24 (1.03%)	0.618455	ko00240
22	Oxidative phosphorylation	5 (5.49%)	135 (5.81%)	0.618724	ko00190
23	Pentose and glucuronate interconversions	1 (1.1%)	26 (1.12%)	0.648056	ko00040
24	Plant-pathogen interaction	2 (2.2%)	56 (2.41%)	0.652992	ko04626
25	Ribosome biogenesis in eukaryotes	1 (1.1%)	28 (1.2%)	0.675383	ko03008
26	RNA degradation	2 (2.2%)	59 (2.54%)	0.681296	ko03018
27	Galactose metabolism	1 (1.1%)	29 (1.25%)	0.688249	ko00052
28	Glycolysis / Gluconeogenesis	4 (4.4%)	134 (5.77%)	0.781968	ko00010
29	Cysteine and methionine metabolism	1 (1.1%)	38 (1.64%)	0.783536	ko00270
30	Pyruvate metabolism	3 (3.3%)	104 (4.48%)	0.784727	ko00620
31	Phenylpropanoid biosynthesis	1 (1.1%)	44 (1.89%)	0.830403	ko00940
32	mRNA surveillance pathway	1 (1.1%)	48 (2.07%)	0.855917	ko03015
33	Purine metabolism	1 (1.1%)	49 (2.11%)	0.861678	ko00230
34	Pentose phosphate pathway	1 (1.1%)	49 (2.11%)	0.861678	ko00030
35	Starch and sucrose metabolism	1 (1.1%)	60 (2.58%)	0.911806	ko00500
36	Amino sugar and nucleotide sugar metabolism	1 (1.1%)	61 (2.62%)	0.915351	ko00520
37	Biosynthesis of secondary metabolites	15 (16.48%)	505 (21.73%)	0.917943	ko01110
38	Citrate cycle (TCA cycle)	1 (1.1%)	69 (2.97%)	0.939075	ko00020
39	Protein processing in endoplasmic reticulum	1 (1.1%)	74 (3.18%)	0.950424	ko04141
