# Supplementary material for: Comparative Proteomic Analysis of Paulownia fortunei Response to Phytoplasma Infection with Dimethyl Sulfate Treatment
Source: Int J Genomics. 2017 Sep 5;2017:6542075. doi: 10.1155/2017/6542075 (PMC5605944; doi:10.1155/2017/6542075)
Supplement: Supplementary file 9 [file 6542075.f9.xlsx]

## Sheet: biological process
Supplementary table 3 GO analyses of the DAPs in PF vs.PFI
Gene Ontology term	Cluster frequency	Protein frequency of use	P-value
photosynthesis	31 out of 94 genes, 33.0%	403 out of 2403 genes, 16.8%	6.59801e-05
photosynthesis, light reaction	22 out of 94 genes, 23.4%	267 out of 2403 genes, 11.1%	0.00040244
photosynthesis, light harvesting	7 out of 94 genes, 7.4%	47 out of 2403 genes, 2.0%	0.00195445
cellular process	89 out of 94 genes, 94.7%	2033 out of 2403 genes, 84.6%	0.00196106
response to red light	9 out of 94 genes, 9.6%	78 out of 2403 genes, 3.2%	0.00284635
macromolecular complex assembly	18 out of 94 genes, 19.1%	234 out of 2403 genes, 9.7%	0.00328275
response to far red light	9 out of 94 genes, 9.6%	80 out of 2403 genes, 3.3%	0.00339249
macromolecular complex subunit organization	19 out of 94 genes, 20.2%	256 out of 2403 genes, 10.7%	0.00375917
photosystem II assembly	11 out of 94 genes, 11.7%	116 out of 2403 genes, 4.8%	0.00473408
response to blue light	9 out of 94 genes, 9.6%	86 out of 2403 genes, 3.6%	0.00553989
generation of precursor metabolites and energy	30 out of 94 genes, 31.9%	502 out of 2403 genes, 20.9%	0.00711256
cellular component assembly	19 out of 94 genes, 20.2%	272 out of 2403 genes, 11.3%	0.0073686
nucleosome assembly	3 out of 94 genes, 3.2%	12 out of 2403 genes, 0.5%	0.00986501
nucleosome organization	3 out of 94 genes, 3.2%	12 out of 2403 genes, 0.5%	0.00986501
protein-DNA complex assembly	3 out of 94 genes, 3.2%	12 out of 2403 genes, 0.5%	0.00986501
protein-DNA complex subunit organization	3 out of 94 genes, 3.2%	12 out of 2403 genes, 0.5%	0.00986501
cellular macromolecular complex assembly	16 out of 94 genes, 17.0%	225 out of 2403 genes, 9.4%	0.0119939
chromatin assembly	3 out of 94 genes, 3.2%	13 out of 2403 genes, 0.5%	0.0124653
cellular ion homeostasis	6 out of 94 genes, 6.4%	51 out of 2403 genes, 2.1%	0.0132552
cellular cation homeostasis	6 out of 94 genes, 6.4%	51 out of 2403 genes, 2.1%	0.0132552
DNA packaging	3 out of 94 genes, 3.2%	15 out of 2403 genes, 0.6%	0.0187389
cellular chemical homeostasis	6 out of 94 genes, 6.4%	55 out of 2403 genes, 2.3%	0.0188257
cellular metabolic process	80 out of 94 genes, 85.1%	1825 out of 2403 genes, 75.9%	0.0192162
ribosome biogenesis	12 out of 94 genes, 12.8%	160 out of 2403 genes, 6.7%	0.0199392
response to red or far red light	9 out of 94 genes, 9.6%	106 out of 2403 genes, 4.4%	0.0207408
ribonucleoprotein complex biogenesis	12 out of 94 genes, 12.8%	162 out of 2403 genes, 6.7%	0.0217998
chromatin assembly or disassembly	3 out of 94 genes, 3.2%	16 out of 2403 genes, 0.7%	0.0224208
gene expression	24 out of 94 genes, 25.5%	411 out of 2403 genes, 17.1%	0.0228085
ion transport	14 out of 94 genes, 14.9%	203 out of 2403 genes, 8.4%	0.0238644
cation homeostasis	6 out of 94 genes, 6.4%	58 out of 2403 genes, 2.4%	0.0239333
serine family amino acid metabolic process	11 out of 94 genes, 11.7%	146 out of 2403 genes, 6.1%	0.0248223
ion homeostasis	6 out of 94 genes, 6.4%	60 out of 2403 genes, 2.5%	0.0278132
nucleobase-containing compound metabolic process	34 out of 94 genes, 36.2%	648 out of 2403 genes, 27.0%	0.0290699
sulfur amino acid biosynthetic process	10 out of 94 genes, 10.6%	131 out of 2403 genes, 5.5%	0.0294745
cellular homeostasis	9 out of 94 genes, 9.6%	113 out of 2403 genes, 4.7%	0.0301005
cellular component biogenesis	21 out of 94 genes, 22.3%	359 out of 2403 genes, 14.9%	0.0329979
cysteine metabolic process	9 out of 94 genes, 9.6%	115 out of 2403 genes, 4.8%	0.0332476
cysteine biosynthetic process	9 out of 94 genes, 9.6%	115 out of 2403 genes, 4.8%	0.0332476
RNA splicing	3 out of 94 genes, 3.2%	19 out of 2403 genes, 0.8%	0.0356549
glycine decarboxylation via glycine cleavage system	2 out of 94 genes, 2.1%	8 out of 2403 genes, 0.3%	0.0363517
protein homooligomerization	2 out of 94 genes, 2.1%	8 out of 2403 genes, 0.3%	0.0363517
plastid organization	14 out of 94 genes, 14.9%	215 out of 2403 genes, 8.9%	0.0369672
chemical homeostasis	6 out of 94 genes, 6.4%	65 out of 2403 genes, 2.7%	0.0392779
divalent metal ion transport	6 out of 94 genes, 6.4%	65 out of 2403 genes, 2.7%	0.0392779
divalent inorganic cation transport	6 out of 94 genes, 6.4%	65 out of 2403 genes, 2.7%	0.0392779
protein complex assembly	14 out of 94 genes, 14.9%	217 out of 2403 genes, 9.0%	0.0395795
protein complex biogenesis	14 out of 94 genes, 14.9%	217 out of 2403 genes, 9.0%	0.0395795
RNA processing	13 out of 94 genes, 13.8%	197 out of 2403 genes, 8.2%	0.0400454
protein complex subunit organization	15 out of 94 genes, 16.0%	239 out of 2403 genes, 9.9%	0.0414033
regulation of biological quality	13 out of 94 genes, 13.8%	199 out of 2403 genes, 8.3%	0.042957
metal ion transport	7 out of 94 genes, 7.4%	84 out of 2403 genes, 3.5%	0.0434704
protein oligomerization	2 out of 94 genes, 2.1%	9 out of 2403 genes, 0.4%	0.0455656
response to high light intensity	7 out of 94 genes, 7.4%	85 out of 2403 genes, 3.5%	0.045904
DNA conformation change	3 out of 94 genes, 3.2%	21 out of 2403 genes, 0.9%	0.0462721
cation transport	12 out of 94 genes, 12.8%	182 out of 2403 genes, 7.6%	0.0481468
sulfur amino acid metabolic process	10 out of 94 genes, 10.6%	145 out of 2403 genes, 6.0%	0.0536025
response to light intensity	7 out of 94 genes, 7.4%	88 out of 2403 genes, 3.7%	0.0537268
rRNA processing	10 out of 94 genes, 10.6%	146 out of 2403 genes, 6.1%	0.0557186
rRNA metabolic process	10 out of 94 genes, 10.6%	146 out of 2403 genes, 6.1%	0.0557186
serine family amino acid biosynthetic process	9 out of 94 genes, 9.6%	129 out of 2403 genes, 5.4%	0.0618454
homeostatic process	9 out of 94 genes, 9.6%	129 out of 2403 genes, 5.4%	0.0618454
response to cold	13 out of 94 genes, 13.8%	211 out of 2403 genes, 8.8%	0.0636339
nitrogen compound metabolic process	42 out of 94 genes, 44.7%	882 out of 2403 genes, 36.7%	0.064519
photosynthetic electron transport chain	7 out of 94 genes, 7.4%	92 out of 2403 genes, 3.8%	0.0653979
nucleic acid metabolic process	20 out of 94 genes, 21.3%	364 out of 2403 genes, 15.1%	0.0656921
ncRNA processing	10 out of 94 genes, 10.6%	151 out of 2403 genes, 6.3%	0.0671335
translational elongation	4 out of 94 genes, 4.3%	40 out of 2403 genes, 1.7%	0.0685549
unsaturated fatty acid biosynthetic process	4 out of 94 genes, 4.3%	41 out of 2403 genes, 1.7%	0.0737798
response to chitin	4 out of 94 genes, 4.3%	41 out of 2403 genes, 1.7%	0.0737798
unsaturated fatty acid metabolic process	4 out of 94 genes, 4.3%	41 out of 2403 genes, 1.7%	0.0737798
photoinhibition	3 out of 94 genes, 3.2%	26 out of 2403 genes, 1.1%	0.0787127
negative regulation of photosynthesis, light reaction	3 out of 94 genes, 3.2%	26 out of 2403 genes, 1.1%	0.0787127
protein peptidyl-prolyl isomerization	4 out of 94 genes, 4.3%	43 out of 2403 genes, 1.8%	0.0848197
heterocycle metabolic process	35 out of 94 genes, 37.2%	729 out of 2403 genes, 30.3%	0.0870507
regulation of cellular component size	2 out of 94 genes, 2.1%	13 out of 2403 genes, 0.5%	0.0892599
regulation of anatomical structure size	2 out of 94 genes, 2.1%	13 out of 2403 genes, 0.5%	0.0892599
response to organic nitrogen	4 out of 94 genes, 4.3%	44 out of 2403 genes, 1.8%	0.0906279
peptidyl-proline modification	4 out of 94 genes, 4.3%	44 out of 2403 genes, 1.8%	0.0906279
energy coupled proton transmembrane transport, against electrochemical gradient	5 out of 94 genes, 5.3%	63 out of 2403 genes, 2.6%	0.097363
ATP hydrolysis coupled proton transport	5 out of 94 genes, 5.3%	63 out of 2403 genes, 2.6%	0.097363
regulation of photosynthesis, light reaction	3 out of 94 genes, 3.2%	29 out of 2403 genes, 1.2%	0.101836
regulation of generation of precursor metabolites and energy	3 out of 94 genes, 3.2%	29 out of 2403 genes, 1.2%	0.101836
protein folding	9 out of 94 genes, 9.6%	143 out of 2403 genes, 6.0%	0.102905
cellular protein complex assembly	12 out of 94 genes, 12.8%	208 out of 2403 genes, 8.7%	0.107727
photosynthetic electron transport in photosystem II	3 out of 94 genes, 3.2%	30 out of 2403 genes, 1.2%	0.110085
pollination	3 out of 94 genes, 3.2%	30 out of 2403 genes, 1.2%	0.110085
multi-multicellular organism process	3 out of 94 genes, 3.2%	30 out of 2403 genes, 1.2%	0.110085
RNA metabolic process	16 out of 94 genes, 17.0%	297 out of 2403 genes, 12.4%	0.110108
regulation of dephosphorylation	6 out of 94 genes, 6.4%	85 out of 2403 genes, 3.5%	0.112286
regulation of protein dephosphorylation	6 out of 94 genes, 6.4%	85 out of 2403 genes, 3.5%	0.112286
amino acid transport	2 out of 94 genes, 2.1%	15 out of 2403 genes, 0.6%	0.114309
cellular nitrogen compound metabolic process	35 out of 94 genes, 37.2%	747 out of 2403 genes, 31.1%	0.116001
glycine catabolic process	3 out of 94 genes, 3.2%	31 out of 2403 genes, 1.3%	0.118585
serine family amino acid catabolic process	3 out of 94 genes, 3.2%	31 out of 2403 genes, 1.3%	0.118585
regulation of photosynthesis	3 out of 94 genes, 3.2%	31 out of 2403 genes, 1.3%	0.118585
organelle organization	22 out of 94 genes, 23.4%	438 out of 2403 genes, 18.2%	0.118734
photosynthetic electron transport in photosystem I	4 out of 94 genes, 4.3%	49 out of 2403 genes, 2.0%	0.12239
response to light stimulus	14 out of 94 genes, 14.9%	258 out of 2403 genes, 10.7%	0.125348
malate metabolic process	3 out of 94 genes, 3.2%	32 out of 2403 genes, 1.3%	0.127323
sulfur compound biosynthetic process	11 out of 94 genes, 11.7%	193 out of 2403 genes, 8.0%	0.128605
peptidyl-amino acid modification	4 out of 94 genes, 4.3%	50 out of 2403 genes, 2.1%	0.129255
regulation of protein modification process	6 out of 94 genes, 6.4%	90 out of 2403 genes, 3.7%	0.137245
alpha-amino acid metabolic process	13 out of 94 genes, 13.8%	241 out of 2403 genes, 10.0%	0.141607
cellular aromatic compound metabolic process	35 out of 94 genes, 37.2%	761 out of 2403 genes, 31.7%	0.142582
response to radiation	14 out of 94 genes, 14.9%	264 out of 2403 genes, 11.0%	0.143416
gynoecium development	4 out of 94 genes, 4.3%	52 out of 2403 genes, 2.2%	0.143455
negative regulation of biological process	8 out of 94 genes, 8.5%	133 out of 2403 genes, 5.5%	0.145338
detection of biotic stimulus	3 out of 94 genes, 3.2%	34 out of 2403 genes, 1.4%	0.145459
translation	12 out of 94 genes, 12.8%	222 out of 2403 genes, 9.2%	0.15283
organic anion transport	2 out of 94 genes, 2.1%	18 out of 2403 genes, 0.7%	0.15465
organic acid transport	2 out of 94 genes, 2.1%	18 out of 2403 genes, 0.7%	0.15465
carboxylic acid transport	2 out of 94 genes, 2.1%	18 out of 2403 genes, 0.7%	0.15465
purine nucleoside triphosphate metabolic process	9 out of 94 genes, 9.6%	158 out of 2403 genes, 6.6%	0.160919
ribonucleoside triphosphate metabolic process	9 out of 94 genes, 9.6%	158 out of 2403 genes, 6.6%	0.160919
purine ribonucleoside triphosphate metabolic process	9 out of 94 genes, 9.6%	158 out of 2403 genes, 6.6%	0.160919
electron transport chain	8 out of 94 genes, 8.5%	137 out of 2403 genes, 5.7%	0.163594
RNA methylation	3 out of 94 genes, 3.2%	36 out of 2403 genes, 1.5%	0.164391
regulation of response to biotic stimulus	3 out of 94 genes, 3.2%	36 out of 2403 genes, 1.5%	0.164391
glycine metabolic process	3 out of 94 genes, 3.2%	36 out of 2403 genes, 1.5%	0.164391
regulation of proton transport	3 out of 94 genes, 3.2%	36 out of 2403 genes, 1.5%	0.164391
regulation of hydrogen peroxide metabolic process	3 out of 94 genes, 3.2%	36 out of 2403 genes, 1.5%	0.164391
multi-organism reproductive process	3 out of 94 genes, 3.2%	36 out of 2403 genes, 1.5%	0.164391
single-organism transport	21 out of 94 genes, 22.3%	434 out of 2403 genes, 18.1%	0.166925
response to abiotic stimulus	31 out of 94 genes, 33.0%	675 out of 2403 genes, 28.1%	0.168435
nucleoside triphosphate metabolic process	9 out of 94 genes, 9.6%	160 out of 2403 genes, 6.7%	0.169683
alpha-amino acid catabolic process	4 out of 94 genes, 4.3%	56 out of 2403 genes, 2.3%	0.173582
negative regulation of defense response	3 out of 94 genes, 3.2%	37 out of 2403 genes, 1.5%	0.174123
metabolic process	87 out of 94 genes, 92.6%	2140 out of 2403 genes, 89.1%	0.174562
cellular amino acid catabolic process	4 out of 94 genes, 4.3%	57 out of 2403 genes, 2.4%	0.18144
regulation of phosphate metabolic process	6 out of 94 genes, 6.4%	98 out of 2403 genes, 4.1%	0.182076
regulation of phosphorus metabolic process	6 out of 94 genes, 6.4%	98 out of 2403 genes, 4.1%	0.182076
indoleacetic acid metabolic process	2 out of 94 genes, 2.1%	20 out of 2403 genes, 0.8%	0.182857
indoleacetic acid biosynthetic process	2 out of 94 genes, 2.1%	20 out of 2403 genes, 0.8%	0.182857
cellular response to phosphate starvation	2 out of 94 genes, 2.1%	20 out of 2403 genes, 0.8%	0.182857
regulation of reactive oxygen species metabolic process	3 out of 94 genes, 3.2%	38 out of 2403 genes, 1.6%	0.184016
organic cyclic compound metabolic process	35 out of 94 genes, 37.2%	780 out of 2403 genes, 32.5%	0.184425
response to nitrogen compound	5 out of 94 genes, 5.3%	78 out of 2403 genes, 3.2%	0.187278
RNA modification	4 out of 94 genes, 4.3%	58 out of 2403 genes, 2.4%	0.189416
systemic acquired resistance, salicylic acid mediated signaling pathway	3 out of 94 genes, 3.2%	39 out of 2403 genes, 1.6%	0.194056
salicylic acid mediated signaling pathway	3 out of 94 genes, 3.2%	39 out of 2403 genes, 1.6%	0.194056
cellular response to salicylic acid stimulus	3 out of 94 genes, 3.2%	39 out of 2403 genes, 1.6%	0.194056
purine nucleotide metabolic process	10 out of 94 genes, 10.6%	188 out of 2403 genes, 7.8%	0.195615
ncRNA metabolic process	10 out of 94 genes, 10.6%	188 out of 2403 genes, 7.8%	0.195615
auxin biosynthetic process	2 out of 94 genes, 2.1%	21 out of 2403 genes, 0.9%	0.197234
cellular response to organic cyclic compound	4 out of 94 genes, 4.3%	59 out of 2403 genes, 2.5%	0.197504
nucleoside triphosphate biosynthetic process	6 out of 94 genes, 6.4%	101 out of 2403 genes, 4.2%	0.200265
purine nucleoside triphosphate biosynthetic process	6 out of 94 genes, 6.4%	101 out of 2403 genes, 4.2%	0.200265
ribonucleoside triphosphate biosynthetic process	6 out of 94 genes, 6.4%	101 out of 2403 genes, 4.2%	0.200265
purine ribonucleoside triphosphate biosynthetic process	6 out of 94 genes, 6.4%	101 out of 2403 genes, 4.2%	0.200265
MAPK cascade	3 out of 94 genes, 3.2%	40 out of 2403 genes, 1.7%	0.204232
negative regulation of response to stimulus	3 out of 94 genes, 3.2%	40 out of 2403 genes, 1.7%	0.204232
nitrogen compound transport	3 out of 94 genes, 3.2%	40 out of 2403 genes, 1.7%	0.204232
gluconeogenesis	6 out of 94 genes, 6.4%	102 out of 2403 genes, 4.2%	0.206477
tube development	2 out of 94 genes, 2.1%	22 out of 2403 genes, 0.9%	0.211747
pollen tube development	2 out of 94 genes, 2.1%	22 out of 2403 genes, 0.9%	0.211747
purine ribonucleotide metabolic process	9 out of 94 genes, 9.6%	169 out of 2403 genes, 7.0%	0.2118
hexose biosynthetic process	6 out of 94 genes, 6.4%	103 out of 2403 genes, 4.3%	0.21276
purine nucleotide biosynthetic process	7 out of 94 genes, 7.4%	125 out of 2403 genes, 5.2%	0.214148
intracellular protein kinase cascade	3 out of 94 genes, 3.2%	41 out of 2403 genes, 1.7%	0.214531
jasmonic acid mediated signaling pathway	3 out of 94 genes, 3.2%	41 out of 2403 genes, 1.7%	0.214531
cellular response to jasmonic acid stimulus	3 out of 94 genes, 3.2%	41 out of 2403 genes, 1.7%	0.214531
single-organism cellular process	44 out of 94 genes, 46.8%	1018 out of 2403 genes, 42.4%	0.21625
ribonucleoside metabolic process	9 out of 94 genes, 9.6%	170 out of 2403 genes, 7.1%	0.216731
purine nucleoside metabolic process	9 out of 94 genes, 9.6%	170 out of 2403 genes, 7.1%	0.216731
purine ribonucleoside metabolic process	9 out of 94 genes, 9.6%	170 out of 2403 genes, 7.1%	0.216731
regulation of cellular metabolic process	12 out of 94 genes, 12.8%	239 out of 2403 genes, 9.9%	0.219065
ion transmembrane transport	6 out of 94 genes, 6.4%	104 out of 2403 genes, 4.3%	0.21911
purine-containing compound metabolic process	10 out of 94 genes, 10.6%	194 out of 2403 genes, 8.1%	0.223152
detection of stimulus	3 out of 94 genes, 3.2%	42 out of 2403 genes, 1.7%	0.224941
regulation of cellular protein metabolic process	6 out of 94 genes, 6.4%	105 out of 2403 genes, 4.4%	0.225526
cellular hormone metabolic process	2 out of 94 genes, 2.1%	23 out of 2403 genes, 1.0%	0.226364
alpha-amino acid biosynthetic process	10 out of 94 genes, 10.6%	195 out of 2403 genes, 8.1%	0.22789
hormone-mediated signaling pathway	4 out of 94 genes, 4.3%	63 out of 2403 genes, 2.6%	0.230857
nucleoside metabolic process	9 out of 94 genes, 9.6%	173 out of 2403 genes, 7.2%	0.231799
monosaccharide biosynthetic process	6 out of 94 genes, 6.4%	106 out of 2403 genes, 4.4%	0.232004
regulation of plant-type hypersensitive response	3 out of 94 genes, 3.2%	43 out of 2403 genes, 1.8%	0.23545
energy coupled proton transport, down electrochemical gradient	5 out of 94 genes, 5.3%	85 out of 2403 genes, 3.5%	0.237032
ATP synthesis coupled proton transport	5 out of 94 genes, 5.3%	85 out of 2403 genes, 3.5%	0.237032
sulfur compound metabolic process	11 out of 94 genes, 11.7%	220 out of 2403 genes, 9.2%	0.237197
purine-containing compound biosynthetic process	7 out of 94 genes, 7.4%	129 out of 2403 genes, 5.4%	0.237564
regulation of protein metabolic process	6 out of 94 genes, 6.4%	107 out of 2403 genes, 4.5%	0.238543
auxin metabolic process	2 out of 94 genes, 2.1%	24 out of 2403 genes, 1.0%	0.241055
transport	22 out of 94 genes, 23.4%	483 out of 2403 genes, 20.1%	0.242906
response to salicylic acid stimulus	3 out of 94 genes, 3.2%	44 out of 2403 genes, 1.8%	0.246047
regulation of multi-organism process	3 out of 94 genes, 3.2%	44 out of 2403 genes, 1.8%	0.246047
regulation of cellular response to stress	3 out of 94 genes, 3.2%	44 out of 2403 genes, 1.8%	0.246047
cellular response to hormone stimulus	4 out of 94 genes, 4.3%	65 out of 2403 genes, 2.7%	0.248047
floral whorl development	4 out of 94 genes, 4.3%	65 out of 2403 genes, 2.7%	0.248047
cellular response to endogenous stimulus	4 out of 94 genes, 4.3%	65 out of 2403 genes, 2.7%	0.248047
cellular component organization	27 out of 94 genes, 28.7%	607 out of 2403 genes, 25.3%	0.249108
purine ribonucleotide biosynthetic process	6 out of 94 genes, 6.4%	109 out of 2403 genes, 4.5%	0.251791
localization	24 out of 94 genes, 25.5%	535 out of 2403 genes, 22.3%	0.25374
ATP metabolic process	6 out of 94 genes, 6.4%	110 out of 2403 genes, 4.6%	0.258495
organonitrogen compound metabolic process	29 out of 94 genes, 30.9%	660 out of 2403 genes, 27.5%	0.260476
glycosyl compound metabolic process	12 out of 94 genes, 12.8%	249 out of 2403 genes, 10.4%	0.263033
glycosyl compound biosynthetic process	9 out of 94 genes, 9.6%	179 out of 2403 genes, 7.4%	0.26307
cellular macromolecule localization	8 out of 94 genes, 8.5%	156 out of 2403 genes, 6.5%	0.263096
nucleoside biosynthetic process	6 out of 94 genes, 6.4%	111 out of 2403 genes, 4.6%	0.265248
purine nucleoside biosynthetic process	6 out of 94 genes, 6.4%	111 out of 2403 genes, 4.6%	0.265248
ribonucleoside biosynthetic process	6 out of 94 genes, 6.4%	111 out of 2403 genes, 4.6%	0.265248
purine ribonucleoside biosynthetic process	6 out of 94 genes, 6.4%	111 out of 2403 genes, 4.6%	0.265248
defense response to bacterium	9 out of 94 genes, 9.6%	180 out of 2403 genes, 7.5%	0.268415
fatty acid biosynthetic process	4 out of 94 genes, 4.3%	68 out of 2403 genes, 2.8%	0.274337
positive regulation of gene expression	4 out of 94 genes, 4.3%	68 out of 2403 genes, 2.8%	0.274337
positive regulation of transcription, DNA-dependent	4 out of 94 genes, 4.3%	68 out of 2403 genes, 2.8%	0.274337
positive regulation of RNA metabolic process	4 out of 94 genes, 4.3%	68 out of 2403 genes, 2.8%	0.274337
protein targeting to membrane	3 out of 94 genes, 3.2%	47 out of 2403 genes, 2.0%	0.278251
fatty acid metabolic process	6 out of 94 genes, 6.4%	113 out of 2403 genes, 4.7%	0.278893
response to organic cyclic compound	4 out of 94 genes, 4.3%	69 out of 2403 genes, 2.9%	0.283211
intracellular signal transduction	4 out of 94 genes, 4.3%	69 out of 2403 genes, 2.9%	0.283211
positive regulation of nucleobase-containing compound metabolic process	4 out of 94 genes, 4.3%	69 out of 2403 genes, 2.9%	0.283211
positive regulation of nitrogen compound metabolic process	4 out of 94 genes, 4.3%	69 out of 2403 genes, 2.9%	0.283211
regulation of ion transport	3 out of 94 genes, 3.2%	48 out of 2403 genes, 2.0%	0.289089
GTP metabolic process	3 out of 94 genes, 3.2%	48 out of 2403 genes, 2.0%	0.289089
guanosine-containing compound metabolic process	3 out of 94 genes, 3.2%	48 out of 2403 genes, 2.0%	0.289089
systemic acquired resistance	4 out of 94 genes, 4.3%	70 out of 2403 genes, 2.9%	0.292131
tetraterpenoid biosynthetic process	4 out of 94 genes, 4.3%	70 out of 2403 genes, 2.9%	0.292131
carotenoid biosynthetic process	4 out of 94 genes, 4.3%	70 out of 2403 genes, 2.9%	0.292131
organic acid catabolic process	5 out of 94 genes, 5.3%	93 out of 2403 genes, 3.9%	0.297818
small molecule catabolic process	5 out of 94 genes, 5.3%	93 out of 2403 genes, 3.9%	0.297818
single-organism catabolic process	5 out of 94 genes, 5.3%	93 out of 2403 genes, 3.9%	0.297818
carboxylic acid catabolic process	5 out of 94 genes, 5.3%	93 out of 2403 genes, 3.9%	0.297818
regulation of immune system process	3 out of 94 genes, 3.2%	49 out of 2403 genes, 2.0%	0.29996
regulation of innate immune response	3 out of 94 genes, 3.2%	49 out of 2403 genes, 2.0%	0.29996
regulation of immune response	3 out of 94 genes, 3.2%	49 out of 2403 genes, 2.0%	0.29996
indole-containing compound biosynthetic process	2 out of 94 genes, 2.1%	28 out of 2403 genes, 1.2%	0.300027
tetraterpenoid metabolic process	4 out of 94 genes, 4.3%	71 out of 2403 genes, 3.0%	0.301091
carotenoid metabolic process	4 out of 94 genes, 4.3%	71 out of 2403 genes, 3.0%	0.301091
response to temperature stimulus	14 out of 94 genes, 14.9%	306 out of 2403 genes, 12.7%	0.304897
ATP biosynthetic process	5 out of 94 genes, 5.3%	94 out of 2403 genes, 3.9%	0.305619
nucleoside phosphate metabolic process	17 out of 94 genes, 18.1%	379 out of 2403 genes, 15.8%	0.306301
nucleotide metabolic process	17 out of 94 genes, 18.1%	379 out of 2403 genes, 15.8%	0.306301
ribonucleotide metabolic process	9 out of 94 genes, 9.6%	187 out of 2403 genes, 7.8%	0.30673
ribose phosphate metabolic process	9 out of 94 genes, 9.6%	187 out of 2403 genes, 7.8%	0.30673
regulation of cell death	3 out of 94 genes, 3.2%	50 out of 2403 genes, 2.1%	0.310856
regulation of programmed cell death	3 out of 94 genes, 3.2%	50 out of 2403 genes, 2.1%	0.310856
hydrogen transport	5 out of 94 genes, 5.3%	95 out of 2403 genes, 4.0%	0.313454
proton transport	5 out of 94 genes, 5.3%	95 out of 2403 genes, 4.0%	0.313454
cellular response to starvation	2 out of 94 genes, 2.1%	29 out of 2403 genes, 1.2%	0.314708
response to nutrient levels	2 out of 94 genes, 2.1%	29 out of 2403 genes, 1.2%	0.314708
cellular response to nutrient levels	2 out of 94 genes, 2.1%	29 out of 2403 genes, 1.2%	0.314708
indole-containing compound metabolic process	2 out of 94 genes, 2.1%	29 out of 2403 genes, 1.2%	0.314708
response to starvation	2 out of 94 genes, 2.1%	29 out of 2403 genes, 1.2%	0.314708
positive regulation of macromolecule biosynthetic process	4 out of 94 genes, 4.3%	73 out of 2403 genes, 3.0%	0.319107
establishment of localization	23 out of 94 genes, 24.5%	530 out of 2403 genes, 22.1%	0.320716
cellular response to organic substance	5 out of 94 genes, 5.3%	96 out of 2403 genes, 4.0%	0.321317
chromatin organization	3 out of 94 genes, 3.2%	51 out of 2403 genes, 2.1%	0.321768
plant-type ovary development	3 out of 94 genes, 3.2%	51 out of 2403 genes, 2.1%	0.321768
carpel development	3 out of 94 genes, 3.2%	51 out of 2403 genes, 2.1%	0.321768
ovule development	3 out of 94 genes, 3.2%	51 out of 2403 genes, 2.1%	0.321768
monocarboxylic acid biosynthetic process	7 out of 94 genes, 7.4%	143 out of 2403 genes, 6.0%	0.325163
regulation of response to stimulus	4 out of 94 genes, 4.3%	74 out of 2403 genes, 3.1%	0.328153
regulation of defense response	3 out of 94 genes, 3.2%	52 out of 2403 genes, 2.2%	0.332685
regulation of response to stress	3 out of 94 genes, 3.2%	52 out of 2403 genes, 2.2%	0.332685
response to bacterium	9 out of 94 genes, 9.6%	192 out of 2403 genes, 8.0%	0.334894
negative regulation of metabolic process	4 out of 94 genes, 4.3%	75 out of 2403 genes, 3.1%	0.337216
positive regulation of macromolecule metabolic process	4 out of 94 genes, 4.3%	75 out of 2403 genes, 3.1%	0.337216
nucleobase-containing small molecule metabolic process	17 out of 94 genes, 18.1%	387 out of 2403 genes, 16.1%	0.339169
salicylic acid metabolic process	3 out of 94 genes, 3.2%	53 out of 2403 genes, 2.2%	0.343599
salicylic acid biosynthetic process	3 out of 94 genes, 3.2%	53 out of 2403 genes, 2.2%	0.343599
regulation of transport	3 out of 94 genes, 3.2%	53 out of 2403 genes, 2.2%	0.343599
anion transport	2 out of 94 genes, 2.1%	31 out of 2403 genes, 1.3%	0.343858
positive regulation of biosynthetic process	4 out of 94 genes, 4.3%	76 out of 2403 genes, 3.2%	0.346293
positive regulation of cellular biosynthetic process	4 out of 94 genes, 4.3%	76 out of 2403 genes, 3.2%	0.346293
regulation of metabolic process	14 out of 94 genes, 14.9%	316 out of 2403 genes, 13.2%	0.350069
cellular component organization or biogenesis	28 out of 94 genes, 29.8%	663 out of 2403 genes, 27.6%	0.35117
microtubule-based process	2 out of 94 genes, 2.1%	32 out of 2403 genes, 1.3%	0.358294
monovalent inorganic cation transport	5 out of 94 genes, 5.3%	101 out of 2403 genes, 4.2%	0.360941
organonitrogen compound biosynthetic process	20 out of 94 genes, 21.3%	467 out of 2403 genes, 19.4%	0.363291
biological regulation	26 out of 94 genes, 27.7%	618 out of 2403 genes, 25.7%	0.368832
intracellular protein transport	7 out of 94 genes, 7.4%	150 out of 2403 genes, 6.2%	0.371031
cellular protein localization	7 out of 94 genes, 7.4%	150 out of 2403 genes, 6.2%	0.371031
positive regulation of metabolic process	4 out of 94 genes, 4.3%	79 out of 2403 genes, 3.3%	0.373547
positive regulation of cellular metabolic process	4 out of 94 genes, 4.3%	79 out of 2403 genes, 3.3%	0.373547
organonitrogen compound catabolic process	7 out of 94 genes, 7.4%	151 out of 2403 genes, 6.3%	0.377637
organic acid biosynthetic process	14 out of 94 genes, 14.9%	322 out of 2403 genes, 13.4%	0.377859
carboxylic acid biosynthetic process	14 out of 94 genes, 14.9%	322 out of 2403 genes, 13.4%	0.377859
protein targeting to chloroplast	2 out of 94 genes, 2.1%	34 out of 2403 genes, 1.4%	0.386814
establishment of protein localization to chloroplast	2 out of 94 genes, 2.1%	34 out of 2403 genes, 1.4%	0.386814
protein localization to chloroplast	2 out of 94 genes, 2.1%	34 out of 2403 genes, 1.4%	0.386814
macromolecule methylation	3 out of 94 genes, 3.2%	57 out of 2403 genes, 2.4%	0.387065
cell redox homeostasis	3 out of 94 genes, 3.2%	57 out of 2403 genes, 2.4%	0.387065
cellular macromolecule metabolic process	39 out of 94 genes, 41.5%	953 out of 2403 genes, 39.7%	0.394057
regulation of cellular process	18 out of 94 genes, 19.1%	425 out of 2403 genes, 17.7%	0.394761
response to sucrose stimulus	3 out of 94 genes, 3.2%	58 out of 2403 genes, 2.4%	0.397846
response to disaccharide stimulus	3 out of 94 genes, 3.2%	58 out of 2403 genes, 2.4%	0.397846
ribonucleotide biosynthetic process	6 out of 94 genes, 6.4%	130 out of 2403 genes, 5.4%	0.399475
ribose phosphate biosynthetic process	6 out of 94 genes, 6.4%	130 out of 2403 genes, 5.4%	0.399475
DNA metabolic process	4 out of 94 genes, 4.3%	82 out of 2403 genes, 3.4%	0.400738
negative regulation of cellular process	4 out of 94 genes, 4.3%	82 out of 2403 genes, 3.4%	0.400738
cell death	2 out of 94 genes, 2.1%	35 out of 2403 genes, 1.5%	0.400874
mRNA metabolic process	2 out of 94 genes, 2.1%	35 out of 2403 genes, 1.5%	0.400874
death	2 out of 94 genes, 2.1%	35 out of 2403 genes, 1.5%	0.400874
hormone biosynthetic process	2 out of 94 genes, 2.1%	35 out of 2403 genes, 1.5%	0.400874
pentose-phosphate shunt	7 out of 94 genes, 7.4%	155 out of 2403 genes, 6.5%	0.404118
regulation of hormone levels	3 out of 94 genes, 3.2%	59 out of 2403 genes, 2.5%	0.408579
NADPH regeneration	7 out of 94 genes, 7.4%	156 out of 2403 genes, 6.5%	0.410744
transmembrane transport	7 out of 94 genes, 7.4%	156 out of 2403 genes, 6.5%	0.410744
oxidoreduction coenzyme metabolic process	8 out of 94 genes, 8.5%	181 out of 2403 genes, 7.5%	0.413652
response to extracellular stimulus	2 out of 94 genes, 2.1%	36 out of 2403 genes, 1.5%	0.414784
cellular response to extracellular stimulus	2 out of 94 genes, 2.1%	36 out of 2403 genes, 1.5%	0.414784
cellular response to external stimulus	2 out of 94 genes, 2.1%	36 out of 2403 genes, 1.5%	0.414784
multi-organism process	13 out of 94 genes, 13.8%	305 out of 2403 genes, 12.7%	0.414908
NADP metabolic process	7 out of 94 genes, 7.4%	157 out of 2403 genes, 6.5%	0.417367
pyridine nucleotide metabolic process	7 out of 94 genes, 7.4%	157 out of 2403 genes, 6.5%	0.417367
nicotinamide nucleotide metabolic process	7 out of 94 genes, 7.4%	157 out of 2403 genes, 6.5%	0.417367
negative regulation of cellular metabolic process	3 out of 94 genes, 3.2%	60 out of 2403 genes, 2.5%	0.419257
plasma membrane ATP synthesis coupled proton transport	3 out of 94 genes, 3.2%	60 out of 2403 genes, 2.5%	0.419257
stomatal complex morphogenesis	2 out of 94 genes, 2.1%	37 out of 2403 genes, 1.5%	0.428536
stomatal complex development	2 out of 94 genes, 2.1%	37 out of 2403 genes, 1.5%	0.428536
regulation of localization	3 out of 94 genes, 3.2%	61 out of 2403 genes, 2.5%	0.429874
benzene-containing compound metabolic process	3 out of 94 genes, 3.2%	61 out of 2403 genes, 2.5%	0.429874
glucose catabolic process	13 out of 94 genes, 13.8%	309 out of 2403 genes, 12.9%	0.434447
hexose catabolic process	13 out of 94 genes, 13.8%	309 out of 2403 genes, 12.9%	0.434447
monosaccharide catabolic process	13 out of 94 genes, 13.8%	309 out of 2403 genes, 12.9%	0.434447
protein targeting	6 out of 94 genes, 6.4%	135 out of 2403 genes, 5.6%	0.435383
organic substance transport	9 out of 94 genes, 9.6%	210 out of 2403 genes, 8.7%	0.43906
cell wall modification	2 out of 94 genes, 2.1%	38 out of 2403 genes, 1.6%	0.442121
response to stimulus	47 out of 94 genes, 50.0%	1172 out of 2403 genes, 48.8%	0.444988
flower development	4 out of 94 genes, 4.3%	87 out of 2403 genes, 3.6%	0.445592
dicarboxylic acid metabolic process	3 out of 94 genes, 3.2%	63 out of 2403 genes, 2.6%	0.450902
defense response to fungus	3 out of 94 genes, 3.2%	63 out of 2403 genes, 2.6%	0.450902
terpenoid biosynthetic process	4 out of 94 genes, 4.3%	88 out of 2403 genes, 3.7%	0.454457
pyridine-containing compound metabolic process	7 out of 94 genes, 7.4%	163 out of 2403 genes, 6.8%	0.456971
single-organism carbohydrate catabolic process	13 out of 94 genes, 13.8%	314 out of 2403 genes, 13.1%	0.458883
response to jasmonic acid stimulus	3 out of 94 genes, 3.2%	64 out of 2403 genes, 2.7%	0.461303
chromosome organization	3 out of 94 genes, 3.2%	64 out of 2403 genes, 2.7%	0.461303
terpenoid metabolic process	4 out of 94 genes, 4.3%	89 out of 2403 genes, 3.7%	0.463278
hormone metabolic process	2 out of 94 genes, 2.1%	40 out of 2403 genes, 1.7%	0.468756
cell communication	7 out of 94 genes, 7.4%	165 out of 2403 genes, 6.9%	0.47008
cellular protein metabolic process	26 out of 94 genes, 27.7%	647 out of 2403 genes, 26.9%	0.475242
GTP catabolic process	2 out of 94 genes, 2.1%	41 out of 2403 genes, 1.7%	0.481793
guanosine-containing compound catabolic process	2 out of 94 genes, 2.1%	41 out of 2403 genes, 1.7%	0.481793
glycolysis	7 out of 94 genes, 7.4%	167 out of 2403 genes, 6.9%	0.48312
cellular amino acid biosynthetic process	10 out of 94 genes, 10.6%	243 out of 2403 genes, 10.1%	0.483486
macromolecule localization	8 out of 94 genes, 8.5%	193 out of 2403 genes, 8.0%	0.487406
glucose metabolic process	14 out of 94 genes, 14.9%	346 out of 2403 genes, 14.4%	0.490936
organophosphate metabolic process	19 out of 94 genes, 20.2%	474 out of 2403 genes, 19.7%	0.494517
transcription from plastid promoter	2 out of 94 genes, 2.1%	42 out of 2403 genes, 1.7%	0.494636
purine nucleoside catabolic process	3 out of 94 genes, 3.2%	68 out of 2403 genes, 2.8%	0.502041
purine nucleotide catabolic process	3 out of 94 genes, 3.2%	68 out of 2403 genes, 2.8%	0.502041
nucleoside triphosphate catabolic process	3 out of 94 genes, 3.2%	68 out of 2403 genes, 2.8%	0.502041
purine nucleoside triphosphate catabolic process	3 out of 94 genes, 3.2%	68 out of 2403 genes, 2.8%	0.502041
purine ribonucleotide catabolic process	3 out of 94 genes, 3.2%	68 out of 2403 genes, 2.8%	0.502041
nucleoside catabolic process	3 out of 94 genes, 3.2%	68 out of 2403 genes, 2.8%	0.502041
nucleotide catabolic process	3 out of 94 genes, 3.2%	68 out of 2403 genes, 2.8%	0.502041
ribonucleoside triphosphate catabolic process	3 out of 94 genes, 3.2%	68 out of 2403 genes, 2.8%	0.502041
purine ribonucleoside triphosphate catabolic process	3 out of 94 genes, 3.2%	68 out of 2403 genes, 2.8%	0.502041
ribonucleotide catabolic process	3 out of 94 genes, 3.2%	68 out of 2403 genes, 2.8%	0.502041
ribonucleoside catabolic process	3 out of 94 genes, 3.2%	68 out of 2403 genes, 2.8%	0.502041
purine ribonucleoside catabolic process	3 out of 94 genes, 3.2%	68 out of 2403 genes, 2.8%	0.502041
organophosphate catabolic process	3 out of 94 genes, 3.2%	68 out of 2403 genes, 2.8%	0.502041
purine-containing compound catabolic process	3 out of 94 genes, 3.2%	68 out of 2403 genes, 2.8%	0.502041
nucleoside phosphate catabolic process	3 out of 94 genes, 3.2%	68 out of 2403 genes, 2.8%	0.502041
nucleotide biosynthetic process	7 out of 94 genes, 7.4%	170 out of 2403 genes, 7.1%	0.502526
nucleoside phosphate biosynthetic process	7 out of 94 genes, 7.4%	170 out of 2403 genes, 7.1%	0.502526
cellular amino acid metabolic process	13 out of 94 genes, 13.8%	323 out of 2403 genes, 13.4%	0.502632
macromolecule metabolic process	41 out of 94 genes, 43.6%	1037 out of 2403 genes, 43.2%	0.503724
isopentenyl diphosphate biosynthetic process, mevalonate-independent pathway	6 out of 94 genes, 6.4%	145 out of 2403 genes, 6.0%	0.505967
glyceraldehyde-3-phosphate metabolic process	6 out of 94 genes, 6.4%	145 out of 2403 genes, 6.0%	0.505967
single-organism process	46 out of 94 genes, 48.9%	1167 out of 2403 genes, 48.6%	0.512251
isopentenyl diphosphate biosynthetic process	6 out of 94 genes, 6.4%	146 out of 2403 genes, 6.1%	0.512877
isopentenyl diphosphate metabolic process	6 out of 94 genes, 6.4%	146 out of 2403 genes, 6.1%	0.512877
protein localization	7 out of 94 genes, 7.4%	173 out of 2403 genes, 7.2%	0.521711
protein transport	7 out of 94 genes, 7.4%	173 out of 2403 genes, 7.2%	0.521711
establishment of protein localization	7 out of 94 genes, 7.4%	173 out of 2403 genes, 7.2%	0.521711
S-glycoside biosynthetic process	3 out of 94 genes, 3.2%	71 out of 2403 genes, 3.0%	0.531571
glycosinolate biosynthetic process	3 out of 94 genes, 3.2%	71 out of 2403 genes, 3.0%	0.531571
glucosinolate biosynthetic process	3 out of 94 genes, 3.2%	71 out of 2403 genes, 3.0%	0.531571
floral organ development	3 out of 94 genes, 3.2%	71 out of 2403 genes, 3.0%	0.531571
glycosyl compound catabolic process	3 out of 94 genes, 3.2%	71 out of 2403 genes, 3.0%	0.531571
aromatic compound catabolic process	4 out of 94 genes, 4.3%	97 out of 2403 genes, 4.0%	0.531882
cellular nitrogen compound catabolic process	4 out of 94 genes, 4.3%	97 out of 2403 genes, 4.0%	0.531882
heterocycle catabolic process	4 out of 94 genes, 4.3%	97 out of 2403 genes, 4.0%	0.531882
hexose metabolic process	14 out of 94 genes, 14.9%	356 out of 2403 genes, 14.8%	0.537472
chloroplast organization	5 out of 94 genes, 5.3%	124 out of 2403 genes, 5.2%	0.539949
pyruvate metabolic process	6 out of 94 genes, 6.4%	150 out of 2403 genes, 6.2%	0.540165
cytoskeleton organization	3 out of 94 genes, 3.2%	72 out of 2403 genes, 3.0%	0.541201
leaf morphogenesis	2 out of 94 genes, 2.1%	46 out of 2403 genes, 1.9%	0.543974
organophosphate biosynthetic process	13 out of 94 genes, 13.8%	332 out of 2403 genes, 13.8%	0.545656
organic cyclic compound catabolic process	4 out of 94 genes, 4.3%	99 out of 2403 genes, 4.1%	0.548386
small molecule metabolic process	34 out of 94 genes, 36.2%	873 out of 2403 genes, 36.3%	0.552896
nucleobase-containing compound biosynthetic process	9 out of 94 genes, 9.6%	230 out of 2403 genes, 9.6%	0.55312
response to zinc ion	2 out of 94 genes, 2.1%	47 out of 2403 genes, 2.0%	0.555783
chlorophyll biosynthetic process	4 out of 94 genes, 4.3%	100 out of 2403 genes, 4.2%	0.556527
carbohydrate catabolic process	13 out of 94 genes, 13.8%	335 out of 2403 genes, 13.9%	0.559758
response to external stimulus	3 out of 94 genes, 3.2%	74 out of 2403 genes, 3.1%	0.560123
signal transduction	5 out of 94 genes, 5.3%	127 out of 2403 genes, 5.3%	0.56184
protein metabolic process	28 out of 94 genes, 29.8%	722 out of 2403 genes, 30.0%	0.562225
regulation of macromolecule metabolic process	8 out of 94 genes, 8.5%	206 out of 2403 genes, 8.6%	0.564573
phospholipid biosynthetic process	6 out of 94 genes, 6.4%	154 out of 2403 genes, 6.4%	0.566811
oxidation-reduction process	28 out of 94 genes, 29.8%	724 out of 2403 genes, 30.1%	0.569287
response to fungus	3 out of 94 genes, 3.2%	75 out of 2403 genes, 3.1%	0.569411
carboxylic acid metabolic process	22 out of 94 genes, 23.4%	570 out of 2403 genes, 23.7%	0.570481
small molecule biosynthetic process	14 out of 94 genes, 14.9%	364 out of 2403 genes, 15.1%	0.573848
nucleobase-containing compound catabolic process	3 out of 94 genes, 3.2%	76 out of 2403 genes, 3.2%	0.57858
organic acid metabolic process	22 out of 94 genes, 23.4%	573 out of 2403 genes, 23.8%	0.581822
oxoacid metabolic process	22 out of 94 genes, 23.4%	573 out of 2403 genes, 23.8%	0.581822
primary metabolic process	65 out of 94 genes, 69.1%	1671 out of 2403 genes, 69.5%	0.583558
post-embryonic organ development	3 out of 94 genes, 3.2%	77 out of 2403 genes, 3.2%	0.587629
carbohydrate derivative catabolic process	3 out of 94 genes, 3.2%	77 out of 2403 genes, 3.2%	0.587629
positive regulation of cellular process	4 out of 94 genes, 4.3%	104 out of 2403 genes, 4.3%	0.588314
monosaccharide metabolic process	14 out of 94 genes, 14.9%	368 out of 2403 genes, 15.3%	0.591658
signaling	5 out of 94 genes, 5.3%	132 out of 2403 genes, 5.5%	0.597168
single organism signaling	5 out of 94 genes, 5.3%	132 out of 2403 genes, 5.5%	0.597168
regulation of primary metabolic process	8 out of 94 genes, 8.5%	212 out of 2403 genes, 8.8%	0.598566
phospholipid metabolic process	6 out of 94 genes, 6.4%	159 out of 2403 genes, 6.6%	0.599091
plant-type cell wall organization	2 out of 94 genes, 2.1%	51 out of 2403 genes, 2.1%	0.600866
post-embryonic morphogenesis	2 out of 94 genes, 2.1%	51 out of 2403 genes, 2.1%	0.600866
response to cadmium ion	16 out of 94 genes, 17.0%	423 out of 2403 genes, 17.6%	0.603851
organic substance catabolic process	22 out of 94 genes, 23.4%	579 out of 2403 genes, 24.1%	0.604212
single-organism metabolic process	51 out of 94 genes, 54.3%	1325 out of 2403 genes, 55.1%	0.611976
external encapsulating structure organization	3 out of 94 genes, 3.2%	80 out of 2403 genes, 3.3%	0.614036
cell wall organization	3 out of 94 genes, 3.2%	80 out of 2403 genes, 3.3%	0.614036
carbohydrate derivative biosynthetic process	9 out of 94 genes, 9.6%	242 out of 2403 genes, 10.1%	0.617321
response to chemical stimulus	28 out of 94 genes, 29.8%	738 out of 2403 genes, 30.7%	0.617787
single-organism biosynthetic process	15 out of 94 genes, 16.0%	401 out of 2403 genes, 16.7%	0.621081
response to carbohydrate stimulus	3 out of 94 genes, 3.2%	81 out of 2403 genes, 3.4%	0.622588
cellular response to chemical stimulus	6 out of 94 genes, 6.4%	163 out of 2403 genes, 6.8%	0.624004
porphyrin-containing compound biosynthetic process	4 out of 94 genes, 4.3%	109 out of 2403 genes, 4.5%	0.626172
tetrapyrrole biosynthetic process	4 out of 94 genes, 4.3%	109 out of 2403 genes, 4.5%	0.626172
catabolic process	23 out of 94 genes, 24.5%	612 out of 2403 genes, 25.5%	0.629793
S-glycoside metabolic process	3 out of 94 genes, 3.2%	82 out of 2403 genes, 3.4%	0.631013
glycosinolate metabolic process	3 out of 94 genes, 3.2%	82 out of 2403 genes, 3.4%	0.631013
glucosinolate metabolic process	3 out of 94 genes, 3.2%	82 out of 2403 genes, 3.4%	0.631013
macromolecule modification	10 out of 94 genes, 10.6%	272 out of 2403 genes, 11.3%	0.634384
cellular aldehyde metabolic process	6 out of 94 genes, 6.4%	165 out of 2403 genes, 6.9%	0.636136
monocarboxylic acid metabolic process	11 out of 94 genes, 11.7%	299 out of 2403 genes, 12.4%	0.636353
coenzyme metabolic process	8 out of 94 genes, 8.5%	219 out of 2403 genes, 9.1%	0.636581
establishment of protein localization to organelle	3 out of 94 genes, 3.2%	83 out of 2403 genes, 3.5%	0.63931
carbohydrate derivative metabolic process	16 out of 94 genes, 17.0%	432 out of 2403 genes, 18.0%	0.640413
cellular nitrogen compound biosynthetic process	14 out of 94 genes, 14.9%	380 out of 2403 genes, 15.8%	0.643224
cellular biosynthetic process	39 out of 94 genes, 41.5%	1029 out of 2403 genes, 42.8%	0.643658
shoot system morphogenesis	3 out of 94 genes, 3.2%	84 out of 2403 genes, 3.5%	0.647478
positive regulation of biological process	4 out of 94 genes, 4.3%	112 out of 2403 genes, 4.7%	0.647827
aromatic compound biosynthetic process	15 out of 94 genes, 16.0%	408 out of 2403 genes, 17.0%	0.64977
defense response	10 out of 94 genes, 10.6%	276 out of 2403 genes, 11.5%	0.653443
chlorophyll metabolic process	4 out of 94 genes, 4.3%	113 out of 2403 genes, 4.7%	0.654863
defense response, incompatible interaction	4 out of 94 genes, 4.3%	114 out of 2403 genes, 4.7%	0.661808
transcription, DNA-dependent	2 out of 94 genes, 2.1%	57 out of 2403 genes, 2.4%	0.661977
RNA biosynthetic process	2 out of 94 genes, 2.1%	57 out of 2403 genes, 2.4%	0.661977
response to salt stress	9 out of 94 genes, 9.6%	251 out of 2403 genes, 10.4%	0.66237
response to other organism	10 out of 94 genes, 10.6%	278 out of 2403 genes, 11.6%	0.662773
methylation	3 out of 94 genes, 3.2%	86 out of 2403 genes, 3.6%	0.663426
response to endogenous stimulus	6 out of 94 genes, 6.4%	170 out of 2403 genes, 7.1%	0.665472
intracellular transport	7 out of 94 genes, 7.4%	198 out of 2403 genes, 8.2%	0.6688
organ morphogenesis	2 out of 94 genes, 2.1%	58 out of 2403 genes, 2.4%	0.671411
isoprenoid biosynthetic process	7 out of 94 genes, 7.4%	199 out of 2403 genes, 8.3%	0.674097
regulation of transcription, DNA-dependent	4 out of 94 genes, 4.3%	116 out of 2403 genes, 4.8%	0.675417
regulation of RNA biosynthetic process	4 out of 94 genes, 4.3%	116 out of 2403 genes, 4.8%	0.675417
reproductive process	8 out of 94 genes, 8.5%	227 out of 2403 genes, 9.4%	0.67758
isoprenoid metabolic process	7 out of 94 genes, 7.4%	200 out of 2403 genes, 8.3%	0.679342
regulation of biological process	20 out of 94 genes, 21.3%	548 out of 2403 genes, 22.8%	0.680478
reductive pentose-phosphate cycle	2 out of 94 genes, 2.1%	59 out of 2403 genes, 2.5%	0.680633
photosynthesis, dark reaction	2 out of 94 genes, 2.1%	59 out of 2403 genes, 2.5%	0.680633
response to biotic stimulus	10 out of 94 genes, 10.6%	282 out of 2403 genes, 11.7%	0.681018
response to osmotic stress	9 out of 94 genes, 9.6%	256 out of 2403 genes, 10.7%	0.686081
pigment biosynthetic process	5 out of 94 genes, 5.3%	146 out of 2403 genes, 6.1%	0.687266
photorespiration	4 out of 94 genes, 4.3%	118 out of 2403 genes, 4.9%	0.688653
regulation of RNA metabolic process	4 out of 94 genes, 4.3%	118 out of 2403 genes, 4.9%	0.688653
organic substance biosynthetic process	40 out of 94 genes, 42.6%	1070 out of 2403 genes, 44.5%	0.689978
biosynthetic process	42 out of 94 genes, 44.7%	1123 out of 2403 genes, 46.7%	0.695121
response to metal ion	16 out of 94 genes, 17.0%	447 out of 2403 genes, 18.6%	0.697647
plant-type cell wall organization or biogenesis	2 out of 94 genes, 2.1%	61 out of 2403 genes, 2.5%	0.698452
response to inorganic substance	19 out of 94 genes, 20.2%	531 out of 2403 genes, 22.1%	0.712588
porphyrin-containing compound metabolic process	4 out of 94 genes, 4.3%	122 out of 2403 genes, 5.1%	0.713993
tetrapyrrole metabolic process	4 out of 94 genes, 4.3%	122 out of 2403 genes, 5.1%	0.713993
cellular response to stimulus	11 out of 94 genes, 11.7%	318 out of 2403 genes, 13.2%	0.718687
organic substance metabolic process	67 out of 94 genes, 71.3%	1764 out of 2403 genes, 73.4%	0.728094
cellular response to oxygen-containing compound	4 out of 94 genes, 4.3%	125 out of 2403 genes, 5.2%	0.732007
pigment metabolic process	5 out of 94 genes, 5.3%	154 out of 2403 genes, 6.4%	0.732363
heterocycle biosynthetic process	13 out of 94 genes, 13.8%	376 out of 2403 genes, 15.6%	0.732634
protein localization to organelle	3 out of 94 genes, 3.2%	96 out of 2403 genes, 4.0%	0.735408
secondary metabolite biosynthetic process	3 out of 94 genes, 3.2%	97 out of 2403 genes, 4.0%	0.741904
developmental process involved in reproduction	7 out of 94 genes, 7.4%	213 out of 2403 genes, 8.9%	0.742752
cellular localization	9 out of 94 genes, 9.6%	269 out of 2403 genes, 11.2%	0.742954
cellular metabolic compound salvage	4 out of 94 genes, 4.3%	127 out of 2403 genes, 5.3%	0.743547
reproduction	8 out of 94 genes, 8.5%	242 out of 2403 genes, 10.1%	0.746666
immune response	4 out of 94 genes, 4.3%	128 out of 2403 genes, 5.3%	0.749177
regulation of macromolecule biosynthetic process	4 out of 94 genes, 4.3%	128 out of 2403 genes, 5.3%	0.749177
innate immune response	4 out of 94 genes, 4.3%	128 out of 2403 genes, 5.3%	0.749177
regulation of cellular macromolecule biosynthetic process	4 out of 94 genes, 4.3%	128 out of 2403 genes, 5.3%	0.749177
organic cyclic compound biosynthetic process	15 out of 94 genes, 16.0%	436 out of 2403 genes, 18.1%	0.752848
regulation of nucleobase-containing compound metabolic process	4 out of 94 genes, 4.3%	129 out of 2403 genes, 5.4%	0.754714
aromatic amino acid family metabolic process	2 out of 94 genes, 2.1%	69 out of 2403 genes, 2.9%	0.761734
positive regulation of catalytic activity	2 out of 94 genes, 2.1%	69 out of 2403 genes, 2.9%	0.761734
positive regulation of molecular function	2 out of 94 genes, 2.1%	69 out of 2403 genes, 2.9%	0.761734
cofactor metabolic process	9 out of 94 genes, 9.6%	274 out of 2403 genes, 11.4%	0.762919
response to stress	29 out of 94 genes, 30.9%	812 out of 2403 genes, 33.8%	0.764372
regulation of nitrogen compound metabolic process	4 out of 94 genes, 4.3%	134 out of 2403 genes, 5.6%	0.78102
leaf development	2 out of 94 genes, 2.1%	72 out of 2403 genes, 3.0%	0.782365
immune system process	4 out of 94 genes, 4.3%	135 out of 2403 genes, 5.6%	0.786009
response to hormone stimulus	5 out of 94 genes, 5.3%	165 out of 2403 genes, 6.9%	0.786566
phosphate-containing compound metabolic process	20 out of 94 genes, 21.3%	582 out of 2403 genes, 24.2%	0.786734
regulation of cellular biosynthetic process	4 out of 94 genes, 4.3%	136 out of 2403 genes, 5.7%	0.79091
amine metabolic process	2 out of 94 genes, 2.1%	74 out of 2403 genes, 3.1%	0.795245
growth	2 out of 94 genes, 2.1%	74 out of 2403 genes, 3.1%	0.795245
phyllome development	2 out of 94 genes, 2.1%	74 out of 2403 genes, 3.1%	0.795245
plastid membrane organization	3 out of 94 genes, 3.2%	107 out of 2403 genes, 4.5%	0.800162
thylakoid membrane organization	3 out of 94 genes, 3.2%	107 out of 2403 genes, 4.5%	0.800162
reactive oxygen species metabolic process	2 out of 94 genes, 2.1%	75 out of 2403 genes, 3.1%	0.801432
regulation of biosynthetic process	4 out of 94 genes, 4.3%	139 out of 2403 genes, 5.8%	0.805084
chloroplast relocation	2 out of 94 genes, 2.1%	76 out of 2403 genes, 3.2%	0.807455
carbon fixation	2 out of 94 genes, 2.1%	76 out of 2403 genes, 3.2%	0.807455
plastid localization	2 out of 94 genes, 2.1%	76 out of 2403 genes, 3.2%	0.807455
establishment of organelle localization	2 out of 94 genes, 2.1%	76 out of 2403 genes, 3.2%	0.807455
establishment of plastid localization	2 out of 94 genes, 2.1%	76 out of 2403 genes, 3.2%	0.807455
cellular lipid metabolic process	9 out of 94 genes, 9.6%	287 out of 2403 genes, 11.9%	0.809787
proteasomal protein catabolic process	2 out of 94 genes, 2.1%	77 out of 2403 genes, 3.2%	0.813318
organelle localization	2 out of 94 genes, 2.1%	77 out of 2403 genes, 3.2%	0.813318
regulation of gene expression	4 out of 94 genes, 4.3%	141 out of 2403 genes, 5.9%	0.814101
cell wall organization or biogenesis	3 out of 94 genes, 3.2%	111 out of 2403 genes, 4.6%	0.820228
response to heat	2 out of 94 genes, 2.1%	79 out of 2403 genes, 3.3%	0.824572
shoot system development	3 out of 94 genes, 3.2%	112 out of 2403 genes, 4.7%	0.824973
establishment of localization in cell	8 out of 94 genes, 8.5%	263 out of 2403 genes, 10.9%	0.825438
phosphorus metabolic process	20 out of 94 genes, 21.3%	601 out of 2403 genes, 25.0%	0.834877
cellular catabolic process	11 out of 94 genes, 11.7%	353 out of 2403 genes, 14.7%	0.837344
cofactor biosynthetic process	4 out of 94 genes, 4.3%	147 out of 2403 genes, 6.1%	0.839154
anatomical structure morphogenesis	5 out of 94 genes, 5.3%	178 out of 2403 genes, 7.4%	0.839398
single-organism carbohydrate metabolic process	16 out of 94 genes, 17.0%	497 out of 2403 genes, 20.7%	0.847548
cytoplasmic transport	3 out of 94 genes, 3.2%	119 out of 2403 genes, 5.0%	0.855318
cell differentiation	3 out of 94 genes, 3.2%	120 out of 2403 genes, 5.0%	0.859262
single-organism developmental process	10 out of 94 genes, 10.6%	335 out of 2403 genes, 13.9%	0.865293
cellular macromolecule biosynthetic process	13 out of 94 genes, 13.8%	421 out of 2403 genes, 17.5%	0.865666
response to hydrogen peroxide	2 out of 94 genes, 2.1%	89 out of 2403 genes, 3.7%	0.872264
carbohydrate biosynthetic process	8 out of 94 genes, 8.5%	280 out of 2403 genes, 11.7%	0.874441
organ development	6 out of 94 genes, 6.4%	220 out of 2403 genes, 9.2%	0.875402
reproductive structure development	5 out of 94 genes, 5.3%	189 out of 2403 genes, 7.9%	0.875419
reproductive system development	5 out of 94 genes, 5.3%	189 out of 2403 genes, 7.9%	0.875419
post-embryonic development	7 out of 94 genes, 7.4%	251 out of 2403 genes, 10.4%	0.876908
cellular protein modification process	6 out of 94 genes, 6.4%	221 out of 2403 genes, 9.2%	0.878142
protein modification process	6 out of 94 genes, 6.4%	221 out of 2403 genes, 9.2%	0.878142
lipid biosynthetic process	7 out of 94 genes, 7.4%	253 out of 2403 genes, 10.5%	0.882013
cellular membrane organization	3 out of 94 genes, 3.2%	127 out of 2403 genes, 5.3%	0.884353
membrane organization	3 out of 94 genes, 3.2%	127 out of 2403 genes, 5.3%	0.884353
lipid metabolic process	9 out of 94 genes, 9.6%	314 out of 2403 genes, 13.1%	0.884843
regulation of catalytic activity	2 out of 94 genes, 2.1%	93 out of 2403 genes, 3.9%	0.887797
regulation of molecular function	2 out of 94 genes, 2.1%	98 out of 2403 genes, 4.1%	0.904777
response to organic substance	9 out of 94 genes, 9.6%	324 out of 2403 genes, 13.5%	0.905752
macromolecule biosynthetic process	13 out of 94 genes, 13.8%	444 out of 2403 genes, 18.5%	0.910491
secondary metabolic process	4 out of 94 genes, 4.3%	170 out of 2403 genes, 7.1%	0.910748
cellular developmental process	3 out of 94 genes, 3.2%	136 out of 2403 genes, 5.7%	0.910788
single-multicellular organism process	13 out of 94 genes, 13.8%	452 out of 2403 genes, 18.8%	0.92292
multicellular organismal process	13 out of 94 genes, 13.8%	454 out of 2403 genes, 18.9%	0.925796
response to oxygen-containing compound	9 out of 94 genes, 9.6%	336 out of 2403 genes, 14.0%	0.926623
response to reactive oxygen species	2 out of 94 genes, 2.1%	106 out of 2403 genes, 4.4%	0.927082
anatomical structure development	11 out of 94 genes, 11.7%	404 out of 2403 genes, 16.8%	0.937751
response to oxidative stress	4 out of 94 genes, 4.3%	184 out of 2403 genes, 7.7%	0.939106
multicellular organismal development	12 out of 94 genes, 12.8%	438 out of 2403 genes, 18.2%	0.942967
system development	9 out of 94 genes, 9.6%	348 out of 2403 genes, 14.5%	0.943466
cellular response to stress	4 out of 94 genes, 4.3%	188 out of 2403 genes, 7.8%	0.945572
protein catabolic process	3 out of 94 genes, 3.2%	154 out of 2403 genes, 6.4%	0.948041
carbohydrate metabolic process	17 out of 94 genes, 18.1%	591 out of 2403 genes, 24.6%	0.950978
proteolysis involved in cellular protein catabolic process	2 out of 94 genes, 2.1%	126 out of 2403 genes, 5.2%	0.963348
developmental process	12 out of 94 genes, 12.8%	470 out of 2403 genes, 19.6%	0.971261
phosphorylation	2 out of 94 genes, 2.1%	133 out of 2403 genes, 5.5%	0.971368
proteolysis	4 out of 94 genes, 4.3%	215 out of 2403 genes, 8.9%	0.97529
cellular carbohydrate metabolic process	3 out of 94 genes, 3.2%	180 out of 2403 genes, 7.5%	0.977225
cellular protein catabolic process	2 out of 94 genes, 2.1%	149 out of 2403 genes, 6.2%	0.983889
macromolecule catabolic process	3 out of 94 genes, 3.2%	195 out of 2403 genes, 8.1%	0.986137
cellular macromolecule catabolic process	2 out of 94 genes, 2.1%	160 out of 2403 genes, 6.7%	0.989235

## Sheet: cellular component
Gene Ontology term	Cluster frequency	Protein frequency of use	P-value
chloroplast thylakoid membrane	39 out of 94 genes, 41.5%	398 out of 2368 genes, 16.8%	6.24379e-09
plastid thylakoid membrane	39 out of 94 genes, 41.5%	398 out of 2368 genes, 16.8%	6.24379e-09
chloroplast thylakoid	42 out of 94 genes, 44.7%	464 out of 2368 genes, 19.6%	1.38054e-08
plastid thylakoid	42 out of 94 genes, 44.7%	464 out of 2368 genes, 19.6%	1.38054e-08
organelle subcompartment	42 out of 94 genes, 44.7%	464 out of 2368 genes, 19.6%	1.38054e-08
thylakoid membrane	39 out of 94 genes, 41.5%	410 out of 2368 genes, 17.3%	1.5195e-08
photosynthetic membrane	39 out of 94 genes, 41.5%	428 out of 2368 genes, 18.1%	5.36919e-08
thylakoid part	40 out of 94 genes, 42.6%	450 out of 2368 genes, 19.0%	6.71145e-08
thylakoid	46 out of 94 genes, 48.9%	591 out of 2368 genes, 25.0%	2.54723e-07
photosystem	18 out of 94 genes, 19.1%	132 out of 2368 genes, 5.6%	2.08485e-06
macromolecular complex	48 out of 94 genes, 51.1%	687 out of 2368 genes, 29.0%	3.67417e-06
photosystem I reaction center	6 out of 94 genes, 6.4%	13 out of 2368 genes, 0.5%	4.57599e-06
plastoglobule	14 out of 94 genes, 14.9%	92 out of 2368 genes, 3.9%	9.02493e-06
membrane	69 out of 94 genes, 73.4%	1278 out of 2368 genes, 54.0%	6.34972e-05
photosystem I	7 out of 94 genes, 7.4%	28 out of 2368 genes, 1.2%	7.42582e-05
intracellular organelle part	71 out of 94 genes, 75.5%	1349 out of 2368 genes, 57.0%	0.000106872
organelle part	71 out of 94 genes, 75.5%	1350 out of 2368 genes, 57.0%	0.00011038
thylakoid lumen	14 out of 94 genes, 14.9%	120 out of 2368 genes, 5.1%	0.00019093
plastid envelope	34 out of 94 genes, 36.2%	497 out of 2368 genes, 21.0%	0.000389006
plastid part	54 out of 94 genes, 57.4%	956 out of 2368 genes, 40.4%	0.000482937
protein complex	31 out of 94 genes, 33.0%	444 out of 2368 genes, 18.8%	0.000556621
chloroplast envelope	32 out of 94 genes, 34.0%	476 out of 2368 genes, 20.1%	0.000873945
photosystem II	12 out of 94 genes, 12.8%	108 out of 2368 genes, 4.6%	0.000896057
chloroplast part	53 out of 94 genes, 56.4%	953 out of 2368 genes, 40.2%	0.0009193
chloroplast	70 out of 94 genes, 74.5%	1422 out of 2368 genes, 60.1%	0.00204256
light-harvesting complex	6 out of 94 genes, 6.4%	35 out of 2368 genes, 1.5%	0.00212952
membrane part	27 out of 94 genes, 28.7%	411 out of 2368 genes, 17.4%	0.00367723
oxygen evolving complex	7 out of 94 genes, 7.4%	52 out of 2368 genes, 2.2%	0.00384321
chloroplast thylakoid lumen	9 out of 94 genes, 9.6%	83 out of 2368 genes, 3.5%	0.00480389
plastid thylakoid lumen	9 out of 94 genes, 9.6%	83 out of 2368 genes, 3.5%	0.00480389
organelle envelope	35 out of 94 genes, 37.2%	593 out of 2368 genes, 25.0%	0.00503939
nucleolus	16 out of 94 genes, 17.0%	203 out of 2368 genes, 8.6%	0.00515123
envelope	35 out of 94 genes, 37.2%	594 out of 2368 genes, 25.1%	0.00518883
plastid	70 out of 94 genes, 74.5%	1468 out of 2368 genes, 62.0%	0.00643167
nucleosome	3 out of 94 genes, 3.2%	11 out of 2368 genes, 0.5%	0.00792784
protein-DNA complex	3 out of 94 genes, 3.2%	11 out of 2368 genes, 0.5%	0.00792784
nuclear lumen	16 out of 94 genes, 17.0%	216 out of 2368 genes, 9.1%	0.00938282
chloroplast stroma	35 out of 94 genes, 37.2%	617 out of 2368 genes, 26.1%	0.00984352
plastid stroma	35 out of 94 genes, 37.2%	623 out of 2368 genes, 26.3%	0.0115204
nuclear part	16 out of 94 genes, 17.0%	227 out of 2368 genes, 9.6%	0.0148308
apoplast	23 out of 94 genes, 24.5%	370 out of 2368 genes, 15.6%	0.0152032
extrinsic to membrane	6 out of 94 genes, 6.4%	52 out of 2368 genes, 2.2%	0.0155195
organelle lumen	16 out of 94 genes, 17.0%	245 out of 2368 genes, 10.3%	0.0287864
intracellular organelle lumen	16 out of 94 genes, 17.0%	245 out of 2368 genes, 10.3%	0.0287864
membrane-enclosed lumen	16 out of 94 genes, 17.0%	248 out of 2368 genes, 10.5%	0.0318493
chromatin	3 out of 94 genes, 3.2%	18 out of 2368 genes, 0.8%	0.0320669
glycine cleavage complex	2 out of 94 genes, 2.1%	8 out of 2368 genes, 0.3%	0.0373488
cytosolic small ribosomal subunit	4 out of 94 genes, 4.3%	33 out of 2368 genes, 1.4%	0.0394701
chromosomal part	3 out of 94 genes, 3.2%	21 out of 2368 genes, 0.9%	0.0479912
cytosolic part	12 out of 94 genes, 12.8%	187 out of 2368 genes, 7.9%	0.062653
cytosolic ribosome	11 out of 94 genes, 11.7%	167 out of 2368 genes, 7.1%	0.0630449
chloroplast photosystem II	3 out of 94 genes, 3.2%	24 out of 2368 genes, 1.0%	0.0670943
non-membrane-bounded organelle	22 out of 94 genes, 23.4%	405 out of 2368 genes, 17.1%	0.0686738
intracellular non-membrane-bounded organelle	22 out of 94 genes, 23.4%	405 out of 2368 genes, 17.1%	0.0686738
extracellular region	24 out of 94 genes, 25.5%	450 out of 2368 genes, 19.0%	0.0687829
small ribosomal subunit	4 out of 94 genes, 4.3%	42 out of 2368 genes, 1.8%	0.0826069
ribosome	13 out of 94 genes, 13.8%	228 out of 2368 genes, 9.6%	0.1123
ribonucleoprotein complex	14 out of 94 genes, 14.9%	255 out of 2368 genes, 10.8%	0.127517
Golgi apparatus	10 out of 94 genes, 10.6%	171 out of 2368 genes, 7.2%	0.136276
intracellular organelle	85 out of 94 genes, 90.4%	2048 out of 2368 genes, 86.5%	0.161932
organelle	85 out of 94 genes, 90.4%	2049 out of 2368 genes, 86.5%	0.16484
chromosome	3 out of 94 genes, 3.2%	36 out of 2368 genes, 1.5%	0.169503
ribosomal subunit	6 out of 94 genes, 6.4%	96 out of 2368 genes, 4.1%	0.178577
proton-transporting two-sector ATPase complex, catalytic domain	5 out of 94 genes, 5.3%	76 out of 2368 genes, 3.2%	0.181288
cytoplasmic part	84 out of 94 genes, 89.4%	2040 out of 2368 genes, 86.1%	0.225502
proton-transporting ATP synthase complex, catalytic core F(1)	4 out of 94 genes, 4.3%	64 out of 2368 genes, 2.7%	0.247545
proton-transporting two-sector ATPase complex	5 out of 94 genes, 5.3%	88 out of 2368 genes, 3.7%	0.269271
nucleus	23 out of 94 genes, 24.5%	523 out of 2368 genes, 22.1%	0.32331
proton-transporting ATP synthase complex	4 out of 94 genes, 4.3%	76 out of 2368 genes, 3.2%	0.356495
cytoplasm	86 out of 94 genes, 91.5%	2127 out of 2368 genes, 89.8%	0.369503
vacuole	14 out of 94 genes, 14.9%	322 out of 2368 genes, 13.6%	0.400137
intrinsic to membrane	8 out of 94 genes, 8.5%	179 out of 2368 genes, 7.6%	0.417645
stromule	4 out of 94 genes, 4.3%	83 out of 2368 genes, 3.5%	0.420826
plasma membrane part	2 out of 94 genes, 2.1%	36 out of 2368 genes, 1.5%	0.422165
cytosolic large ribosomal subunit	2 out of 94 genes, 2.1%	37 out of 2368 genes, 1.6%	0.436033
intracellular membrane-bounded organelle	81 out of 94 genes, 86.2%	2012 out of 2368 genes, 85.0%	0.438464
integral to membrane	7 out of 94 genes, 7.4%	158 out of 2368 genes, 6.7%	0.439432
membrane-bounded organelle	81 out of 94 genes, 86.2%	2013 out of 2368 genes, 85.0%	0.443069
cytosol	28 out of 94 genes, 29.8%	684 out of 2368 genes, 28.9%	0.461855
cell	93 out of 94 genes, 98.9%	2324 out of 2368 genes, 98.1%	0.472235
cell part	93 out of 94 genes, 98.9%	2324 out of 2368 genes, 98.1%	0.472235
plasma membrane	26 out of 94 genes, 27.7%	639 out of 2368 genes, 27.0%	0.480603
intracellular part	89 out of 94 genes, 94.7%	2227 out of 2368 genes, 94.0%	0.507334
intracellular	89 out of 94 genes, 94.7%	2232 out of 2368 genes, 94.3%	0.543122
large ribosomal subunit	2 out of 94 genes, 2.1%	54 out of 2368 genes, 2.3%	0.64054
cell periphery	29 out of 94 genes, 30.9%	768 out of 2368 genes, 32.4%	0.668771
vacuolar membrane	5 out of 94 genes, 5.3%	144 out of 2368 genes, 6.1%	0.688102
vacuolar part	5 out of 94 genes, 5.3%	147 out of 2368 genes, 6.2%	0.7058
peroxisome	2 out of 94 genes, 2.1%	72 out of 2368 genes, 3.0%	0.789393
microbody	2 out of 94 genes, 2.1%	72 out of 2368 genes, 3.0%	0.789393
cell wall	8 out of 94 genes, 8.5%	265 out of 2368 genes, 11.2%	0.844001
external encapsulating structure	8 out of 94 genes, 8.5%	266 out of 2368 genes, 11.2%	0.847014
cell-cell junction	4 out of 94 genes, 4.3%	148 out of 2368 genes, 6.2%	0.851373
plasmodesma	4 out of 94 genes, 4.3%	148 out of 2368 genes, 6.2%	0.851373
symplast	4 out of 94 genes, 4.3%	148 out of 2368 genes, 6.2%	0.851373
cell junction	4 out of 94 genes, 4.3%	149 out of 2368 genes, 6.3%	0.855074
mitochondrion	16 out of 94 genes, 17.0%	498 out of 2368 genes, 21.0%	0.866244
mitochondrial envelope	2 out of 94 genes, 2.1%	97 out of 2368 genes, 4.1%	0.906199
mitochondrial part	2 out of 94 genes, 2.1%	112 out of 2368 genes, 4.7%	0.943827
organelle membrane	6 out of 94 genes, 6.4%	253 out of 2368 genes, 10.7%	0.947956

## Sheet: molecular function
Gene Ontology term	Cluster frequency	Protein frequency of use	P-value
metal ion binding	37 out of 84 genes, 44.0%	641 out of 2303 genes, 27.8%	0.000863621
cation binding	37 out of 84 genes, 44.0%	674 out of 2303 genes, 29.3%	0.00238007
structural molecule activity	13 out of 84 genes, 15.5%	176 out of 2303 genes, 7.6%	0.00981306
calcium ion binding	7 out of 84 genes, 8.3%	72 out of 2303 genes, 3.1%	0.0144039
aminomethyltransferase activity	2 out of 84 genes, 2.4%	7 out of 2303 genes, 0.3%	0.024505
structural constituent of ribosome	10 out of 84 genes, 11.9%	137 out of 2303 genes, 5.9%	0.0249664
transition metal ion binding	20 out of 84 genes, 23.8%	356 out of 2303 genes, 15.5%	0.0271293
malic enzyme activity	2 out of 84 genes, 2.4%	8 out of 2303 genes, 0.3%	0.0319078
malate dehydrogenase (oxaloacetate-decarboxylating) activity	2 out of 84 genes, 2.4%	8 out of 2303 genes, 0.3%	0.0319078
iron ion binding	5 out of 84 genes, 6.0%	53 out of 2303 genes, 2.3%	0.0416292
poly-pyrimidine tract binding	5 out of 84 genes, 6.0%	55 out of 2303 genes, 2.4%	0.0477018
poly(U) RNA binding	5 out of 84 genes, 6.0%	55 out of 2303 genes, 2.4%	0.0477018
single-stranded RNA binding	5 out of 84 genes, 6.0%	56 out of 2303 genes, 2.4%	0.0509262
peptidyl-prolyl cis-trans isomerase activity	4 out of 84 genes, 4.8%	44 out of 2303 genes, 1.9%	0.0739889
cis-trans isomerase activity	4 out of 84 genes, 4.8%	44 out of 2303 genes, 1.9%	0.0739889
macrolide binding	2 out of 84 genes, 2.4%	13 out of 2303 genes, 0.6%	0.0790314
FK506 binding	2 out of 84 genes, 2.4%	13 out of 2303 genes, 0.6%	0.0790314
hydrogen-exporting ATPase activity, phosphorylative mechanism	4 out of 84 genes, 4.8%	45 out of 2303 genes, 2.0%	0.0790393
ion binding	47 out of 84 genes, 56.0%	1109 out of 2303 genes, 48.2%	0.0891694
electron transporter, transferring electrons within the cyclic electron transport pathway of photosynthesis activity	3 out of 84 genes, 3.6%	30 out of 2303 genes, 1.3%	0.0937622
electron carrier activity	8 out of 84 genes, 9.5%	130 out of 2303 genes, 5.6%	0.0976998
drug binding	2 out of 84 genes, 2.4%	15 out of 2303 genes, 0.7%	0.101553
2-alkenal reductase [NAD(P)] activity	4 out of 84 genes, 4.8%	50 out of 2303 genes, 2.2%	0.106768
malate dehydrogenase activity	3 out of 84 genes, 3.6%	32 out of 2303 genes, 1.4%	0.108843
ATPase activity, coupled to transmembrane movement of ions, phosphorylative mechanism	4 out of 84 genes, 4.8%	51 out of 2303 genes, 2.2%	0.112786
proton-transporting ATPase activity, rotational mechanism	5 out of 84 genes, 6.0%	76 out of 2303 genes, 3.3%	0.141144
RNA binding	12 out of 84 genes, 14.3%	236 out of 2303 genes, 10.2%	0.144984
proton-transporting ATP synthase activity, rotational mechanism	5 out of 84 genes, 6.0%	77 out of 2303 genes, 3.3%	0.146844
ATPase activity, coupled to transmembrane movement of ions, rotational mechanism	5 out of 84 genes, 6.0%	81 out of 2303 genes, 3.5%	0.170612
copper ion binding	9 out of 84 genes, 10.7%	176 out of 2303 genes, 7.6%	0.187778
chlorophyll binding	3 out of 84 genes, 3.6%	43 out of 2303 genes, 1.9%	0.205237
nucleic acid binding	16 out of 84 genes, 19.0%	354 out of 2303 genes, 15.4%	0.208958
tetrapyrrole binding	6 out of 84 genes, 7.1%	110 out of 2303 genes, 4.8%	0.20981
cation-transporting ATPase activity	5 out of 84 genes, 6.0%	90 out of 2303 genes, 3.9%	0.228981
ATPase activity, coupled to transmembrane movement of ions	5 out of 84 genes, 6.0%	94 out of 2303 genes, 4.1%	0.256665
oxidoreductase activity, acting on the CH-CH group of donors, NAD or NADP as acceptor	4 out of 84 genes, 4.8%	72 out of 2303 genes, 3.1%	0.266661
binding	64 out of 84 genes, 76.2%	1673 out of 2303 genes, 72.6%	0.272008
ATPase activity, coupled to transmembrane movement of substances	5 out of 84 genes, 6.0%	100 out of 2303 genes, 4.3%	0.299619
ATPase activity, coupled to movement of substances	5 out of 84 genes, 6.0%	100 out of 2303 genes, 4.3%	0.299619
monooxygenase activity	3 out of 84 genes, 3.6%	53 out of 2303 genes, 2.3%	0.304515
carbon-oxygen lyase activity	3 out of 84 genes, 3.6%	53 out of 2303 genes, 2.3%	0.304515
hydrolase activity, acting on acid anhydrides, catalyzing transmembrane movement of substances	5 out of 84 genes, 6.0%	101 out of 2303 genes, 4.4%	0.306906
protein disulfide oxidoreductase activity	2 out of 84 genes, 2.4%	31 out of 2303 genes, 1.3%	0.313285
primary active transmembrane transporter activity	5 out of 84 genes, 6.0%	103 out of 2303 genes, 4.5%	0.32156
P-P-bond-hydrolysis-driven transmembrane transporter activity	5 out of 84 genes, 6.0%	103 out of 2303 genes, 4.5%	0.32156
oxidoreductase activity, acting on paired donors, with incorporation or reduction of molecular oxygen	2 out of 84 genes, 2.4%	32 out of 2303 genes, 1.4%	0.326915
hydrogen ion transmembrane transporter activity	5 out of 84 genes, 6.0%	105 out of 2303 genes, 4.6%	0.336304
oxidoreductase activity, acting on the CH-CH group of donors	4 out of 84 genes, 4.8%	81 out of 2303 genes, 3.5%	0.341976
monovalent inorganic cation transmembrane transporter activity	5 out of 84 genes, 6.0%	106 out of 2303 genes, 4.6%	0.343702
ATPase activity, coupled	6 out of 84 genes, 7.1%	132 out of 2303 genes, 5.7%	0.349683
translation elongation factor activity	2 out of 84 genes, 2.4%	36 out of 2303 genes, 1.6%	0.380624
inorganic cation transmembrane transporter activity	5 out of 84 genes, 6.0%	111 out of 2303 genes, 4.8%	0.380843
ion transmembrane transporter activity	6 out of 84 genes, 7.1%	138 out of 2303 genes, 6.0%	0.389926
active transmembrane transporter activity	5 out of 84 genes, 6.0%	113 out of 2303 genes, 4.9%	0.395717
ATPase activity	6 out of 84 genes, 7.1%	142 out of 2303 genes, 6.2%	0.416811
disulfide oxidoreductase activity	2 out of 84 genes, 2.4%	39 out of 2303 genes, 1.7%	0.419745
heterocyclic compound binding	42 out of 84 genes, 50.0%	1113 out of 2303 genes, 48.3%	0.419933
organic cyclic compound binding	42 out of 84 genes, 50.0%	1114 out of 2303 genes, 48.4%	0.423116
isomerase activity	5 out of 84 genes, 6.0%	117 out of 2303 genes, 5.1%	0.425385
hydro-lyase activity	2 out of 84 genes, 2.4%	40 out of 2303 genes, 1.7%	0.432515
cation transmembrane transporter activity	5 out of 84 genes, 6.0%	118 out of 2303 genes, 5.1%	0.43277
substrate-specific transmembrane transporter activity	6 out of 84 genes, 7.1%	146 out of 2303 genes, 6.3%	0.443598
heme binding	3 out of 84 genes, 3.6%	68 out of 2303 genes, 3.0%	0.455145
transporter activity	7 out of 84 genes, 8.3%	175 out of 2303 genes, 7.6%	0.458278
peroxidase activity	2 out of 84 genes, 2.4%	43 out of 2303 genes, 1.9%	0.46992
oxidoreductase activity, acting on peroxide as acceptor	2 out of 84 genes, 2.4%	43 out of 2303 genes, 1.9%	0.46992
GTPase activity	2 out of 84 genes, 2.4%	44 out of 2303 genes, 1.9%	0.482066
methyltransferase activity	2 out of 84 genes, 2.4%	44 out of 2303 genes, 1.9%	0.482066
oxidoreductase activity	22 out of 84 genes, 26.2%	588 out of 2303 genes, 25.5%	0.486857
transmembrane transporter activity	6 out of 84 genes, 7.1%	153 out of 2303 genes, 6.6%	0.489903
substrate-specific transporter activity	6 out of 84 genes, 7.1%	154 out of 2303 genes, 6.7%	0.496433
nucleoside-triphosphatase activity	8 out of 84 genes, 9.5%	209 out of 2303 genes, 9.1%	0.499119
transferase activity, transferring one-carbon groups	2 out of 84 genes, 2.4%	46 out of 2303 genes, 2.0%	0.505849
DNA binding	3 out of 84 genes, 3.6%	74 out of 2303 genes, 3.2%	0.512041
oxidoreductase activity, acting on the CH-OH group of donors, NAD or NADP as acceptor	4 out of 84 genes, 4.8%	102 out of 2303 genes, 4.4%	0.51616
antioxidant activity	3 out of 84 genes, 3.6%	76 out of 2303 genes, 3.3%	0.530329
pyrophosphatase activity	8 out of 84 genes, 9.5%	215 out of 2303 genes, 9.3%	0.532742
hydrolase activity, acting on acid anhydrides, in phosphorus-containing anhydrides	8 out of 84 genes, 9.5%	217 out of 2303 genes, 9.4%	0.543783
protein binding	12 out of 84 genes, 14.3%	328 out of 2303 genes, 14.2%	0.544704
oxidoreductase activity, acting on CH-OH group of donors	4 out of 84 genes, 4.8%	107 out of 2303 genes, 4.6%	0.554868
ribulose-bisphosphate carboxylase activity	2 out of 84 genes, 2.4%	51 out of 2303 genes, 2.2%	0.562182
hydrolase activity, acting on acid anhydrides	8 out of 84 genes, 9.5%	222 out of 2303 genes, 9.6%	0.570956
NAD binding	2 out of 84 genes, 2.4%	52 out of 2303 genes, 2.3%	0.572894
lyase activity	6 out of 84 genes, 7.1%	178 out of 2303 genes, 7.7%	0.642613
translation factor activity, nucleic acid binding	2 out of 84 genes, 2.4%	61 out of 2303 genes, 2.6%	0.660827
oxidoreductase activity, acting on a sulfur group of donors	2 out of 84 genes, 2.4%	61 out of 2303 genes, 2.6%	0.660827
GTP binding	2 out of 84 genes, 2.4%	64 out of 2303 genes, 2.8%	0.686779
guanyl nucleotide binding	2 out of 84 genes, 2.4%	64 out of 2303 genes, 2.8%	0.686779
guanyl ribonucleotide binding	2 out of 84 genes, 2.4%	64 out of 2303 genes, 2.8%	0.686779
unfolded protein binding	2 out of 84 genes, 2.4%	68 out of 2303 genes, 3.0%	0.718864
carbon-carbon lyase activity	3 out of 84 genes, 3.6%	103 out of 2303 genes, 4.5%	0.735983
zinc ion binding	4 out of 84 genes, 4.8%	141 out of 2303 genes, 6.1%	0.768583
purine ribonucleoside triphosphate binding	15 out of 84 genes, 17.9%	480 out of 2303 genes, 20.8%	0.792453
endopeptidase activity	2 out of 84 genes, 2.4%	79 out of 2303 genes, 3.4%	0.793263
ATP binding	13 out of 84 genes, 15.5%	422 out of 2303 genes, 18.3%	0.79452
purine nucleoside binding	15 out of 84 genes, 17.9%	482 out of 2303 genes, 20.9%	0.798003
purine ribonucleoside binding	15 out of 84 genes, 17.9%	482 out of 2303 genes, 20.9%	0.798003
purine ribonucleotide binding	15 out of 84 genes, 17.9%	482 out of 2303 genes, 20.9%	0.798003
hydrolase activity, acting on ester bonds	2 out of 84 genes, 2.4%	80 out of 2303 genes, 3.5%	0.799096
carboxy-lyase activity	2 out of 84 genes, 2.4%	80 out of 2303 genes, 3.5%	0.799096
adenyl ribonucleotide binding	13 out of 84 genes, 15.5%	424 out of 2303 genes, 18.4%	0.80029
nucleoside binding	15 out of 84 genes, 17.9%	483 out of 2303 genes, 21.0%	0.80074
ribonucleoside binding	15 out of 84 genes, 17.9%	483 out of 2303 genes, 21.0%	0.80074
purine nucleotide binding	15 out of 84 genes, 17.9%	484 out of 2303 genes, 21.0%	0.803452
adenyl nucleotide binding	13 out of 84 genes, 15.5%	426 out of 2303 genes, 18.5%	0.805947
magnesium ion binding	3 out of 84 genes, 3.6%	118 out of 2303 genes, 5.1%	0.81592
ribonucleotide binding	15 out of 84 genes, 17.9%	497 out of 2303 genes, 21.6%	0.836427
transferase activity, transferring phosphorus-containing groups	3 out of 84 genes, 3.6%	138 out of 2303 genes, 6.0%	0.890214
peptidase activity, acting on L-amino acid peptides	2 out of 84 genes, 2.4%	114 out of 2303 genes, 5.0%	0.928071
kinase activity	2 out of 84 genes, 2.4%	116 out of 2303 genes, 5.0%	0.932477
peptidase activity	2 out of 84 genes, 2.4%	130 out of 2303 genes, 5.6%	0.956935
nucleotide binding	21 out of 84 genes, 25.0%	766 out of 2303 genes, 33.3%	0.962982
nucleoside phosphate binding	21 out of 84 genes, 25.0%	766 out of 2303 genes, 33.3%	0.962982
anion binding	15 out of 84 genes, 17.9%	591 out of 2303 genes, 25.7%	0.967744
small molecule binding	21 out of 84 genes, 25.0%	777 out of 2303 genes, 33.7%	0.969845
transferase activity	6 out of 84 genes, 7.1%	332 out of 2303 genes, 14.4%	0.987991
coenzyme binding	2 out of 84 genes, 2.4%	169 out of 2303 genes, 7.3%	0.988384
hydrolase activity	11 out of 84 genes, 13.1%	521 out of 2303 genes, 22.6%	0.991377
cofactor binding	3 out of 84 genes, 3.6%	224 out of 2303 genes, 9.7%	0.991534
catalytic activity	47 out of 84 genes, 56.0%	1634 out of 2303 genes, 71.0%	0.999028
